# Supplementary material for: Chiral self-recognition in a bispericyclic cyclodimerisation reaction of 1-azadienes
Source: Royal Society of Chemistry journal article supplement (doi:10.1039/d3qo01562a), 2023-01-01
Supplement: d3qo01562a1.pdf [file d3qo01562a1.pdf]

*Supporting Information for*

**Chiral Self-Recognition in a Bispericyclic  
Cyclodimerisation Reaction of 1-Azadienes.**

Adrián López-Francés,<sup>a</sup> Xabier del Corte,<sup>a</sup> Zuriñe Serna-Burgos,<sup>a</sup> Jesús M.  
de los Santos,<sup>a</sup> Abel de Cózar<sup>b,c\*</sup> and Javier Vicario<sup>a\*</sup>

<sup>a</sup> Department of Organic Chemistry I, Faculty of Pharmacy and Lascaray Research Center, University of the Basque Country, UPV/EHU. Paseo de la Universidad 7, 01006 Vitoria-Gasteiz, Spain.

<sup>b</sup> Department of Organic Chemistry I, Donostia International Physics Center (DIPC), University of the Basque Country, UPV/EHU. Paseo Manuel de Lardizabal, 3, 20018 Donostia-San Sebastián, Spain.

<sup>c</sup> Ikerbasque, Basque Foundation for Science, Plaza Euskadi 5, 48009, Bilbao, Spain.

Table of Contents

|                                                                                          |     |
|------------------------------------------------------------------------------------------|-----|
| I. General information .....                                                             | S2  |
| II. NMR study of the reaction.....                                                       | S3  |
| III. Synthesis and analytical data of <b>1</b> , <b>2</b> , <b>3a</b> and <b>5</b> ..... | S6  |
| IV. Crystallographic data for <b>2a</b> , <b>5a</b> and <b>5b</b> .....                  | S16 |
| V. Copies of NMR spectra.....                                                            | S25 |
| VI. Copies of 2D NMR spectra for <b>2d</b> and <b>5b</b> .....                           | S46 |
| VII. Computational methods .....                                                         | S50 |

## I. General information

All reagents and solvents were purchased from commercial sources, duly preserved, treated in the manner specified by the manufacturer and used without purification unless otherwise mentioned. Secondary monitoring of the reactions was carried out by TLC, using silica gel plates (Alugram, SIL, G/UV254) developed using VL-6C UV lamps ( $\lambda = 254$  nm). On some occasions, it was necessary to develop with  $\text{KMnO}_4$ , to get a better view of the majority of the stains. The products were purified by column chromatography over silica gel (200-400 size).  $^1\text{H}$ ,  $^{13}\text{C}$  and  $^{19}\text{F}$  Nuclear Magnetic Resonance (NMR) spectra were recorded at 25 °C on a Bruker Advance 400 (at 400 MHz, 101 MHz and 282 MHz respectively), and TMS was used as internal standard for  $^1\text{H}$  and  $^{13}\text{C}$ , and HF for  $^{19}\text{F}$  nucleus. Infrared spectra were recorded using a Nicolet iS10 FTIR spectrophotometer (Thermo Scientific), using the Smart iTR accessory and reporting the value of the peaks in  $\text{cm}^{-1}$ . IR spectra were taken as pure solids or oils. High resolution mass spectra (HRMS) were recorded by using Electrospray ionization (ESI) through a LC-QTOF method. X-ray data were obtained using an Agilent Technologies Super-Nova (Cu) diffractometer. Elemental analysis was conducted using Euro EA Elemental Analyzer (CHNS) from EuroVector. The removal of solvents was carried out using rotary evaporators Buchi R-100 and R-210.

## II. NMR study of the reaction

### Gradient Temperature Analysis

In a NMR tube, 1-(4-bromophenyl)-3-((4-bromophenyl)amino)-4-((dimethylamino)methyl)-5-phenyl-1,5-dihydro-2H-pyrrol-2-one **2a** (27 mg, 0.05 mmol) was introduced. The NMR tube was then evacuated and refilled with N<sub>2</sub> (g) for three cycles. Then, acetic anhydride (25 μL) and CDCl<sub>3</sub> (300 μL) were added. After vigorous manual stirring, <sup>1</sup>H NMR was conducted enabling the observation of the acetylated product **3a**. After that, Et<sub>3</sub>N (15 μL) was added and another NMR spectrum was recorded at room temperature, followed by a temperature ramp-up regimen with NMR spectra acquired at 5-degree intervals. Throughout the initial temperature increments (ranging from RT to 50°C), no significant changes were observed in the spectra after 30 minutes at each temperature. Consequently, a temperature of 55°C was determined as the optimum temperature for the generation of azadiene **4a**.

Note: During the initial three NMR acquisitions, the presence of residual starting material **2a** was discerned, attributable to the small quantity of acetic anhydride employed. Unfortunately, efforts to employ a higher amount of acetic anhydride during the experiment did not allow us to obtain clear spectra due to the suboptimal NMR shimming, resulting in inconclusive NMR spectra.

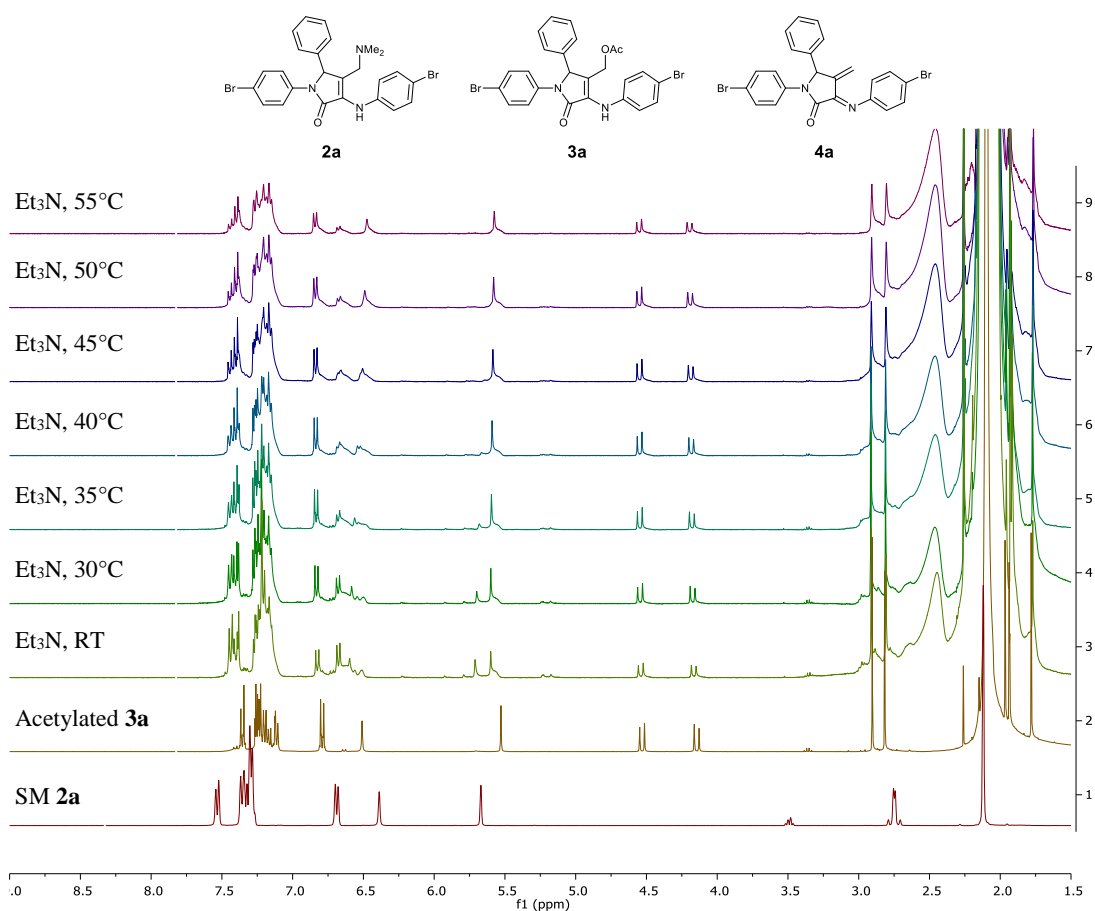

**Figure S1.** Temperature NMR study of the reaction.

### Kinetic Study: **3a** Disappearance vs **5a** Formation

In a NMR tube, 1-(4-bromophenyl)-3-((4-bromophenyl)amino)-4-((dimethylamino)methyl)-5-phenyl-1,5-dihydro-2*H*-pyrrol-2-one **2a** (27 mg, 0.05 mmol) was introduced. The NMR tube was then evacuated and refilled with N<sub>2</sub> (g) for three cycles. Then, acetic anhydride **3a** (25 μL) and CDCl<sub>3</sub> (300 μL) were added. After vigorous manual stirring, the generation of acetylated product **3a** was observed by <sup>1</sup>H NMR. Subsequently, Et<sub>3</sub>N (15 μL) was added, and the temperature was raised to 55°C. Proton NMR measurements were taken every 30 minutes during 12 hours, and these data were employed to study the disappearance of the acetylated product **3a** and the formation of the dimer **5a** (Table S1. / Figure S2.).

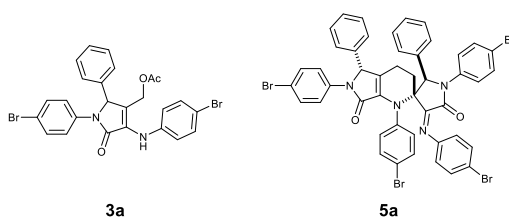

| Time / [h] | <b>3a</b> Disappearance / [%] | <b>5a</b> Formation / [%] |
|------------|-------------------------------|---------------------------|
| 0          | 100                           | 0                         |
| 0.5        | 97                            | 3                         |
| 1          | 94                            | 6                         |
| 1.5        | 94                            | 9                         |
| 2          | 91                            | 9                         |
| 2.5        | 88                            | 12                        |
| 3          | 88                            | 12                        |
| 3.5        | 88                            | 12                        |
| 4          | 85                            | 12                        |
| 4.5        | 85                            | 15                        |
| 5          | 85                            | 15                        |
| 5.5        | 82                            | 15                        |
| 6          | 82                            | 15                        |
| 6.5        | 82                            | 18                        |
| 7          | 79                            | 18                        |
| 7.5        | 79                            | 18                        |
| 8          | 79                            | 18                        |
| 8.5        | 79                            | 18                        |
| 9          | 79                            | 21                        |
| 9.5        | 79                            | 21                        |
| 10         | 76                            | 21                        |
| 10.5       | 76                            | 21                        |
| 11         | 76                            | 21                        |
| 11.5       | 76                            | 24                        |
| 12         | 72                            | 24                        |

**Table S1.** **3a** Disappearance vs **5a** Formation throughout 12 reaction hours.

### 3a Disappearance vs 5a Formation

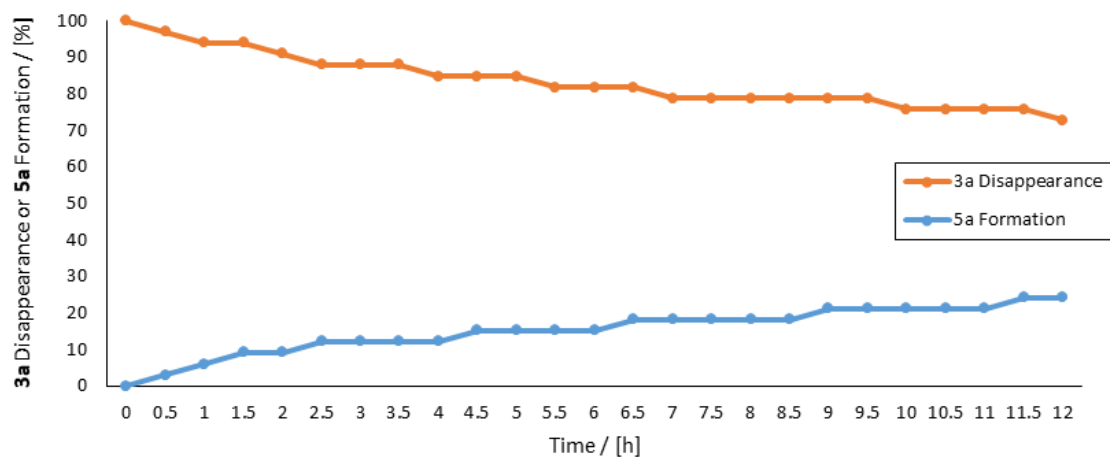

Figure S2. 3a Disappearance vs 5a Formation throughout 12 reaction hours.

### Azadiene 4a Detection

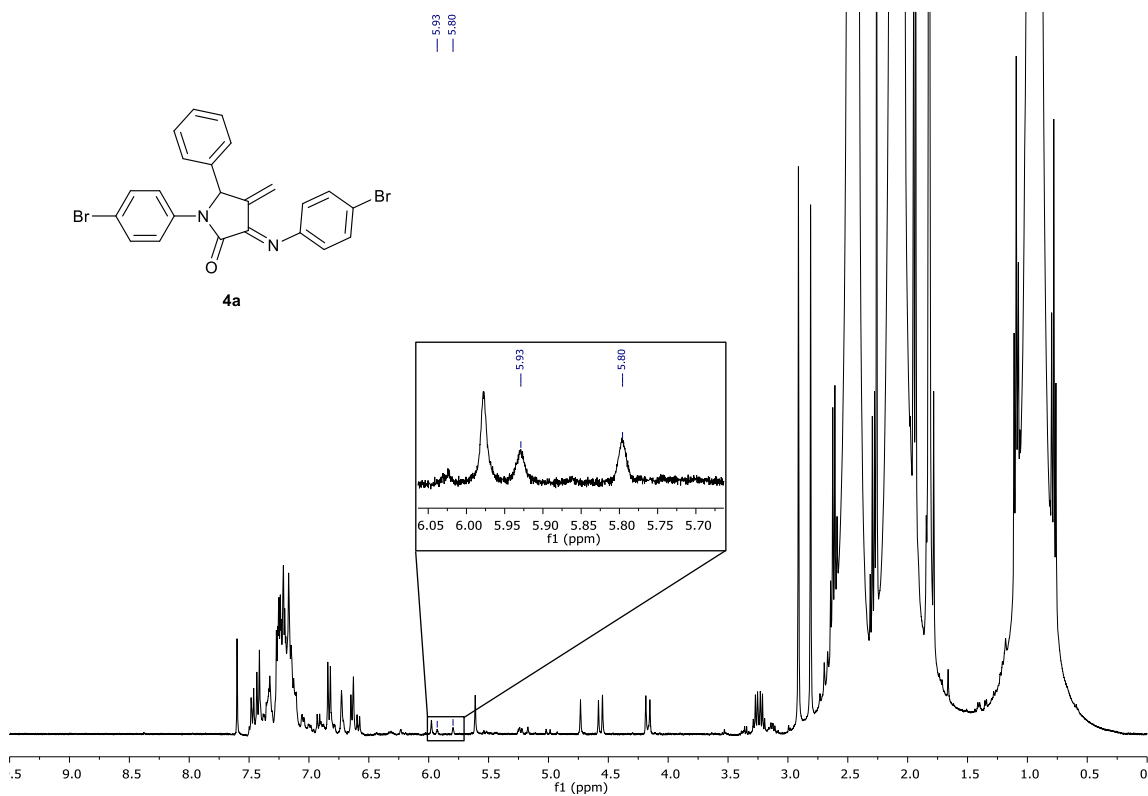

### III. Synthesis and characterization data.

#### General procedure for the synthesis of $\gamma$ -lactams **1**

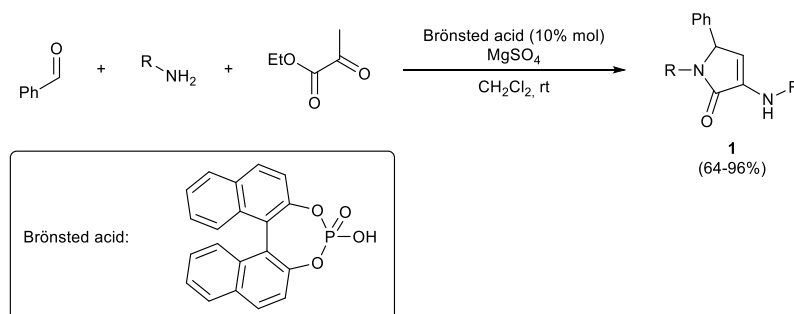

Following a literature procedure,<sup>1</sup> a solution of amine (2 equiv.), aldehyde (1 equiv.), ethyl pyruvate (3 equiv.) and binol-derived -phosphoric acid (10% mol) in CH<sub>2</sub>Cl<sub>2</sub> (10 mL) was stirred overnight at room temperature in the presence of anhydrous MgSO<sub>4</sub>. Next, the reaction was filtered and the resulting crude residue was purified by crystallization or flash column chromatography to afford pure 3-amino-3-pyrrolidin-2-ones **1**.

**1-(4-Bromophenyl)-3-((4-bromophenyl)amino)-5-phenyl-1,5-dihydro-2H-pyrrol-2-one (1a).** The

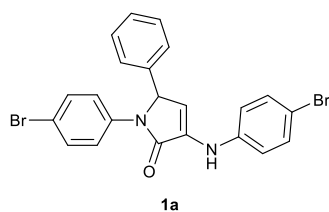

general procedure was followed using *p*-bromoaniline (0.344 g, 2 mmol, 2 equiv.), benzaldehyde (0.102 mL, 1 mmol, 1 equiv.) and ethyl pyruvate (0.335 mL, 3 mmol, 3 equiv.), affording 0.396 g (82%) of **1a** as a white solid after column chromatography (Hexanes/AcOEt 8:2). **M.p.** (Et<sub>2</sub>O): 225 – 226 °C. **<sup>1</sup>H NMR** (400 MHz, CDCl<sub>3</sub>)  $\delta$  7.45 (d, <sup>3</sup>J<sub>HH</sub> = 9.0 Hz, 2H, 2×CH<sub>Ar</sub>), 7.39 (d, <sup>3</sup>J<sub>HH</sub> = 9.2 Hz, 2H, 2×CH<sub>Ar</sub>), 7.38 (d, <sup>3</sup>J<sub>HH</sub> = 8.9 Hz, 2H, 2×CH<sub>Ar</sub>), 7.32–7.24 (m, 3H, 3×CH<sub>Ar</sub>), 7.18 (d, <sup>3</sup>J<sub>HH</sub> = 8.3 Hz, 2H, 2×CH<sub>Ar</sub>), 6.94 (d, <sup>3</sup>J<sub>HH</sub> = 8.9 Hz, 2H, 2×CH<sub>Ar</sub>), 6.66 (s, 1H, NH), 6.05 (d, <sup>3</sup>J<sub>HH</sub> = 2.6 Hz, 1H, =CH), 5.63 (d, <sup>3</sup>J<sub>HH</sub> = 2.6 Hz, 1H, CHN) ppm. **<sup>13</sup>C NMR {<sup>1</sup>H}** (101 MHz, CDCl<sub>3</sub>)  $\delta$  167.1 (C=O), 140.3 (C<sub>quat</sub>), 136.9 (C<sub>quat</sub>), 136.4 (C<sub>quat</sub>), 132.4 (2×CH<sub>Ar</sub>), 132.1 (2×CH<sub>Ar</sub>), 131.8 (C<sub>quat</sub>), 129.3 (2×CH<sub>Ar</sub>), 128.6 (CH<sub>Ar</sub>), 126.7 (2×CH<sub>Ar</sub>), 122.9 (2×CH<sub>Ar</sub>), 118.4 (2×CH<sub>Ar</sub>), 118.1 (C<sub>quat</sub>), 113.6 (C<sub>quat</sub>), 108.9 (=CH), 64.3 (CHN) ppm. **FTIR** (neat)  $\nu_{\text{max}}$ : 3327 (NH<sub>st</sub>), 1672 (C=O<sub>st</sub>), 1642 (C=C<sub>st</sub>), 1073 (C-Br<sub>st</sub>), 820 (C-Br<sub>st</sub>) cm<sup>-1</sup>. **HRMS** (ESI-TOF) *m/z*: [M+H]<sup>+</sup> calcd. for C<sub>22</sub>H<sub>17</sub>Br<sub>2</sub>N<sub>2</sub>O 482.9708, found 482.9715. Spectroscopic data are in agreement with the reported in the literature.<sup>1c</sup>

<sup>1</sup> (a) F. Palacios, J. Vicario and D. Aparicio. An Efficient Synthesis of Achiral and Chiral Cyclic Dehydro- $\alpha$ -Amino Acid Derivatives Through Nucleophilic Addition of Amines to  $\beta,\gamma$ -Unsaturated  $\alpha$ -Keto Esters. *Eur. J. Org. Chem.*, 2006, 2843-2850. <https://doi.org/10.1002/ejoc.200600092>. (b) X. del Corte, A. Maestro, J. Vicario, E. Martínez de Marigorta, and F. Palacios. Brønsted-Acid-Catalyzed Asymmetric Three-Component Reaction of Amines, Aldehydes, and Pyruvate Derivatives. Enantioselective Synthesis of Highly Functionalized  $\gamma$ -Lactam Derivatives. *Org. Lett.*, 2018, **20**, 317-320. <https://doi.org/10.1021/acs.orglett.7b03397>. (c) X. del Corte, A. López-Francés, E. Martínez de Marigorta, F. Palacios and J. Vicario. Stereo- and Regioselective [3+3] Annulation Reaction Catalyzed by Ytterbium: Synthesis of Bicyclic 1,4-Dihydropyridines. *Adv. Synth. Catal.*, 2021, **363**, 4761-4769. <https://doi.org/10.1002/adsc.202100785>.

**1-(4-Chlorophenyl)-3-((4-chlorophenyl)amino)-5-phenyl-1,5-dihydro-2H-pyrrol-2-one (1b).** The general procedure was followed using *p*-chloroaniline (0.212 g, 2 mmol, 2 equiv.), benzaldehyde

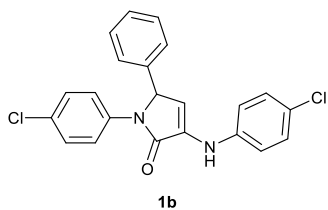

(0.102 mL, 1 mmol, 1 equiv.) and ethyl pyruvate (0.335 mL, 3 mmol, 3 equiv.), affording 0.304 g (77%) of **1b** as a white solid after crystallization (Et<sub>2</sub>O). **M.p.** (Et<sub>2</sub>O) = 207–209 °C. **<sup>1</sup>H NMR** (400 MHz, CDCl<sub>3</sub>) δ 7.53–7.46 (m, 2H, 2×CH<sub>Ar</sub>), 7.33–7.26 (m, 3H, 3×CH<sub>Ar</sub>), 7.26–7.22 (m, 4H, 4×CH<sub>Ar</sub>), 7.19 (dd, <sup>3</sup>J<sub>HH</sub> = 8.1, <sup>4</sup>J<sub>HH</sub> = 1.6 Hz, 2H, 2×CH<sub>Ar</sub>), 7.03–6.95 (m, 2H, 2×CH<sub>Ar</sub>), 6.63 (s, 1H, NH), 6.05 (d, <sup>3</sup>J<sub>HH</sub> = 2.6 Hz, 1H, =CH), 5.64 (d, <sup>3</sup>J<sub>HH</sub> = 2.6 Hz, 1H, CHN) ppm. **<sup>13</sup>C NMR {<sup>1</sup>H}** (101 MHz, CDCl<sub>3</sub>) δ 167.1 (C=O), 139.9 (C<sub>quat</sub>), 137.0 (C<sub>quat</sub>), 135.9 (C<sub>quat</sub>), 131.9 (C<sub>quat</sub>), 130.4 (C<sub>quat</sub>), 129.5 (2×CH<sub>Ar</sub>), 129.3 (2×CH<sub>Ar</sub>), 129.2 (2×CH<sub>Ar</sub>), 128.6 (CH<sub>Ar</sub>), 126.8 (2×CH<sub>Ar</sub>), 126.4 (C<sub>quat</sub>), 122.6 (2×CH<sub>Ar</sub>), 118.0 (2×CH<sub>Ar</sub>), 108.7 (=CH), 64.3 (CHN) ppm. **FTIR** (neat) ν<sub>max</sub>: 3328 (NH<sub>st</sub>), 1664 (C=O<sub>st</sub>), 1617 (C=C<sub>st</sub>) cm<sup>-1</sup>. **HRMS (ESI-TOF) m/z:** [M+H]<sup>+</sup> calcd for C<sub>22</sub>H<sub>17</sub>Cl<sub>2</sub>N<sub>2</sub>O 395.0718, found 395.0715.

**1-(4-Fluorophenyl)-3-((4-fluorophenyl)amino)-5-phenyl-1,5-dihydro-2H-pyrrol-2-one (1c).** The general procedure was followed, using *p*-fluoroaniline (0.222 g, 2 mmol, 2 equiv.), benzaldehyde (0.102 mL, 1 mmol, 1 equiv.) and ethyl pyruvate (0.335 mL, 3 mmol, 3 equiv.) to afford 0.344 g (95%) of **1c** as a yellow solid after crystallization (Et<sub>2</sub>O). **M.p.** (Et<sub>2</sub>O) = 213–215 °C. **<sup>1</sup>H NMR** (400 MHz, CDCl<sub>3</sub>) δ 7.49–7.43 (m, 2H, 2×CH<sub>Ar</sub>), 7.32–7.26 (m, 2H, 2×CH<sub>Ar</sub>), 7.25–7.22 (m, 1H, CH<sub>Ar</sub>), 7.20–7.16 (m, 2H, 2×CH<sub>Ar</sub>), 7.04–6.93

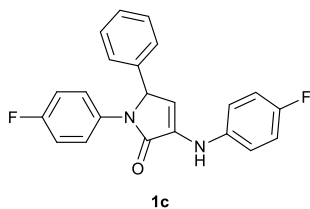

(m, 6H, 6×CH<sub>Ar</sub>), 6.55 (s, 1H, NH), 6.00 (d, <sup>3</sup>J<sub>HH</sub> = 2.6 Hz, 1H, =CH), 5.61 (d, <sup>3</sup>J<sub>HH</sub> = 2.6 Hz, 1H, CHN) ppm. **<sup>13</sup>C NMR {<sup>1</sup>H}** (101 MHz, CDCl<sub>3</sub>) δ 167.2 (C=O), 160.0 (d, <sup>1</sup>J<sub>FC</sub> = 245.1 Hz, C<sub>quat</sub>), 157.8 (d, <sup>1</sup>J<sub>FC</sub> = 240.7 Hz, C<sub>quat</sub>), 137.5 (d, <sup>4</sup>J<sub>FC</sub> = 2.4 Hz, C<sub>quat</sub>), 137.2 (C<sub>quat</sub>), 133.5 (d, <sup>4</sup>J<sub>FC</sub> = 3.0 Hz, C<sub>quat</sub>), 132.6 (C<sub>quat</sub>), 129.2 (2×CH<sub>Ar</sub>), 128.5 (CH<sub>Ar</sub>), 126.9 (2×CH<sub>Ar</sub>), 123.7 (d, <sup>2</sup>J<sub>FC</sub> = 8.0 Hz, 2×CH<sub>Ar</sub>), 118.4 (d, <sup>3</sup>J<sub>FC</sub> = 7.7 Hz, 2×CH<sub>Ar</sub>), 116.2 (d, <sup>3</sup>J<sub>FC</sub> = 28.0 Hz, 2×CH<sub>Ar</sub>), 115.9 (d, <sup>2</sup>J<sub>FC</sub> = 28.0 Hz, 2×CH<sub>Ar</sub>), 107.4 (=CH), 77.4 (CH), 64.7 (CHN) ppm. **<sup>19</sup>F NMR {<sup>1</sup>H}** (282 MHz, CDCl<sub>3</sub>) δ -116.9, -121.9 ppm. **FTIR** (neat) ν<sub>max</sub>: 3328 (NH<sub>st</sub>), 1664 (C=O<sub>st</sub>), 1615 (C=C<sub>st</sub>) cm<sup>-1</sup>. **HRMS (ESI-TOF) m/z:** [M+H]<sup>+</sup> calcd for C<sub>22</sub>H<sub>17</sub>F<sub>2</sub>N<sub>2</sub>O 363.1309, found 363.1307.

**5-Phenyl-1-(*p*-tolyl)-3-(*p*-tolylamino)-1,5-dihydro-2H-pyrrol-2-one (1d).** The general procedure was followed using *p*-toluidine (0.215 g, 2 mmol, 2 equiv.), benzaldehyde (0.102 mL, 1 mmol, 1 equiv.) and ethyl pyruvate (0.335 mL, 3 mmol, 3 equiv.), affording 0.340 g (96%) of **1d** as a white solid after crystallization (Et<sub>2</sub>O). **M.p.** (Et<sub>2</sub>O): 214 - 215 °C. **<sup>1</sup>H NMR** (400 MHz, CDCl<sub>3</sub>) δ 7.40 (d, <sup>3</sup>J<sub>HH</sub> = 8.5 Hz, 2H, 2×CH<sub>Ar</sub>), 7.32 -

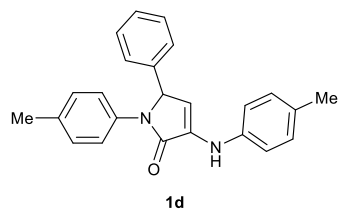

7.17 (m, 5H, 5×CH<sub>Ar</sub>), 7.10 (d, <sup>3</sup>J<sub>HH</sub> = 8.0 Hz, 2H, 2×CH<sub>Ar</sub>), 7.09 (d, <sup>3</sup>J<sub>HH</sub> = 8.0 Hz, 2H, 2×CH<sub>Ar</sub>), 6.98 (d, <sup>3</sup>J<sub>HH</sub> = 8.5 Hz, 2H, 2×CH<sub>Ar</sub>), 6.58 (s, 1H, NH), 6.01 (d, <sup>3</sup>J<sub>HH</sub> = 2.6 Hz, 1H, =CH), 5.63 (d, <sup>3</sup>J<sub>HH</sub> = 2.6 Hz, 1H, CHN), 2.29 (s, 3H, CH<sub>3</sub>), 2.26 (s, 3H, CH<sub>3</sub>) ppm. **<sup>13</sup>C NMR {<sup>1</sup>H}** (101 MHz, CDCl<sub>3</sub>) δ 167.0 (C=O), 138.8 (C<sub>quat</sub>), 137.6 (C<sub>quat</sub>), 134.8 (C<sub>quat</sub>), 134.8 (C<sub>quat</sub>), 132.0 (C<sub>quat</sub>), 130.5 (C<sub>quat</sub>), 129.9 (2×CH<sub>Ar</sub>), 129.6 (2×CH<sub>Ar</sub>), 129.0 (2×CH<sub>Ar</sub>), 128.2 (CH<sub>Ar</sub>), 126.9 (2×CH<sub>Ar</sub>), 121.6 (2×CH<sub>Ar</sub>), 116.8 (2×CH<sub>Ar</sub>), 107.2 (=CH), 64.3 (CHN), 21.0 (CH<sub>3</sub>), 20.8 (CH<sub>3</sub>) ppm. **FTIR** (neat) ν<sub>max</sub>: 3306 (NH<sub>st</sub>), 1684 (C=O<sub>st</sub>), 1665 (C=C<sub>st</sub>) cm<sup>-1</sup>. **HRMS (ESI-TOF) m/z:** [M+H]<sup>+</sup> calcd. for C<sub>24</sub>H<sub>23</sub>N<sub>2</sub>O 355.1810, found 355.1805. Spectroscopic data are in agreement with the reported in the literature.<sup>1b</sup>

**1,5-Diphenyl-3-(phenylamino)-1,5-dihydro-2H-pyrrol-2-one (1e).** The general procedure was

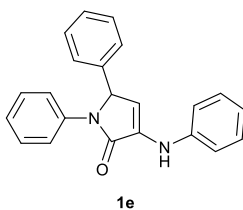

followed using aniline (0.182 mL, 2 mmol, 2 equiv.), benzaldehyde (0.102 mL, 1 mmol, 1 equiv.) and ethyl pyruvate (0.335 mL, 3 mmol, 3 equiv.), affording 0.212 g (65%) of **1e** as white crystals after crystallization (Et<sub>2</sub>O). **M.p.** (Et<sub>2</sub>O) = 224–225 °C. **<sup>1</sup>H NMR** (400 MHz, DMSO-*d*<sub>6</sub>) δ 8.09 (s, 1H, NH), 7.62 (dd, <sup>3</sup>J<sub>HH</sub> = 8.7 Hz, <sup>4</sup>J<sub>HH</sub> = 1.2 Hz, 2H, 2×CH<sub>Ar</sub>), 7.43–7.15 (m, 9H, 9×CH<sub>Ar</sub>), 7.09–7.04 (m, 2H, 2×CH<sub>Ar</sub>), 6.86 (tt, <sup>3</sup>J<sub>HH</sub> = 7.0 Hz, <sup>4</sup>J<sub>HH</sub> = 1.4 Hz, 2H, 2×CH<sub>Ar</sub>), 6.34 (d, <sup>3</sup>J<sub>HH</sub> = 2.7 Hz, 1H, =CH), 6.06 (d, <sup>3</sup>J<sub>HH</sub> = 2.7 Hz, 1H, CHN) ppm. **<sup>13</sup>C NMR** {<sup>1</sup>H} (101 MHz, DMSO-*d*<sub>6</sub>) δ 166.52 (C=O), 142.0 (C<sub>quat</sub>), 138.0 (C<sub>quat</sub>), 137.2 (C<sub>quat</sub>), 131.8 (C<sub>quat</sub>), 129.0 (2×CH<sub>Ar</sub>), 128.8 (2×CH<sub>Ar</sub>), 128.7 (2×CH<sub>Ar</sub>), 127.7 (CH<sub>Ar</sub>), 126.8 (2×CH<sub>Ar</sub>), 124.4 (CH<sub>Ar</sub>), 121.5 (2×CH<sub>Ar</sub>), 120.2 (CH<sub>Ar</sub>), 116.7 (2×CH<sub>Ar</sub>), 109.8 (=CH), 62.4 (CHN) ppm. **FTIR** (neat) ν<sub>max</sub>: 3303 (NH<sub>st</sub>), 1681 (C=O<sub>st</sub>), 1666 (C=C<sub>st</sub>) cm<sup>-1</sup>. **HRMS** (ESI-TOF) m/z: [M+H]<sup>+</sup>, calcd for C<sub>22</sub>H<sub>19</sub>N<sub>2</sub>O 327.1497, found 327.1501.

**1-(4-Methoxyphenyl)-3-((4-methoxyphenyl)amino)-5-phenyl-1,5-dihydro-2H-pyrrol-2-one (1f).**

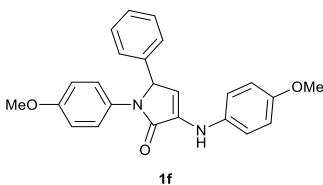

The general procedure was followed using *p*-anisidine (0.246 g, 2 mmol, 2 equiv.), benzaldehyde (0.102 mL, 1 mmol, 1 equiv.) and ethyl pyruvate (0.335 mL, 3 mmol, 3 equiv.), affording 0.300 g (78%) of **1f** as a white solid after column chromatography (Hexanes/AcOEt 8:2). **Mp** (Et<sub>2</sub>O): 198–200 °C. **<sup>1</sup>H NMR** (300 MHz, CDCl<sub>3</sub>) δ 7.36 (d, <sup>3</sup>J<sub>HH</sub> = 9.1 Hz, 2H, 2×CH<sub>Ar</sub>), 7.30 - 7.16 (m, 5H, 5×CH<sub>Ar</sub>), 7.03 (d, <sup>3</sup>J<sub>HH</sub> = 8.9 Hz, 2H, 2×CH<sub>Ar</sub>), 6.86 (d, <sup>3</sup>J<sub>HH</sub> = 8.9 Hz, 2H, 2×CH<sub>Ar</sub>), 6.81 (d, <sup>3</sup>J<sub>HH</sub> = 9.1 Hz, 2H, 2×CH<sub>Ar</sub>), 6.46 (bs, 1H, NH), 5.94 (d, <sup>3</sup>J<sub>HH</sub> = 2.5 Hz, 1H, =CH), 5.57 (d, <sup>3</sup>J<sub>HH</sub> = 2.5 Hz, 1H, CHN), 3.78 (s, 3H, CH<sub>3</sub>), 3.74 (s, 3H, CH<sub>3</sub>) ppm. **<sup>13</sup>C NMR** {<sup>1</sup>H} (75 MHz, CDCl<sub>3</sub>) δ 167.3 (C=O), 157.1 (C<sub>quat</sub>), 154.5 (C<sub>quat</sub>), 137.8 (C<sub>quat</sub>), 135.0 (C<sub>quat</sub>), 133.1 (C<sub>quat</sub>), 130.4 (C<sub>quat</sub>), 129.0 (2×CH<sub>Ar</sub>), 128.2 (2×CH<sub>Ar</sub>), 127.1 (2×CH<sub>Ar</sub>), 123.9 (2×CH<sub>Ar</sub>), 118.6 (2×CH<sub>Ar</sub>), 114.8 (2×CH<sub>Ar</sub>), 114.3 (2×CH<sub>Ar</sub>), 106.3 (=CH), 64.9 (CHN), 55.7 (CH<sub>3</sub>), 55.5 (CH<sub>3</sub>) ppm. **FTIR** (neat) ν<sub>max</sub>: 3304 (NH<sub>st</sub>), 3017 (=CH<sub>st</sub>), 1669 (C=O<sub>st</sub>), 1659 (C=C<sub>st</sub>), 1250 (C-O<sub>st</sub>), 1032 (C-O<sub>st</sub>) cm<sup>-1</sup>. **HRMS** (ESI-TOF) m/z: [M+H]<sup>+</sup> calcd. for C<sub>24</sub>H<sub>23</sub>N<sub>2</sub>O<sub>3</sub> 387.1709, found 387.1702. Spectroscopic data are in agreement with the reported in the literature.<sup>1b</sup>



## General Procedure for the functionalization of $\gamma$ -lactams **1** with Eschenmoser salt

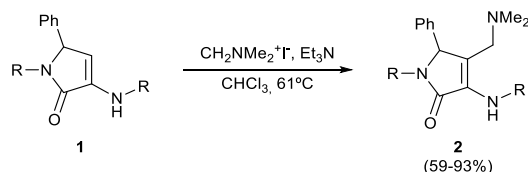

The corresponding 3-amino-3-pyrrolidin-2-one **1** (1 mmol, 1 equiv.) was stirred overnight with 1.5 equiv. of *N,N*-dimethylmethyleiminium iodide (0.278 g, 1.5 mmol, 1.5 equiv.) in the presence of freshly distilled triethylamine (0.279 mL, 2.0 mmol, 2 equiv.) in refluxing chloroform (3 mL) under  $\text{N}_2$  atmosphere. The reaction crude was acidified with 0.5 M HCl aqueous solution and extracted with dichloromethane ( $2 \times 20$  mL). The combined organic layers were dried with  $\text{MgSO}_4$  and purified by column chromatography, affording the corresponding pure functionalized  $\gamma$ -lactams **2**. In some cases, other purification processes were necessary as detailed for each compound.

### 1-(4-Bromophenyl)-3-((4-bromophenyl)amino)-4-((dimethylamino)methyl)-5-phenyl-1,5-dihydro-2H-pyrrol-2-one (**2a**).

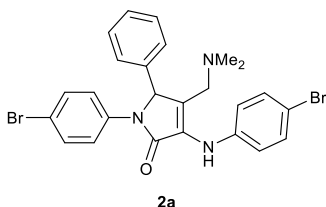

The general procedure was followed using 1-(4-bromophenyl)-3-((4-bromophenyl)amino)-5-phenyl-1,5-dihydro-2H-pyrrol-2-one **1a** (0.484 g, 1 mmol, 1 equiv.), affording 0.504 g (93%) of **2a** as orange crystals after chromatography (Hexanes/ AcOEt 7:3) followed by crystallization ( $\text{Et}_2\text{O}$  /Pentane 1:3). **M.p.** ( $\text{Et}_2\text{O}$  /Pentane) = 139–141 °C.  $^1\text{H NMR}$  (400 MHz,  $\text{CDCl}_3$ )  $\delta$  7.53 (d,  $^3J_{\text{HH}} = 7.6$  Hz, 2H,  $2 \times \text{CH}_{\text{Ar}}$ ), 7.37–7.25 (m, 9H,  $9 \times \text{CH}_{\text{Ar}}$ ), 6.68 (d,  $^3J_{\text{HH}} = 7.6$  Hz, 2H,  $2 \times \text{CH}_{\text{Ar}}$ ), 6.38 (s, 1H, NH), 5.66 (s, 1H, CH), 2.76 (d,  $^2J_{\text{HH}} = 14.5$  Hz, 1H,  $\text{CH}_A\text{CH}_B$ ), 2.72 (d,  $^2J_{\text{HH}} = 14.5$  Hz, 1H,  $\text{CH}_A\text{CH}_B$ ), 2.11 (s, 6H,  $2 \times \text{NCH}_3$ ) ppm.  $^{13}\text{C NMR}$   $\{^1\text{H}\}$  (101 MHz,  $\text{CDCl}_3$ )  $\delta$  167.5 (C=O), 141.8 ( $\text{C}_{\text{quat}}$ ), 136.8 ( $\text{C}_{\text{quat}}$ ), 136.8 ( $\text{C}_{\text{quat}}$ ), 132.0 ( $2 \times \text{CH}_{\text{Ar}}$ ), 131.9 ( $2 \times \text{CH}_{\text{Ar}}$ ), 130.7 ( $\text{C}_{\text{quat}}$ ), 130.6 ( $\text{C}_{\text{quat}}$ ), 129.2 ( $2 \times \text{CH}_{\text{Ar}}$ ), 128.5 ( $\text{CH}_{\text{Ar}}$ ), 126.8 ( $2 \times \text{CH}_{\text{Ar}}$ ), 122.0 ( $2 \times \text{CH}_{\text{Ar}}$ ), 119.7 ( $2 \times \text{CH}_{\text{Ar}}$ ), 117.3 ( $\text{C}_{\text{quat}}$ ), 113.6 ( $\text{C}_{\text{quat}}$ ), 64.4 (CH), 55.5 ( $\text{CH}_2$ ), 45.5 ( $2 \times \text{NCH}_3$ ) ppm. **FTIR** (neat)  $\nu_{\text{max}}$ : 3321 ( $\text{NH}_{\text{st}}$ ), 1689 ( $\text{C}=\text{O}_{\text{st}}$ ), 1604 ( $\text{C}=\text{C}_{\text{st}}$ )  $\text{cm}^{-1}$ . **HRMS** (ESI-TOF)  $m/z$ :  $[\text{M}+\text{H}]^+$  calcd for  $\text{C}_{25}\text{H}_{24}\text{Br}_2\text{N}_3\text{O}$  542.0286, found 542.0269.

### 1-(4-Chlorophenyl)-3-((4-chlorophenyl)amino)-4-((dimethylamino)methyl)-5-phenyl-1,5-dihydro-2H-pyrrol-2-one (**2b**).

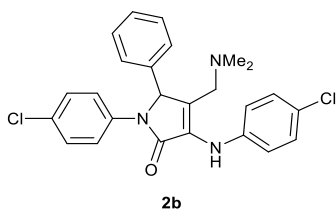

The general procedure was followed using 1-(*p*-chlorophenyl)-3-((*p*-chlorophenyl)amino)-5-phenyl-1,5-dihydro-2H-pyrrol-2-one (**1b**) to afford 0.281 g (62%) of **2b** as red solid after a chromatography column (Hexanes/ AcOEt 8:2).  $^1\text{H NMR}$  (400 MHz,  $\text{CDCl}_3$ )  $\delta$  7.54 (d,  $^3J_{\text{HH}} = 9.1$  Hz, 2H,  $2 \times \text{CH}_{\text{Ar}}$ ), 7.34–7.23 (m, 5H,  $5 \times \text{CH}_{\text{Ar}}$ ), 7.18 (d,  $^3J_{\text{HH}} = 9.0$  Hz, 2H,  $2 \times \text{CH}_{\text{Ar}}$ ), 7.14 (d,  $^3J_{\text{HH}} = 8.9$  Hz, 2H,  $2 \times \text{CH}_{\text{Ar}}$ ), 6.72 (d,  $^3J_{\text{HH}} = 8.9$  Hz, 2H,  $2 \times \text{CH}_{\text{Ar}}$ ), 6.25 (s, 1H, NH), 5.62 (s, 1H, CH), 2.73 (d,  $^2J_{\text{HH}} = 12.5$  Hz, 1H,  $\text{CH}_A\text{CH}_B$ ), 2.59 (d,  $^2J_{\text{HH}} = 12.5$  Hz, 1H,  $\text{CH}_A\text{CH}_B$ ), 2.08 (s, 6H,  $2 \times \text{NCH}_3$ ) ppm.  $^{13}\text{C NMR}$   $\{^1\text{H}\}$  (101 MHz,  $\text{CDCl}_3$ )  $\delta$  167.5 (C=O), 141.3 ( $\text{C}_{\text{quat}}$ ), 136.9 ( $\text{C}_{\text{quat}}$ ), 136.4 ( $\text{C}_{\text{quat}}$ ), 130.8 ( $\text{C}_{\text{quat}}$ ), 130.2 ( $\text{C}_{\text{quat}}$ ), 129.6 ( $\text{C}_{\text{quat}}$ ), 129.2 ( $2 \times \text{CH}_{\text{Ar}}$ ), 129.1 ( $2 \times \text{CH}_{\text{Ar}}$ ), 129.0 ( $2 \times \text{CH}_{\text{Ar}}$ ), 128.5 ( $\text{CH}_{\text{Ar}}$ ), 126.9 ( $2 \times \text{CH}_{\text{Ar}}$ ), 126.5 ( $\text{C}_{\text{quat}}$ ), 121.7 ( $2 \times \text{CH}_{\text{Ar}}$ ), 119.6 ( $2 \times \text{CH}_{\text{Ar}}$ ), 64.6 (CH), 55.6 ( $\text{CH}_2$ ), 45.5 ( $2 \times \text{NCH}_3$ ) ppm. **FTIR** (neat)  $\nu_{\text{max}}$ : 3399 (N-H<sub>st</sub>), 1695 ( $\text{C}=\text{O}_{\text{st}}$ )  $\text{cm}^{-1}$ . **HRMS** (ESI-TOF)  $m/z$ :  $[\text{M}+\text{H}]^+$  calcd for

C<sub>25</sub>H<sub>24</sub>Cl<sub>2</sub>N<sub>3</sub>O 452.1218, found 452.1228.

#### 4-((Dimethylamino)methyl)-1-(4-fluorophenyl)-3-((4-fluorophenyl)amino)-5-phenyl-1,5-

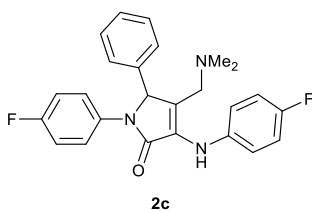

2c

**dihydro-2H-pyrrol-2-one (2c).** The general procedure was followed using 1-(*p*-fluorophenyl)-3-((*p*-fluorophenyl)amino)-5-phenyl-1,5-dihydro-2H-pyrrol-2-one (0.362 g, 1 mmol, 1 equiv.) **1c** to afford 0.248 g (59%) of **2c** as white solid after a chromatography column (Hexanes/ AcOEt 8:2). <sup>1</sup>H NMR (400 MHz, CDCl<sub>3</sub>) δ 7.56–7.48 (m, 2H, 2×CH<sub>Ar</sub>), 7.33–7.20 (m, 5H, 5×CH<sub>Ar</sub>), 6.98–6.86 (m, 4H, 4×CH<sub>Ar</sub>), 6.82

(dd, <sup>3</sup>J<sub>HH</sub> = 9.1 Hz, <sup>4</sup>J<sub>HH</sub> = 4.7 Hz, 2H, 2×CH<sub>Ar</sub>), 6.24 (s, 1H, NH), 5.61 (s, 1H, CH), 2.66 (m, 2H, CH<sub>2</sub>), 2.06 (s, 6H, 2×NCH<sub>3</sub>) ppm. <sup>13</sup>C NMR {<sup>1</sup>H} (101 MHz, CDCl<sub>3</sub>) δ 167.6 (C=O), 159.5 (d, <sup>1</sup>J<sub>FC</sub> = 244.2 Hz, C<sub>quat</sub>), 158.4 (d, <sup>1</sup>J<sub>FC</sub> = 240.5 Hz, C<sub>quat</sub>), 138.5 (d, <sup>4</sup>J<sub>FC</sub> = 2.6 Hz, C<sub>quat</sub>), 137.1 (C<sub>quat</sub>), 133.9 (d, <sup>4</sup>J<sub>FC</sub> = 2.6 Hz, C<sub>quat</sub>), 134.5 (C<sub>quat</sub>), 129.1 (2×CH<sub>Ar</sub>), 128.3 (CH<sub>Ar</sub>) 127.3 (C<sub>quat</sub>), 127.0 (2×CH<sub>Ar</sub>), 122.6 (d, <sup>4</sup>J<sub>FC</sub> = 8.1 Hz, 2×CH<sub>Ar</sub>), 120.9 (d, <sup>3</sup>J<sub>FC</sub> = 7.9 Hz, 2×CH<sub>Ar</sub>), 115.8 (d, <sup>3</sup>J<sub>FC</sub> = 1.3 Hz, 2×CH<sub>Ar</sub>), 115.6 (d, <sup>3</sup>J<sub>FC</sub> = 1.4 Hz, 2×CH<sub>Ar</sub>), 64.9 (CH), 55.2 (CH<sub>2</sub>), 45.5 (2×NCH<sub>3</sub>) ppm. <sup>19</sup>F NMR {<sup>1</sup>H} (282 MHz, CDCl<sub>3</sub>) δ –117.7, –121.5 ppm. FTIR (neat) ν<sub>max</sub>: 3297 (N–H<sub>st</sub>), 1699 (C=O<sub>st</sub>) cm<sup>-1</sup>. HRMS (ESI-TOF) m/z: [M+H]<sup>+</sup> calcd for C<sub>25</sub>H<sub>24</sub>F<sub>2</sub>N<sub>3</sub>O 420.1809, found 420.1819.

#### 4-((Dimethylamino)methyl)-5-phenyl-1-(*p*-tolyl)-3-(*p*-tolylamino)-1,5-dihydro-2H-pyrrol-2-one

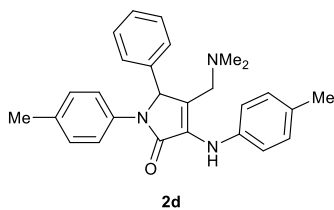

2d

**(2d).** The general procedure was followed, using 5-phenyl-1-(*p*-tolyl)-3-(*p*-tolylamino)-1,5-dihydro-2H-pyrrol-2-one **1d** (0.354 g, 1 mmol, 1 equiv.), affording 0.342 g (83%) of **2d** as red crystals after chromatography column (Hexanes/ AcOEt 8:2) followed by crystallization (Et<sub>2</sub>O/Pentane 1:3). **M.p.** (Et<sub>2</sub>O/Pentane) = 98–100 °C.

<sup>1</sup>H NMR (400 MHz, CDCl<sub>3</sub>) δ 7.49 (d, <sup>3</sup>J<sub>HH</sub> = 8.5 Hz, 2H, 2×CH<sub>Ar</sub>), 7.33–7.29 (m, 4H, 4×CH<sub>Ar</sub>), 7.25 (m, 1H, CH<sub>Ar</sub>), 7.06 (d, <sup>3</sup>J<sub>HH</sub> = 8.2 Hz, 2H, 2×CH<sub>Ar</sub>), 7.02 (d, <sup>3</sup>J<sub>HH</sub> = 8.2 Hz, 2H, 2×CH<sub>Ar</sub>), 6.76 (d, <sup>3</sup>J<sub>HH</sub> = 8.5 Hz, 2H, 2×CH<sub>Ar</sub>), 6.12 (s, 1H, NH), 5.69 (s, 1H, CH), 2.78 (d, <sup>2</sup>J<sub>HH</sub> = 13.9 Hz, 1H, CH<sub>A</sub>CH<sub>B</sub>), 2.67 (d, <sup>2</sup>J<sub>HH</sub> = 13.9 Hz, 1H, CH<sub>A</sub>CH<sub>B</sub>), 2.28 (s, 3H, CH<sub>3Tol</sub>), 2.24 (s, 3H, CH<sub>3Tol</sub>), 2.11 (s, 6H, 2×NCH<sub>3</sub>) ppm. <sup>13</sup>C NMR {<sup>1</sup>H} (101 MHz, CDCl<sub>3</sub>) δ 167.7 (C=O), 140.1 (C<sub>quat</sub>), 137.8 (C<sub>quat</sub>), 135.4 (C<sub>quat</sub>), 134.0 (C<sub>quat</sub>), 131.3 (C<sub>quat</sub>), 131.3 (C<sub>quat</sub>), 129.6 (2×CH<sub>Ar</sub>), 129.5 (2×CH<sub>Ar</sub>), 128.9 (2×CH<sub>Ar</sub>), 128.0 (2×CH<sub>Ar</sub>), 127.2 (C<sub>quat</sub>), 127.0 (2×CH<sub>Ar</sub>), 120.1 (2×CH<sub>Ar</sub>), 119.1 (CH<sub>Ar</sub>), 64.6 (CH), 55.3 (CH<sub>2</sub>), 45.5 (2×NCH<sub>3</sub>), 20.9 (CH<sub>3Tol</sub>), 20.8 (CH<sub>3Tol</sub>) ppm. FTIR (neat) ν<sub>max</sub>: 3331 (NH<sub>st</sub>), 1689 (C=O<sub>st</sub>), 1614 (C=C<sub>st</sub>) cm<sup>-1</sup>. HRMS (ESI-TOF) m/z: [M – Me<sub>2</sub>N]<sup>+</sup>, calcd for C<sub>25</sub>H<sub>23</sub>N<sub>2</sub>O 367.1810, found 367.1806.

#### 4-((Dimethylamino)methyl)-1,5-diphenyl-3-(phenylamino)-1,5-dihydro-2H-pyrrol-2-one (2e).

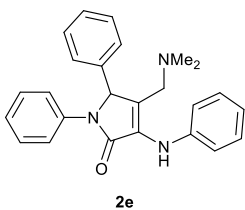

2e

The general procedure was followed using 1,5-diphenyl-3-(phenylamino)-1,5-dihydro-2H-pyrrol-2-one (0.326 g, 1 mmol, 1 equiv.) **1e** to afford 0.314 g (82%) of **2e** as white crystals after a chromatography column (Hexanes/ AcOEt 8:2) followed by a crystallization (Et<sub>2</sub>O/Pentane 1:3). **M.p.** (Et<sub>2</sub>O/Pentane) = 140–142 °C. <sup>1</sup>H NMR (400 MHz, CDCl<sub>3</sub>) δ 7.56 (dd, <sup>3</sup>J<sub>HH</sub> = 8.8 Hz, <sup>4</sup>J<sub>HH</sub> = 1.2 Hz, 2H, 2×CH<sub>Ar</sub>), 7.28–7.32 (m, 4H, 4×CH<sub>Ar</sub>), 7.21–7.16 (m, 3H, 3×CH<sub>Ar</sub>), 7.15–7.11 (m, 2H, 2×CH<sub>Ar</sub>), 6.99–6.94 (m, 1H, 1×CH<sub>Ar</sub>), 6.84 (tt, <sup>3</sup>J<sub>HH</sub> = 7.3 Hz, <sup>4</sup>J<sub>HH</sub> = 1.2 Hz, 1H, CH<sub>Ar</sub>), 6.75 (dd, <sup>3</sup>J<sub>HH</sub> = 8.8 Hz, <sup>4</sup>J<sub>HH</sub> = 1.2 Hz, 2H, 2×CH<sub>Ar</sub>), 6.17 (s, 1H, NH), 5.67 (s, 1H, CH), 3.05–2.36 (m, 2H, CH<sub>2</sub>), 2.04 (s, 6H, 2×NCH<sub>3</sub>) ppm. <sup>13</sup>C NMR {<sup>1</sup>H} (101 MHz, CDCl<sub>3</sub>) δ 167.8 (C=O),

142.8 (C<sub>quat</sub>), 137.9 (C<sub>quat</sub>), 137.5 (C<sub>quat</sub>), 130.8 (C<sub>quat</sub>), 129.4 (CH<sub>Ar</sub>), 129.1 (2×CH<sub>Ar</sub>), 129.0 (2×CH<sub>Ar</sub>), 128.9 (2×CH<sub>Ar</sub>), 128.1 (CH<sub>Ar</sub>), 126.9 (2×CH<sub>Ar</sub>), 124.4 (CH<sub>Ar</sub>), 121.5 (CH<sub>Ar</sub>), 120.6 (2×CH<sub>Ar</sub>), 118.3 (2×CH<sub>Ar</sub>), 64.5 (CH), 55.5 (CH<sub>2</sub>), 45.5 (2×NCH<sub>3</sub>) ppm. **FTIR** (neat)  $\nu_{\text{max}}$ : 3039 (=CH<sub>st</sub>), 1691 (C=O<sub>st</sub>) cm<sup>-1</sup>. **HRMS** (ESI-TOF) m/z: [M+H]<sup>+</sup> calcd for C<sub>25</sub>H<sub>26</sub>N<sub>3</sub>O 384.2076, found 384.2074.

**4-((Dimethylamino)methyl)-1-(4-methoxyphenyl)-3-((4-methoxyphenyl)amino)-5-phenyl-1,5-dihydro-2H-pyrrol-2-one (5f).** The general procedure was

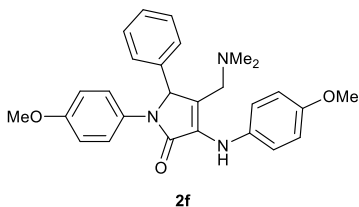

followed using 1-(4-methoxyphenyl)-3-((4-methoxyphenyl)amino)-5-phenyl-1,5-dihydro-2H-pyrrol-2-one (0.386 g, 1 mmol, 1 equiv.) **1f** to afford 0.310 g (70%) of **2f** as an orange oil after a chromatography column (Hexanes/ AcOEt 8:2).

**<sup>1</sup>H NMR** (400 MHz, CDCl<sub>3</sub>)  $\delta$  7.46 (d, <sup>3</sup>J<sub>HH</sub> = 9.2 Hz, 2H, 2×CH<sub>Ar</sub>), 7.31–7.27 (m, 5H, 5×CH<sub>Ar</sub>), 6.89 (d, <sup>3</sup>J<sub>HH</sub> = 8.9 Hz, 2H, 2×CH<sub>Ar</sub>), 6.79 (d, <sup>3</sup>J<sub>HH</sub> = 8.9 Hz, 2H, 2×CH<sub>Ar</sub>), 6.78 (d, <sup>3</sup>J<sub>HH</sub> = 9.2 Hz, 2H, 2×CH<sub>Ar</sub>), 6.07 (s, 1H, NH), 5.63 (s, 1H, CH), 3.76 (s, 3H, OCH<sub>3</sub>), 3.71 (s, 3H, OCH<sub>3</sub>), 2.69 (d, <sup>2</sup>J<sub>HH</sub> = 13.8 Hz, 1H, CH<sub>A</sub>CH<sub>B</sub>), 2.61 (d, <sup>2</sup>J<sub>HH</sub> = 13.8 Hz, 1H, CH<sub>A</sub>CH<sub>B</sub>), 2.08 (s, 6H, 2×NCH<sub>3</sub>) ppm. **<sup>13</sup>C NMR {<sup>1</sup>H}** (101 MHz, CDCl<sub>3</sub>)  $\delta$  167.6 (C=O), 156.6 (C<sub>quat</sub>), 155.6 (C<sub>quat</sub>), 137.7 (C<sub>quat</sub>), 135.4 (C<sub>quat</sub>), 132.3 (C<sub>quat</sub>), 131.5 (C<sub>quat</sub>), 131.0 (C<sub>quat</sub>), 128.9 (2×CH<sub>Ar</sub>), 128.0 (2×CH<sub>Ar</sub>), 127.2 (2×CH<sub>Ar</sub>), 122.9 (2×CH<sub>Ar</sub>), 122.4 (CH<sub>Ar</sub>), 114.4 (2×CH<sub>Ar</sub>), 114.2 (2×CH<sub>Ar</sub>), 65.1 (CH), 55.6 (OCH<sub>3</sub>), 55.4 (OCH<sub>3</sub>), 54.7 (CH<sub>2</sub>), 45.3 (2×NCH<sub>3</sub>) ppm. **FTIR** (neat)  $\nu_{\text{max}}$ : 3035 (=CH<sub>st</sub>), 1688 (C=O<sub>st</sub>) cm<sup>-1</sup>. **HRMS** (ESI-TOF) m/z: [M+H]<sup>+</sup> calcd for C<sub>27</sub>H<sub>30</sub>N<sub>3</sub>O<sub>3</sub> 444.2287, found 444.2277.

## General Procedure for the synthesis of and isolation of acetylated lactam **3d**

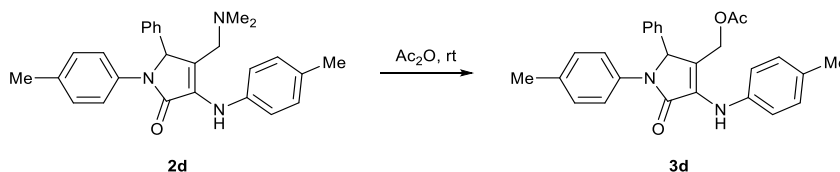

To a solution of 4-((dimethylamino)methyl)-5-phenyl-1-(*p*-tolyl)-3-(*p*-tolylamino)-1,5-dihydro-2*H*-pyrrol-2-one **2d** (0.367 g, 1 mmol, 1 equiv.) in chloroform (3 ml), 12 equivalents of acetic anhydride (1.1 ml) were added at room temperature. After 5 minutes, the solvent was evaporated and the obtained residue was dried in a vacuum pump, where the product crystallized spontaneously. The red crystals were washed with Et<sub>2</sub>O, affording pure **3d**.

**(5-Oxo-2-phenyl-1-(*p*-tolyl)-4-(*p*-tolylamino)-2,5-dihydro-1*H*-pyrrol-3-yl)methyl acetate (**3d**)**. The

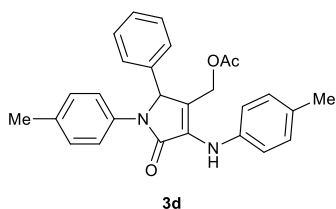

procedure was followed, affording 0.397 g (93%) of **3d** as red crystals. **M.p.** (Acetic acid) = 162–164 °C. **<sup>1</sup>H NMR** (400 MHz, CDCl<sub>3</sub>) δ 7.39 (d, <sup>3</sup>J<sub>HH</sub> = 8.5 Hz, 2H, 2×CH<sub>Ar</sub>), 7.32–7.19 (m, 5H, 5×CH<sub>Ar</sub>), 7.07 (d, <sup>3</sup>J<sub>HH</sub> = 8.3 Hz, 2H, 2×CH<sub>Ar</sub>), 7.07 (d, <sup>3</sup>J<sub>HH</sub> = 8.5 Hz, 2H, 2×CH<sub>Ar</sub>), 6.96 (d, <sup>3</sup>J<sub>HH</sub> = 8.3 Hz, 2H, 2×CH<sub>Ar</sub>), 6.34 (s, 1H, NH), 5.57 (s, 1H, CH), 4.62 (d, <sup>2</sup>J<sub>HH</sub> = 13.3 Hz, 1H, CH<sub>A</sub>CH<sub>B</sub>), 4.22 (d, <sup>2</sup>J<sub>HH</sub> = 13.3 Hz, 1H, CH<sub>A</sub>CH<sub>B</sub>), 2.29 (s, 3H, CH<sub>3Tol</sub>), 2.25 (s, 3H, CH<sub>3Tol</sub>), 1.88 (s, 3H, CH<sub>3</sub>). **<sup>13</sup>C NMR** {<sup>1</sup>H} (101 MHz, CDCl<sub>3</sub>) δ 170.6 (C=O), 167.0 (C=O), 138.2 (C<sub>quat</sub>), 136.7 (C<sub>quat</sub>), 134.8 (C<sub>quat</sub>), 134.6 (C<sub>quat</sub>), 133.1 (C<sub>quat</sub>), 132.6 (C<sub>quat</sub>), 129.8 (2×CH<sub>Ar</sub>), 129.6 (2×CH<sub>Ar</sub>), 129.1 (2×CH<sub>Ar</sub>), 128.5 (CH<sub>Ar</sub>), 127.3 (2×CH<sub>Ar</sub>), 121.9 (2×CH<sub>Ar</sub>), 120.9 (2×CH<sub>Ar</sub>), 115.3 (C<sub>quat</sub>), 65.4 (CH), 58.1 (CH<sub>2</sub>), 21.0 (CH<sub>3Tol</sub>), 20.9 (CH<sub>3Tol</sub>), 20.7 (CH<sub>3</sub>) ppm. **FTIR** (neat) ν<sub>max</sub>: 3388 (NH<sub>st</sub>), 1739 (C=O<sub>st</sub>), 1675 (C=O<sub>st</sub>), 1615 (C=O<sub>st</sub>) cm<sup>-1</sup>. **HRMS** (ESI-TOF) m/z: [M+H]<sup>+</sup> calcd for C<sub>27</sub>H<sub>27</sub>N<sub>2</sub>O<sub>3</sub> 427.2022, found 427.2025.

## General Procedure for the synthesis of spirocicles 5

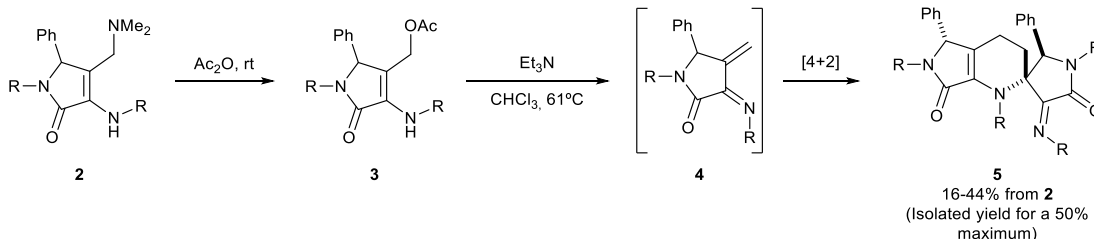

A solution of the corresponding functionalized  $\gamma$ -lactam **2** (1 mmol) in chloroform (3 ml) was stirred at room temperature under the presence of 12 equivalents of acetic anhydride. After 5 minutes the formation of the acetylated intermediate **3** was detected by NMR. Then, acetic acid was removed under low pressure and freshly distilled triethylamine (1.2 equiv.) and  $\text{CHCl}_3$  were added to the reaction. The mixture was refluxed overnight. The reaction crude was acidified with 0.5 M HCl aqueous solution, and extracted with dichloromethane ( $2 \times 20$  mL). The combined organic layers were dried with  $\text{MgSO}_4$  and purified by chromatography, affording the corresponding spirocyclic dihydropyridines **5**.

**(2*R*\*,3*R*\*,5'*R*\*,*Z*)-1,1',6'-Tris(4-bromophenyl)-4-((4-bromophenyl)imino)-2,5'-diphenyl-3',4',5',6'-tetrahydrospiro[pyrrolidine-3,2'-pyrrolo[3,4-*b*]pyridine]-5,7'(1'*H*)-dione (5a)**. The general procedure was followed using 1-(4-bromophenyl)-3-((4-bromophenyl)amino)-4-((dimethylamino)methyl)-5-phenyl-1,5-dihydro-2*H*-pyrrol-2-one **2a** (0.541 g, 1 mmol) to afford 0.377 g (38%) of **5a** as a brown oil after a chromatography column (Hexanes/ AcOEt 95:05). <sup>1</sup>H NMR (400 MHz,  $\text{CDCl}_3$ )  $\delta$  7.54–7.43 (m, 8H,  $8 \times \text{CH}_{\text{Ar}}$ ), 7.42–7.20 (m, 14H,  $14 \times \text{CH}_{\text{Ar}}$ ), 7.03 (d,  $^3J_{\text{HH}} = 8.5$  Hz, 2H,  $2 \times \text{CH}_{\text{Ar}}$ ), 6.26 (d,  $^3J_{\text{HH}} = 8.4$  Hz, 2H,  $2 \times \text{CH}_{\text{Ar}}$ ), 5.53 (s, 1H, CH), 4.89 (s, 1H, CH), 2.42–2.18 (m, 2H,  $2 \times \text{CH}_2$ ), 1.71 (m, 1H,  $\text{CH}_A\text{CH}_B$ ), 1.46 (m, 1H,  $\text{CH}_A\text{CH}_B$ ) ppm. <sup>13</sup>C NMR (<sup>1</sup>H) (101 MHz,  $\text{CDCl}_3$ )  $\delta$  166.0 ( $\text{C}_{\text{quat}}$ ), 161.3 ( $\text{C}_{\text{quat}}$ ), 157.3 ( $\text{C}_{\text{quat}}$ ), 147.3 ( $\text{C}_{\text{quat}}$ ), 142.0 ( $\text{C}_{\text{quat}}$ ), 137.1 ( $\text{C}_{\text{quat}}$ ), 137.0 ( $\text{C}_{\text{quat}}$ ), 136.9 ( $\text{C}_{\text{quat}}$ ), 135.5 ( $\text{C}_{\text{quat}}$ ), 134.5 ( $\text{C}_{\text{quat}}$ ), 133.5 ( $\text{C}_{\text{quat}}$ ), 132.7 ( $2 \times \text{CH}_{\text{Ar}}$ ), 132.2 ( $2 \times \text{CH}_{\text{Ar}}$ ), 132.0 ( $2 \times \text{CH}_{\text{Ar}}$ ), 131.9 ( $\text{CH}_{\text{Ar}}$ ), 131.6 ( $2 \times \text{CH}_{\text{Ar}}$ ), 129.9 ( $2 \times \text{CH}_{\text{Ar}}$ ), 129.5 ( $\text{CH}_{\text{Ar}}$ ), 129.5 ( $2 \times \text{CH}_{\text{Ar}}$ ), 128.8 ( $2 \times \text{CH}_{\text{Ar}}$ ), 126.0 ( $2 \times \text{CH}_{\text{Ar}}$ ), 123.0 ( $2 \times \text{CH}_{\text{Ar}}$ ), 122.1 ( $2 \times \text{CH}_{\text{Ar}}$ ), 121.5 ( $2 \times \text{CH}_{\text{Ar}}$ ), 121.4 ( $\text{C}_{\text{quat}}$ ), 120.0 ( $\text{C}_{\text{quat}}$ ), 119.4 ( $2 \times \text{CH}_{\text{Ar}}$ ), 118.2 ( $\text{C}_{\text{quat}}$ ), 117.2 ( $\text{C}_{\text{quat}}$ ), 72.3 (CH), 66.9 ( $\text{C}_{\text{quat}}$ ), 65.1 (CH), 24.6 ( $\text{CH}_2$ ), 18.2 ( $\text{CH}_2$ ) ppm. FTIR (neat)  $\nu_{\text{max}}$ : 1699 ( $\text{C}=\text{O}_{\text{st}}$ ), 1678 ( $\text{C}=\text{N}_{\text{st}}$ ), 1607 ( $\text{C}=\text{C}_{\text{st}}$ )  $\text{cm}^{-1}$ . HRMS (ESI-TOF, APCI) product decomposition during analysis. Elem. Anal. % calcd. for  $\text{C}_{46}\text{H}_{32}\text{Br}_4\text{N}_4\text{O}_2$  C, 55.67; H, 3.25; N, 5.65; found C, 55.55; H, 3.42; N, 5.66.

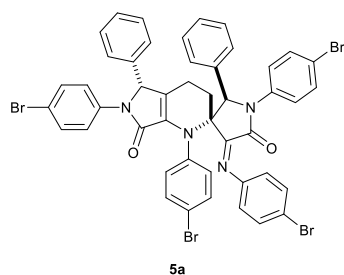

**(2*R*\*,3*R*\*,5'*R*\*,*Z*)-1,1',6'-Tris(4-chlorophenyl)-4-((4-chlorophenyl)imino)-2,5'-diphenyl-3',4',5',6'-tetrahydrospiro[pyrrolidine-3,2'-pyrrolo[3,4-*b*]pyridine]-5,7'(1'*H*)-dione (5b)**. The general procedure was followed using 1-(4-chlorophenyl)-3-((4-chlorophenyl)amino)-4-((dimethylamino)methyl)-5-phenyl-1,5-dihydro-2*H*-pyrrol-2-one **2b** (0.452 g, 1 mmol) to afford 0.610 g (37%) of **5b** as yellow solid after a chromatography column (Hexanes/ AcOEt 9:1). **M.p.** ( $\text{Et}_2\text{O}$ ) = 224–226 °C. <sup>1</sup>H NMR

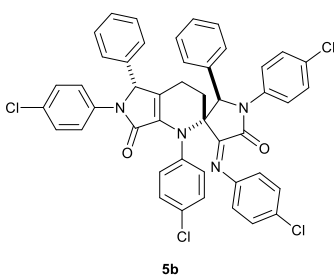

(400 MHz, CDCl<sub>3</sub>)  $\delta$  7.62–7.40 (m, 6H, 6 $\times$ CH<sub>Ar</sub>), 7.40–6.96 (m, 18H, 18 $\times$ CH<sub>Ar</sub>), 6.35 (d, <sup>3</sup>J<sub>HH</sub> = 8.6 Hz, 2H, 2 $\times$ CH<sub>Ar</sub>), 5.54 (s, 1H, CH), 4.91 (s, 1H, CH), 2.65–2.06 (m, 2H, 2 $\times$ CH<sub>2</sub>), 1.71 (m, 1H, CH<sub>A</sub>CH<sub>B</sub>), 1.49 (m, 1H, CH<sub>A</sub>CH<sub>B</sub>) ppm. <sup>13</sup>C NMR {<sup>1</sup>H} (101 MHz, CDCl<sub>3</sub>)  $\delta$  166.0 (C<sub>quat</sub>), 161.4 (C<sub>quat</sub>), 157.4 (C<sub>quat</sub>), 146.8 (C<sub>quat</sub>), 141.5 (C<sub>quat</sub>), 136.9 (C<sub>quat</sub>), 136.5 (C<sub>quat</sub>), 136.4 (C<sub>quat</sub>), 135.5 (C<sub>quat</sub>), 134.4 (C<sub>quat</sub>), 133.6 (C<sub>quat</sub>), 133.4 (C<sub>quat</sub>), 132.1 (C<sub>quat</sub>), 130.5 (C<sub>quat</sub>), 129.8 (2 $\times$ CH<sub>Ar</sub>), 129.6 (2 $\times$ CH<sub>Ar</sub>), 129.5 (CH<sub>Ar</sub>), 129.4 (C<sub>quat</sub>), 129.2 (4 $\times$ CH<sub>Ar</sub>), 129.0 (4 $\times$ CH<sub>Ar</sub>), 128.8 (CH<sub>Ar</sub>), 128.7 (4 $\times$ CH<sub>Ar</sub>), 126.0 (2 $\times$ CH<sub>Ar</sub>), 122.8 (2 $\times$ CH<sub>Ar</sub>), 121.3 (2 $\times$ CH<sub>Ar</sub>), 119.1 (2 $\times$ CH<sub>Ar</sub>), 72.4 (CH), 67.0 (C<sub>quat</sub>), 65.2 (CH), 24.6 (CH<sub>2</sub>), 18.2 (CH<sub>2</sub>) ppm. FTIR (neat)  $\nu_{\text{max}}$ : 1712 (C=O<sub>st</sub>), 1682 (C=N<sub>st</sub>), 1494 (C=C<sub>st</sub>) cm<sup>-1</sup>. HRMS (ESI-TOF) m/z: [M+H]<sup>+</sup> calcd for C<sub>46</sub>H<sub>33</sub>Cl<sub>4</sub>N<sub>4</sub>O<sub>2</sub> 813.1358, found 813.1359.

**(2*R*\*,3*R*\*,5*R*\*,*Z*)-1,1',6'-Tris(4-fluorophenyl)-4-((4-fluorophenyl)imino)-2,5'-diphenyl-3',4',5',6'-tetrahydrospiro[pyrrolidine-3,2'-pyrrolo[3,4-*b*]pyridine]-5,7'(1*H*)-dione (5c).** The general

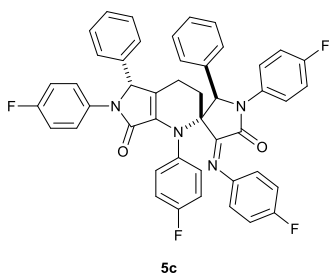

5c

procedure was followed using 4-((dimethylamino)methyl)-1-(4-fluorophenyl)-3-((4-fluorophenyl)amino)-5-phenyl-1,5-dihydro-2*H*-pyrrol-2-one **2c** (0.419 g, 1 mmol) to afford 0.240 mg (16%) of **5c** as orange solid (Hexanes/ AcOEt 9:1). **M.p.** (Et<sub>2</sub>O) = 192–194 °C. <sup>1</sup>H NMR (400 MHz, CDCl<sub>3</sub>)  $\delta$  7.60–7.39 (m, 6H, 6 $\times$ CH<sub>Ar</sub>), 7.35–7.22 (m, 7H, 7 $\times$ CH<sub>Ar</sub>), 7.24–7.14 (m, 2H, 2 $\times$ CH<sub>Ar</sub>), 7.06 (t, <sup>3</sup>J<sub>HH</sub> = 8.3 Hz, 2H, 2 $\times$ CH<sub>Ar</sub>), 7.00–6.78 (m, 7H, 7 $\times$ CH<sub>Ar</sub>), 6.43 (dd, <sup>3</sup>J<sub>HH</sub> = 8.8 Hz, <sup>4</sup>J<sub>FH</sub> = 4.8 Hz, 2H, 2 $\times$ CH<sub>Ar</sub>), 5.53 (s, 1H, CH), 4.89 (s, 1H, CH), 2.40–2.21 (m, 2H, 2 $\times$ CH<sub>2</sub>), 1.73 (m, 1H, CH<sub>A</sub>CH<sub>B</sub>), 1.52 (m, 1H, CH<sub>A</sub>CH<sub>B</sub>) ppm. <sup>13</sup>C NMR {<sup>1</sup>H} (101 MHz, CDCl<sub>3</sub>)  $\delta$  166.1 (C<sub>quat</sub>), 161.7 (d, <sup>1</sup>J<sub>FC</sub> = 247.5 Hz, C<sub>quat</sub>), 160.8 (d, <sup>1</sup>J<sub>FC</sub> = 247.5 Hz, C<sub>quat</sub>), 160.4 (d, <sup>1</sup>J<sub>FC</sub> = 243.7 Hz, C<sub>quat</sub>), 161.5 (C<sub>quat</sub>), 159.4 (d, <sup>1</sup>J<sub>FC</sub> = 244.2 Hz, C<sub>quat</sub>), 157.6 (C<sub>quat</sub>), 144.2 (d, <sup>4</sup>J<sub>FC</sub> = 2.9 Hz, C<sub>quat</sub>), 139.0 (d, <sup>4</sup>J<sub>FC</sub> = 3.1 Hz, C<sub>quat</sub>), 137.0 (C<sub>quat</sub>), 135.8 (C<sub>quat</sub>), 134.0 (d, <sup>4</sup>J<sub>FC</sub> = 3.0 Hz, C<sub>quat</sub>), 133.9 (d, <sup>4</sup>J<sub>FC</sub> = 2.8 Hz, C<sub>quat</sub>), 133.9 (C<sub>quat</sub>), 133.8 (C<sub>quat</sub>), 129.7 (2 $\times$ CH<sub>Ar</sub>), 129.3 (2 $\times$ CH<sub>Ar</sub>), 128.7 (CH<sub>Ar</sub>), 126.2 (2 $\times$ CH<sub>Ar</sub>), 123.9 (d, <sup>3</sup>J<sub>FC</sub> = 8.3 Hz, 2 $\times$ CH<sub>Ar</sub>), 122.2 (d, <sup>3</sup>J<sub>FC</sub> = 8.0 Hz, 2 $\times$ CH<sub>Ar</sub>), 119.7 (d, <sup>3</sup>J<sub>FC</sub> = 8.1 Hz, 2 $\times$ CH<sub>Ar</sub>), 116.3 (CH<sub>Ar</sub>), 116.1 (2 $\times$ CH<sub>Ar</sub>), 115.9 (2 $\times$ CH<sub>Ar</sub>), 115.8 (2 $\times$ CH<sub>Ar</sub>), 115.6 (2 $\times$ CH<sub>Ar</sub>), 115.4 (2 $\times$ CH<sub>Ar</sub>), 115.2 (2 $\times$ CH<sub>Ar</sub>), 72.9 (CH), 67.2 (C<sub>quat</sub>), 65.5 (CH), 24.4 (CH<sub>2</sub>), 18.1 (CH<sub>2</sub>) ppm. <sup>19</sup>F NMR {<sup>1</sup>H} (282 MHz, CDCl<sub>3</sub>)  $\delta$  -114.0, -114.4, -118.0, -118.5 ppm. FTIR (neat)  $\nu_{\text{max}}$ : 1708 (C=O<sub>st</sub>), 1681 (C=N<sub>st</sub>), 1503 (C=C<sub>st</sub>) cm<sup>-1</sup>. HRMS (ESI-TOF) m/z: [M+H]<sup>+</sup> calcd for C<sub>46</sub>H<sub>32</sub>F<sub>4</sub>N<sub>4</sub>O<sub>2</sub> 749.2540, found 749.2526.

**(2*R*\*,3*R*\*,5*R*\*,*Z*)-2,5'-Diphenyl-1,1',6'-tri-*p*-tolyl-4-(*p*-tolylimino)-3',4',5',6'-tetrahydrospiro[pyrrolidine-3,2'-pyrrolo[3,4-*b*]pyridine]-5,7'(1*H*)-dione (5d).** The general

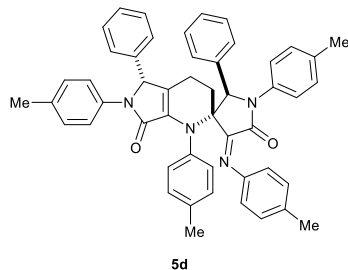

5d

procedure was applied starting from (5-oxo-2-phenyl-1-(*p*-tolyl)-4-(*p*-tolylamino)-2,5-dihydro-1*H*-pyrrol-3-yl)methyl acetate **3d** (0.451 g, 1 mmol) to afford 0.322 g (44%) of **5d** as a yellow oil after chromatography (Hexanes/ AcOEt 9:1). <sup>1</sup>H NMR (400 MHz, CDCl<sub>3</sub>)  $\delta$  7.68–6.80 (m, 24H, 24 $\times$ CH<sub>Ar</sub>), 6.30 (d, <sup>3</sup>J<sub>HH</sub> = 8.2 Hz, 2H, 2 $\times$ CH<sub>Ar</sub>), 5.52 (s, 1H, CH), 4.94 (s, 1H, CH), 2.54–2.05 (m, 2H, CH<sub>2</sub>), 2.35 (s, 3H, CH<sub>3Tol</sub>), 2.28 (s, 3H, CH<sub>3Tol</sub>), 2.24 (s, 3H, CH<sub>3Tol</sub>), 2.20 (s, 3H, CH<sub>3Tol</sub>), 1.67 (m, 1H, CH<sub>A</sub>CH<sub>B</sub>), 1.47 (m, 1H, CH<sub>A</sub>CH<sub>B</sub>) ppm. <sup>13</sup>C NMR {<sup>1</sup>H} (101 MHz, CDCl<sub>3</sub>)  $\delta$  166.2 (C<sub>quat</sub>), 161.2 (C<sub>quat</sub>), 157.6 (C<sub>quat</sub>), 146.2 (C<sub>quat</sub>), 140.4 (C<sub>quat</sub>), 137.8 (C<sub>quat</sub>), 136.8 (C<sub>quat</sub>), 136.5 (C<sub>quat</sub>), 135.9 (C<sub>quat</sub>), 135.7 (C<sub>quat</sub>), 135.5 (C<sub>quat</sub>), 134.0 (C<sub>quat</sub>), 133.9 (C<sub>quat</sub>), 133.4 (C<sub>quat</sub>), 132.6 (C<sub>quat</sub>), 129.9 (2 $\times$ CH<sub>Ar</sub>), 129.8 (2 $\times$ CH<sub>Ar</sub>), 129.5 (CH<sub>Ar</sub>), 129.4 (2 $\times$ CH<sub>Ar</sub>), 129.3 (2 $\times$ CH<sub>Ar</sub>), 129.2 (2 $\times$ CH<sub>Ar</sub>), 129.1 (CH<sub>Ar</sub>),

128.8 (2×CH<sub>Ar</sub>), 128.7 (2×CH<sub>Ar</sub>), 128.2 (2×CH<sub>Ar</sub>), 126.1 (2×CH<sub>Ar</sub>), 121.6 (2×CH<sub>Ar</sub>), 120.1 (2×CH<sub>Ar</sub>), 117.6 (2×CH<sub>Ar</sub>), 72.3 (CH), 66.9 (C<sub>quat</sub>), 65.0 (CH), 24.5 (CH<sub>2</sub>), 21.1 (CH<sub>3</sub>Tol), 21.0 (CH<sub>3</sub>Tol), 20.9 (CH<sub>3</sub>Tol), 20.7 (CH<sub>3</sub>Tol), 18.1 (CH<sub>2</sub>) ppm. FTIR (neat) ν<sub>max</sub>: 1698 (C=O<sub>st</sub>), 1669 (C=N<sub>st</sub>), 1628 (C=C<sub>st</sub>) cm<sup>-1</sup>. HRMS (ESI-TOF) m/z: [M+H]<sup>+</sup> calcd for C<sub>50</sub>H<sub>45</sub>N<sub>4</sub>O<sub>2</sub> 733.3543, found 733.3537.

**(2*R*\*,5*R*\*,*Z*)-1,1',6'-tris(4-methoxyphenyl)-4-((4-methoxyphenyl)imino)-2,5'-diphenyl-3',4',5',6'-tetrahydrospiro[pyrrolidine-3,2'-pyrrolo[3,4-*b*]pyridine]-5,7'(1'*H*)-dione (5f).** The general

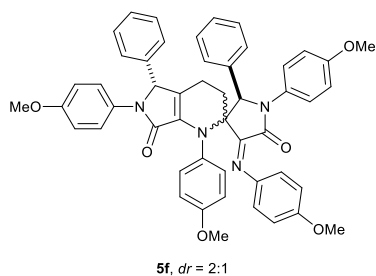

procedure was applied using 4-((dimethylamino)methyl)-1-(4-methoxyphenyl)-3-((4-methoxyphenyl)amino)-5-phenyl-1,5-dihydro-2*H*-pyrrol-2-one **2f** (0.444 g, 1 mmol) to afford 0.331 g (42%) of **5f** as a 2:1 mixture of the homodimer (2*R*\*,3*R*\*,5'*R*\*,*Z*) and heterodimer (2*R*\*,3*R*\*,5'*S*\*,*Z*) as an orange oil after chromatography (Hexanes/ AcOEt 9:1). <sup>1</sup>H NMR (400 MHz, CDCl<sub>3</sub>) δ 7.55–7.13 (m, 24H, 24×CH<sub>Ar</sub>), 6.93–6.66 (m, 12H, 12×CH<sub>Ar</sub>), 6.61

(d, <sup>3</sup>J<sub>HH</sub> = 8.7 Hz, 1H, 2×CH<sub>Ar</sub> Minor), 6.53 (d, <sup>3</sup>J<sub>HH</sub> = 8.7 Hz, 2H, 2×CH<sub>Ar</sub> Major), 5.49 (s, 1H, CH Major), 5.46 (s, 0.5H, CH Minor), 5.21 (s, 0.5H, CH Minor), 4.90 (s, 1H, CH Major), 3.80 (s, 1.5H, OCH<sub>3</sub> Minor), 3.78 (s, 3H, OCH<sub>3</sub> Major), 3.78 (s, 1.5H, OCH<sub>3</sub> Minor), 3.76 (s, 3H, OCH<sub>3</sub> Major), 3.73 (s, 3H, OCH<sub>3</sub> Major), 3.71 (s, 1.5H, OCH<sub>3</sub> Minor), 3.69 (s, 3H, OCH<sub>3</sub> Major), 3.69 (s, 1.5H, OCH<sub>3</sub> Minor), 2.47–2.20 (m, 2H, CH<sub>2</sub> Major), 2.12–1.89 (m, 2H, CH<sub>2</sub> Major), 1.72–1.59 (m, 1H, CH<sub>2</sub> Minor), 1.56–1.42 (m, 1H, CH<sub>2</sub> Minor) ppm. <sup>13</sup>C NMR {<sup>1</sup>H} (101 MHz, CDCl<sub>3</sub>) δ 166.2 (C<sub>quat</sub> Major), 166.1 (C<sub>quat</sub> Minor), 160.8 (C<sub>quat</sub> Minor), 160.7 (C<sub>quat</sub> Major), 158.6 (C<sub>quat</sub> Minor), 158.5 (C<sub>quat</sub> Major), 157.9 (C<sub>quat</sub> Major), 157.8 (C<sub>quat</sub>-Minor), 157.8 (C<sub>quat</sub> Major), 157.7 (C<sub>quat</sub> Minor), 157.3 (C<sub>quat</sub> Minor), 157.3 (C<sub>quat</sub> Major), 156.4 (C<sub>quat</sub> Minor), 156.2 (C<sub>quat</sub> Major), 141.4 (C<sub>quat</sub> Major), 141.2 (C<sub>quat</sub> Minor), 137.7 (C<sub>quat</sub> Major), 137.2 (C<sub>quat</sub> Minor), 136.8 (C<sub>quat</sub> Minor), 136.6 (C<sub>quat</sub> Major), 136.0 (C<sub>quat</sub> Major), 134.9 (C<sub>quat</sub> Minor), 134.2 (C<sub>quat</sub> Major), 132.3 (C<sub>quat</sub> Major), 131.4 (C<sub>quat</sub> Major), 131.3 (C<sub>quat</sub> Major), 131.1 (C<sub>quat</sub> Minor), 131.1 (C<sub>quat</sub> Minor), 129.8 (C<sub>quat</sub> Minor), 129.5 (2×CH<sub>Ar</sub> Major), 129.2 (2×CH<sub>Ar</sub> Minor), 129.0 (CH<sub>Ar</sub> Minor), 128.9 (CH<sub>Ar</sub> Major), 128.4 (CH<sub>Ar</sub> Minor), 128.3 (CH<sub>Ar</sub> Major), 127.1 (2×CH<sub>Ar</sub> Minor), 126.3 (2×CH<sub>Ar</sub> Major), 123.8 (2×CH<sub>Ar</sub> Minor), 123.7 (2×CH<sub>Ar</sub> Major), 123.1 (2×CH<sub>Ar</sub> Minor), 122.3 (2×CH<sub>Ar</sub> Major), 120.8 (2×CH<sub>Ar</sub> Minor), 120.3 (2×CH<sub>Ar</sub> Major), 114.4 (CH<sub>Ar</sub> Major + CH<sub>Ar</sub> Minor), 114.1 (2×CH<sub>Ar</sub> Major), 114.0 (2×CH<sub>Ar</sub> Minor), 114.0 (2×CH<sub>Ar</sub> Major), 113.9 (2×CH<sub>Ar</sub> Minor), 113.5 (2×CH<sub>Ar</sub> Major), 113.5 (2×CH<sub>Ar</sub> Minor), 72.9 (CH Major), 71.6 (CH Minor), 67.4 (C<sub>quat</sub> Major), 67.0 (C<sub>quat</sub> Minor), 65.6 (CH Major), 65.4 (CH Minor), 55.6 (OCH<sub>3</sub> Major), 55.5 (OCH<sub>3</sub> Minor), 55.5 (2×OCH<sub>3</sub> Minor), 55.5 (2×OCH<sub>3</sub> Major), 55.4 (OCH<sub>3</sub> Major), 55.4 (OCH<sub>3</sub> Minor), 24.8 (CH<sub>2</sub> Minor), 24.6 (CH<sub>2</sub> Major), 18.2 (CH<sub>2</sub> Major), 17.7 (CH<sub>2</sub> Minor) ppm. FTIR (neat) ν<sub>max</sub>: 1692 (C=O<sub>st</sub>), 1673 (C=N<sub>st</sub>), 1606 (C=C<sub>st</sub>) cm<sup>-1</sup>. HRMS (ESI-TOF) m/z: [M+H]<sup>+</sup> calcd for C<sub>50</sub>H<sub>45</sub>N<sub>4</sub>O<sub>6</sub> 797.3339, found 797.3301.

## IV. Crystallographic dato for 2a, 5a and 5b

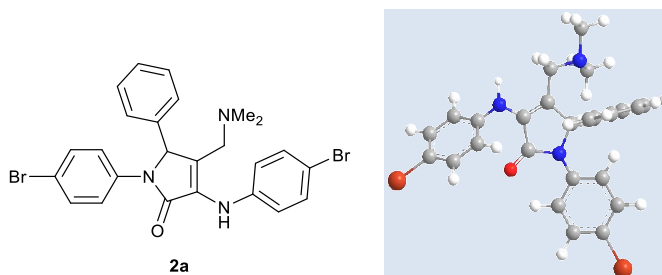

The structure of compound **2a** (b20220233\_AL637DUCu2) was determined on a crystal prepared from a Et<sub>2</sub>O/Pentane (1:3) solvent system by slow evaporation in a vial at room temperature. The X-ray data have been deposited at the Cambridge Crystallographic Data Centre (CCDC 2257284).

Intensity data were collected on an Agilent Technologies Super-Nova diffractometer, which was equipped with monochromated Cu  $\alpha$  radiation ( $\lambda = 1.54184 \text{ \AA}$ ) and de HyPix-6000H Hybrid Pixel Array Detector. Measurement was carried out at 151.0 (6) K with the help of an Oxford Cryostream 700 PLUS temperature device. Data frames were processed (unit cell determination, analytical absorption correction with face indexing, intensity data integration and correction for Lorentz and polarization effects) using the CrysAlis software package.<sup>2</sup> The structure was solved using SHELXT<sup>3</sup> and refined by full-matrix least-squares with SHELXL-97.<sup>4</sup> Final geometrical calculations were carried out with Mercury<sup>5</sup> and PLATON<sup>6</sup> as integrated in WinGX<sup>7</sup> and Olex 2.

### Experimental

Single crystals of **2a**. A suitable crystal was selected and mounted on a SuperNova, Dual, Cu at home/near, HyPix diffractometer. The crystal was kept at 170.01(10) K during data collection. Using Olex2,<sup>8</sup> the structure was solved with the SHELXT<sup>3</sup> structure solution program using Intrinsic Phasing and refined with the SHELXL<sup>4</sup> refinement package using Least Squares minimisation.

<sup>2</sup> CrysAlisPro, Agilent Technologies, Version 1.171.37.31 (release 14-01-2014 CrysAlis171 .NET) (compiled Jan 14 2014,18:38:05).

<sup>3</sup> G. M. Sheldrick. SHELXT - Integrated space-group and crystal-structure determination. *Acta Cryst.*, 2015, **A71**, 3-8. <https://doi.org/10.1107/S2053273314026370>.

<sup>4</sup> a). G. M. Sheldrick. A short history of SHELX. *Acta Cryst.*, 2008, **A64**, 112-122. <https://doi.org/10.1107/S0108767307043930> b). G. M. Sheldrick. Crystal structure refinement with SHELXL. *Acta Cryst.*, 2015, **C71**, 3-8. <https://doi.org/10.1107/S2053229614024218>.

<sup>5</sup> C. F. Macrae. Mercury CSD 2.0 – new features for the visualization and investigation of crystal structures. *J. Appl. Crystallogr.*, 2008, **41**, 466-470. <https://doi.org/10.1107/S0021889807067908>.

<sup>6</sup> A. L. Spek. Single-crystal structure validation with the program PLATON. *J. Appl. Cryst.*, 2003, **36**, 7-13. <https://doi.org/10.1107/S0021889802022112>.

<sup>7</sup> L. J. Farrugia. WinGX suite for small-molecule single-crystal crystallography. *J. Appl. Cryst.*, 1999, **32**, 837-838. <https://doi.org/10.1107/S0021889899006020>.

<sup>8</sup> O. V. Dolomanov, L. J. Bourhis, R. J. Gildea, J. A. K. Howard and H. Puschmann. OLEX2: A Complete Structure Solution, Refinement and Analysis Program. *J. Appl. Cryst.*, 2009, **42**, 339-341. <https://doi.org/10.1107/S0021889808042726>.



## Crystal structure determination of 2a

**Crystal Data** for  $C_{25}H_{23}Br_2N_3O$  ( $M = 541.28$  g/mol): triclinic, space group P-1 (no. 2),  $a = 13.2465(6)$  Å,  $b = 13.4713(5)$  Å,  $c = 15.1339(4)$  Å,  $\alpha = 100.978(3)^\circ$ ,  $\beta = 98.736(3)^\circ$ ,  $\gamma = 115.947(4)^\circ$ ,  $V = 2297.76(15)$  Å<sup>3</sup>,  $Z = 4$ ,  $T = 170.01(10)$  K,  $\mu(\text{CuK}\alpha) = 4.642$  mm<sup>-1</sup>,  $D_{\text{calc}} = 1.565$  g/cm<sup>3</sup>, 45213 reflections measured ( $6.172^\circ \leq 2\theta \leq 137.996^\circ$ ), 8531 unique ( $R_{\text{int}} = 0.0634$ ,  $R_{\text{sigma}} = 0.0408$ ) which were used in all calculations. The final  $R_1$  was 0.0654 ( $I > 2\sigma(I)$ ) and  $wR_2$  was 0.2027 (all data).

## Thermal ellipsoid plot/ORTEP for compound 2a. Contour probability level: 50%

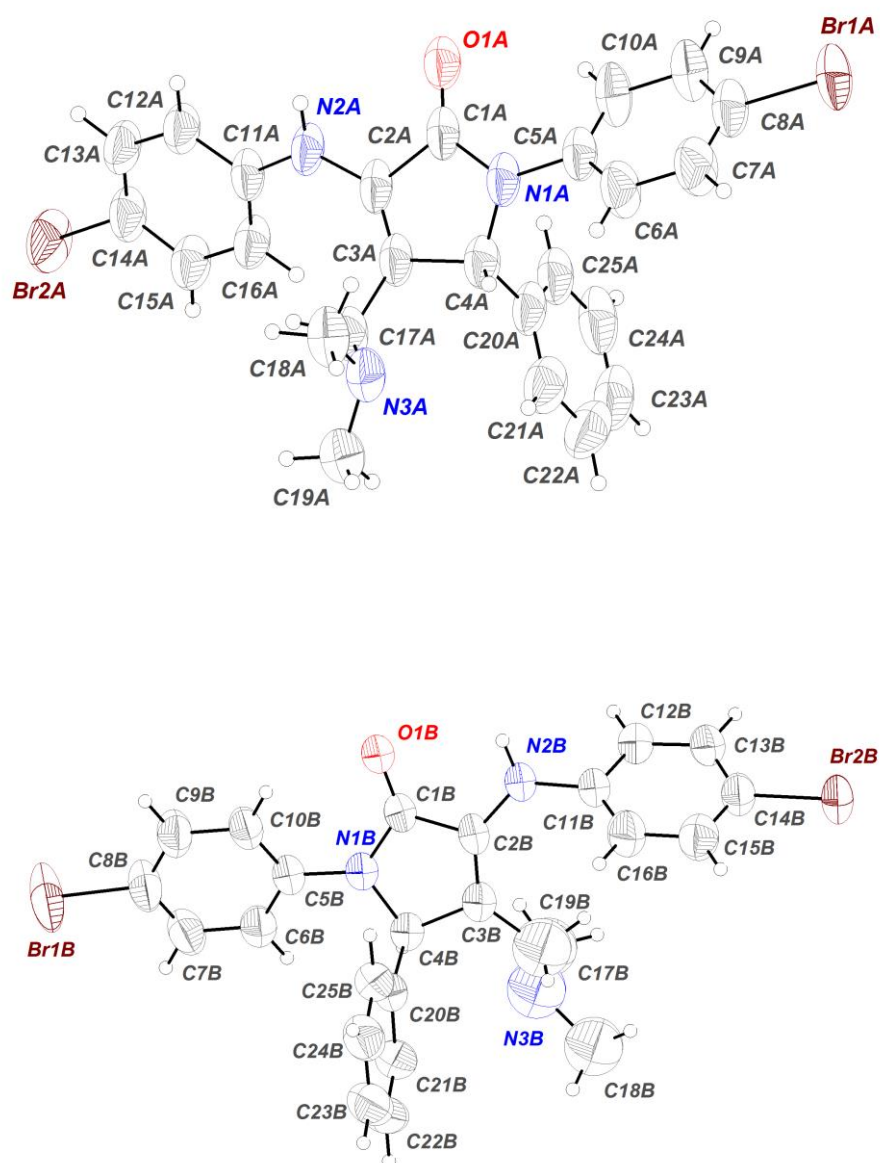

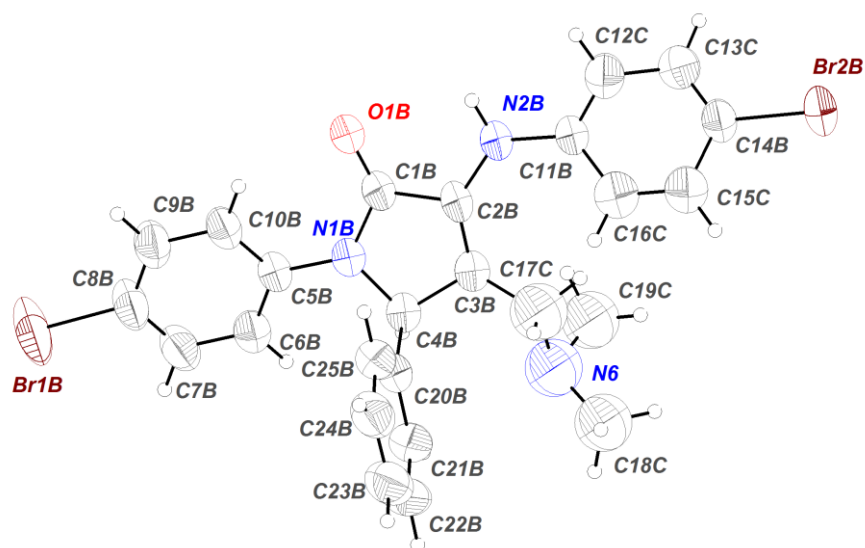

**Table S2. Crystal data and structure refinement for 2a.**

|                                    |                                                                  |
|------------------------------------|------------------------------------------------------------------|
| Identification code                | b20220233_AL637DUCu2                                             |
| Empirical formula                  | C <sub>25</sub> H <sub>23</sub> Br <sub>2</sub> N <sub>3</sub> O |
| Formula weight                     | 541.28                                                           |
| Temperature/K                      | 170.01(10)                                                       |
| Crystal system                     | triclinic                                                        |
| Space group                        | P-1                                                              |
| a/Å                                | 13.2465(6)                                                       |
| b/Å                                | 13.4713(5)                                                       |
| c/Å                                | 15.1339(4)                                                       |
| α/°                                | 100.978(3)                                                       |
| β/°                                | 98.736(3)                                                        |
| γ/°                                | 115.947(4)                                                       |
| Volume/Å <sup>3</sup>              | 2297.76(15)                                                      |
| Z                                  | 4                                                                |
| ρ <sub>calc</sub> /cm <sup>3</sup> | 1.565                                                            |
| μ/mm <sup>-1</sup>                 | 4.642                                                            |
| F(000)                             | 1088.0                                                           |
| Crystal size/mm <sup>3</sup>       | 0.26 × 0.13 × 0.108                                              |
| Radiation                          | CuKα (λ = 1.54184)                                               |
| 2θ range for data collection/°     | 6.172 to 137.996                                                 |
| Index ranges                       | -16 ≤ h ≤ 14, -16 ≤ k ≤ 16, -18 ≤ l ≤ 18                         |
| Reflections collected              | 45213                                                            |
| Independent reflections            | 8531 [R <sub>int</sub> = 0.0634, R <sub>sigma</sub> = 0.0408]    |
| Data/restraints/parameters         | 8531/118/610                                                     |
| Goodness-of-fit on F <sup>2</sup>  | 1.067                                                            |

Final R indexes [ $I \geq 2\sigma(I)$ ]

R1 = 0.0654, wR2 = 0.1828

Final R indexes [all data]

R1 = 0.0885, wR2 = 0.2027

Largest diff. peak/hole /  $e \text{ \AA}^{-3}$

0.92/-0.76

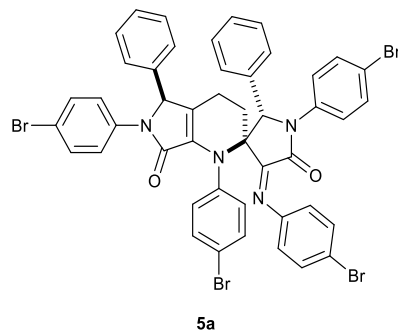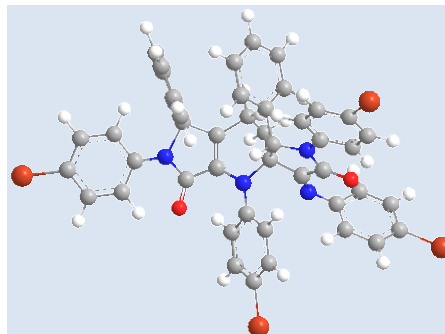

The structure of compound **5a** (b20210012\_AL467DUCu\_auto) was determined on a crystal prepared from a Et<sub>2</sub>O/Pentane (1:3) solvent system by slow evaporation in a vial at room temperature. The X-ray data have been deposited at the Cambridge Crystallographic Data Centre (CCDC 2125934).

Intensity data were collected on an Agilent Technologies Super-Nova diffractometer, which was equipped with monochromated Cu  $\alpha$  radiation ( $\lambda = 1.54184 \text{ \AA}$ ) and de HyPix-6000H Hybrid Pixel Array Detector. Measurement was carried out at 151.0 (6) K with the help of an Oxford Cryostream 700 PLUS temperature device. Data frames were processed (unit cell determination, analytical absorption correction with face indexing, intensity data integration and correction for Lorentz and polarization effects) using the CrysAlis software package.<sup>2</sup> The structure was solved using SHELXT<sup>3</sup> and refined by full-matrix least-squares with SHELXL-97.<sup>4</sup> Final geometrical calculations were carried out with Mercury<sup>5</sup> and PLATON<sup>6</sup> as integrated in WinGX<sup>7</sup> and Olex 2. The asymmetric unit has two crystallization water molecules. These molecules are highly disordered and it has been impossible to make a model that results in a better according factor than if a squeeze is done eliminating the unassigned electron density, for this reason this model has been chosen.

## Experimental

Single crystal of **5a**. A suitable crystal was selected and mounted on a SuperNova, Dual, Cu at home/near, HyPix diffractometer. The crystal was kept at 151.0(6) K during data collection. Using Olex2,<sup>8</sup> the structure was solved with the SHELXT<sup>3</sup> structure solution program using Intrinsic Phasing and refined with the SHELXL<sup>4</sup> refinement package using Least Squares minimisation.

### Crystal structure determination of **5a**.

**Crystal Data** for C<sub>46</sub>H<sub>32</sub>Br<sub>4</sub>N<sub>4</sub>O<sub>2</sub> ( $M = 992.39 \text{ g/mol}$ ): triclinic, space group P-1 (no. 2),  $a = 13.0370(2) \text{ \AA}$ ,  $b = 14.7579(2) \text{ \AA}$ ,  $c = 23.6102(3) \text{ \AA}$ ,  $\alpha = 99.1840(10)^\circ$ ,  $\beta = 102.460(2)^\circ$ ,  $\gamma = 99.4360(10)^\circ$ ,  $V = 4284.98(11) \text{ \AA}^3$ ,  $Z = 4$ ,  $T = 151.4(6) \text{ K}$ ,  $\mu(\text{CuK}\alpha) = 4.915 \text{ mm}^{-1}$ ,  $D_{\text{calc}} = 1.538 \text{ g/cm}^3$ , 85326 reflections measured ( $6.2^\circ \leq 2\theta \leq 137.988^\circ$ ), 15665 unique ( $R_{\text{int}} = 0.0750$ ,  $R_{\text{sigma}}$

= 0.0464) which were used in all calculations. The final  $R1$  was 0.0520 ( $I > 2\sigma(I)$ ) and  $wR2$  was 0.1577 (all data).

**Thermal ellipsoid plot/ORTEP for compound 5a. Contour probability level: 50%**

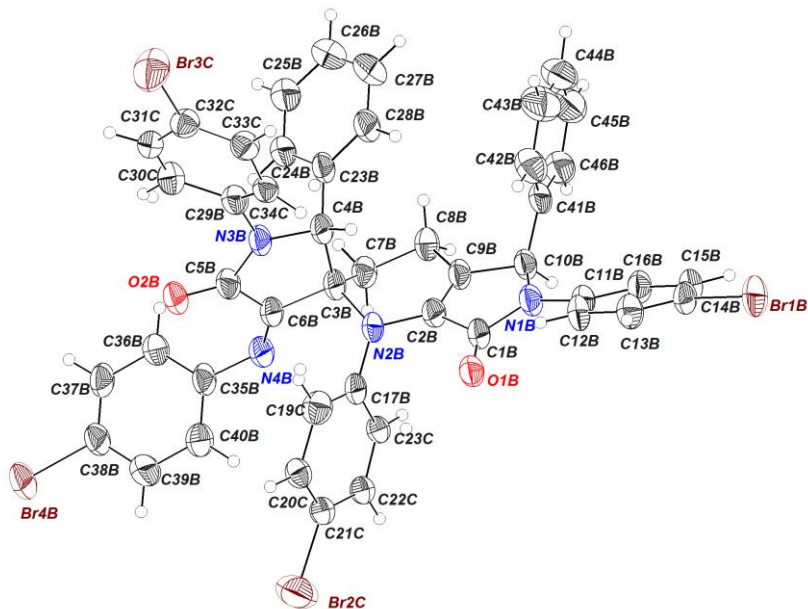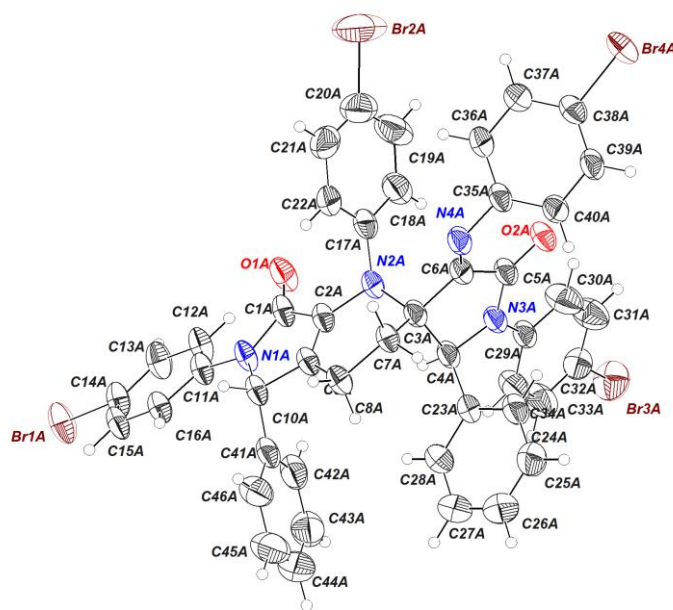

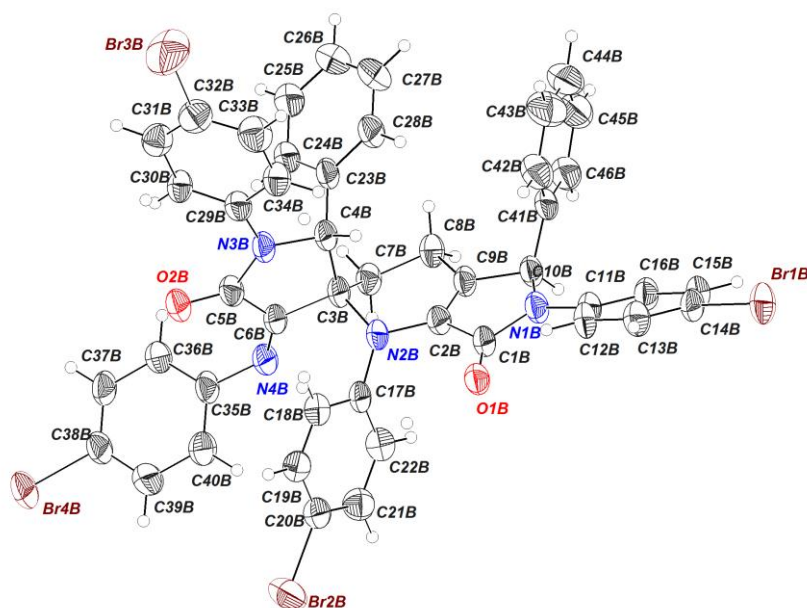

**Table S3. Crystal data and structure refinement for 5a.**

|                                    |                                                                               |
|------------------------------------|-------------------------------------------------------------------------------|
| Identification code                | b20210012_AL467DUCu_auto                                                      |
| Empirical formula                  | C <sub>46</sub> H <sub>32</sub> Br <sub>4</sub> N <sub>4</sub> O <sub>2</sub> |
| Formula weight                     | 992.39                                                                        |
| Temperature/K                      | 151.4(6)                                                                      |
| Crystal system                     | triclinic                                                                     |
| Space group                        | P-1                                                                           |
| a/Å                                | 13.0370(2)                                                                    |
| b/Å                                | 14.7579(2)                                                                    |
| c/Å                                | 23.6102(3)                                                                    |
| α/°                                | 99.1840(10)                                                                   |
| β/°                                | 102.460(2)                                                                    |
| γ/°                                | 99.4360(10)                                                                   |
| Volume/Å <sup>3</sup>              | 4284.98(11)                                                                   |
| Z                                  | 4                                                                             |
| ρ <sub>calc</sub> /cm <sup>3</sup> | 1.538                                                                         |
| μ/mm <sup>-1</sup>                 | 4.915                                                                         |
| F(000)                             | 1968.0                                                                        |
| Crystal size/mm <sup>3</sup>       | 0.377 × 0.202 × 0.08                                                          |
| Radiation                          | CuKα (λ = 1.54184)                                                            |
| 2θ range for data collection/°     | 6.2 to 137.988                                                                |
| Index ranges                       | -14 ≤ h ≤ 15, -17 ≤ k ≤ 17, -28 ≤ l ≤ 28                                      |
| Reflections collected              | 85326                                                                         |
| Independent reflections            | 15665 [R <sub>int</sub> = 0.0750, R <sub>sigma</sub> = 0.0464]                |
| Data/restraints/parameters         | 15665/144/1113                                                                |
| Goodness-of-fit on F <sup>2</sup>  | 1.081                                                                         |

Final R indexes [ $I \geq 2\sigma(I)$ ]

R1 = 0.0520, wR2 = 0.1446

Final R indexes [all data]

R1 = 0.0679, wR2 = 0.1577

Largest diff. peak/hole /  $e \text{ \AA}^{-3}$

1.54/-1.03

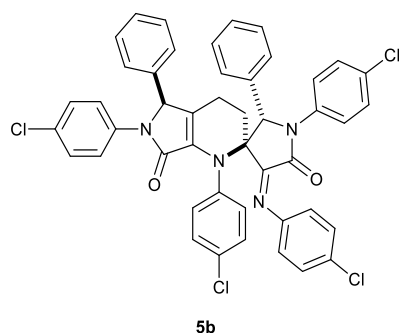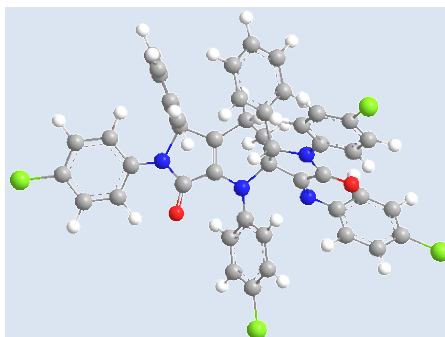

The structure of compound **5b** (b20220253\_AL649Et2ODDUCu) was determined on a crystal prepared from a  $\text{CDCl}_3$  solvent system by slow evaporation in a vial at room temperature. The X-ray data have been deposited at the Cambridge Crystallographic Data Centre (CCDC 2257535).

Intensity data were collected on an Agilent Technologies Super-Nova diffractometer, which was equipped with monochromated  $\text{Cu } \alpha$  radiation ( $\lambda = 1.54184 \text{ \AA}$ ) and de HyPix-6000H Hybrid Pixel Array Detector. Measurement was carried out at 151.0 (6) K with the help of an Oxford Cryostream 700 PLUS temperature device. Data frames were processed (unit cell determination, analytical absorption correction with face indexing, intensity data integration and correction for Lorentz and polarization effects) using the CrysAlis software package.<sup>2</sup> The structure was solved using SHELXT<sup>3</sup> and refined by full-matrix least-squares with SHELXL-97.<sup>4</sup> Final geometrical calculations were carried out with Mercury<sup>5</sup> and PLATON<sup>6</sup> as integrated in WinGX.<sup>7</sup> and Olex 2.

## Experimental

Single crystal of **5b**. A suitable crystal was selected and mounted on a SuperNova, Dual, Cu at home/near, HyPix diffractometer. The crystal was kept at 151.0(6) K during data collection. Using Olex2,<sup>8</sup> the structure was solved with the SHELXT<sup>3</sup> structure solution program using Intrinsic Phasing and refined with the SHELXL<sup>4</sup> refinement package using Least Squares minimisation.

## Crystal structure determination of 5b.

**Crystal Data** for  $\text{C}_{46}\text{H}_{32}\text{Cl}_4\text{N}_4\text{O}_2$  ( $M = 814.55 \text{ g/mol}$ ): monoclinic, space group P21/c (no. 14),  $a = 12.4973(4) \text{ \AA}$ ,  $b = 13.4524(4) \text{ \AA}$ ,  $c = 23.6777(8) \text{ \AA}$ ,  $\beta = 101.817(3)^\circ$ ,  $V = 3896.3(2) \text{ \AA}^3$ ,  $Z = 4$ ,  $T = 170.01(10) \text{ K}$ ,  $\mu(\text{Cu}\alpha) = 3.125 \text{ mm}^{-1}$ ,  $D_{\text{calc}} = 1.389 \text{ g/cm}^3$ , 49188 reflections measured ( $7.226^\circ \leq 2\theta \leq 137.986^\circ$ ), 7243 unique ( $R_{\text{int}} = 0.0969$ ,  $R_{\text{sigma}} = 0.0745$ ) which were used in all calculations. The final R1 was 0.0560 ( $I > 2\sigma(I)$ ) and wR2 was 0.1747 (all data).

Thermal ellipsoid plot/ORTEP for compound 5b. Contour probability level: 50%

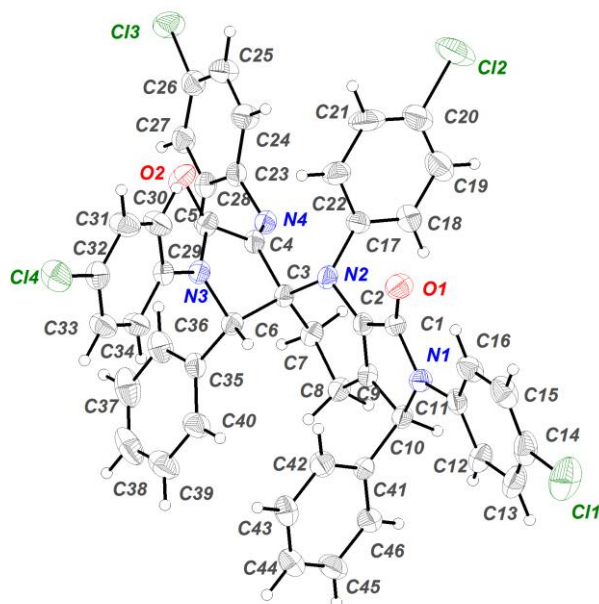

Table S4. Crystal data and structure refinement for 5b.

|                                    |                                                                               |
|------------------------------------|-------------------------------------------------------------------------------|
| Identification code                | b20220253_AL649Et2ODDUCu                                                      |
| Empirical formula                  | C <sub>46</sub> H <sub>32</sub> Cl <sub>4</sub> N <sub>4</sub> O <sub>2</sub> |
| Formula weight                     | 814.55                                                                        |
| Temperature/K                      | 170.01(10)                                                                    |
| Crystal system                     | monoclinic                                                                    |
| Space group                        | P2 <sub>1</sub> /c                                                            |
| a/Å                                | 12.4973(4)                                                                    |
| b/Å                                | 13.4524(4)                                                                    |
| c/Å                                | 23.6777(8)                                                                    |
| α/°                                | 90.0                                                                          |
| β/°                                | 101.817(3)                                                                    |
| γ/°                                | 90.0                                                                          |
| Volume/Å <sup>3</sup>              | 3896.3(2)                                                                     |
| Z                                  | 4                                                                             |
| ρ <sub>calc</sub> /cm <sup>3</sup> | 1.389                                                                         |
| μ/mm <sup>-1</sup>                 | 3.125                                                                         |
| F(000)                             | 1680.0                                                                        |
| Crystal size/mm <sup>3</sup>       | 0.140 × 0.103 × 0.053                                                         |
| Radiation                          | CuKα (λ = 1.54184)                                                            |
| 2θ range for data collection/°     | 7.226 to 137.986                                                              |
| Index ranges                       | -14 ≤ h ≤ 15, -16 ≤ k ≤ 16, -28 ≤ l ≤ 28                                      |
| Reflections collected              | 49188                                                                         |
| Independent reflections            | 7243 [R <sub>int</sub> = 0.0969, R <sub>sigma</sub> = 0.0745]                 |

|                                               |                           |
|-----------------------------------------------|---------------------------|
| Data/restraints/parameters                    | 7243/0/505                |
| Goodness-of-fit on F2                         | 1.050                     |
| Final R indexes [ $I \geq 2\sigma(I)$ ]       | R1 = 0.0560, wR2 = 0.1525 |
| Final R indexes [all data]                    | R1 = 0.0840, wR2 = 0.1747 |
| Largest diff. peak/hole / e $\text{\AA}^{-3}$ | 0.83/-0.99                |



## V. Copies of NMR spectra

### 1-(4-Bromophenyl)-3-((4-bromophenyl)amino)-5-phenyl-1,5-dihydro-2H-pyrrol-2-one (1a)

$^1\text{H}$  NMR (400 MHz,  $\text{CDCl}_3$ )

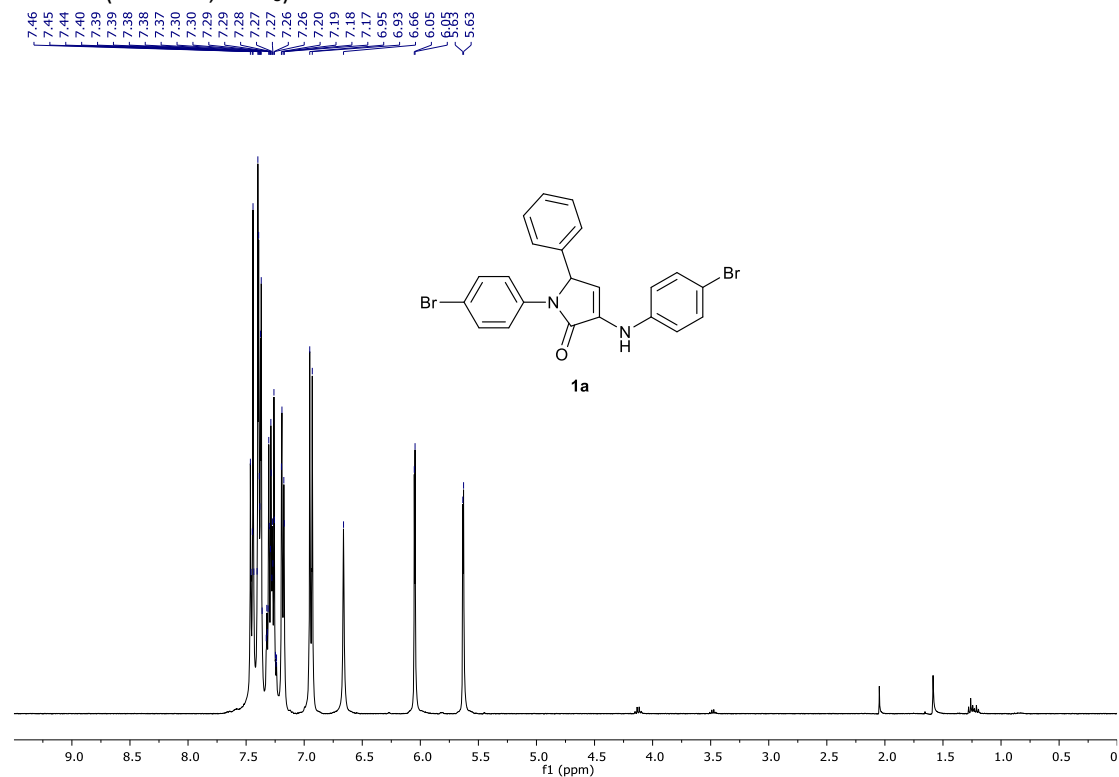

$^{13}\text{C}$  NMR  $\{^1\text{H}\}$  (101 MHz,  $\text{CDCl}_3$ )

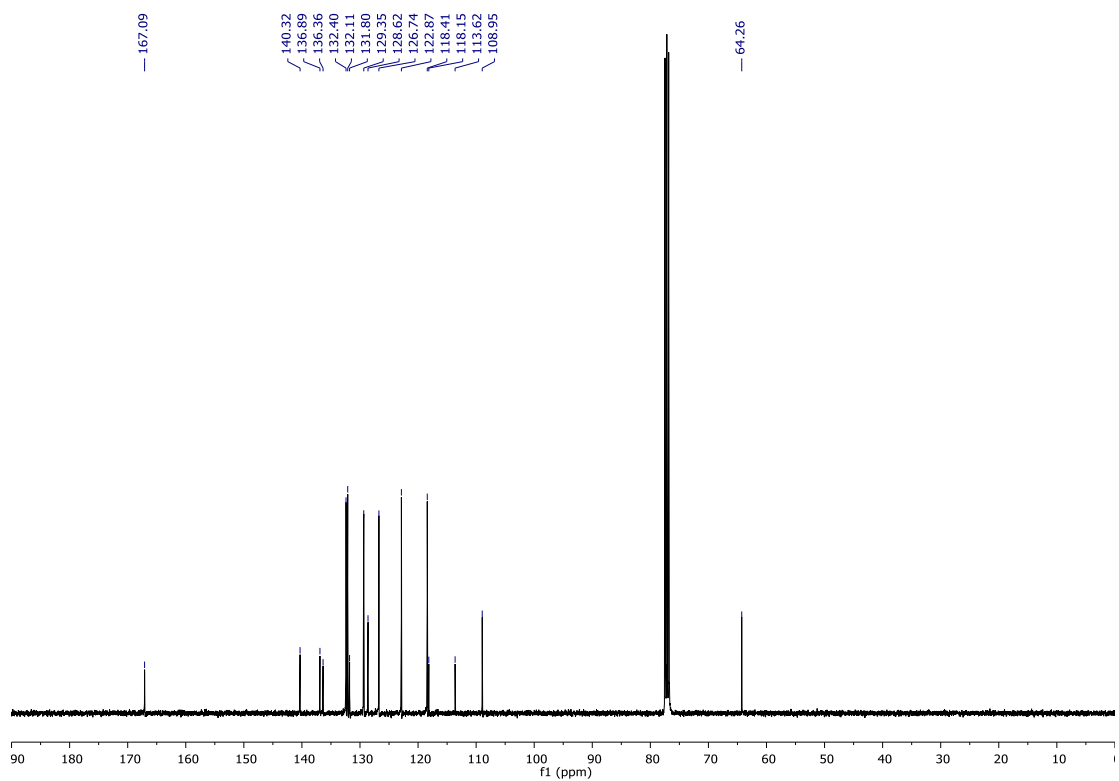

1-(4-Chlorophenyl)-3-((4-chlorophenyl)amino)-5-phenyl-1,5-dihydro-2H-pyrrol-2-one (1b)

$^1\text{H}$  NMR (400 MHz,  $\text{CDCl}_3$ )

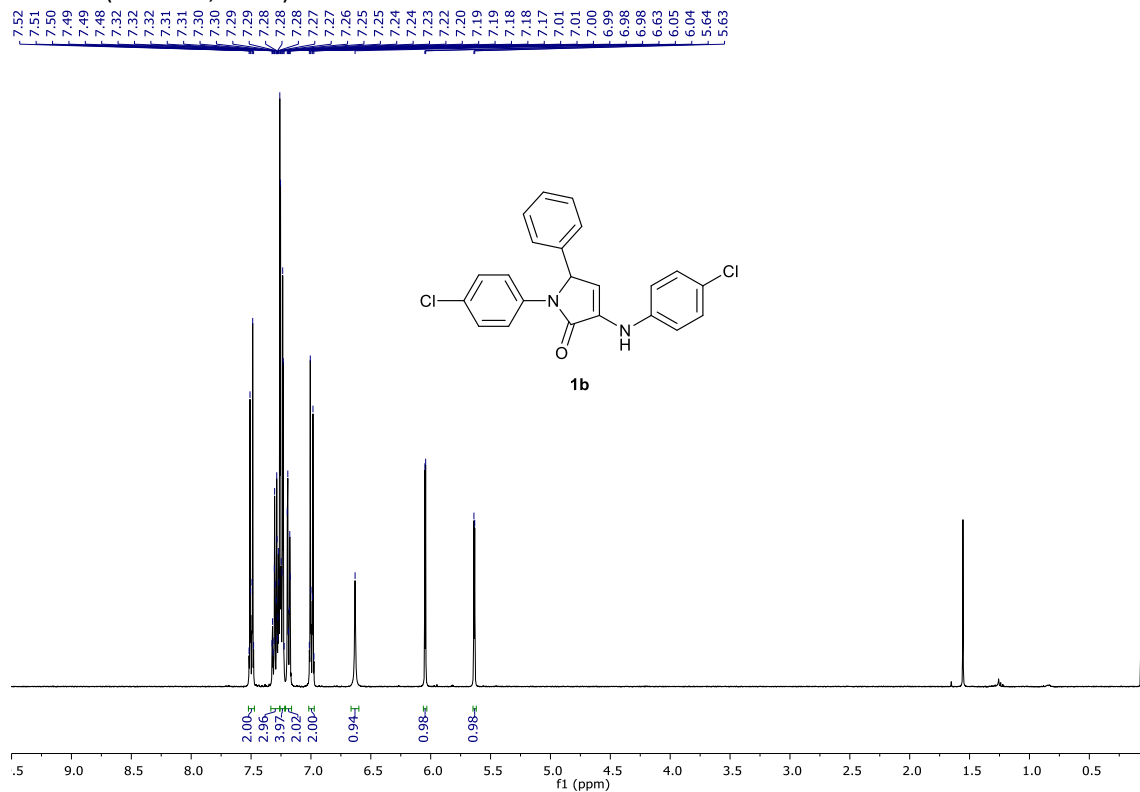

$^{13}\text{C}$  NMR [ $^1\text{H}$ ] (101 MHz,  $\text{CDCl}_3$ )

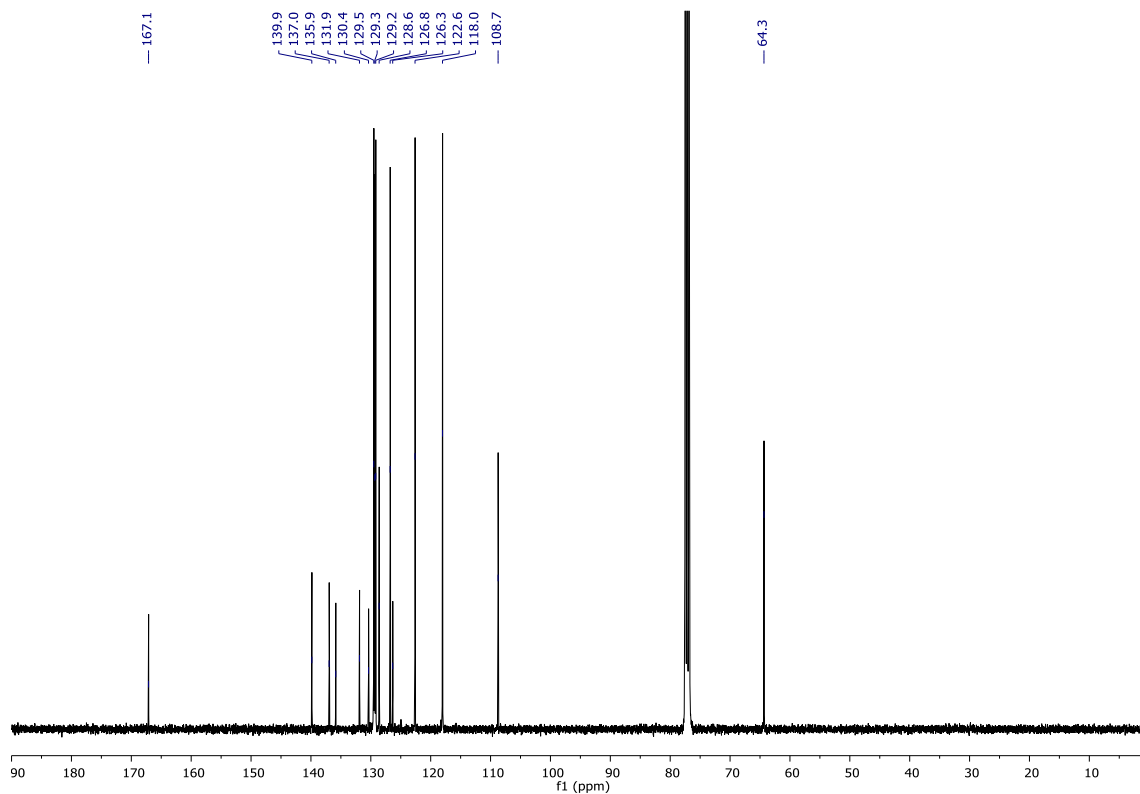

1-(4-Fluorophenyl)-3-((4-fluorophenyl)amino)-5-phenyl-1,5-dihydro-2H-pyrrol-2-one (1c)

<sup>1</sup>H NMR (400 MHz, CDCl<sub>3</sub>)

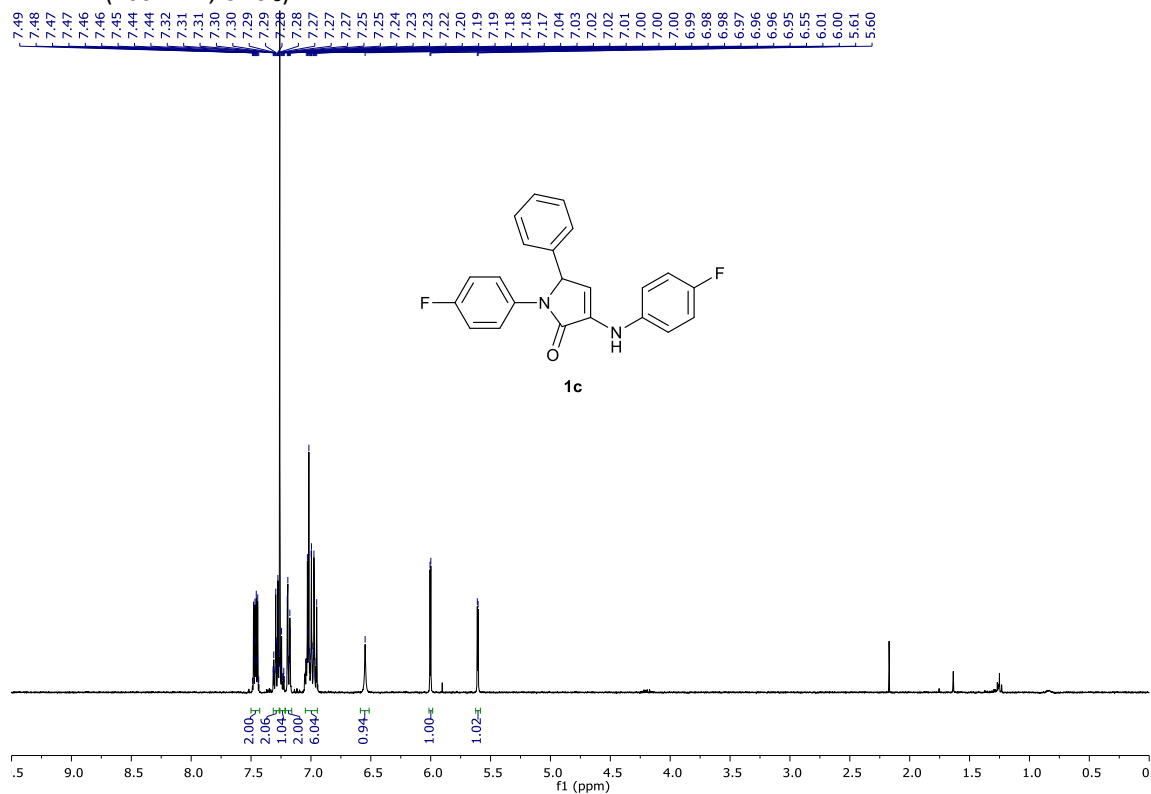

<sup>13</sup>C NMR {<sup>1</sup>H} (101 MHz, CDCl<sub>3</sub>)

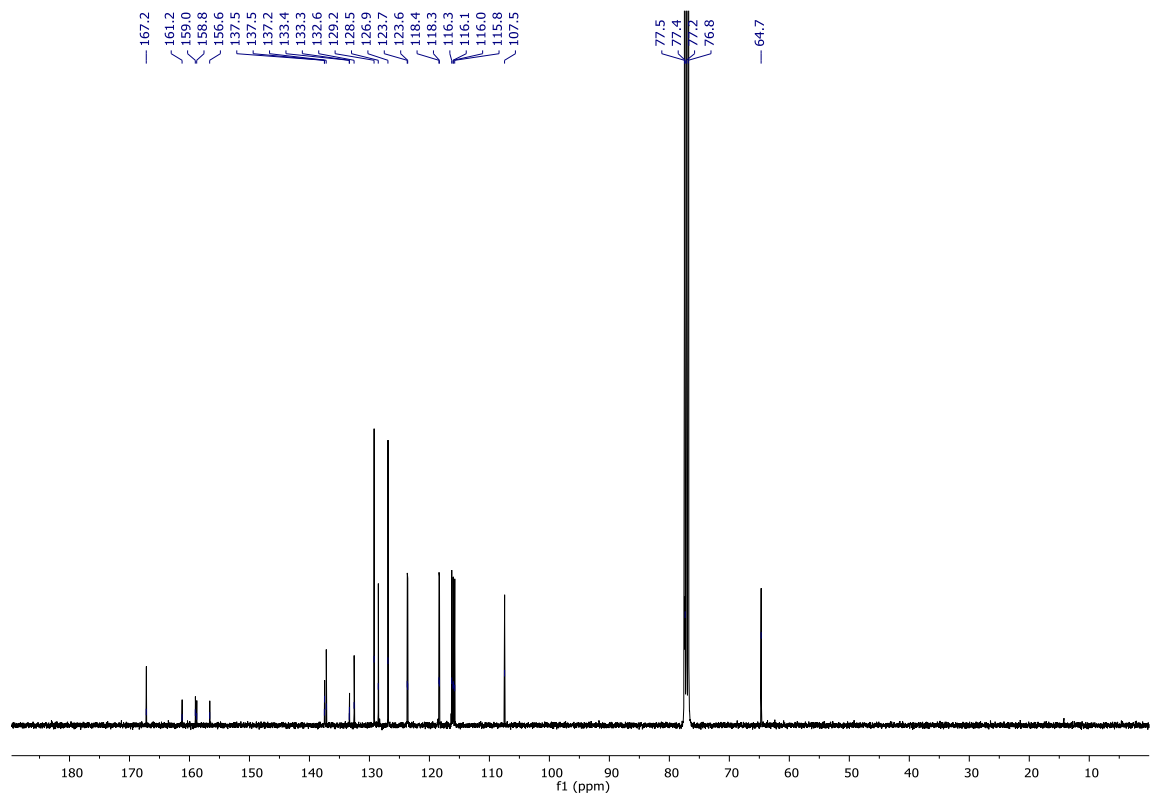

<sup>19</sup>F NMR {<sup>1</sup>H} (282 MHz, CDCl<sub>3</sub>)

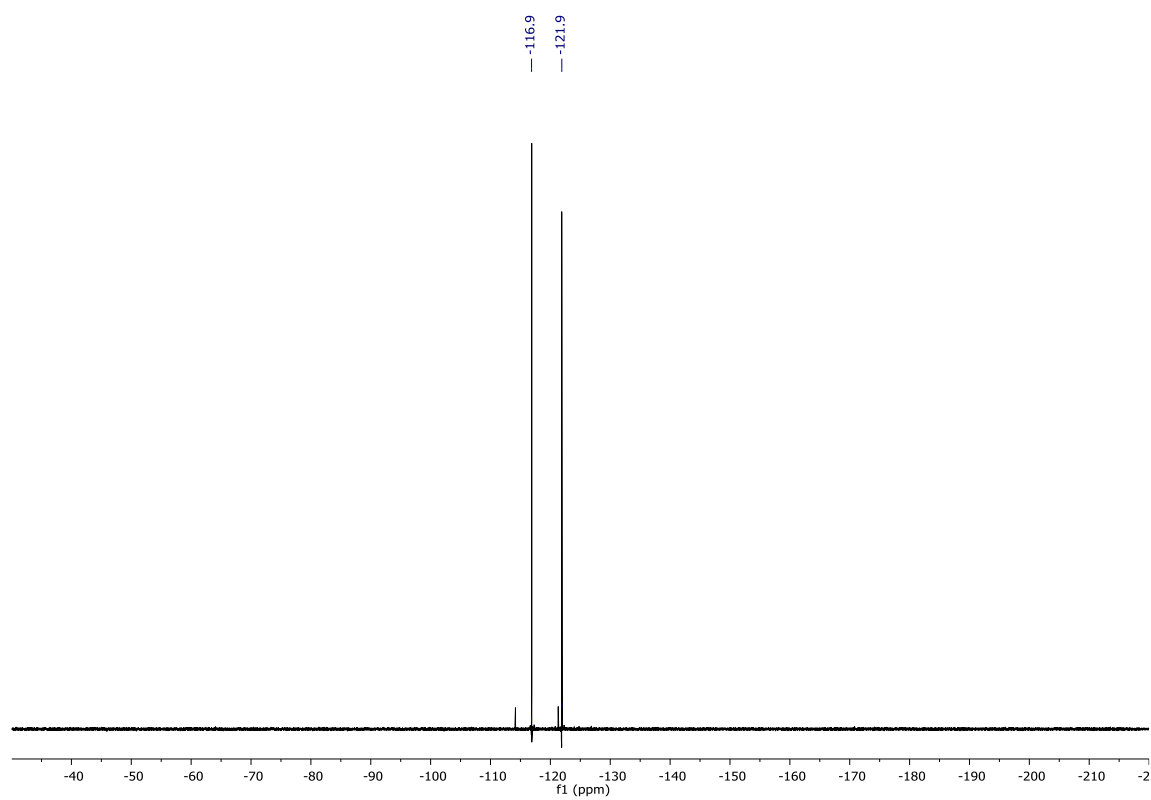

5-Phenyl-1-(*p*-tolyl)-3-(*p*-tolylamino)-1,5-dihydro-2*H*-pyrrol-2-one (**1d**).

$^1\text{H NMR}$  (400 MHz,  $\text{CDCl}_3$ )

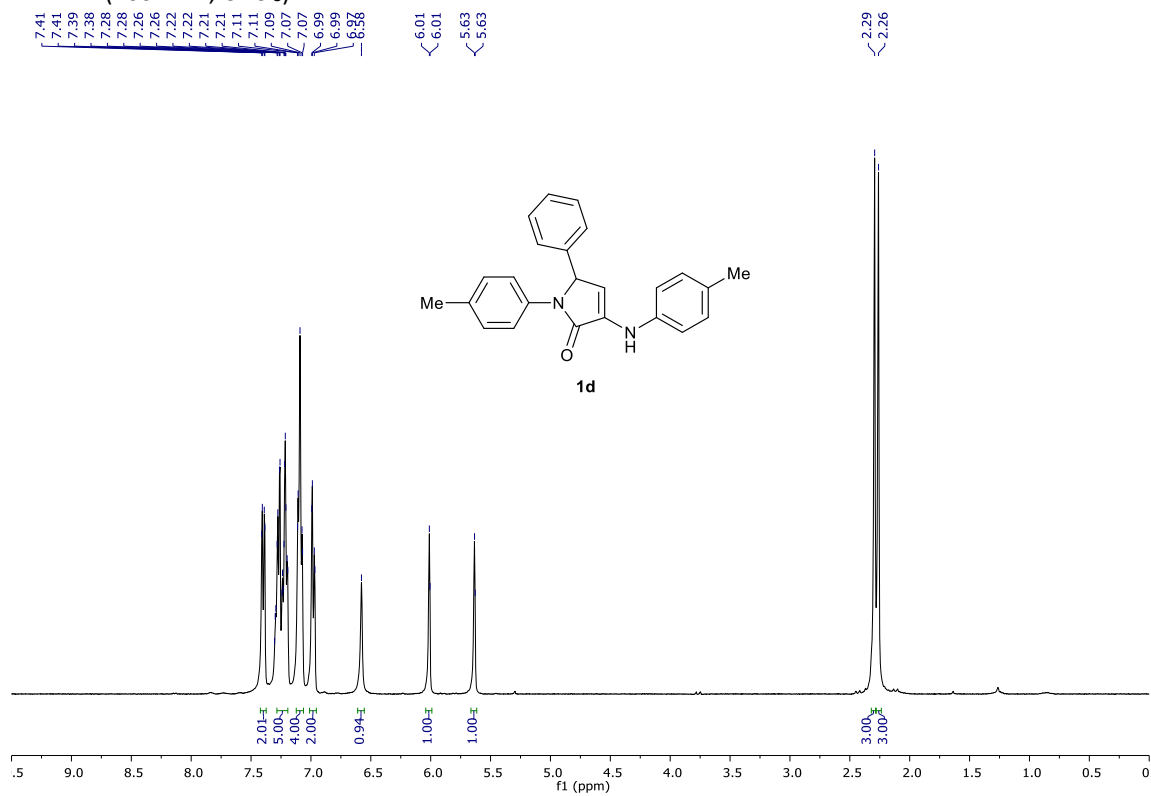

$^{13}\text{C NMR}$  [ $^1\text{H}$ ] (101 MHz,  $\text{CDCl}_3$ )

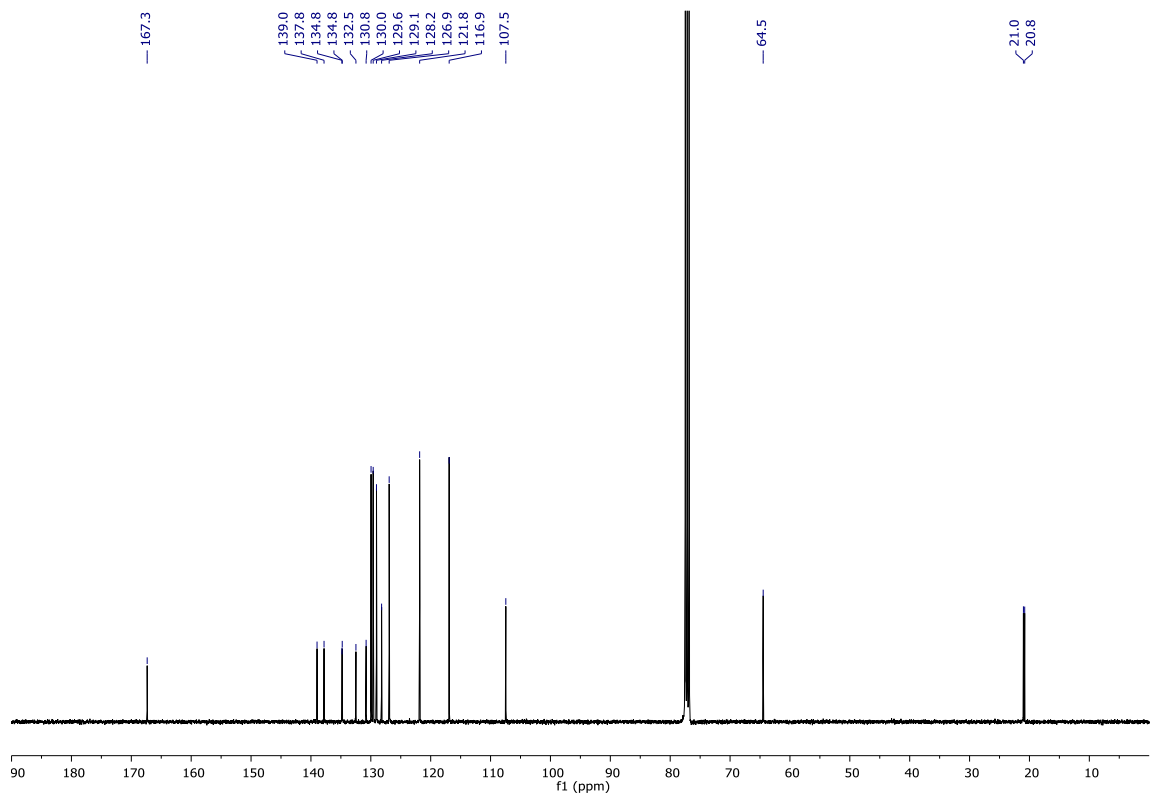

1,5-Diphenyl-3-(phenylamino)-1,5-dihydro-2H-pyrrol-2-one (1e)

<sup>1</sup>H NMR (400 MHz, CDCl<sub>3</sub>)

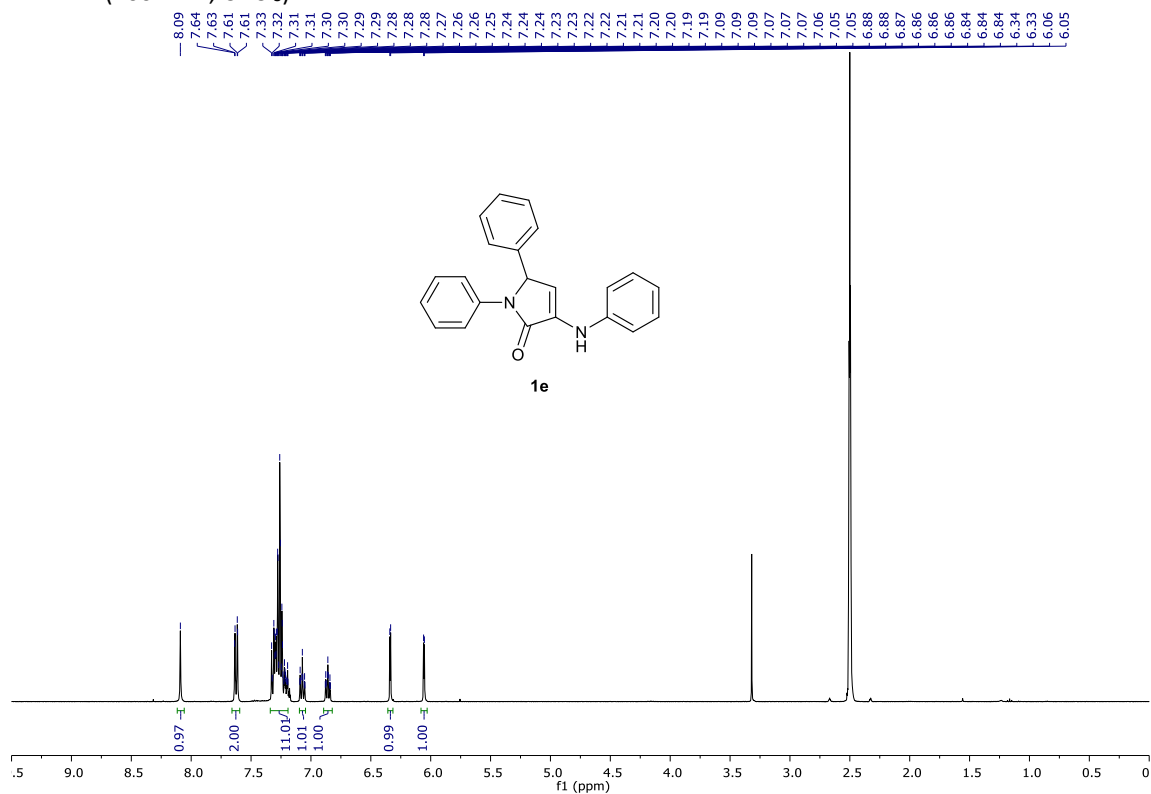

<sup>13</sup>C NMR {<sup>1</sup>H} (101 MHz, CDCl<sub>3</sub>)

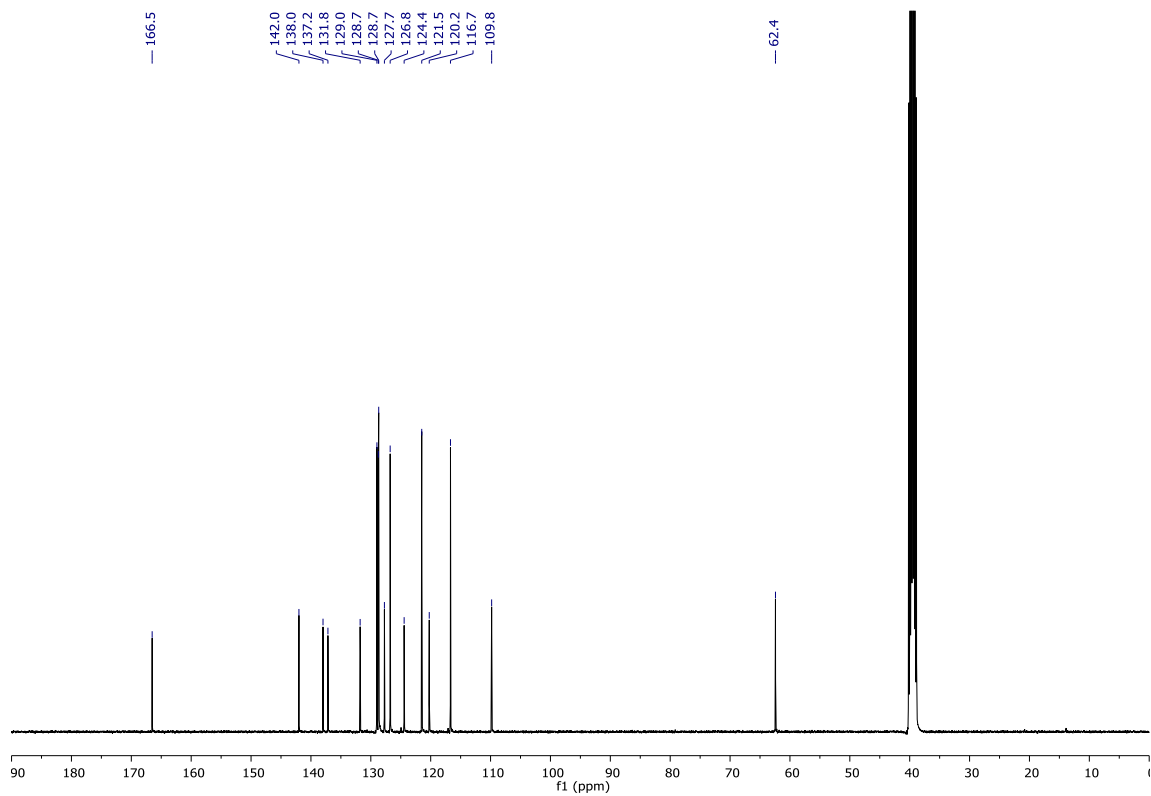

1-(4-Methoxyphenyl)-3-((4-methoxyphenyl)amino)-5-phenyl-1,5-dihydro-2H-pyrrol-2-one (1f)

$^1\text{H NMR}$  (300 MHz,  $\text{CDCl}_3$ )

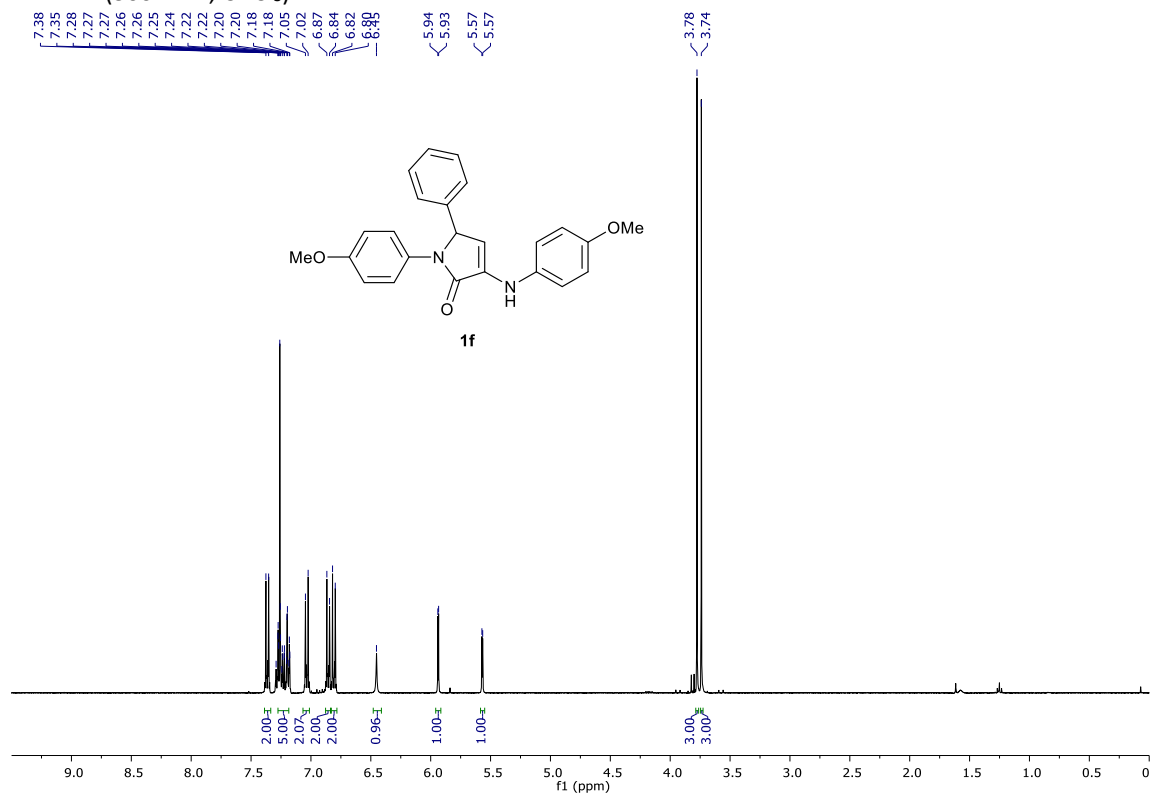

$^{13}\text{C NMR}$  [ $^1\text{H}$ ] (75 MHz,  $\text{CDCl}_3$ )

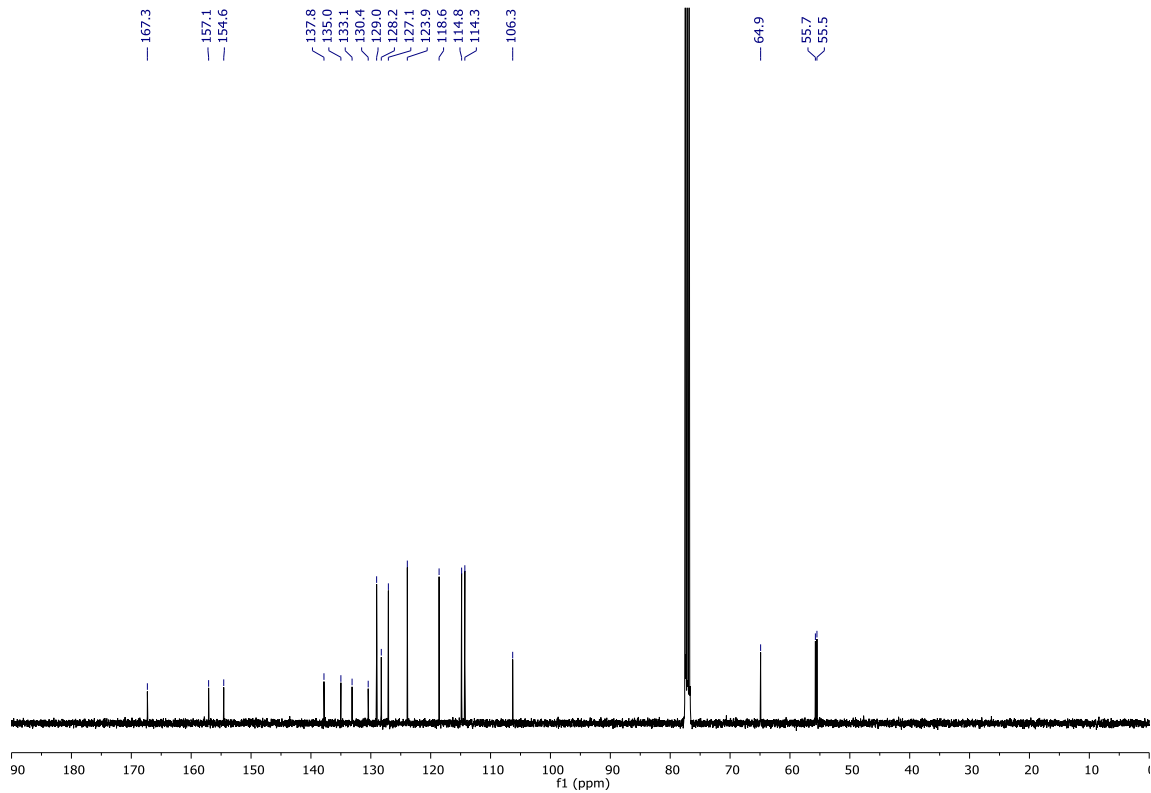

**1-(4-Bromophenyl)-3-((4-bromophenyl)amino)-4-((dimethylamino)methyl)-5-phenyl-1,5-dihydro-2H-pyrrol-2-one (2a)**

**<sup>1</sup>H NMR (400 MHz, CDCl<sub>3</sub>)**

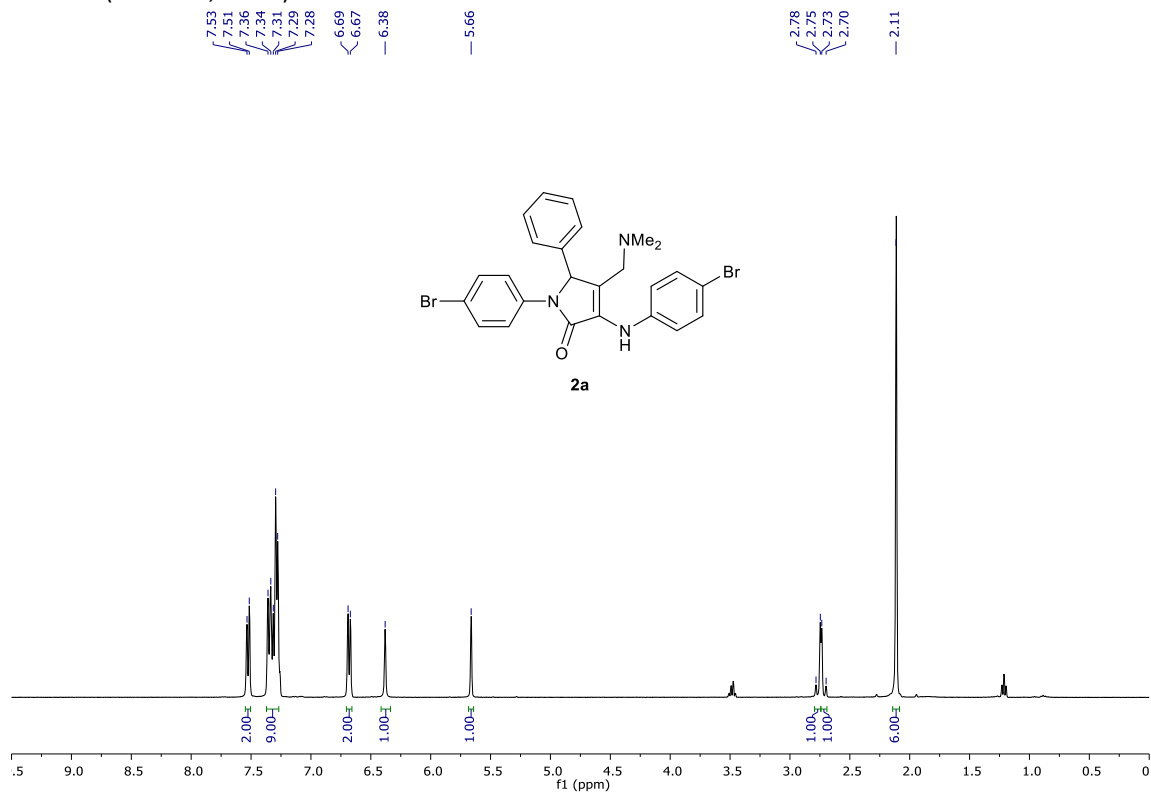

**<sup>13</sup>C NMR {<sup>1</sup>H} (101 MHz, CDCl<sub>3</sub>)**

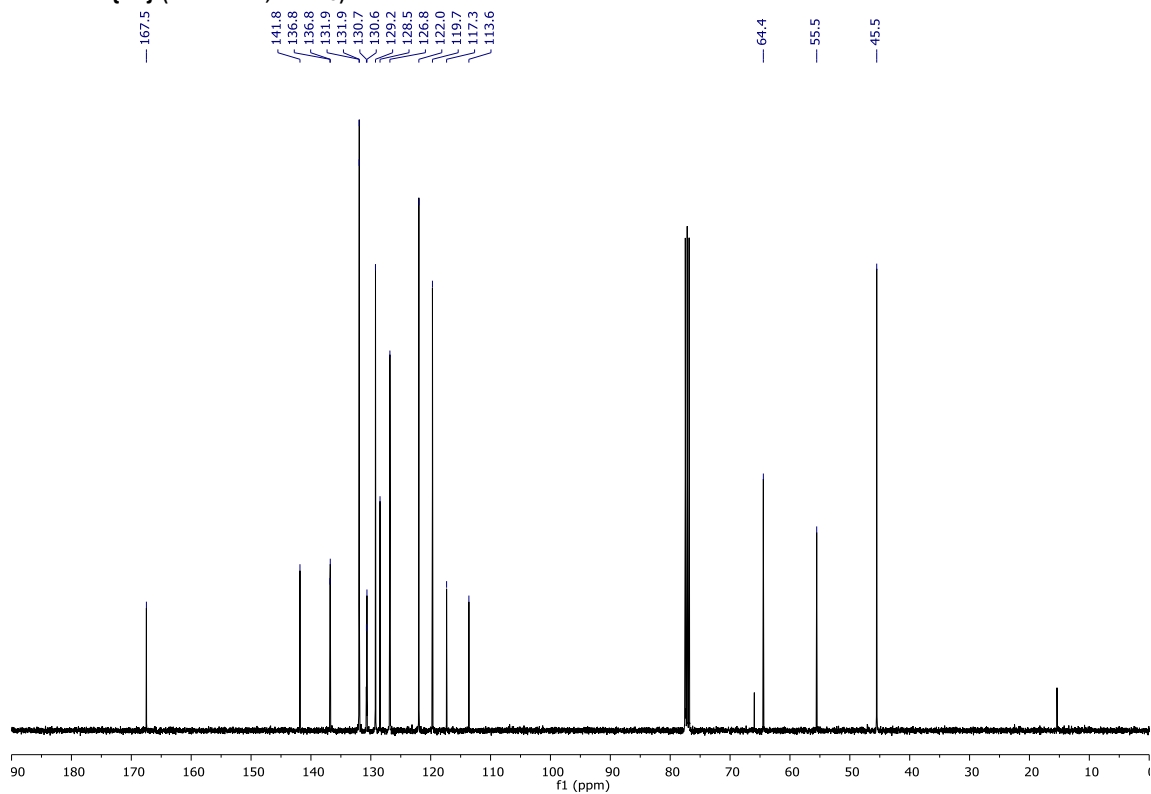



**1-(4-Chlorophenyl)-3-((4-chlorophenyl)amino)-4-((dimethylamino)methyl)-5-phenyl-1,5-dihydro-2H-pyrrol-2-one (2b)**

<sup>1</sup>H NMR (400 MHz, CDCl<sub>3</sub>)

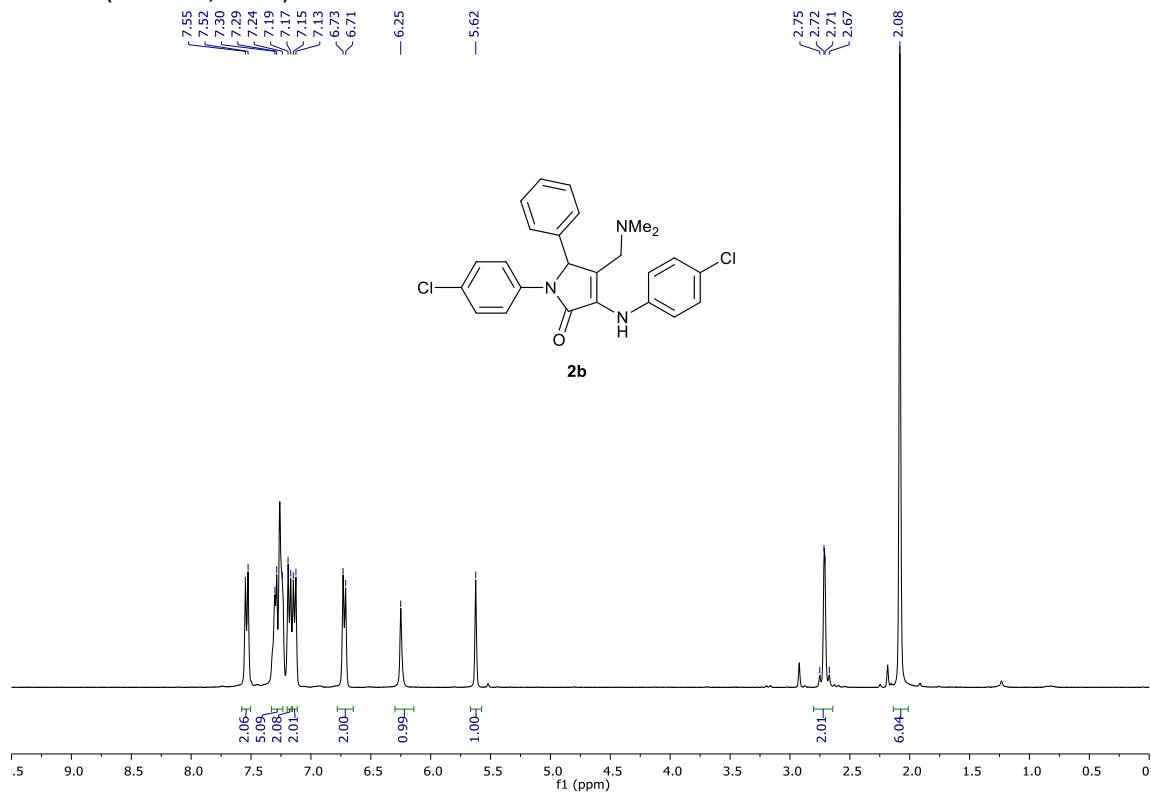

<sup>13</sup>C NMR{<sup>1</sup>H} (101 MHz, CDCl<sub>3</sub>)

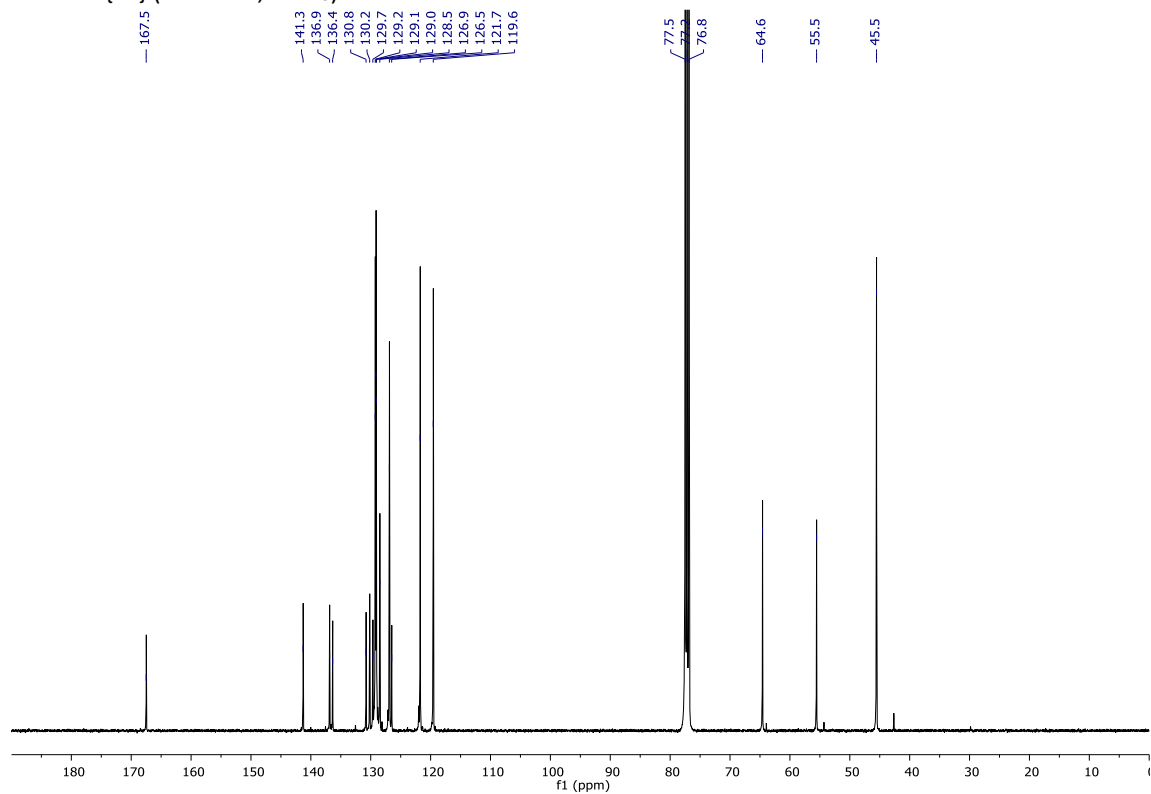

**4-((Dimethylamino)methyl)-1-(4-fluorophenyl)-3-((4-fluorophenyl)amino)-5-phenyl-1,5-dihydro-2H-pyrrol-2-one (2c)**

**<sup>1</sup>H NMR (400 MHz, CDCl<sub>3</sub>)**

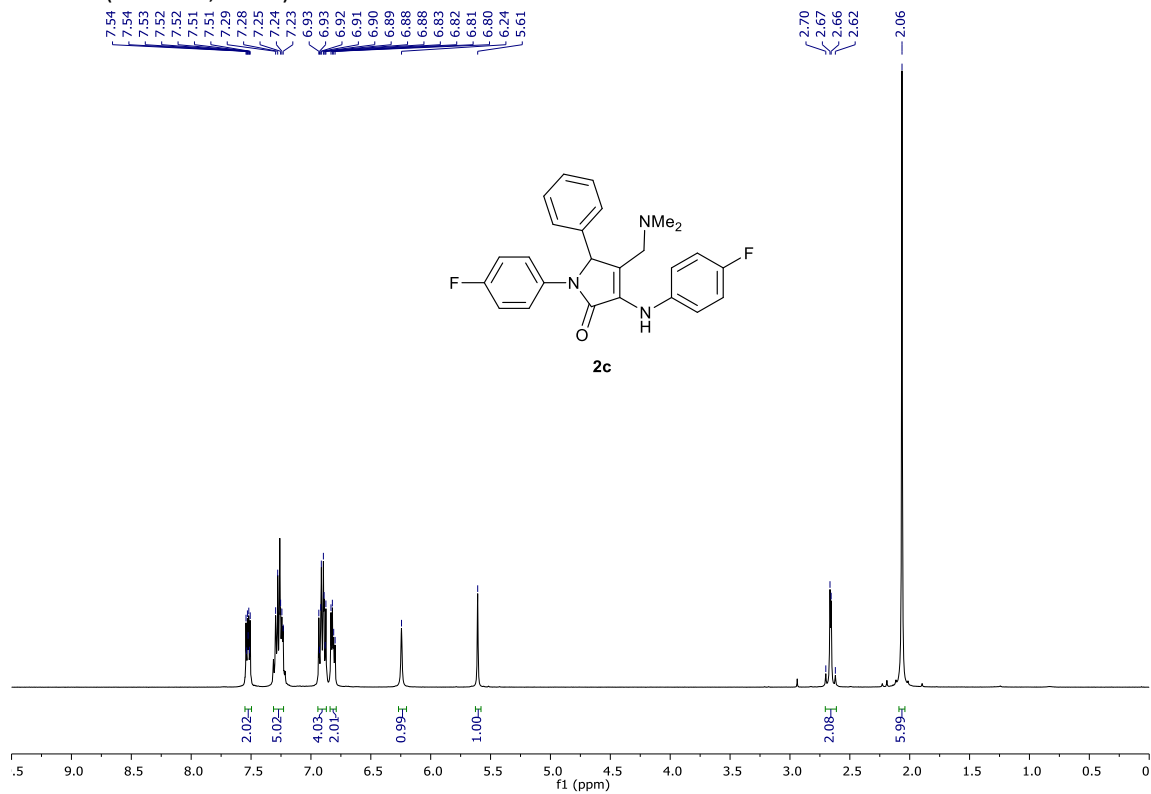

**<sup>13</sup>C NMR {<sup>1</sup>H} (101 MHz, CDCl<sub>3</sub>)**

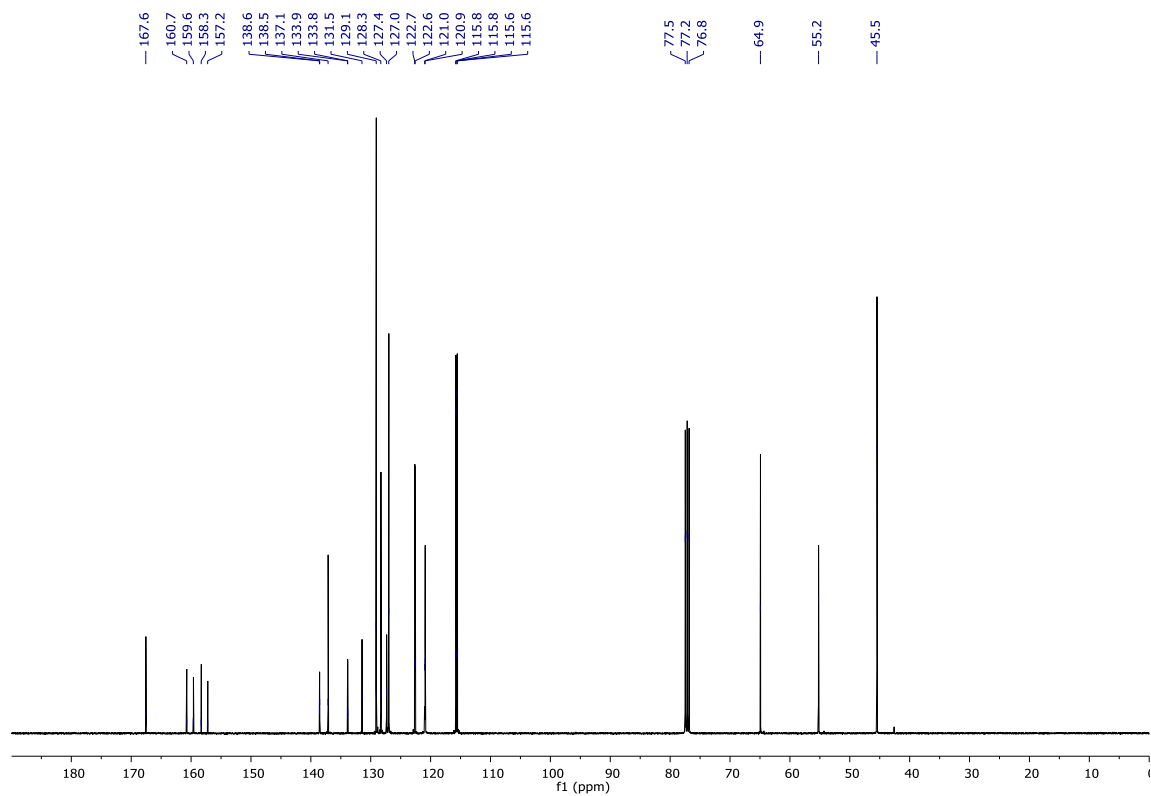

$^{19}\text{F}$  NMR  $\{^1\text{H}\}$  (282 MHz,  $\text{CDCl}_3$ )

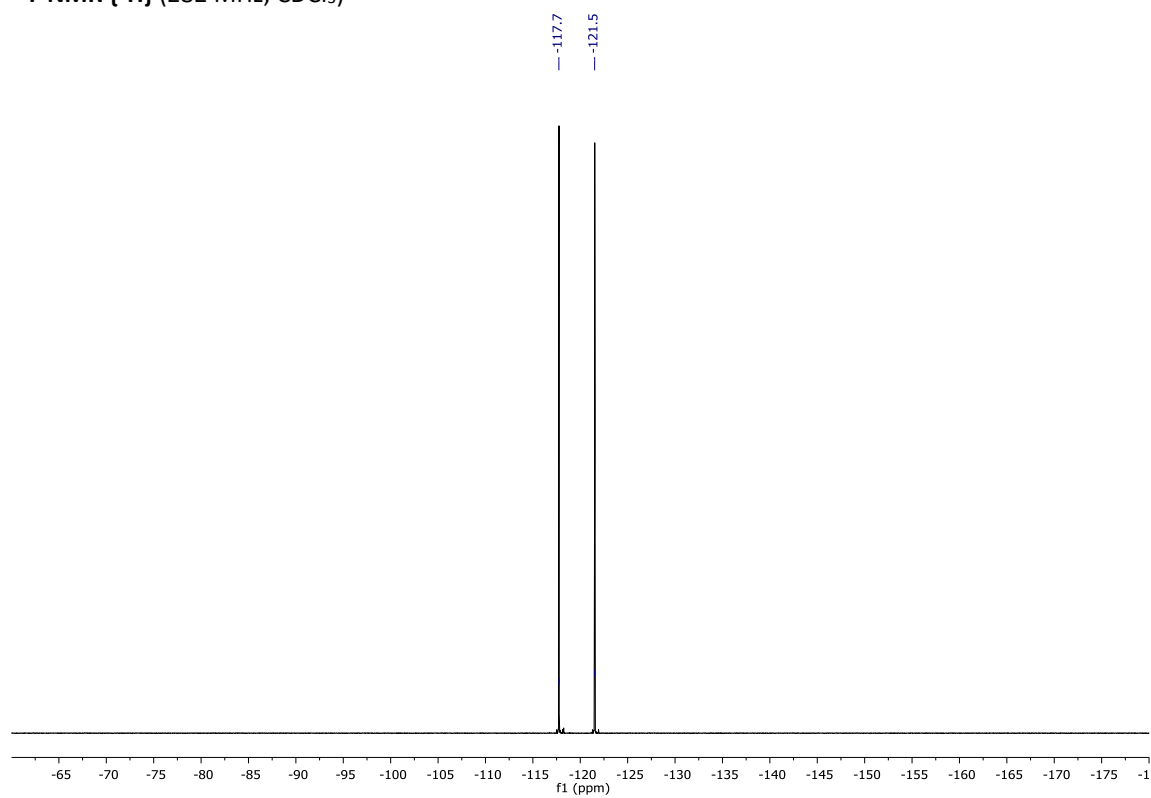

4-((Dimethylamino)methyl)-5-phenyl-1-(*p*-tolyl)-3-(*p*-tolylamino)-1,5-dihydro-2*H*-pyrrol-2-one (2d)

<sup>1</sup>H NMR (400 MHz, CDCl<sub>3</sub>)

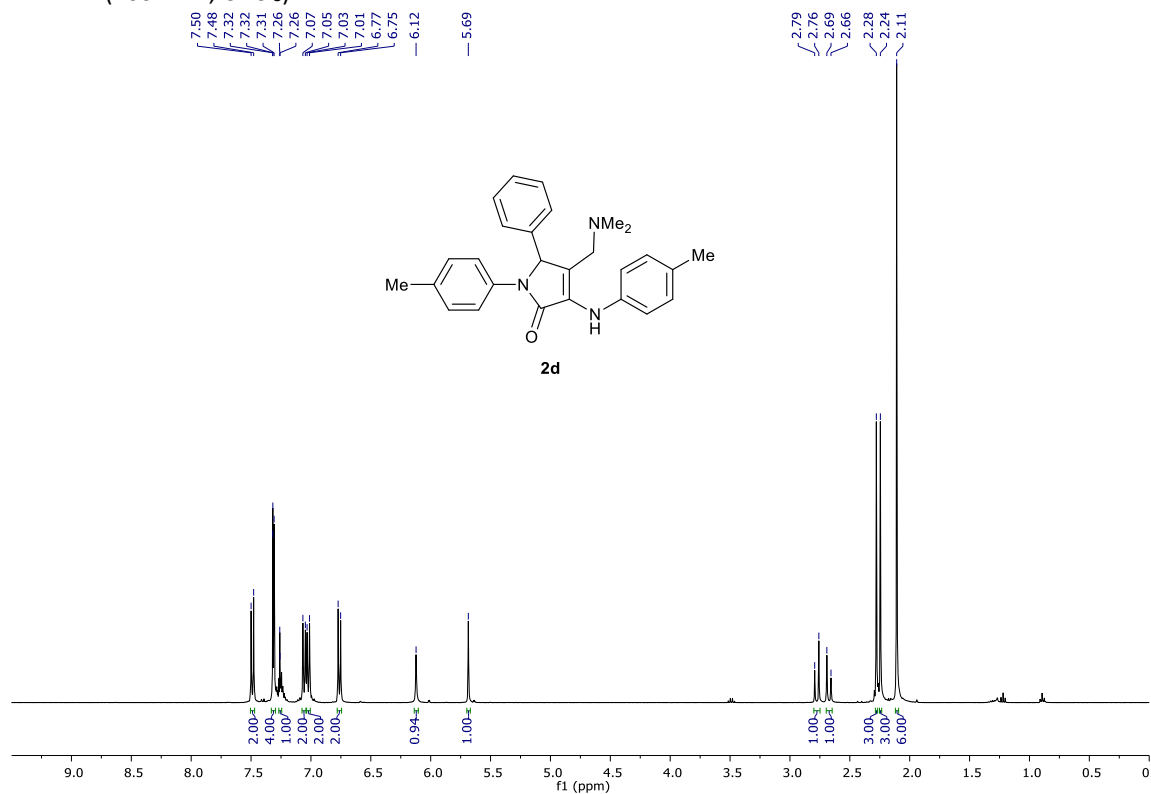

<sup>13</sup>C NMR {<sup>1</sup>H} (101 MHz, CDCl<sub>3</sub>)

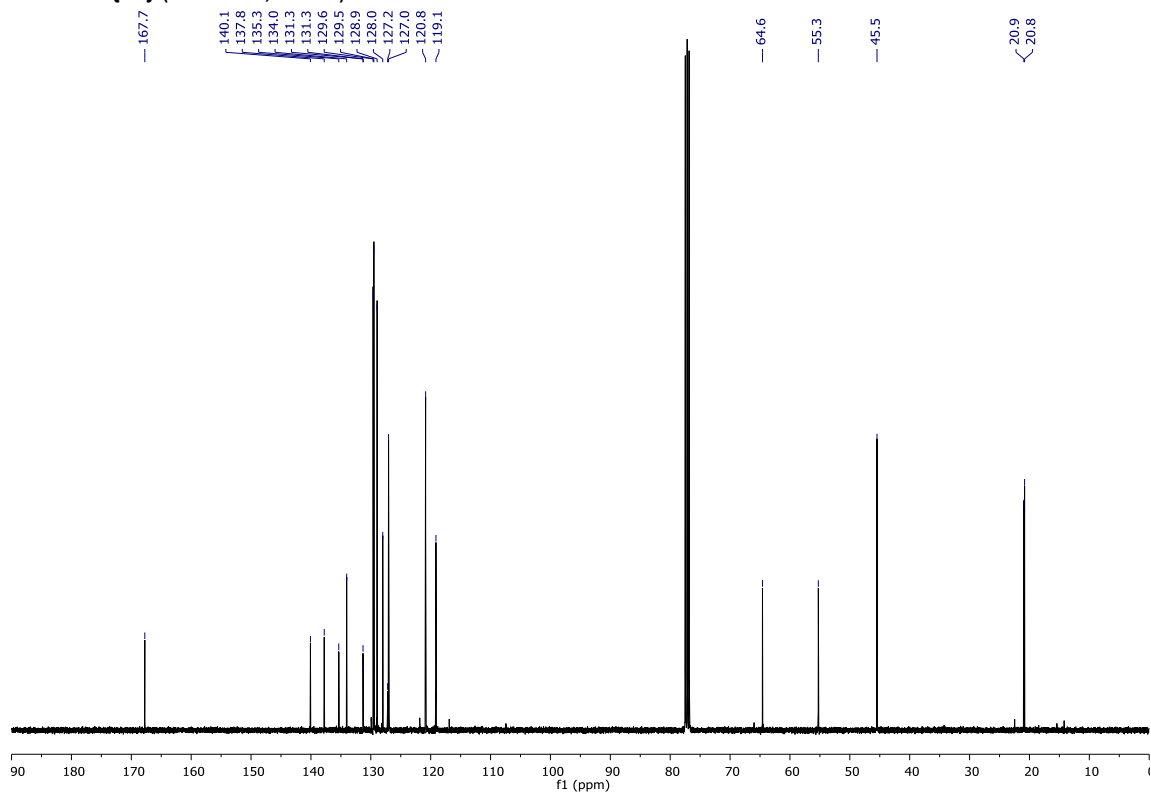

4-((dimethylamino)methyl)-1,5-diphenyl-3-(phenylamino)-1,5-dihydro-2H-pyrrol-2-one (2e)

<sup>1</sup>H NMR (400 MHz, CDCl<sub>3</sub>)

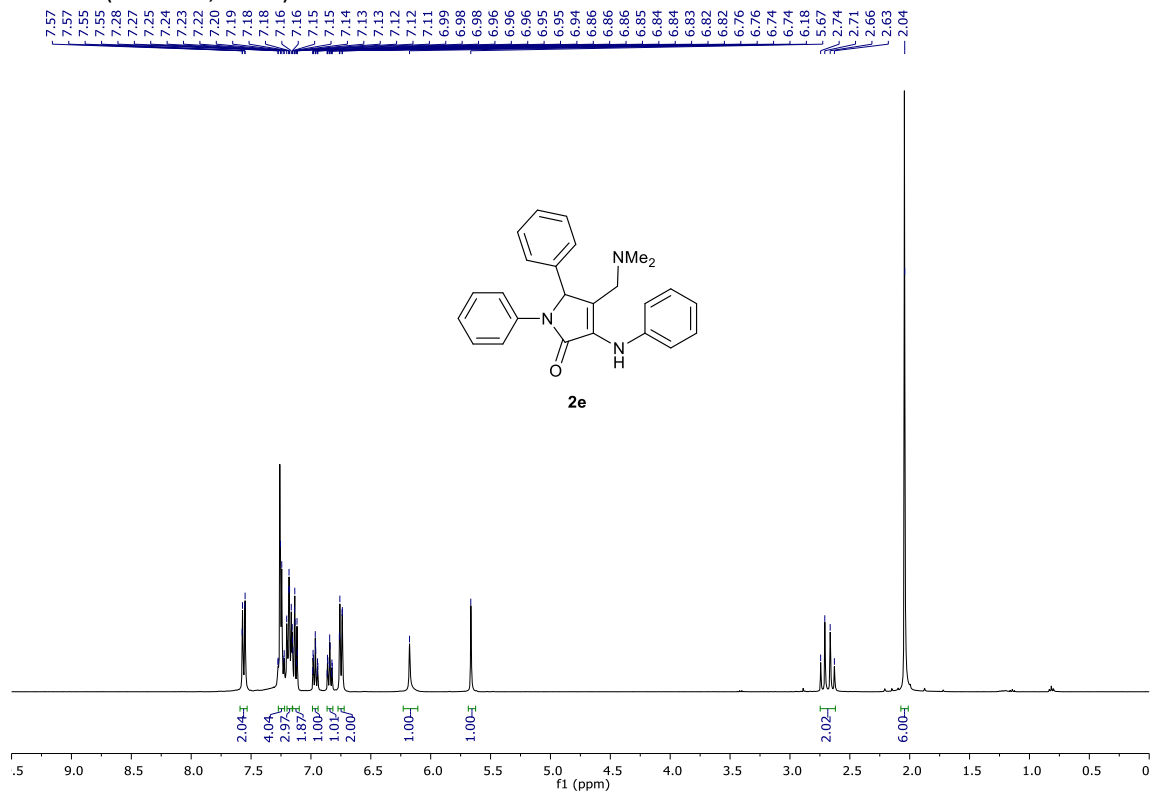

<sup>13</sup>C NMR {<sup>1</sup>H} (101 MHz, CDCl<sub>3</sub>)

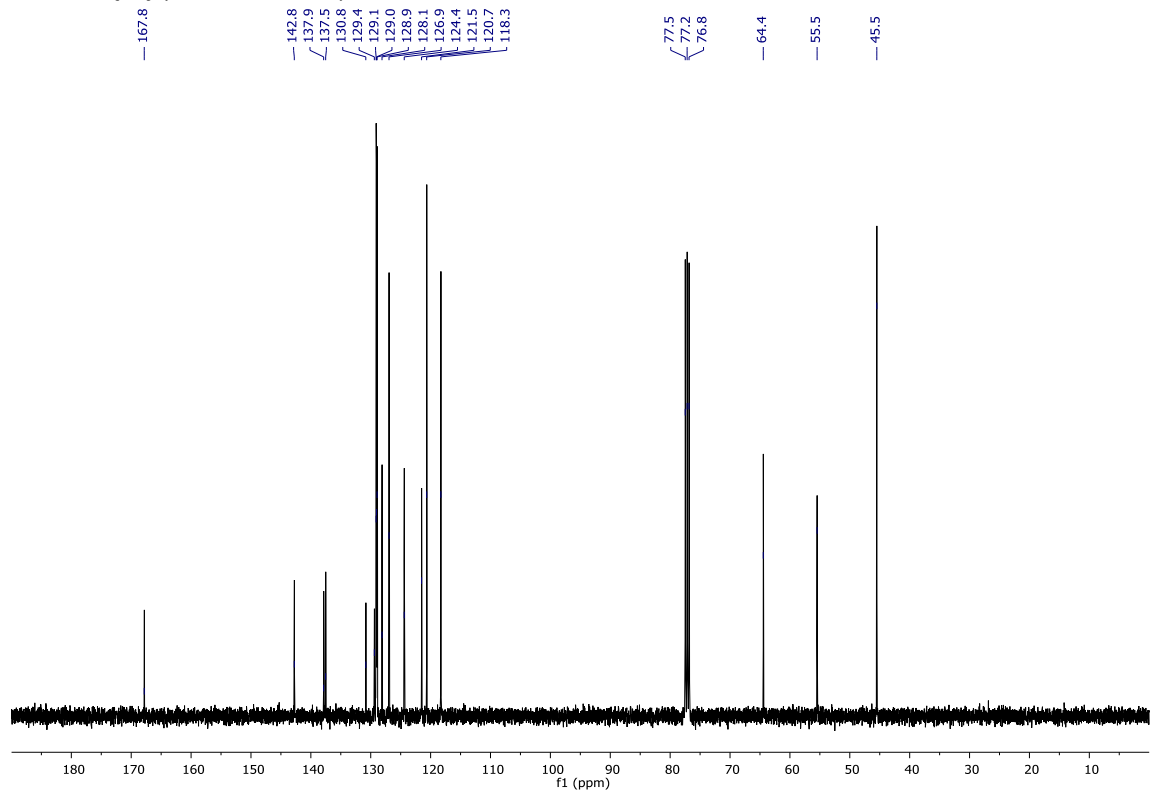

**4-((Dimethylamino)methyl)-1-(4-methoxyphenyl)-3-((4-methoxyphenyl)amino)-5-phenyl-1,5-dihydro-2H-pyrrol-2-one (2f)**

<sup>1</sup>H NMR (400 MHz, CDCl<sub>3</sub>)

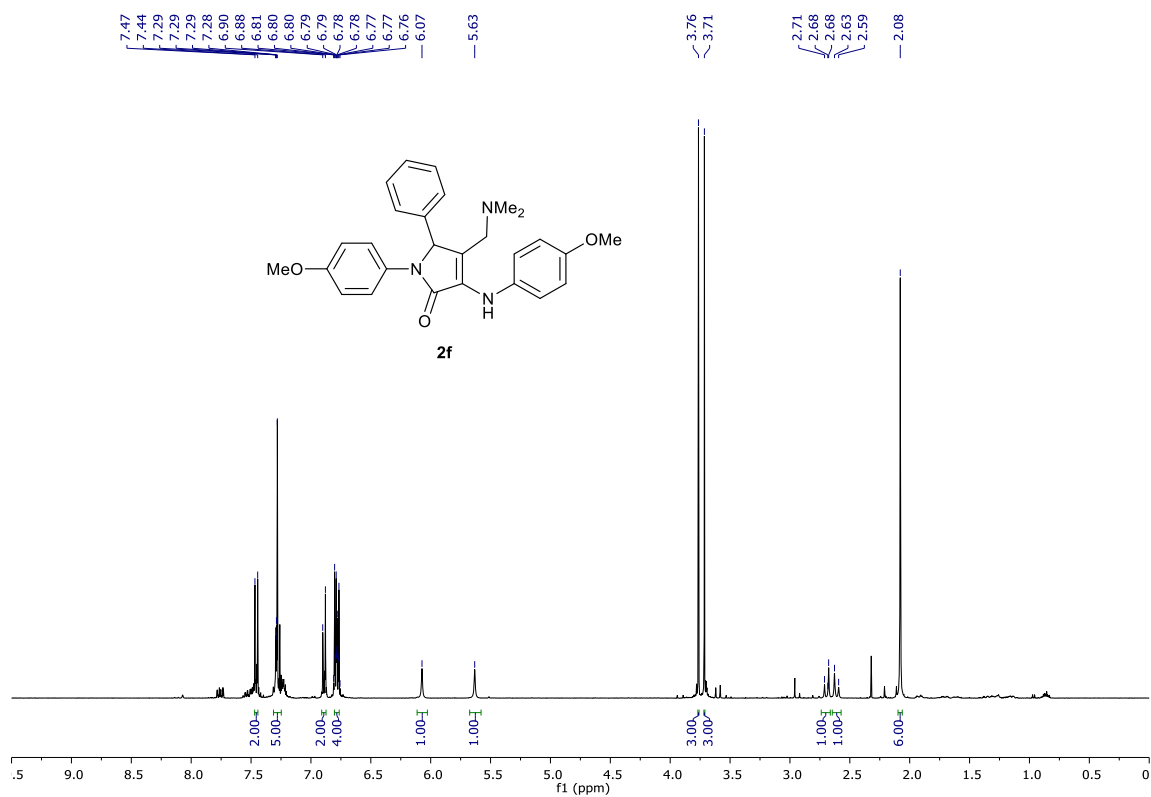

<sup>13</sup>C NMR {<sup>1</sup>H} (101 MHz, CDCl<sub>3</sub>)

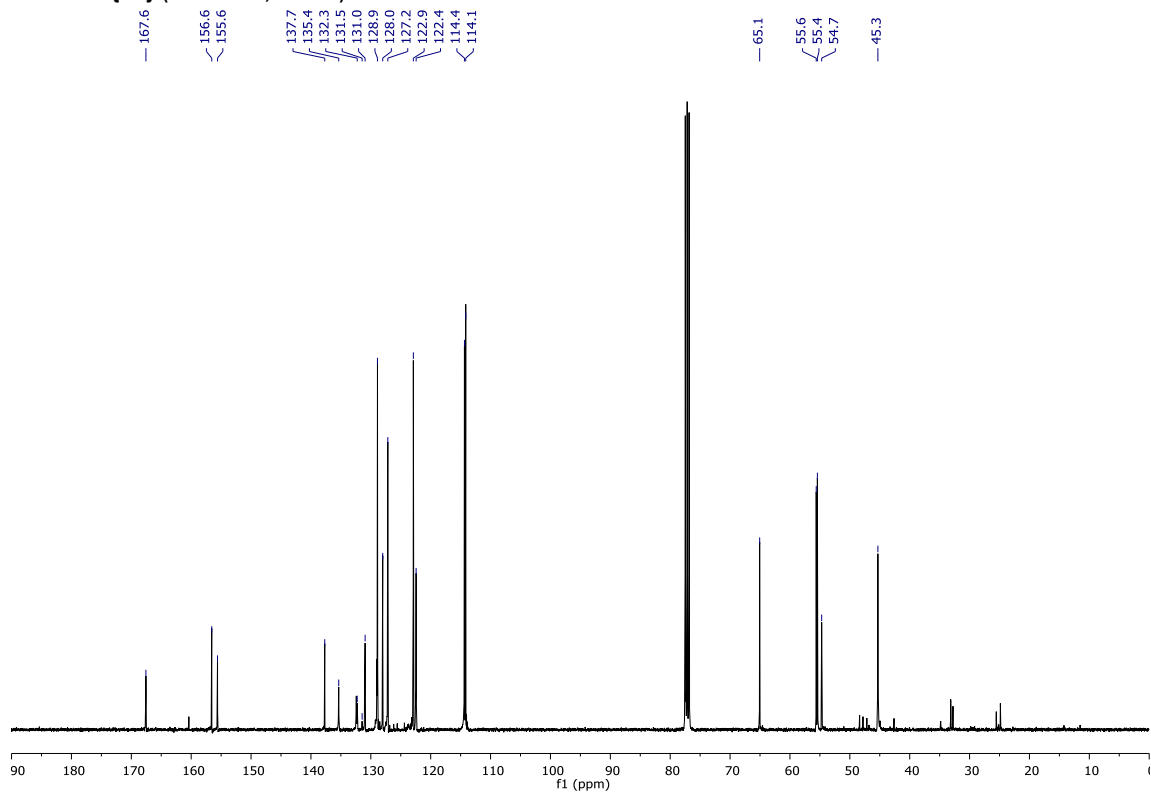

(5-Oxo-2-phenyl-1-(*p*-tolyl)-4-(*p*-tolylamino)-2,5-dihydro-1*H*-pyrrol-3-yl)methyl acetate (**3d**)

$^1\text{H NMR}$  (400 MHz,  $\text{CDCl}_3$ )

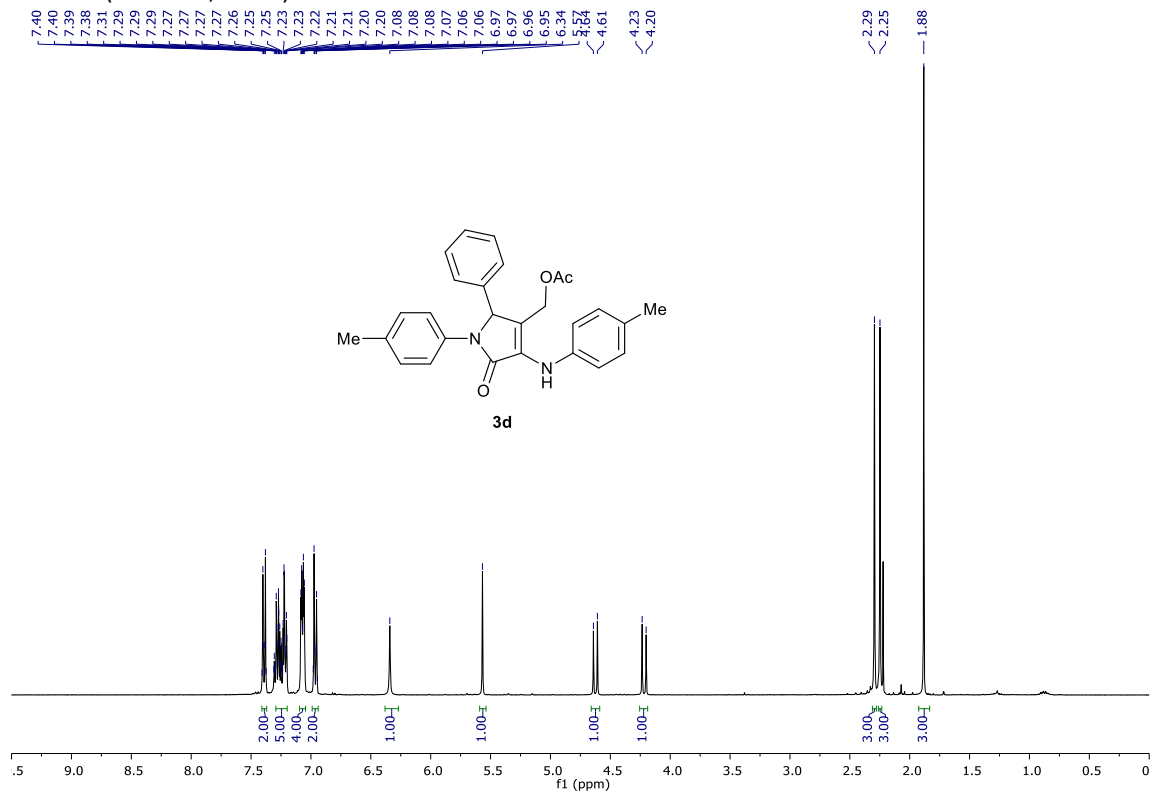

$^{13}\text{C NMR}$  [ $^1\text{H}$ ] (101 MHz,  $\text{CDCl}_3$ )

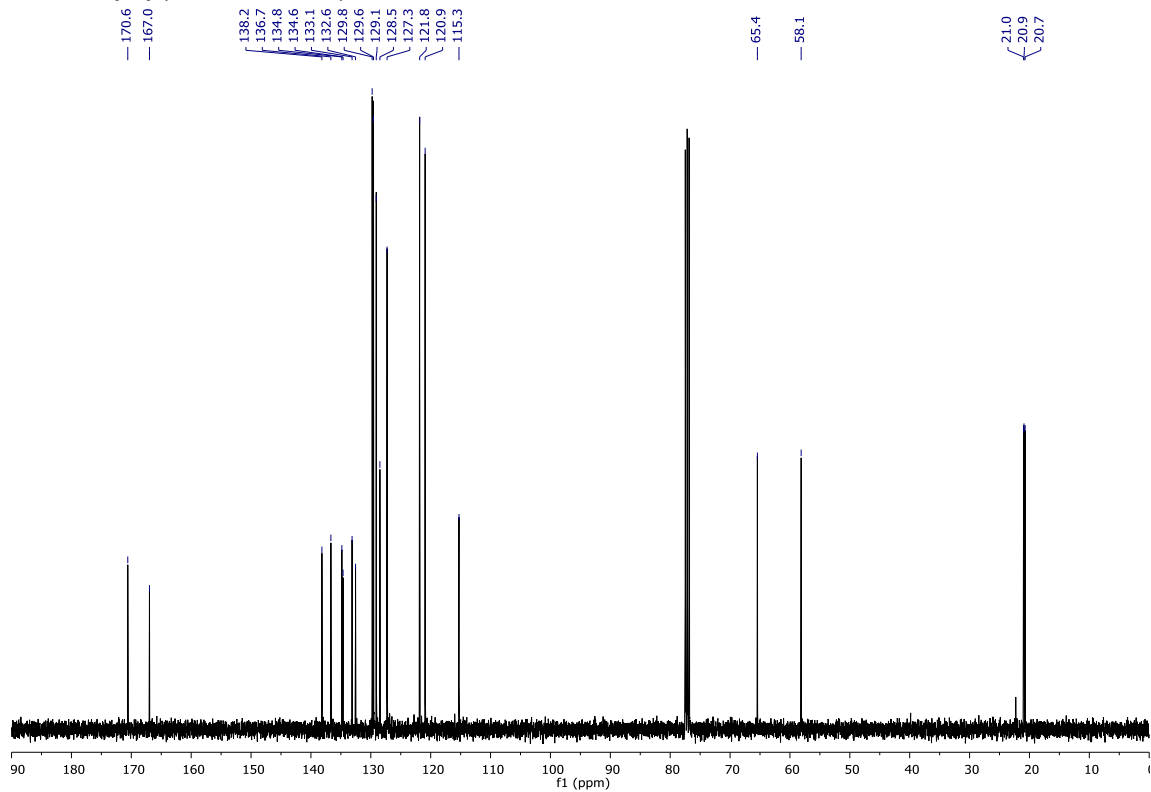

**(2*R*\*,3*R*\*,5'*S*\*,*Z*)-1,1',6'-Tris(4-bromophenyl)-4-((4-bromophenyl)imino)-2,5'-diphenyl-3',4',5',6'-tetrahydrospiro[pyrrolidine-3,2'-pyrrolo[3,4-*b*]pyridine]-5,7'(1'*H*)-dione (5a)**

<sup>1</sup>H NMR (400 MHz, CDCl<sub>3</sub>)

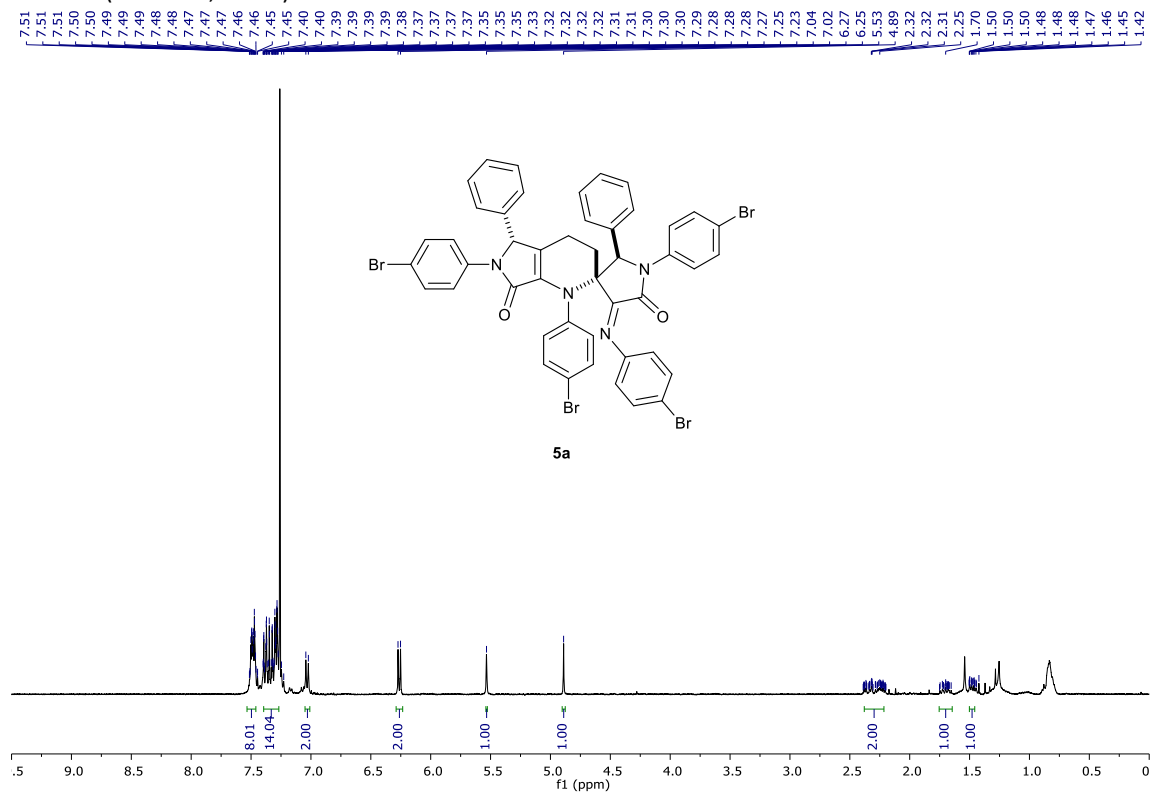

<sup>13</sup>C NMR {<sup>1</sup>H} (101 MHz, CDCl<sub>3</sub>)

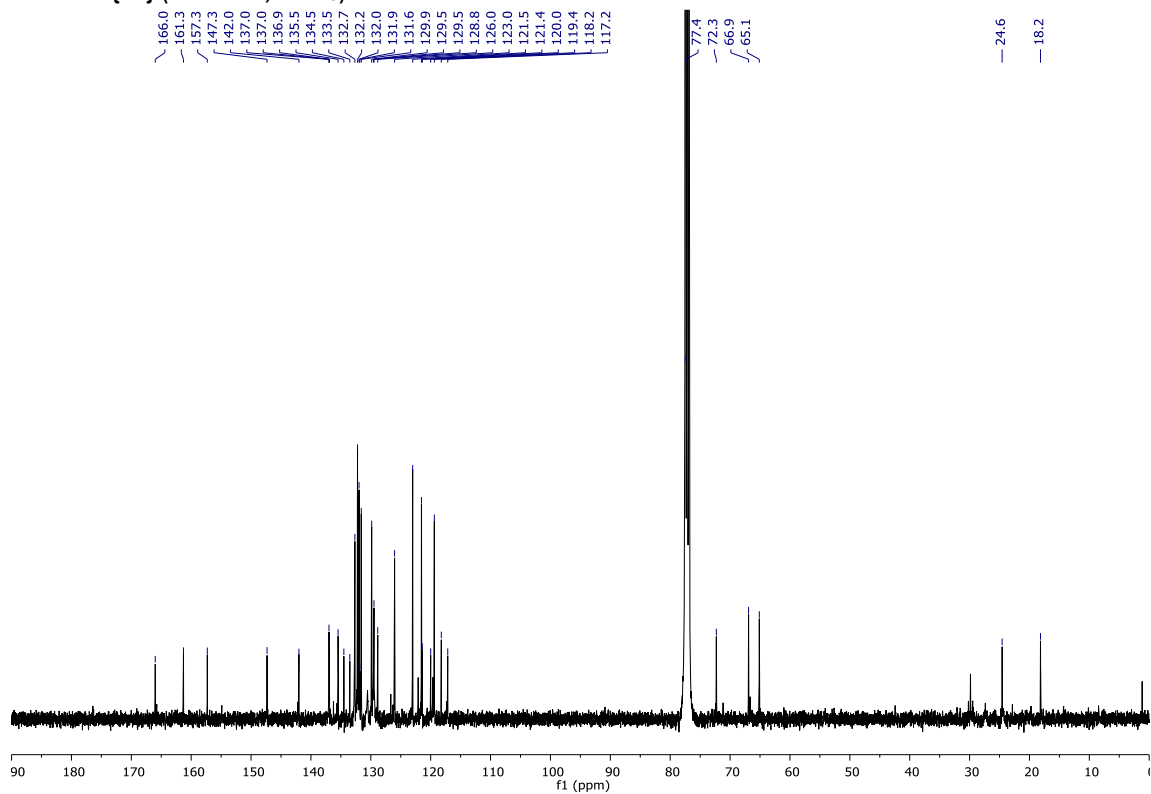



**(2*R*\*,3*R*\*,5'*R*\*,*Z*)-1,1',6'-Tris(4-chlorophenyl)-4-((4-chlorophenyl)imino)-2,5'-diphenyl-3',4',5',6'-tetrahydrospiro[pyrrolidine-3,2'-pyrrolo[3,4-*b*]pyridine]-5,7'(1'*H*)-dione (5b)**

<sup>1</sup>H NMR (400 MHz, CDCl<sub>3</sub>)

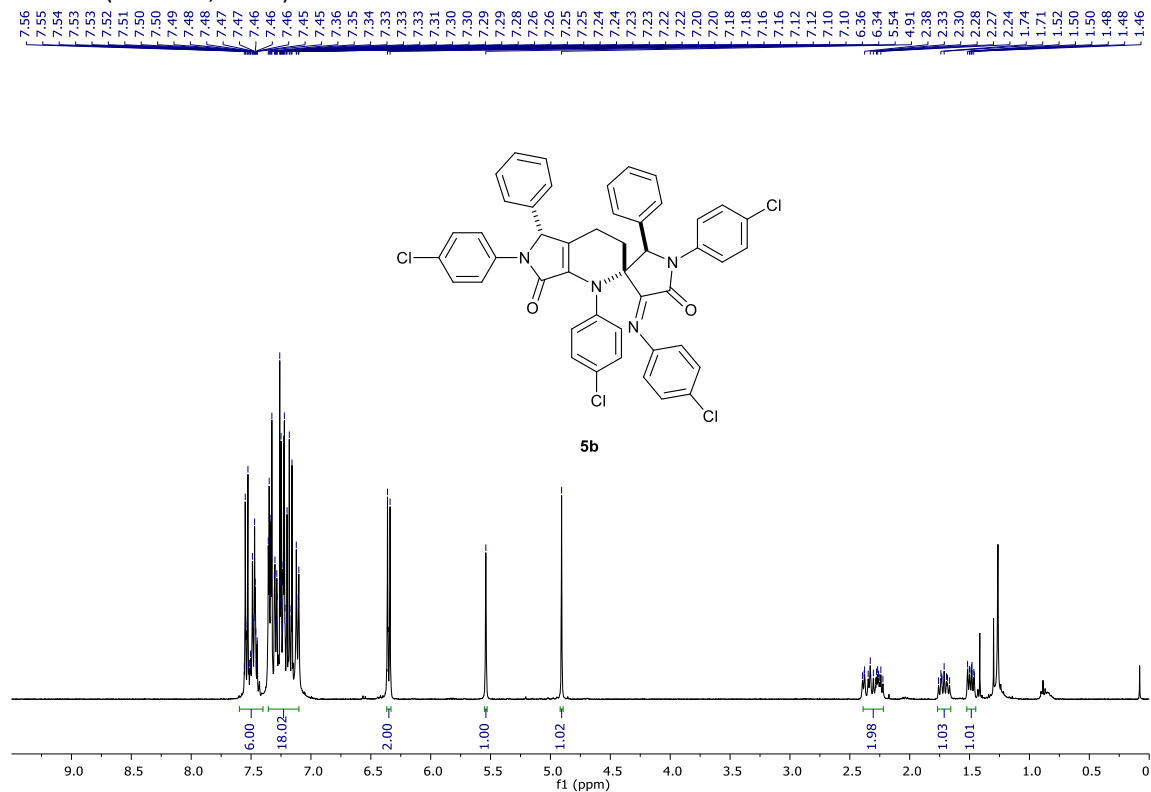

<sup>13</sup>C NMR {<sup>1</sup>H} (101 MHz, CDCl<sub>3</sub>)

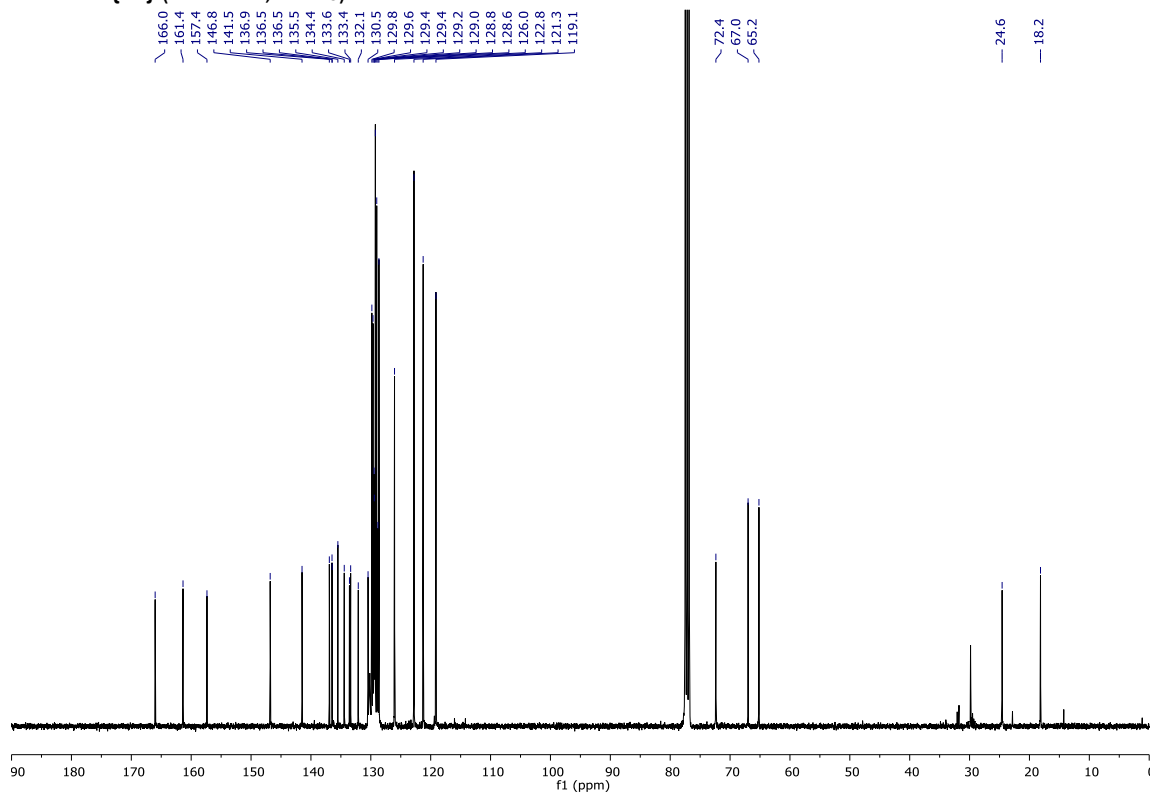

**(2*R*\*,3*R*\*,5'*R*\*,*Z*)-1,1',6'-Tris(4-fluorophenyl)-4-((4-fluorophenyl)imino)-2,5'-diphenyl-3',4',5',6'-tetrahydrospiro[pyrrolidine-3,2'-pyrrolo[3,4-*b*]pyridine]-5,7'(1'*H*)-dione (5c)**

<sup>1</sup>H NMR (400 MHz, CDCl<sub>3</sub>)

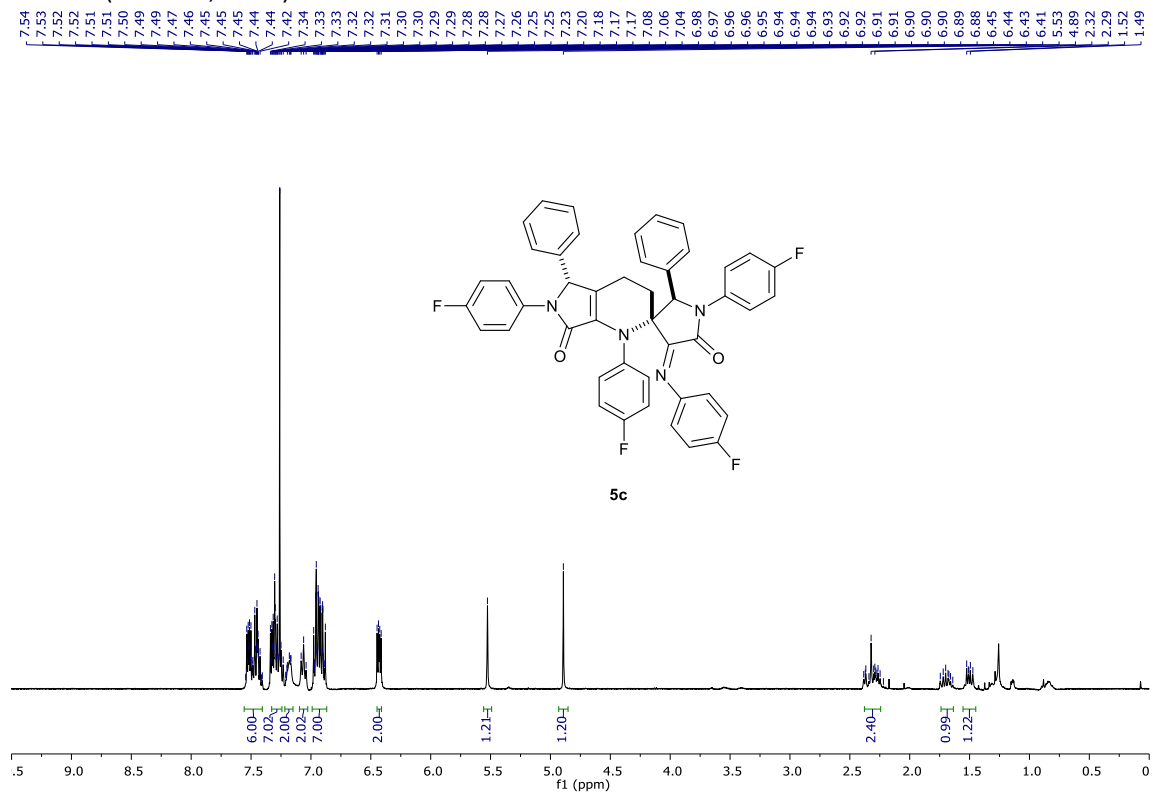

<sup>13</sup>C NMR{<sup>1</sup>H} (101 MHz, CDCl<sub>3</sub>)

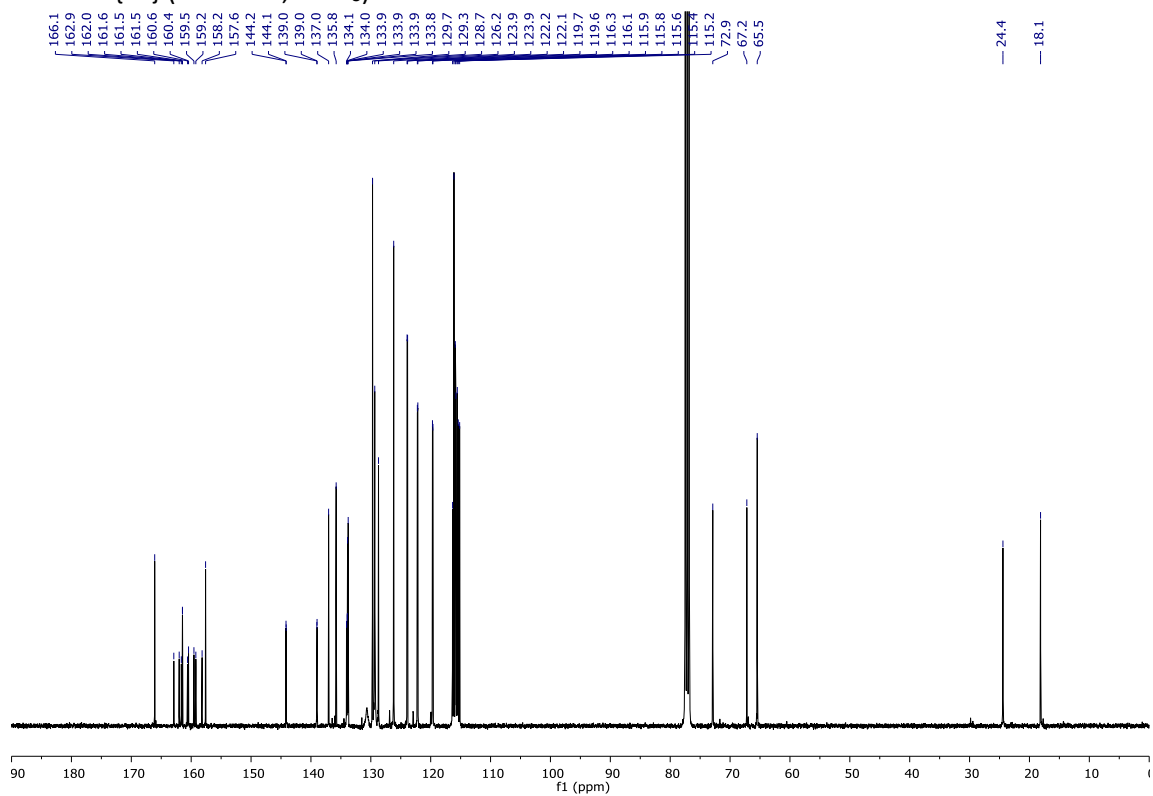

$^{19}\text{F}$  NMR  $\{^1\text{H}\}$  (282 MHz,  $\text{CDCl}_3$ )

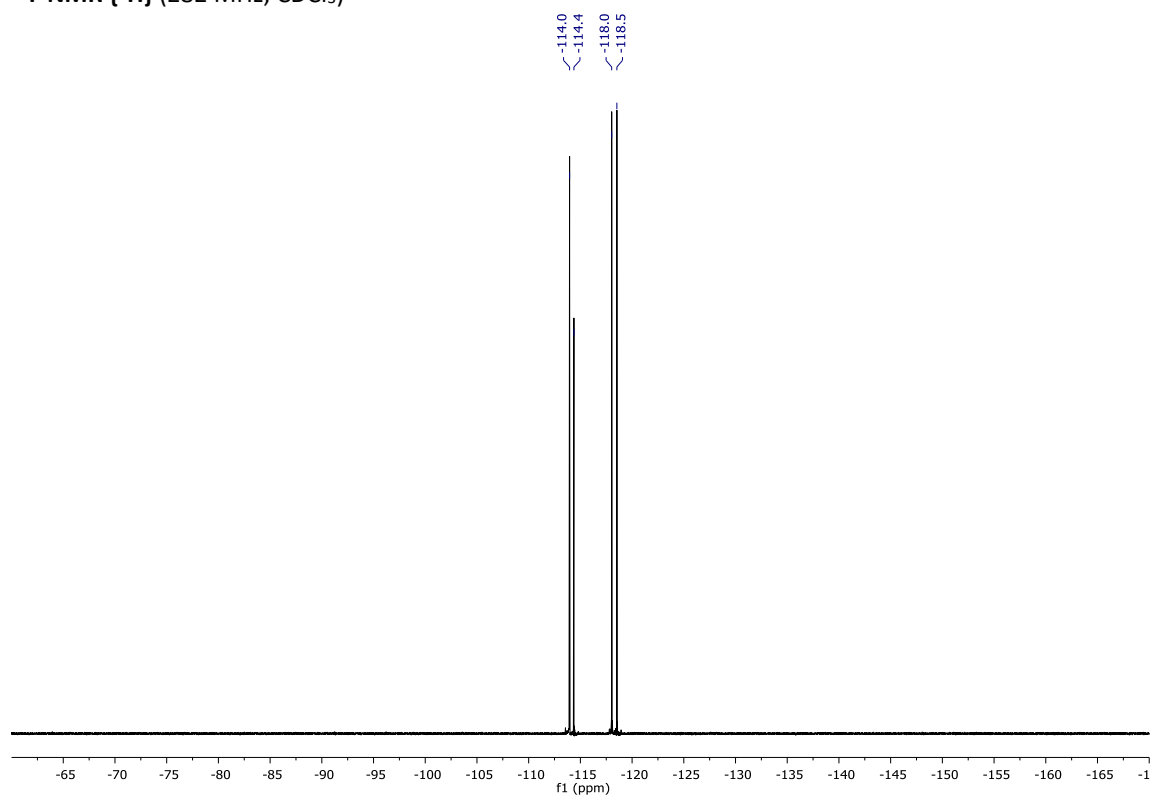

**(2*R*\*,3*R*\*,5'*R*\*,*Z*)-2,5'-Diphenyl-1,1',6'-tri-*p*-tolyl-4-(*p*-tolylimino)-3',4',5',6'-tetrahydrospiro[pyrrolidine-3,2'-pyrro[3,4-*b*]pyridine]-5,7'(1'*H*)-dione (5d)**

<sup>1</sup>H NMR (400 MHz, CDCl<sub>3</sub>)

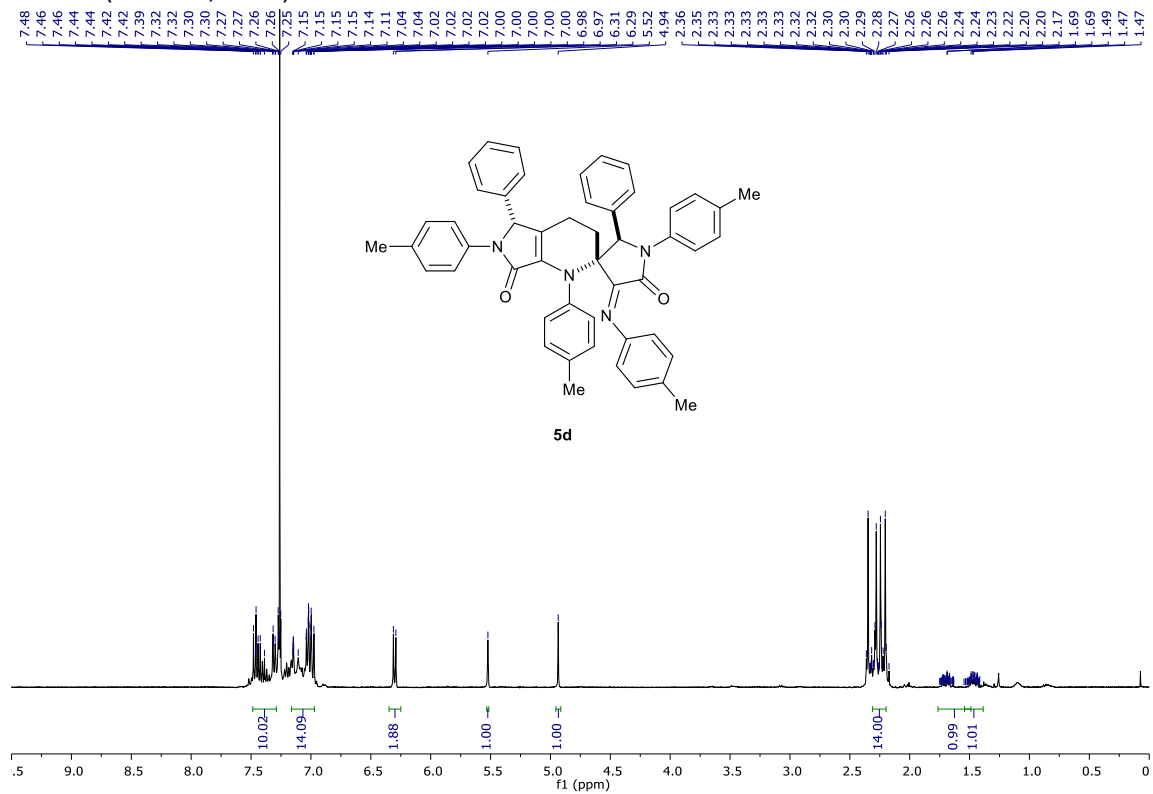

<sup>13</sup>C NMR {<sup>1</sup>H} (101 MHz, CDCl<sub>3</sub>)

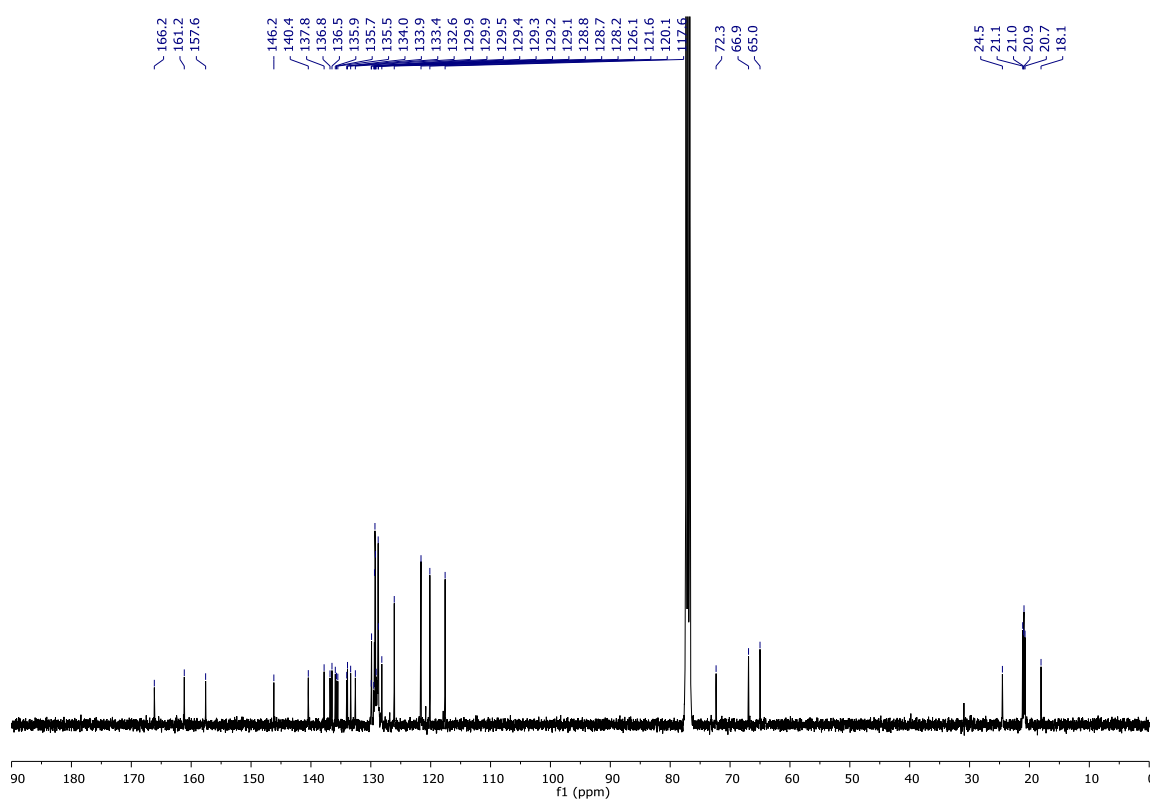

**(2*R*\*,5'*R*\*,*Z*)-1,1',6'-Tris(4-methoxyphenyl)-4-((4-methoxyphenyl)imino)-2,5'-diphenyl-3',4',5',6'-tetrahydrospiro[pyrrolidine-3,2'-pyrrolo[3,4-*b*]pyridine]-5,7'(1'*H*)-dione (5f)**

<sup>1</sup>H NMR (400 MHz, CDCl<sub>3</sub>)

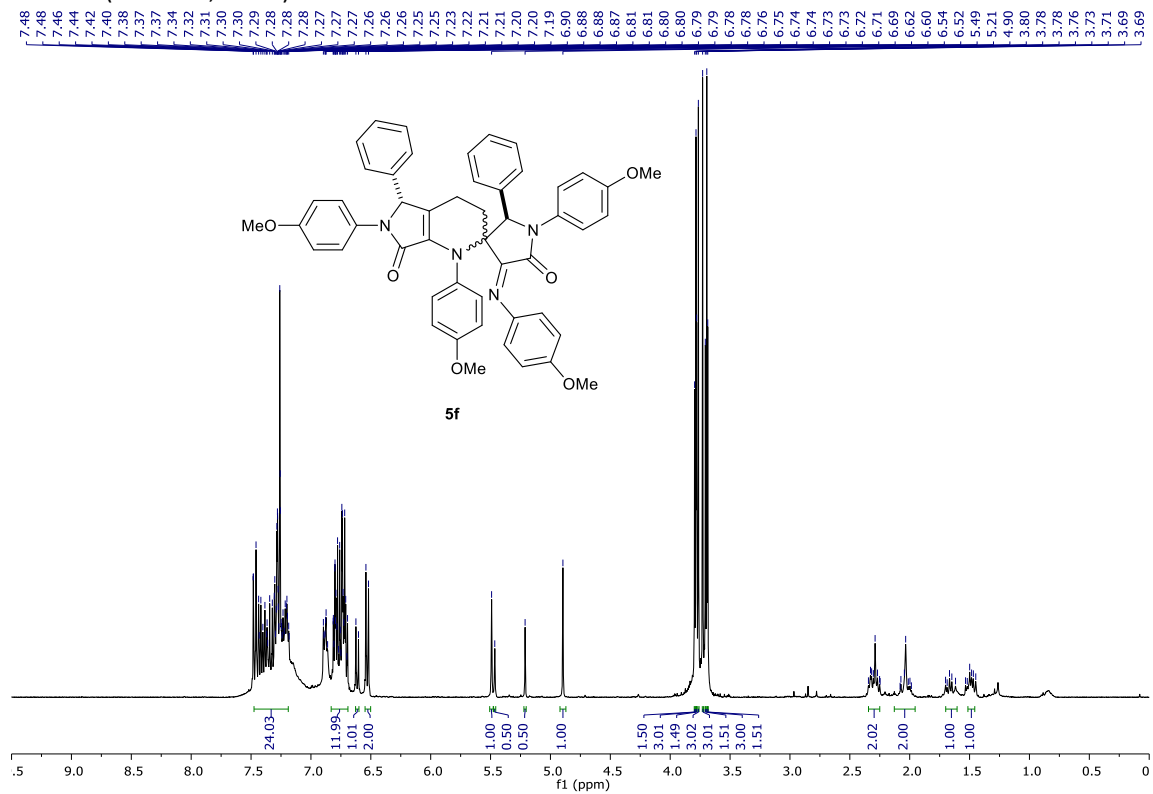

<sup>13</sup>C NMR {<sup>1</sup>H} (101 MHz, CDCl<sub>3</sub>)

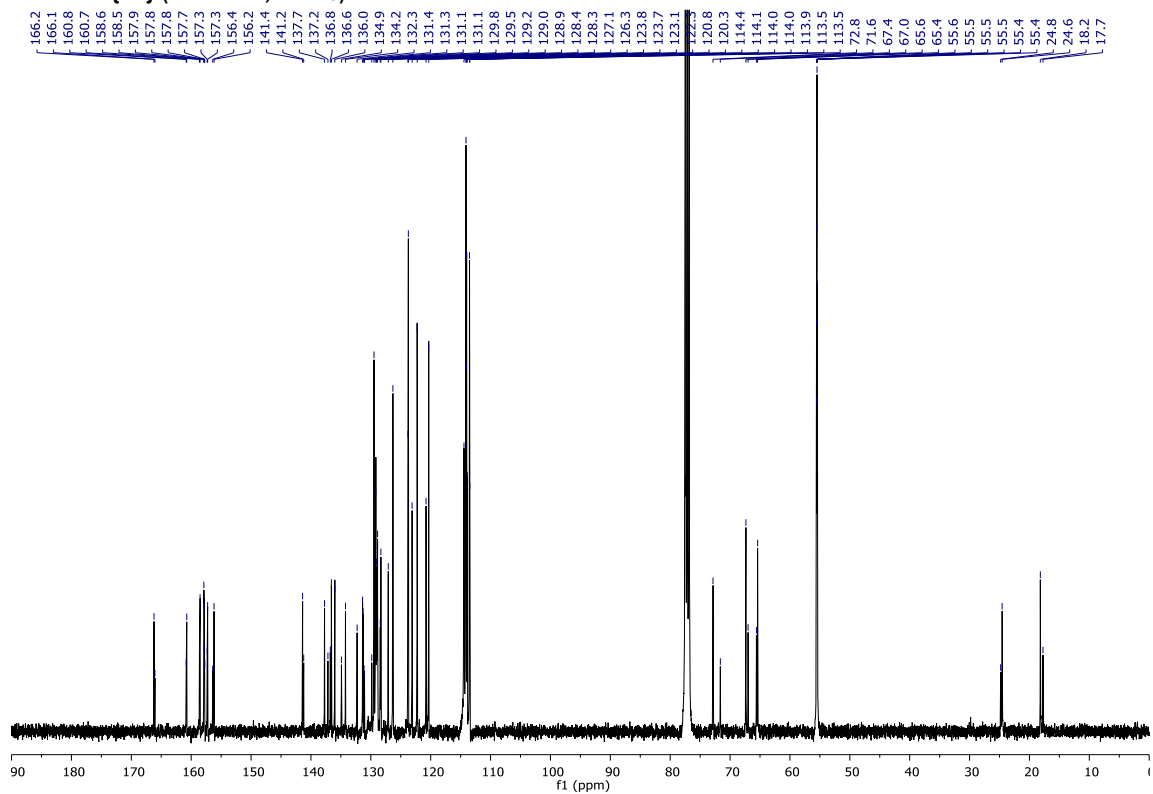

## VI. Copies of 2D NMR spectra for 2d and 5b

4-((Dimethylamino)methyl)-5-phenyl-1-(*p*-tolyl)-3-(*p*-tolylamino)-1,5-dihydro-2*H*-pyrrol-2-one (**2d**).

2D-COSY NMR [ $^1\text{H} - ^1\text{H}$ ] (400 MHz,  $\text{CDCl}_3$ )

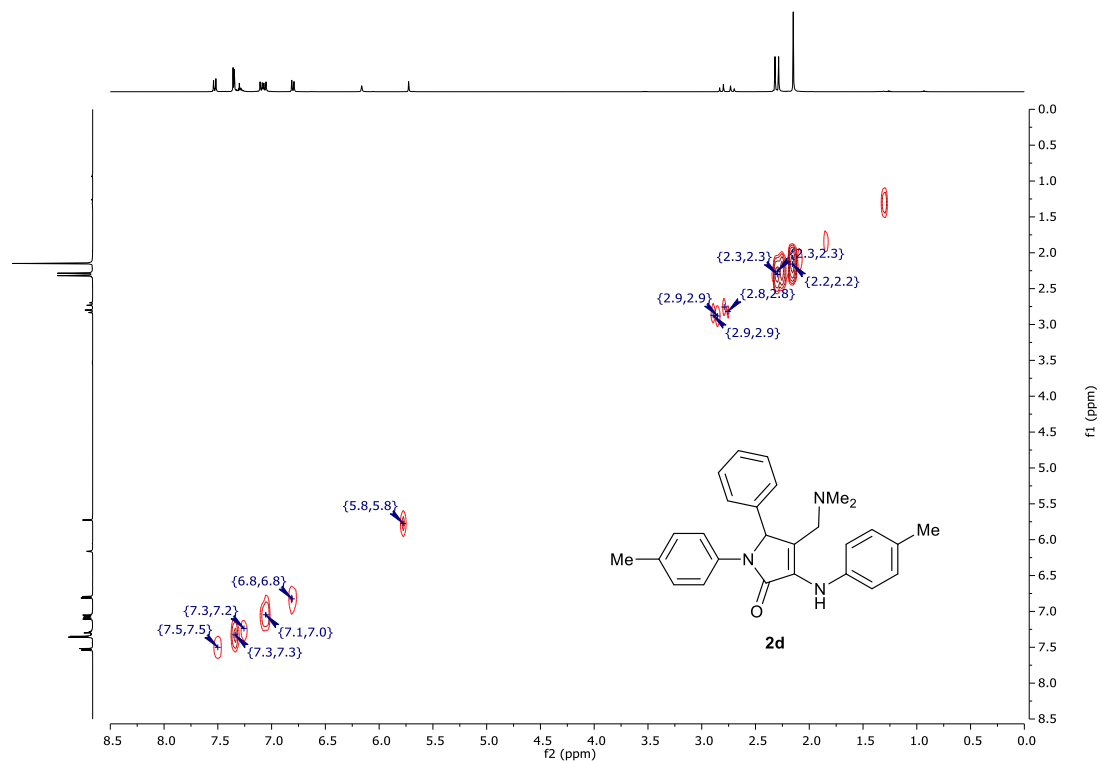

2D-HSQC NMR [ $^1\text{H} - ^{13}\text{C}$ ] ( $^1\text{H}$ : 400 MHz,  $^{13}\text{C}$ : 101 MHz,  $\text{CDCl}_3$ )

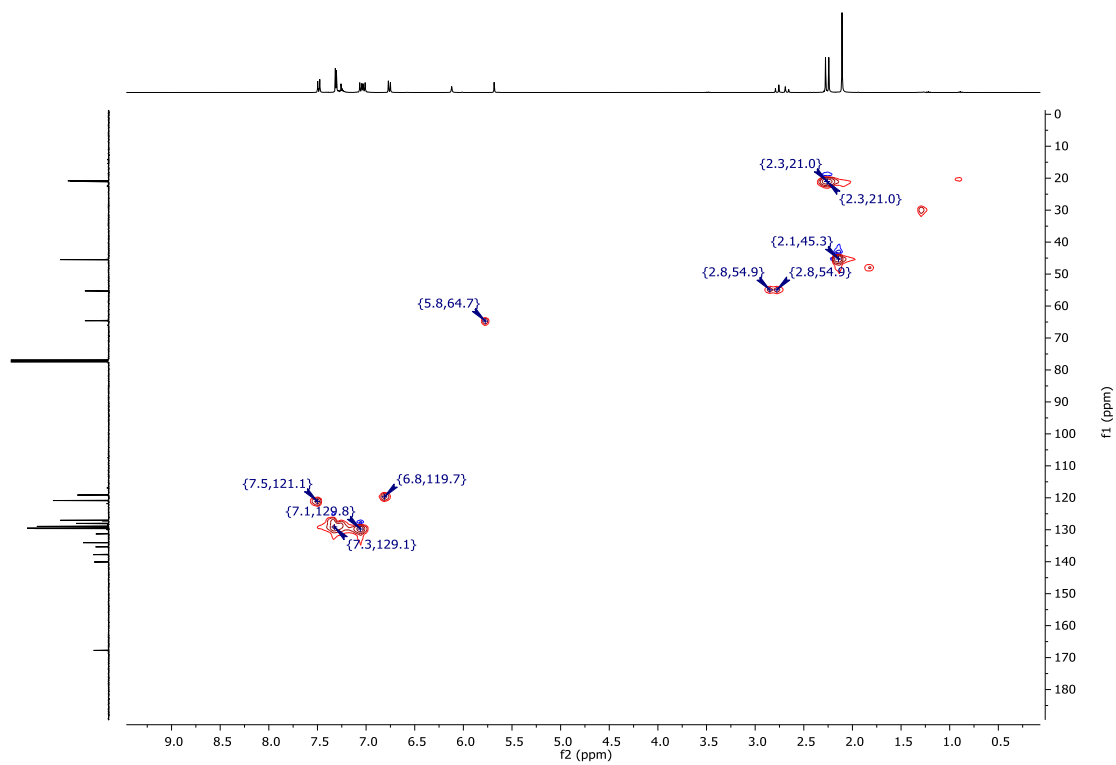

2D-HMBC NMR  $\{^1\text{H} - ^{13}\text{C}\}$  ( $^1\text{H}$ : 400 MHz,  $^{13}\text{C}$ : 101 MHz,  $\text{CDCl}_3$ )

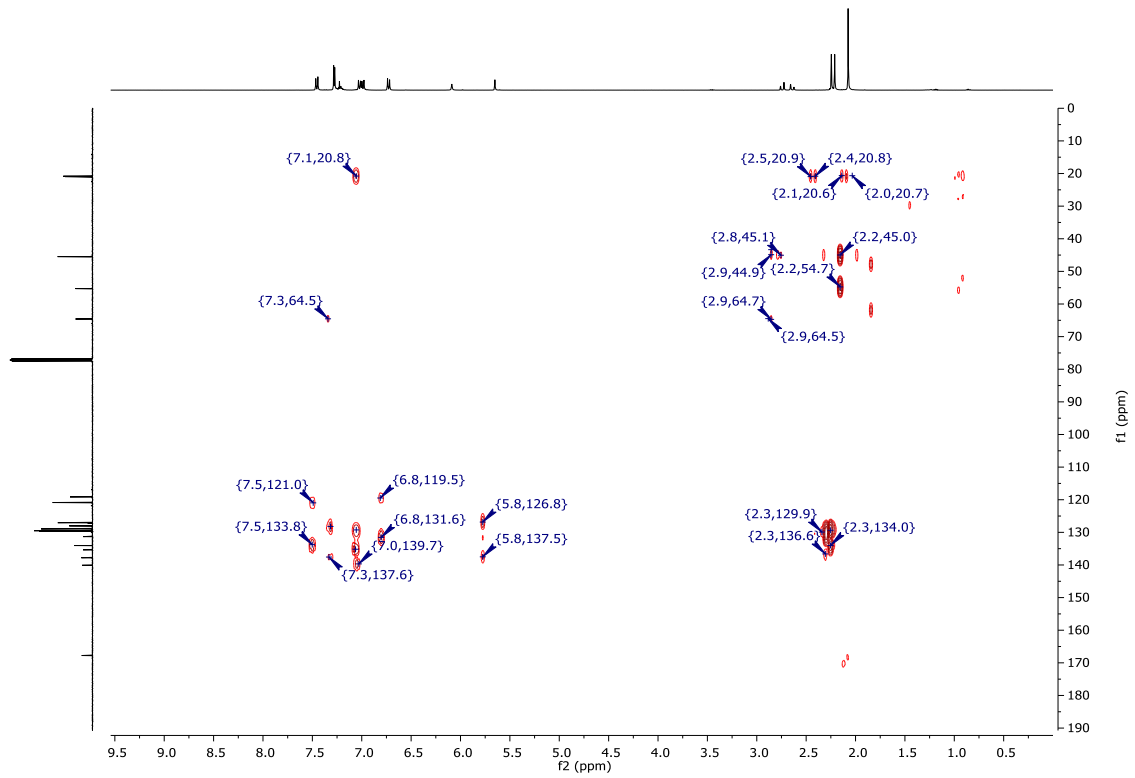

**(2*R*\*,3*R*\*,5'*R*\*,*Z*)-1,1',6'-Tris(4-chlorophenyl)-4-((4-chlorophenyl)imino)-2,5'-diphenyl-3',4',5',6'-tetrahydrospiro[pyrrolidine-3,2'-pyrrolo[3,4-*b*]pyridine]-5,7'(1'*H*)-dione (5b)**

2D-COSY NMR  $\{^1\text{H} - ^1\text{H}\}$  (400 MHz,  $\text{CDCl}_3$ )

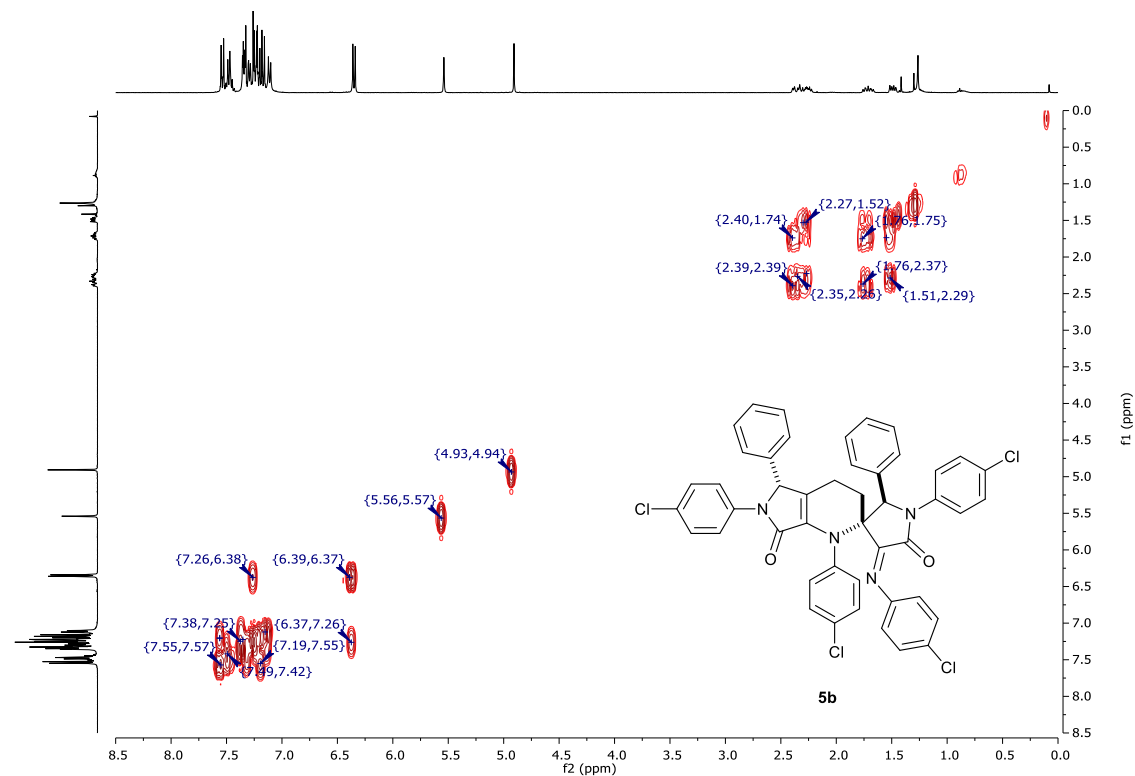

2D-HSQC NMR  $\{^1\text{H} - ^{13}\text{C}\}$  ( $^1\text{H}$ : 400 MHz,  $^{13}\text{C}$ : 101 MHz,  $\text{CDCl}_3$ )

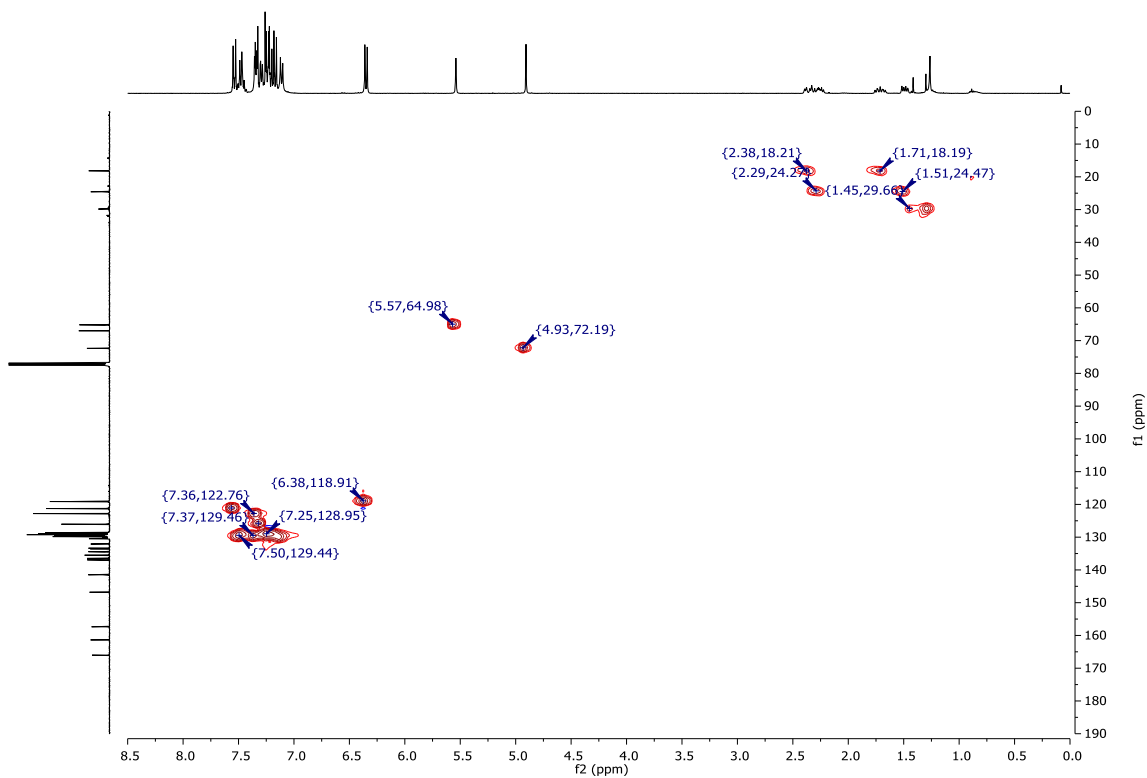



2D-HMBC NMR  $\{^1\text{H} - ^{13}\text{C}\}$  ( $^1\text{H}$ : 400 MHz,  $^{13}\text{C}$ : 101 MHz,  $\text{CDCl}_3$ )

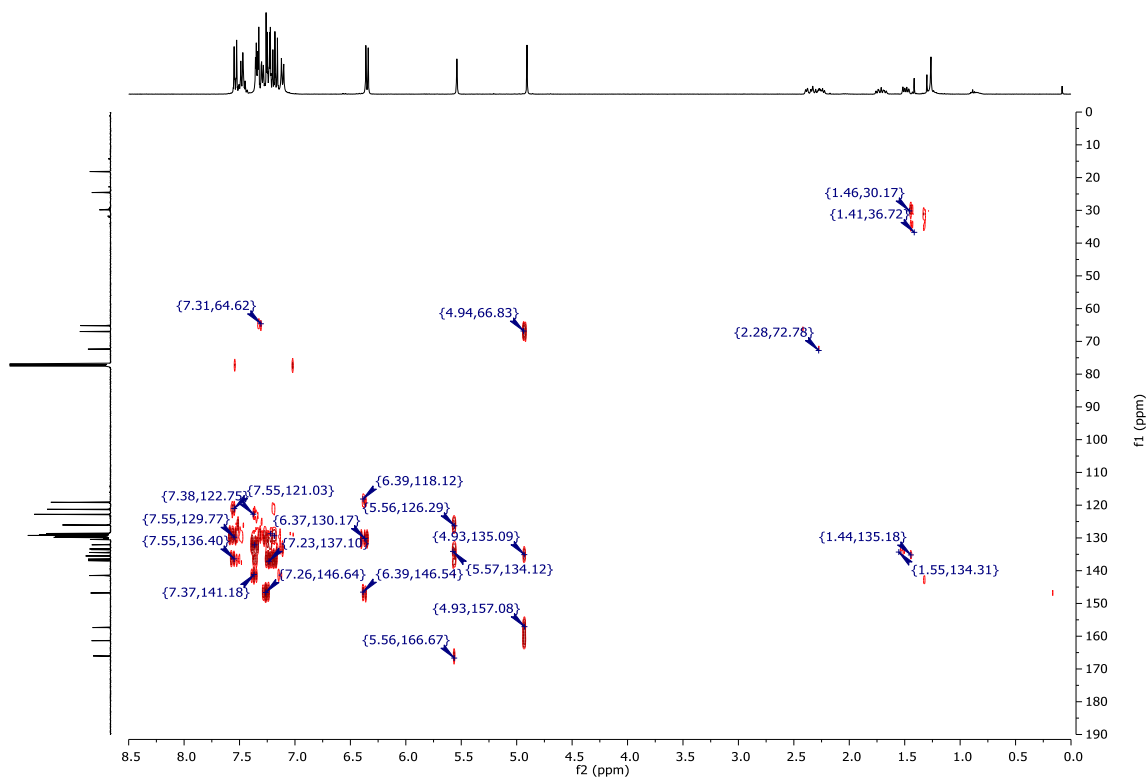

## VII. Computational methods

Theoretical calculations have been carried out within the DFT framework.<sup>9</sup> Reaction profiles analysis have been carried out at the M06-2X-GD3(PCM)/6-31G\* level by using the GAUSSIAN 16<sup>10</sup> suite of programs. Single point energy calculations have been computed at M06-2X(PCM)/6-31+G\*\* from previously optimized structures. This highly parameterized method, well suited for the treatment of nonbonding interactions.<sup>11</sup> Thermal Gibbs corrections were computed at the same level, at the selected temperature, and were not scaled. Solvent effects were estimated by the polarization continuum model<sup>12</sup> (PCM) method within the self-consistent reaction field (SCRf) approach.<sup>13</sup> All SCRf-PCM calculations were performed using chloroform ( $\epsilon = 4.7113$ ) as model solvent.

All the stationary points were characterized by harmonic vibrational analysis. Local minima showed positive definite Hessians. Fully optimized transition structures showed only one imaginary frequency associated with nuclear motion along the chemical transformation under study. Reaction paths were checked by intrinsic reaction coordinates (IRC) calculations. Activation Gibbs free energies were computed by using stationary points directly connected by IRC calculations.

Representation of the non covalent interactions (NCI plots) were computed using NCIPLOT<sup>14</sup> program using wavefunctions computed at M06-2X-GD3(PCM)/6-31G\* level of optimized structures.

Reaction profiles were analyzed using the distortion/interaction activation strain (ASM) – distortion/interaction model<sup>15</sup> developed by Bickelhaupt – Houk computed at the ZORA–M06-2X-GD3/TZ2P level of theory using the AMS2021<sup>16</sup> suite of programs using previously optimized geometries.

<sup>9</sup> R. G. Parr and W. Yang. *Density-Functional Theory of Atoms and Molecules*, Oxford, New York, 1989.

<sup>10</sup> Gaussian16, Revision C.01, M. J. Frisch, G. W. Trucks, H. B. Schlegel, G. E. Scuseria, M. A. Robb, J. R. Cheeseman, G. Scalmani, V. Barone, G. A. Petersson, H. Nakatsuji, X. Li, M. Caricato, A. V. Marenich, J. Bloino, B. G. Janesko, R. Gomperts, B. Mennucci, H. P. Hratchian, J. V. Ortiz, A. F. Izmaylov, J. L. Sonnenberg, D. Williams-Young, F. Ding, F. Lipparini, F. Egidi, J. Goings, B. Peng, A. Petrone, T. Henderson, D. Ranasinghe, V. G. Zakrzewski, J. Gao, N. Rega, G. Zheng, W. Liang, M. Hada, M. Ehara, K. Toyota, R. Fukuda, J. Hasegawa, M. Ishida, T. Nakajima, Y. Honda, O. Kitao, H. Nakai, T. Vreven, K. Throssell, J. A. Montgomery Jr., J. E. Peralta, F. Ogliaro, M. J. Bearpark, J. J. Heyd, E. N. Brothers, K. N. Kudin, V. N. Staroverov, T. A. Keith, R. Kobayashi, J. Normand, K. Raghavachari, A. P. Rendell, J. C. Burant, S. S. Iyengar, J. Tomasi, M. Cossi, J. M. Millam, M. Klene, C. Adamo, R. Cammi, J. W. Ochterski, R. L. Martin, K. Morokuma, O. Farkas, J. B. Foresman and D. J. Fox. Gaussian Inc., Wallingford CT, 2016.

<sup>11</sup> (a) Y. Zhao and D. G. Truhlar. Density Functionals with Broad Applicability in Chemistry *Acc. Chem. Res.*, 2008, **41**, 157-167. <http://doi.org/10.1021/ar700111a>. (b) Y. Zhao and D. G. Truhlar. The M06 suite of density functionals for main group thermochemistry, thermochemical kinetics, noncovalent interactions, excited states, and transition elements: Two new functionals and systematic testing of four M06-class functionals and 12 other functionals. *Theor. Chem. Acc.*, 2008, **120**, 215-241. <http://doi.10.1007/s00214-007-0310-x>.

<sup>12</sup> R. Cammi, B. Mennucci and J. Tomasi. Fast Evaluation of Geometries and Properties of Excited Molecules in Solution: A Tamm-Dancoff Model with Application to 4-Dimethylaminobenzonitrile. *J. Phys. Chem. A*, 2000, **104**, 5631-5637. <https://doi.org/10.1021/jp000156l>.

<sup>13</sup> J. Tomasi, B. Mennucci, and R. Cammi. Quantum Mechanical Continuum Solvation Models. *Chem. Rev.*, 2005, **105**, 2999-3093. <https://doi.org/10.1021/cr9904009>.

<sup>14</sup> (a) J. Contreras-Garcia, E. R. Johnson, S. Keinan, R. Chaudret, J-P. Piquemal, D. N. Beratan and W. Yang. NCIPLOT: A Program for Plotting Noncovalent Interaction Regions. *J. Chem. Theory Comput.*, 2011, **7**, 625-632. <https://doi.org/10.1021/ct100641a>. (b) E. R. Johnson, S. Keinan, P. Mori-Sanchez, J. Contreras-Garcia, A. J. Cohen and W. Yang. Revealing Noncovalent Interactions. *J. Am. Chem. Soc.*, 2010, **132**, 6498-6506. <https://doi.org/10.1021/ja100936w>.

<sup>15</sup> P. Vermeeren, T. A. Hamlin and F. M. Bickelhaupt. Chemical reactivity from an activation strain perspective. *Chem. Commun.*, 2021, **57**, 5880-5896, <https://doi.org/10.1039/D1CC02042K>. (b) F. M. Bickelhaupt and K N. Houk. Analyzing Reaction Rates with the Distortion/Interaction-Activation Strain Model. *Angew. Chem. Int. Ed.*, 2017, **56**, 10070-

The energy of the computed stationary points along the reaction coordinate ( $\Delta E(\zeta)$ ) was decomposed as:

$$\Delta E(\zeta) = \Delta E_{\text{strain}}(\zeta) + \Delta E_{\text{int}}(\zeta) \quad (1)$$

where  $\Delta E_{\text{strain}}(\zeta)$  and  $\Delta E_{\text{int}}(\zeta)$  correspond to the strain and interaction energy, respectively. The strain energy is associated with the energy required to deform the reactants from their equilibrium geometry to the geometry they adopt in that stationary point of the reaction coordinate  $\zeta$ . This term is dependent of reactants the rigidity and, in general, is positive (destabilizing) giving rise to the occurrence of the reaction barrier. On the other hand, the interaction term  $\Delta E_{\text{int}}(\zeta)$  depends on the electronic structure of the reagents and on how they approach each other. This latter term can be further analyzed within the Kohn–Sham MO conceptual framework according to the canonical energy decomposition analysis (EDA)<sup>17</sup> as:

$$\Delta E_{\text{int}}(\zeta) = \Delta E_{\text{Pauli}}(\zeta) + \Delta V_{\text{elstat}}(\zeta) + \Delta E_{\text{oi}}(\zeta) + \Delta E_{\text{disp}}(\zeta) \quad (2)$$

$\Delta V_{\text{elstat}}$  is the classical Coulombic interaction between the unperturbed charge distributions of each of the two reactants.  $\Delta E_{\text{Pauli}}$  is the Pauli repulsions between occupied orbitals of the two fragments and is responsible for steric repulsion.  $\Delta E_{\text{oi}}$  stands for the stabilizing orbital interaction energy, including charge transfer.  $\Delta E_{\text{disp}}$  takes into account the dispersion energy.

**Table S5.** Energy decomposition analysis terms (in kcal mol<sup>-1</sup>) computed at the ZORA–M06-2X-GD3/ZV2P level of selected stationary points discussed in the main text.

| Structure                      | $\Delta E_{\text{Pauli}}(\zeta)$ | $\Delta V_{\text{elstat}}(\zeta)$ | $\Delta E_{\text{oi}}(\zeta)$ | $\Delta E_{\text{disp}}(\zeta)$ |
|--------------------------------|----------------------------------|-----------------------------------|-------------------------------|---------------------------------|
| <b>AA</b> <sub>homo</sub>      | 18.9                             | -23.6                             | -12.4                         | -27.1                           |
| <b>AA</b> <sub>hetero</sub>    | 19.8                             | -25.0                             | -15.1                         | -25.0                           |
| <b>AA</b> <sub>homo-inin</sub> | 23.1                             | -18.9                             | -14.3                         | -21.4                           |
| <b>RCa</b> <sub>homo</sub>     | 17.2                             | -25.1                             | -12.2                         | -26.1                           |
| <b>RCa</b> <sub>hetero</sub>   | 15.6                             | -22.0                             | -11.9                         | -24.9                           |
| <b>RCf</b> <sub>homo</sub>     | 14.2                             | -21.1                             | -12.0                         | -24.6                           |
| <b>RCf</b> <sub>hetero</sub>   | 13.2                             | -20.8                             | -10.2                         | -22.5                           |
| <b>TSa</b> <sub>homo</sub>     | 110.3                            | -68.3                             | -69.0                         | -28.8                           |
| <b>TSa</b> <sub>hetero</sub>   | 122.5                            | -70.5                             | -75.4                         | -24.4                           |
| <b>TSf</b> <sub>homo</sub>     | 108.5                            | -69.5                             | -68.9                         | -24.7                           |
| <b>TSf</b> <sub>hetero</sub>   | 120.8                            | -70.4                             | -73.6                         | -24.3                           |

10086, <https://doi.org/10.1002/anie.201701486>. (c) D. H. Ess and K. N. Houk. Distortion/Interaction Energy Control of 1,3-Dipolar Cycloaddition Reactivity. *J. Am. Chem. Soc.*, 2007, **129**, 10646-10647, <https://doi.org/10.1021/ja0734086>. (d) F. M. Bickelhaupt. Understanding reactivity with Kohn–Sham molecular orbital theory: E2– SN2 mechanistic spectrum and other concepts. *J. Comput. Chem.*, 1999, **20**, 114-128, [https://doi.org/10.1002/\(SICI\)1096-987X\(19990115\)20:1<114::AID-JCC12>3.0.CO;2-L](https://doi.org/10.1002/(SICI)1096-987X(19990115)20:1<114::AID-JCC12>3.0.CO;2-L).

<sup>16</sup> ASM2021, SCM, Theoretical Chemistry, Vrije Universiteit, Amsterdam, The Netherlands, <http://www.scm.com>.

<sup>17</sup> (a) T. A. Hamlin, P. Vermeeren, C. Fonseca Guerra and F. M. Bickelhaupt. *Energy decomposition analysis in the context of quantitative molecular orbital theory*. In *Complementary Bonding Analysis*. Grabowsky S. Ed.; De Gruyter Berlin, 2021; pp. 199-212, <https://doi.org/10.1515/9783110660074-008>. (b) F. M. Bickelhaupt and E. J. Baerends. *Kohn-Sham Density Functional Theory: Predicting and Understanding Chemistry*. In *Reviews in computational chemistry*, Lipkowitz, K. B.; Boyd, D. B., Eds.; Wiley: Hoboken, 2000; pp 1-86, <https://doi.org/10.1002/9780470125922.ch1>.

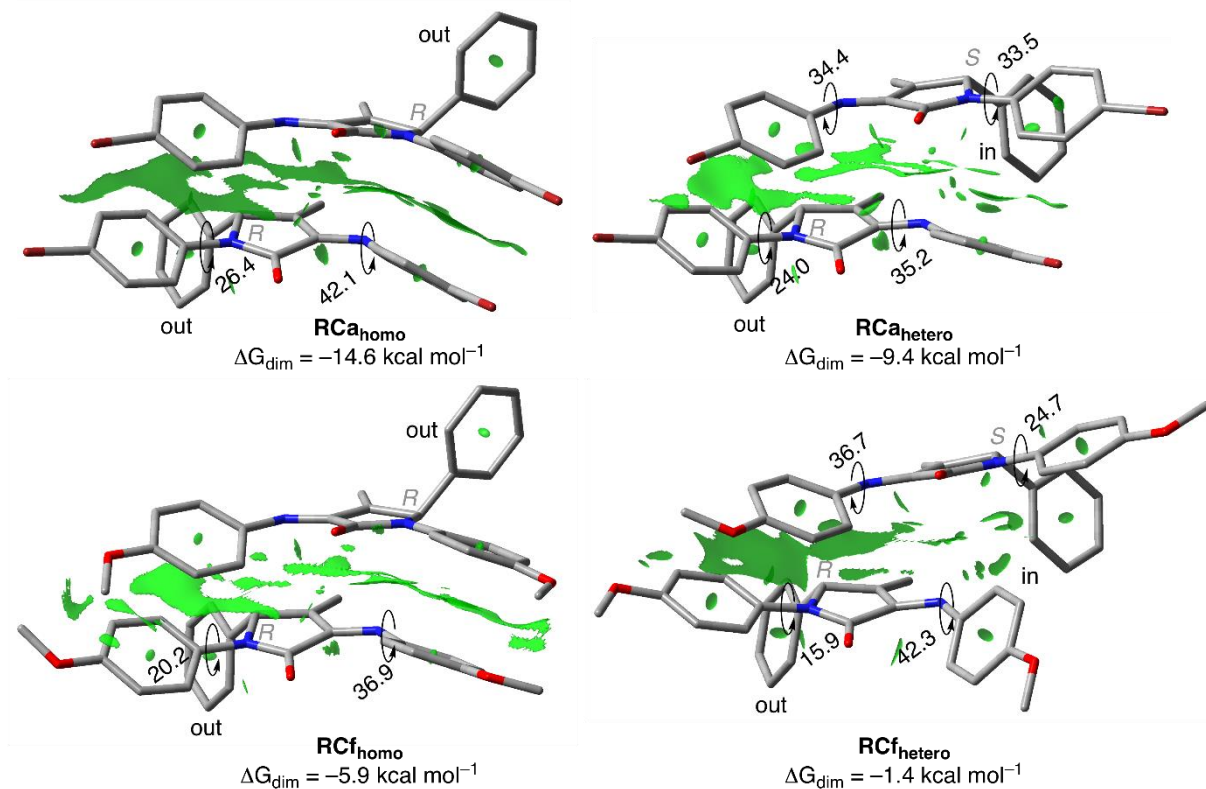

**Figure S3.** Contour plots of the reduced density gradient isosurfaces (RGD, density cutoff = 0.20 au) for the most stable dimeric reactive complexes and Gibbs binding free energies ( $\Delta G_{\text{b}}$ ) computed at M06-2X-GD3 (PCM)/6-31+G\*\* // M06-2X-GD3 (PCM)/6-31G\* level of theory. Dihedral angles are in deg. The green surfaces indicate attractive non-covalent interactions.

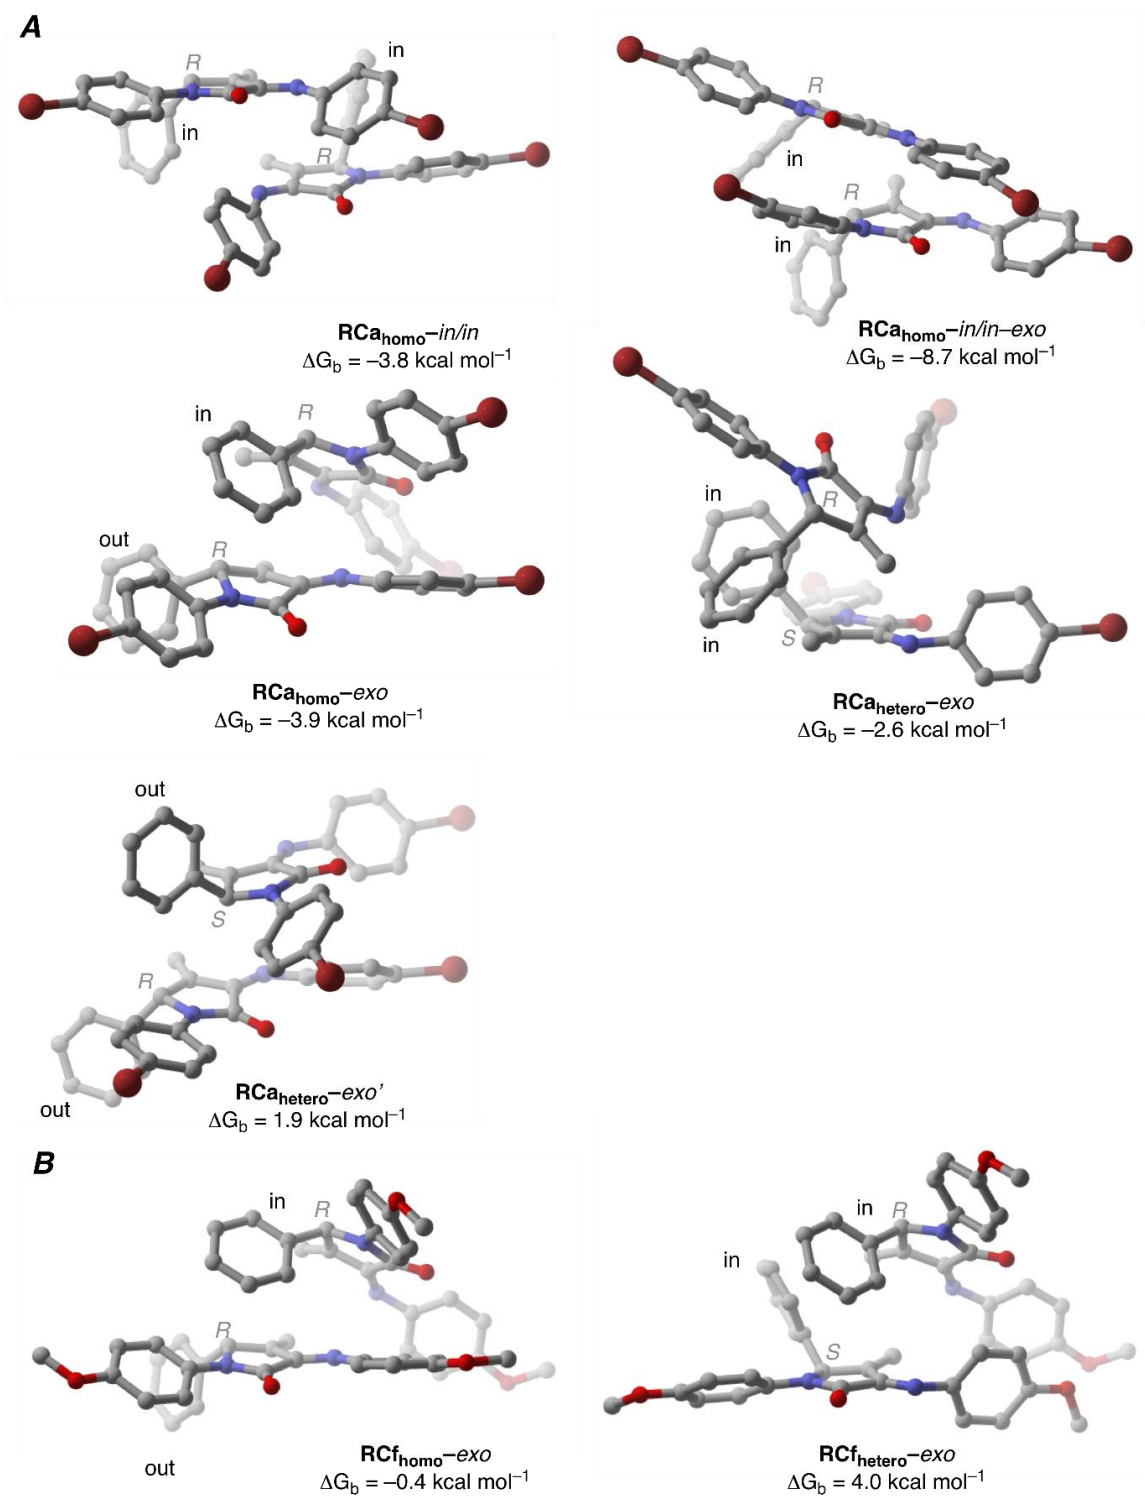

**Figure S4.** Main geometrical features and Gibbs binding free energies ( $\Delta G_b$ ) of all other computed reactive complexes of azadienes (A) **4a** and (B) **4f** computed at M06-2X-GD3(PCM)/6-31+G\*\* // M06-2X-GD3(PCM)/6-31G\* level of theory. See main manuscript for  $\Delta G_b$  definition.

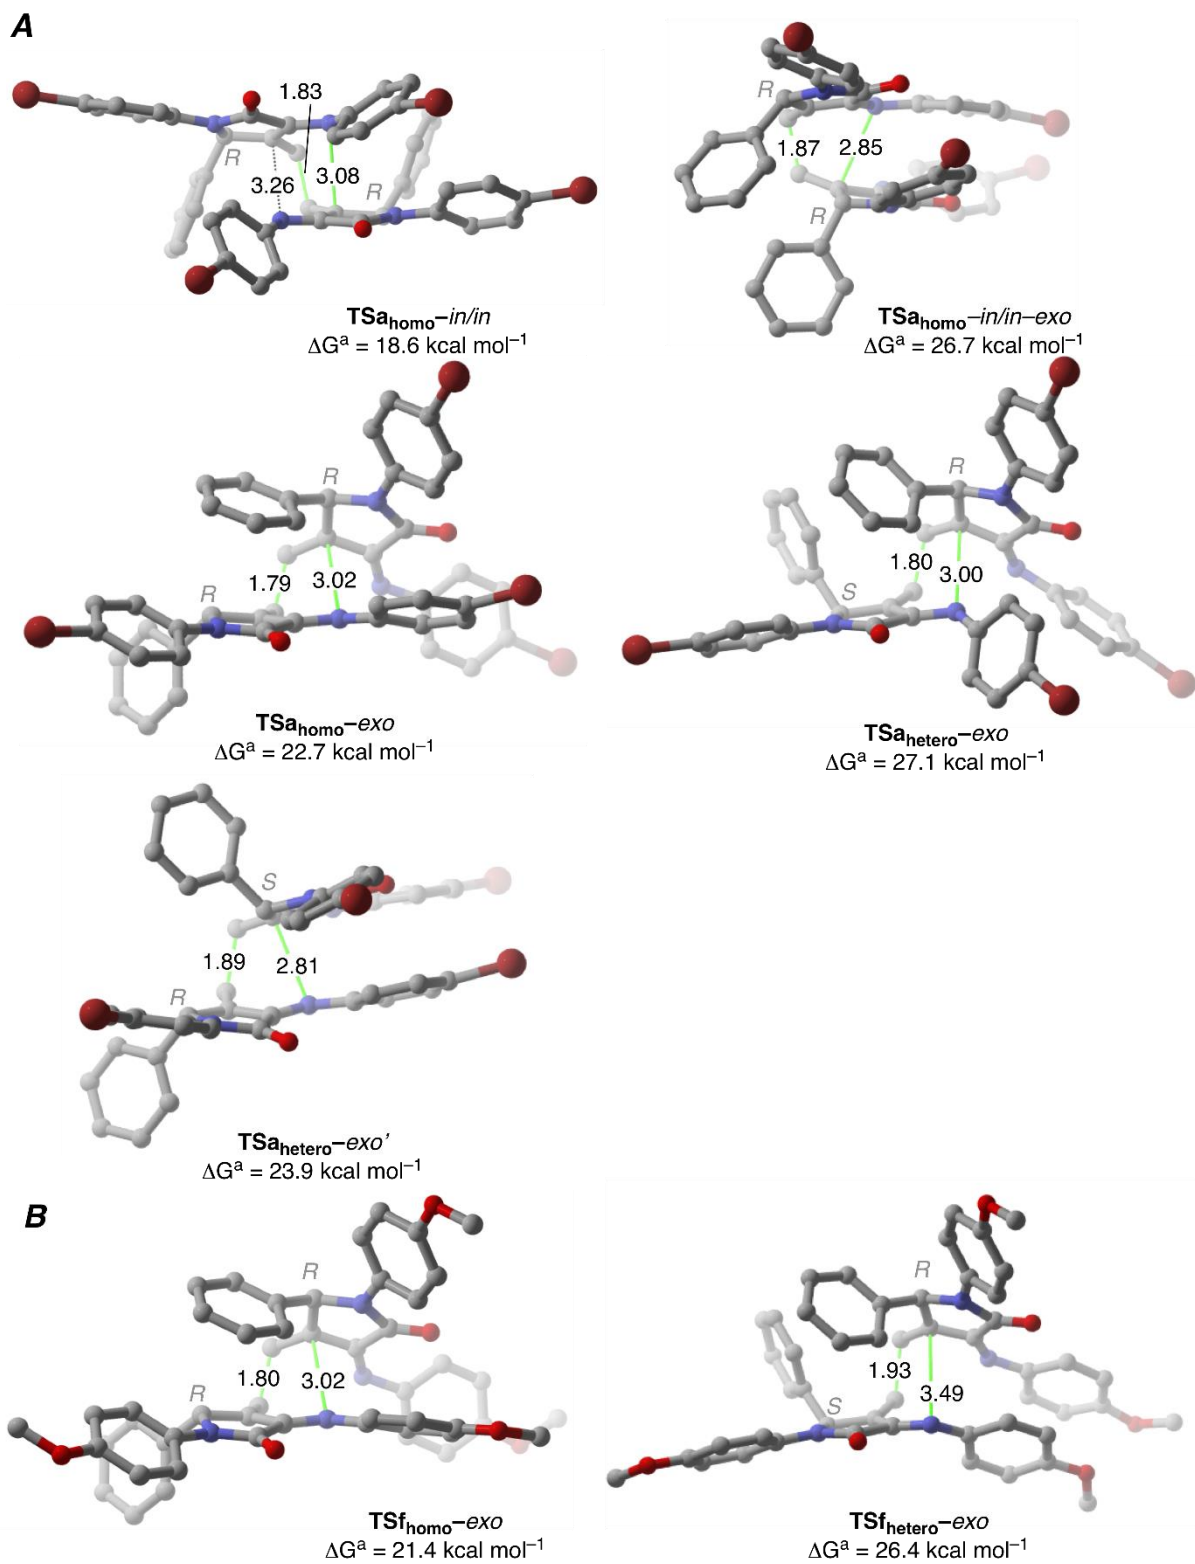

**Figure S5.** Main geometrical features and Gibbs activation energies computed of all other transition structures associated with the Diels-Alder dimerization of the azadienes **4a** (A) and **4f** (B) computed at M06-2X-GD3(PCM)/6-31+G\*\* // M06-2X-GD3(PCM)/6-31G\* level of theory. Distances are in Å.

Evaluation of the reaction profiles associated with less sterically demanding brominated  $\gamma$ -lactams **4g** and **4h**

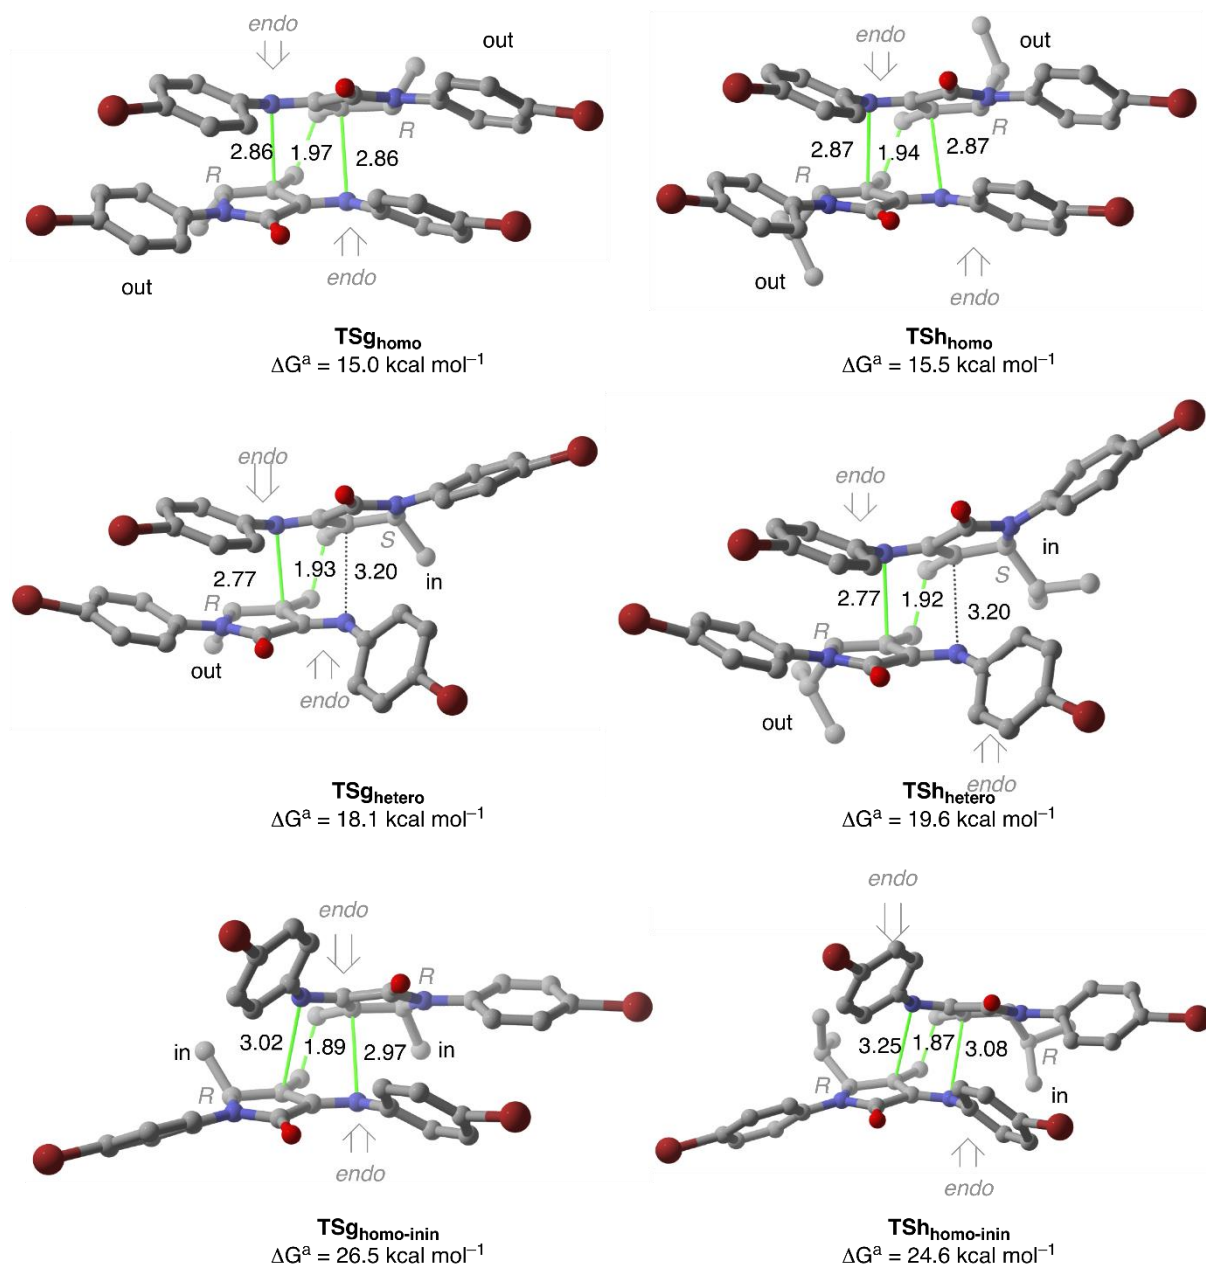

**Figure S6.** Main geometrical features and Gibbs activation energies computed of transition structures associated with the Diels–Alder dimerization of the  $\gamma$ -lactams **4g** and **4h** computed at M06-2X-GD3 (PCM)/6-31+G\*\* // M06-2X-GD3 (PCM)/6-31G\* level of theory. Distances are in Å.

**Table S6.** Total electronic energies<sup>a</sup> (E, in a.u.), a zero point correction of the energy<sup>b</sup> (ZPE), thermal corrections to Gibbs free energies<sup>b</sup> (TCGFE, in a.u.), and number of imaginary frequencies<sup>c</sup> (NIMAG) of all stationary points discussed in the main text optimized at the M06-2X-GD3(PCM, solvent=chloroform)/6-31G\* level of theory.

| Structure                            | E             | ZPC <sup>b</sup> | TCGFE <sup>b</sup> | NIMAG <sup>c</sup> (2) |
|--------------------------------------|---------------|------------------|--------------------|------------------------|
| <b>3a</b> -R                         | -6443.069942  | 0.402704         | 0.337732           | 0                      |
| <b>3a</b> -S                         | -6443.061253  | 0.402655         | 0.337078           | 0                      |
| <b>AAa</b> <sub>homo</sub>           | -12886.194557 | 0.807344         | 0.709917           | 0                      |
| <b>AAa</b> <sub>hetero</sub>         | -12886.183773 | 0.815263         | 0.718809           | 0                      |
| <b>AAa</b> <sub>homo-inin</sub>      | -12886.138760 | 0.807927         | 0.707902           |                        |
| <b>3f</b> -R                         | -1529.624136  | 0.489684         | 0.424507           | 0                      |
| <b>3f</b> -S                         | -1529.614525  | 0.489380         | 0.422872           | 0                      |
| <b>AAf</b> <sub>homo</sub>           | -3059.264276  | 0.980993         | 0.876095           | 0                      |
| <b>AAf</b> <sub>hetero</sub>         | -3059.254862  | 0.982012         | 0.882864           | 0                      |
| <b>AAf</b> <sub>homo-inin</sub>      | -3059.243458  | 0.981007         | 0.880064           | 0                      |
| <b>4f</b> -R                         | -6214.028288  | 0.334777         | 0.275856           | 0                      |
| <b>4f</b> -S                         | -6214.028288  | 0.334780         | 0.275867           | 0                      |
| <b>RCa</b> <sub>homo</sub>           | -12428.109777 | 0.671122         | 0.581642           | 0                      |
| <b>RCa</b> <sub>hetero</sub>         | -12428.103466 | 0.671905         | 0.583647           | 0                      |
| <b>RCa</b> <sub>homo-in/in</sub>     | -12428.092348 | 0.671509         | 0.580711           | 0                      |
| <b>RCa</b> <sub>homo-exo</sub>       | -12428.093692 | 0.671945         | 0.582731           | 0                      |
| <b>RCa</b> <sub>hetero-exo</sub>     | -12428.090846 | 0.671819         | 0.581854           | 0                      |
| <b>RCa</b> <sub>hetero-exo'</sub>    | -12428.089542 | 0.671537         | 0.579487           | 0                      |
| <b>RCa</b> <sub>homo-in/in-exo</sub> | -12428.098943 | 0.672818         | 0.586973           | 0                      |
| <b>TSa</b> <sub>homo</sub>           | -12428.090668 | 0.672722         | 0.588063           | 1 (-421.6719)          |
| <b>TSa</b> <sub>hetero</sub>         | -12428.075359 | 0.672352         | 0.585649           | 1 (-449.0093)          |
| <b>TSa</b> <sub>homo-in/in</sub>     | -12428.066963 | 0.672251         | 0.584946           | 1 (-352.7070)          |
| <b>TSa</b> <sub>homo-exo</sub>       | -12428.058262 | 0.672037         | 0.583506           | 1 (-322.4270)          |
| <b>TSa</b> <sub>hetero-exo</sub>     | -12428.050903 | 0.672339         | 0.585031           | 1 (-330.2563)          |
| <b>TSa</b> <sub>hetero-exo'</sub>    | -12428.053441 | 0.672095         | 0.581490           | 1 (-442.8781)          |
| <b>TSa</b> <sub>homo-in/in-exo</sub> | -12428.059932 | 0.673430         | 0.590582           | 1 (-439.6471)          |
| <b>5a</b> <sub>homo</sub>            | -12428.138629 | 0.677417         | 0.592482           | 0                      |
| <b>5a</b> <sub>hetero</sub>          | -12428.132423 | 0.677410         | 0.593003           | 0                      |
| <b>5a</b> <sub>homo-in/in</sub>      | -12428.130832 | 0.677388         | 0.588210           | 0                      |
| <b>5a</b> <sub>homo-exo</sub>        | -12428.143707 | 0.676505         | 0.586140           | 0                      |
| <b>5a</b> <sub>hetero-exo</sub>      | -12428.133161 | 0.677277         | 0.589493           | 0                      |
| <b>5a</b> <sub>hetero-exo'</sub>     | -12428.139966 | 0.677084         | 0.587122           | 0                      |
| <b>5a</b> <sub>homo-in/in-exo</sub>  | -12428.143687 | 0.677474         | 0.588714           | 0                      |
| <b>4f</b> -R                         | -1300.584716  | 0.421832         | 0.363005           | 0                      |
| <b>4f</b> -S                         | -1300.582885  | 0.421689         | 0.362583           | 0                      |
| <b>RCf</b> <sub>homo</sub>           | -2601.210531  | 0.845779         | 0.757677           | 0                      |
| <b>RCf</b> <sub>hetero</sub>         | -2601.201051  | 0.846233         | 0.756915           | 0                      |
| <b>RCf</b> <sub>homo-exo</sub>       | -2601.197379  | 0.845357         | 0.753068           | 0                      |
| <b>RCf</b> <sub>hetero-exo</sub>     | -2601.202180  | 0.846624         | 0.757936           | 0                      |
| <b>TSf</b> <sub>homo</sub>           | -2601.189148  | 0.847082         | 0.761785           | 1 (-442.4727)          |
| <b>TSf</b> <sub>hetero</sub>         | -2601.178130  | 0.846868         | 0.760705           | 1 (-470.3287)          |
| <b>TSf</b> <sub>homo-exo</sub>       | -2601.165158  | 0.845398         | 0.755006           | 1 (-381.6358)          |



|                                  |               |          |          |               |
|----------------------------------|---------------|----------|----------|---------------|
| <b>TS</b> <sub>hetero-EXO</sub>  | -2601.162711  | 0.846376 | 0.760478 | 1 (-578.6753) |
| <b>5f</b> <sub>homo</sub>        | -2601.236495  | 0.851607 | 0.767972 | 0             |
| <b>5f</b> <sub>hetero</sub>      | -2601.247537  | 0.851401 | 0.762454 | 0             |
| <b>5f</b> <sub>homo-EXO</sub>    | -2601.249844  | 0.850269 | 0.758630 | 0             |
| <b>5f</b> <sub>hetero-EXO</sub>  | -2601.240642  | 0.851029 | 0.762234 | 0             |
| <b>RCg</b> <sub>homo</sub>       | -12044.761501 | 0.565007 | 0.487039 | 0             |
| <b>RCg</b> <sub>hetero</sub>     | -12044.751074 | 0.565247 | 0.485266 | 0             |
| <b>RCg</b> <sub>homo-in/in</sub> | -12044.745044 | 0.565248 | 0.484640 | 0             |
| <b>TSg</b> <sub>homo</sub>       | -12044.742529 | 0.566326 | 0.492035 | 1 (-437.7381) |
| <b>TSg</b> <sub>hetero</sub>     | -12044.726459 | 0.566007 | 0.489557 | 1 (-444.2235) |
| <b>TSg</b> <sub>homo-in/in</sub> | -12044.720503 | 0.565947 | 0.488322 | 1 (-433.6041) |
| <b>5g</b> <sub>homo</sub>        | -12044.791901 | 0.570912 | 0.496762 | 0             |
| <b>5g</b> <sub>hetero</sub>      | -12044.795174 | 0.570918 | 0.493964 | 0             |
| <b>5g</b> <sub>homo-in/in</sub>  | -12044.785020 | 0.570807 | 0.491145 | 0             |
| <b>RCh</b> <sub>homo</sub>       | -12201.948434 | 0.680050 | 0.595807 | 0             |
| <b>RCh</b> <sub>hetero</sub>     | -12201.935723 | 0.679861 | 0.593192 | 0             |
| <b>RCh</b> <sub>homo-in/in</sub> | -12201.927983 | 0.679539 | 0.592439 | 0             |
| <b>TSh</b> <sub>homo</sub>       | -12201.928761 | 0.680934 | 0.599238 | 1 (-430.0710) |
| <b>TSh</b> <sub>hetero</sub>     | -12201.909324 | 0.680750 | 0.598108 | 1 (-441.2424) |
| <b>TSh</b> <sub>homo-in/in</sub> | -12201.893755 | 0.680852 | 0.597438 | 1 (-415.9138) |
| <b>5h</b> <sub>homo</sub>        | -12201.977210 | 0.685641 | 0.605767 | 0             |
| <b>5h</b> <sub>hetero</sub>      | -12201.973861 | 0.685686 | 0.603001 | 0             |
| <b>5h</b> <sub>homo-in/in</sub>  | -12201.973213 | 0.684748 | 0.597613 | 0             |

<sup>a</sup>Computed at M06-2X-GD3(PCM, solvent=chloroform)/6-31+G\*\* //M06-2X-GD3(PCM, solvent=chloroform)/6-31G\* level <sup>b</sup>Computed at 298.15K. <sup>c</sup> If NIMAGE is not zero, imaginary frequency is in cm<sup>-1</sup>.

Cartesian coordinates (optimized at the B3LYP-D3(PCM, solvent=THF)/6-31G\*&LanL2DZ) of all the stationary points analyzed.

### 3a-R

| Center Number | Atomic Number | Atomic Type | Coordinates (Angstroms) |           |           |
|---------------|---------------|-------------|-------------------------|-----------|-----------|
|               |               |             | X                       | Y         | Z         |
| 1             | 6             | 0           | 1.653252                | -2.327380 | 0.646816  |
| 2             | 6             | 0           | 1.832322                | -1.190617 | -0.154498 |
| 3             | 6             | 0           | 2.998390                | -1.077675 | -0.923642 |
| 4             | 6             | 0           | 3.964130                | -2.076058 | -0.898645 |
| 5             | 6             | 0           | 3.767172                | -3.197955 | -0.104960 |
| 6             | 6             | 0           | 2.618737                | -3.327284 | 0.664902  |
| 7             | 7             | 0           | 0.874462                | -0.156293 | -0.197828 |
| 8             | 6             | 0           | -0.414300               | -0.215393 | 0.299825  |
| 9             | 6             | 0           | -1.040037               | 1.112201  | -0.011729 |
| 10            | 6             | 0           | -0.138490               | 1.892187  | -0.626962 |
| 11            | 6             | 0           | 1.170070                | 1.155747  | -0.771055 |
| 12            | 6             | 0           | -0.305941               | 3.300324  | -1.086459 |
| 13            | 8             | 0           | 0.225432                | 4.188120  | -0.088423 |
| 14            | 6             | 0           | 1.172142                | 5.069590  | -0.477335 |
| 15            | 8             | 0           | 1.510670                | 5.229593  | -1.624610 |
| 16            | 7             | 0           | -2.302376               | 1.436087  | 0.441519  |
| 17            | 6             | 0           | -3.446837               | 0.642151  | 0.294208  |
| 18            | 6             | 0           | -4.595524               | 0.982028  | 1.017685  |
| 19            | 6             | 0           | -5.760629               | 0.238178  | 0.885118  |
| 20            | 6             | 0           | -5.774601               | -0.860597 | 0.034070  |
| 21            | 6             | 0           | -4.643731               | -1.212101 | -0.693570 |
| 22            | 6             | 0           | -3.485718               | -0.454011 | -0.574101 |
| 23            | 8             | 0           | -0.940972               | -1.142515 | 0.883479  |
| 24            | 6             | 0           | 2.318882                | 1.869069  | -0.073267 |

|    |    |   |           |           |           |
|----|----|---|-----------|-----------|-----------|
| 25 | 6  | 0 | 3.219108  | 2.627872  | -0.818766 |
| 26 | 6  | 0 | 4.251095  | 3.319202  | -0.184180 |
| 27 | 6  | 0 | 4.393792  | 3.240488  | 1.198188  |
| 28 | 6  | 0 | 3.492076  | 2.482213  | 1.947101  |
| 29 | 6  | 0 | 2.454099  | 1.805591  | 1.314938  |
| 30 | 35 | 0 | -7.360479 | -1.886987 | -0.142802 |
| 31 | 35 | 0 | 5.082141  | -4.563138 | -0.069784 |
| 32 | 6  | 0 | 1.733697  | 5.789789  | 0.715458  |
| 33 | 1  | 0 | 0.213772  | 3.476096  | -2.031310 |
| 34 | 1  | 0 | -1.364813 | 3.541541  | -1.214671 |
| 35 | 1  | 0 | 1.407645  | 1.054868  | -1.839351 |
| 36 | 1  | 0 | 3.112614  | 2.684927  | -1.899854 |
| 37 | 1  | 0 | 4.945206  | 3.909634  | -0.773702 |
| 38 | 1  | 0 | 5.203462  | 3.767482  | 1.693067  |
| 39 | 1  | 0 | 3.599278  | 2.417470  | 3.025316  |
| 40 | 1  | 0 | 1.753211  | 1.213118  | 1.897934  |
| 41 | 1  | 0 | 3.170960  | -0.208372 | -1.546708 |
| 42 | 1  | 0 | 4.863168  | -1.977493 | -1.496435 |
| 43 | 1  | 0 | 2.474197  | -4.204882 | 1.285116  |
| 44 | 1  | 0 | 0.762353  | -2.430595 | 1.248333  |
| 45 | 1  | 0 | -2.613966 | -0.715434 | -1.163553 |
| 46 | 1  | 0 | -4.669124 | -2.064658 | -1.363170 |
| 47 | 1  | 0 | -6.648347 | 0.506612  | 1.446766  |
| 48 | 1  | 0 | -4.571209 | 1.830359  | 1.695569  |
| 49 | 1  | 0 | 2.206564  | 5.056075  | 1.374945  |
| 50 | 1  | 0 | 2.466484  | 6.524774  | 0.386533  |
| 51 | 1  | 0 | 0.929130  | 6.276519  | 1.271781  |
| 52 | 1  | 0 | -2.463360 | 2.410810  | 0.659646  |

3a-S

| Center<br>Number | Atomic<br>Number | Atomic<br>Type | Coordinates (Angstroms) |           |           |
|------------------|------------------|----------------|-------------------------|-----------|-----------|
|                  |                  |                | X                       | Y         | Z         |
| 1                | 6                | 0              | -1.196652               | 1.345838  | 1.942645  |
| 2                | 6                | 0              | -1.741998               | 1.845421  | 0.759157  |
| 3                | 6                | 0              | -2.714095               | 2.844317  | 0.813075  |
| 4                | 6                | 0              | -3.138317               | 3.343891  | 2.044107  |
| 5                | 6                | 0              | -2.592775               | 2.842889  | 3.223438  |
| 6                | 6                | 0              | -1.624472               | 1.839861  | 3.170836  |
| 7                | 6                | 0              | -1.214006               | 1.375993  | -0.584580 |
| 8                | 6                | 0              | 0.155318                | 1.949439  | -0.853837 |
| 9                | 6                | 0              | 1.027374                | 0.966812  | -1.116102 |
| 10               | 6                | 0              | 0.308955                | -0.350385 | -1.059630 |
| 11               | 7                | 0              | -0.987224               | -0.064173 | -0.669510 |
| 12               | 6                | 0              | 0.376507                | 3.416035  | -0.703204 |
| 13               | 8                | 0              | -0.696315               | 4.086408  | -1.369003 |
| 14               | 6                | 0              | -1.240726               | 5.226876  | -0.879457 |
| 15               | 6                | 0              | -0.635504               | 5.844222  | 0.356820  |
| 16               | 7                | 0              | 2.348874                | 1.035875  | -1.516074 |
| 17               | 6                | 0              | 3.388556                | 0.286803  | -0.952568 |
| 18               | 6                | 0              | 3.221749                | -0.441195 | 0.230514  |
| 19               | 6                | 0              | 4.278553                | -1.171555 | 0.759601  |
| 20               | 6                | 0              | 5.512979                | -1.156699 | 0.121729  |
| 21               | 6                | 0              | 5.702762                | -0.423137 | -1.043819 |
| 22               | 6                | 0              | 4.639457                | 0.290113  | -1.580998 |
| 23               | 8                | 0              | 0.779653                | -1.439534 | -1.319705 |
| 24               | 6                | 0              | -2.035483               | -0.998270 | -0.542186 |
| 25               | 6                | 0              | -3.363435               | -0.553921 | -0.555771 |
| 26               | 6                | 0              | -4.412160               | -1.454126 | -0.410151 |
| 27               | 6                | 0              | -4.136125               | -2.805271 | -0.252534 |
| 28               | 6                | 0              | -2.824820               | -3.263772 | -0.232563 |
| 29               | 6                | 0              | -1.774123               | -2.365120 | -0.372115 |
| 30               | 35               | 0              | -5.565177               | -4.035761 | -0.057023 |
| 31               | 35               | 0              | 6.958533                | -2.141890 | 0.856015  |
| 32               | 8                | 0              | -2.193471               | 5.684423  | -1.456340 |
| 33               | 1                | 0              | -1.904745               | 1.694579  | -1.376973 |
| 34               | 1                | 0              | 0.375987                | 3.656158  | 0.364971  |
| 35               | 1                | 0              | -3.139995               | 3.233276  | -0.109910 |
| 36               | 1                | 0              | -3.896656               | 4.119758  | 2.077969  |
| 37               | 1                | 0              | -2.924273               | 3.227905  | 4.182488  |
| 38               | 1                | 0              | -1.201545               | 1.443649  | 4.088522  |

|    |   |   |           |           |           |
|----|---|---|-----------|-----------|-----------|
| 39 | 1 | 0 | -0.440321 | 0.565496  | 1.897138  |
| 40 | 1 | 0 | -0.754934 | -2.723447 | -0.357019 |
| 41 | 1 | 0 | -2.618487 | -4.320471 | -0.103633 |
| 42 | 1 | 0 | -5.437045 | -1.100918 | -0.421478 |
| 43 | 1 | 0 | -3.596895 | 0.497368  | -0.674866 |
| 44 | 1 | 0 | 2.268532  | -0.432033 | 0.748098  |
| 45 | 1 | 0 | 4.144464  | -1.738476 | 1.674173  |
| 46 | 1 | 0 | 6.669887  | -0.415473 | -1.534229 |
| 47 | 1 | 0 | 4.775648  | 0.848758  | -2.502432 |
| 48 | 1 | 0 | 1.331732  | 3.736007  | -1.129978 |
| 49 | 1 | 0 | -0.848983 | 5.219528  | 1.231162  |
| 50 | 1 | 0 | 0.447899  | 5.956819  | 0.268944  |
| 51 | 1 | 0 | -1.097957 | 6.819332  | 0.499331  |
| 52 | 1 | 0 | 2.624636  | 1.867355  | -2.021976 |

-----  
**AAa<sub>homo</sub>**  
 -----

| Center<br>Number | Atomic<br>Number | Atomic<br>Type | Coordinates (Angstroms) |           |           |
|------------------|------------------|----------------|-------------------------|-----------|-----------|
|                  |                  |                | X                       | Y         | Z         |
| 1                | 6                | 0              | -1.594160               | -1.643119 | 1.316610  |
| 2                | 6                | 0              | -1.765442               | -0.895712 | 2.483527  |
| 3                | 6                | 0              | -2.852035               | -1.179936 | 3.320929  |
| 4                | 6                | 0              | -3.754205               | -2.182291 | 2.990653  |
| 5                | 6                | 0              | -3.564282               | -2.915839 | 1.824041  |
| 6                | 6                | 0              | -2.485806               | -2.655968 | 0.988601  |
| 7                | 7                | 0              | -0.910934               | 0.158799  | 2.832361  |
| 8                | 6                | 0              | 0.227993                | 0.546173  | 2.149569  |
| 9                | 6                | 0              | 0.621876                | 1.787668  | 1.808070  |
| 10               | 6                | 0              | 2.024155                | 1.745458  | 1.242652  |
| 11               | 7                | 0              | 2.322052                | 0.309663  | 1.241143  |
| 12               | 6                | 0              | 1.323720                | -0.430622 | 1.826167  |
| 13               | 6                | 0              | -0.187158               | 3.042661  | 1.919807  |
| 14               | 8                | 0              | 1.327125                | -1.630412 | 2.033376  |
| 15               | 6                | 0              | 3.568300                | -0.202155 | 0.817045  |
| 16               | 6                | 0              | 4.183390                | 0.352876  | -0.306711 |
| 17               | 6                | 0              | 5.392399                | -0.153886 | -0.765941 |
| 18               | 6                | 0              | 5.979169                | -1.219415 | -0.096104 |
| 19               | 6                | 0              | 5.386639                | -1.774537 | 1.031717  |
| 20               | 6                | 0              | 4.182290                | -1.257949 | 1.496019  |
| 21               | 6                | 0              | 3.077503                | 2.488489  | 2.055004  |
| 22               | 6                | 0              | 3.992381                | 3.331595  | 1.426675  |
| 23               | 6                | 0              | 4.996621                | 3.957011  | 2.164412  |
| 24               | 6                | 0              | 5.089299                | 3.740607  | 3.536560  |
| 25               | 6                | 0              | 4.172787                | 2.900051  | 4.170370  |
| 26               | 6                | 0              | 3.172752                | 2.275966  | 3.431727  |
| 27               | 35               | 0              | 7.593755                | -1.950575 | -0.759148 |
| 28               | 35               | 0              | -4.807804               | -4.265217 | 1.355788  |
| 29               | 6                | 0              | 0.186786                | 3.043143  | -1.920514 |
| 30               | 6                | 0              | -0.622011               | 1.787958  | -1.808300 |
| 31               | 6                | 0              | -0.227936               | 0.546467  | -2.149622 |
| 32               | 6                | 0              | -1.323448               | -0.430476 | -1.825951 |
| 33               | 7                | 0              | -2.321826               | 0.309705  | -1.240888 |
| 34               | 6                | 0              | -2.024201               | 1.745561  | -1.242663 |
| 35               | 7                | 0              | 0.911019                | 0.159149  | -2.832350 |
| 36               | 6                | 0              | 1.765566                | -0.895318 | -2.483609 |
| 37               | 6                | 0              | 1.594543                | -1.642629 | -1.316561 |
| 38               | 6                | 0              | 2.486273                | -2.655434 | -0.988643 |
| 39               | 6                | 0              | 3.564598                | -2.915361 | -1.824266 |
| 40               | 6                | 0              | 3.754276                | -2.181912 | -2.990973 |
| 41               | 6                | 0              | 2.852012                | -1.179610 | -3.321185 |
| 42               | 6                | 0              | -3.077830               | 2.488293  | -2.054926 |
| 43               | 6                | 0              | -3.992779               | 3.331257  | -1.426505 |
| 44               | 6                | 0              | -4.997256               | 3.956432  | -2.164117 |
| 45               | 6                | 0              | -5.090101               | 3.739933  | -3.536238 |
| 46               | 6                | 0              | -4.173528               | 2.899515  | -4.170142 |
| 47               | 6                | 0              | -3.173258               | 2.275660  | -3.431619 |
| 48               | 6                | 0              | -3.567987               | -0.202299 | -0.816736 |
| 49               | 6                | 0              | -4.181897               | -1.258129 | -1.495736 |
| 50               | 6                | 0              | -5.386235               | -1.774779 | -1.031488 |
| 51               | 6                | 0              | -5.978832               | -1.219713 | 0.096328  |
| 52               | 6                | 0              | -5.392124               | -0.154186 | 0.766223  |
| 53               | 6                | 0              | -4.183123               | 0.352658  | 0.307028  |
| 54               | 8                | 0              | -1.326680               | -1.630293 | -2.033014 |

|     |    |   |           |           |           |
|-----|----|---|-----------|-----------|-----------|
| 55  | 35 | 0 | -7.593512 | -1.950881 | 0.759153  |
| 56  | 35 | 0 | 4.808247  | -4.264656 | -1.356078 |
| 57  | 1  | 0 | -2.018728 | 2.138181  | -0.216980 |
| 58  | 1  | 0 | -0.471400 | 3.426307  | 0.935008  |
| 59  | 1  | 0 | -1.097888 | 2.859795  | 2.493503  |
| 60  | 1  | 0 | 1.097191  | 2.860392  | -2.494758 |
| 61  | 1  | 0 | 0.471622  | 3.426872  | -0.935924 |
| 62  | 1  | 0 | 2.018772  | 2.137888  | 0.216894  |
| 63  | 1  | 0 | -3.909320 | 3.511267  | -0.357837 |
| 64  | 1  | 0 | -5.705076 | 4.610411  | -1.664809 |
| 65  | 1  | 0 | -5.871975 | 4.224510  | -4.112451 |
| 66  | 1  | 0 | -4.240090 | 2.729062  | -5.239998 |
| 67  | 1  | 0 | -2.460859 | 1.618182  | -3.924654 |
| 68  | 1  | 0 | 3.909045  | 3.511546  | 0.357989  |
| 69  | 1  | 0 | 5.704387  | 4.611103  | 1.665175  |
| 70  | 1  | 0 | 5.870989  | 4.225371  | 4.112864  |
| 71  | 1  | 0 | 4.239211  | 2.729675  | 5.240248  |
| 72  | 1  | 0 | 2.460403  | 1.618381  | 3.924690  |
| 73  | 1  | 0 | 3.703230  | 1.160354  | -0.850338 |
| 74  | 1  | 0 | 5.862317  | 0.261359  | -1.650387 |
| 75  | 1  | 0 | 5.858073  | -2.607601 | 1.540877  |
| 76  | 1  | 0 | 3.705524  | -1.688080 | 2.367401  |
| 77  | 1  | 0 | -3.705098 | -1.688192 | -2.367134 |
| 78  | 1  | 0 | -5.857638 | -2.607823 | -1.540713 |
| 79  | 1  | 0 | -5.862102 | 0.261032  | 1.650650  |
| 80  | 1  | 0 | -3.703037 | 1.160205  | 0.850626  |
| 81  | 1  | 0 | 0.775453  | -1.427852 | -0.643389 |
| 82  | 1  | 0 | 2.353560  | -3.206099 | -0.063792 |
| 83  | 1  | 0 | 4.603339  | -2.389701 | -3.633339 |
| 84  | 1  | 0 | 2.992258  | -0.607401 | -4.234341 |
| 85  | 1  | 0 | -2.992449 | -0.607642 | 4.234004  |
| 86  | 1  | 0 | -4.603380 | -2.390050 | 3.632879  |
| 87  | 1  | 0 | -2.352896 | -3.206709 | 0.063824  |
| 88  | 1  | 0 | -0.774948 | -1.428379 | 0.643577  |
| 89  | 8  | 0 | 0.506505  | 4.079667  | 2.626318  |
| 90  | 6  | 0 | 1.278529  | 4.890082  | 1.876662  |
| 91  | 8  | 0 | 1.384300  | 4.783005  | 0.676395  |
| 92  | 6  | 0 | 1.999574  | 5.885435  | 2.736416  |
| 93  | 1  | 0 | 2.698063  | 5.338594  | 3.378893  |
| 94  | 1  | 0 | 2.546974  | 6.584400  | 2.106304  |
| 95  | 1  | 0 | 1.292096  | 6.416248  | 3.377041  |
| 96  | 8  | 0 | -0.507403 | 4.079999  | -2.626719 |
| 97  | 6  | 0 | -1.279349 | 4.890191  | -1.876724 |
| 98  | 8  | 0 | -1.384682 | 4.782964  | -0.676433 |
| 99  | 6  | 0 | -2.000792 | 5.885569  | -2.736122 |
| 100 | 1  | 0 | -1.293480 | 6.416836  | -3.376564 |
| 101 | 1  | 0 | -2.699112 | 5.338735  | -3.378772 |
| 102 | 1  | 0 | -2.548361 | 6.584179  | -2.105761 |
| 103 | 1  | 0 | -1.318842 | 0.858864  | 3.438365  |
| 104 | 1  | 0 | 1.318718  | 0.859070  | -3.438631 |

-----  
**AAhetero**

| Center<br>Number | Atomic<br>Number | Atomic<br>Type | Coordinates (Angstroms) |           |           |
|------------------|------------------|----------------|-------------------------|-----------|-----------|
|                  |                  |                | X                       | Y         | Z         |
| 1                | 6                | 0              | -4.816442               | -0.172509 | -1.828067 |
| 2                | 6                | 0              | -3.519707               | -0.698992 | -1.816899 |
| 3                | 6                | 0              | -3.337069               | -2.059936 | -1.533825 |
| 4                | 6                | 0              | -4.428720               | -2.865809 | -1.242533 |
| 5                | 6                | 0              | -5.704627               | -2.317540 | -1.215113 |
| 6                | 6                | 0              | -5.907570               | -0.978541 | -1.519311 |
| 7                | 7                | 0              | -2.411140               | 0.149202  | -2.025374 |
| 8                | 6                | 0              | -1.131584               | -0.272877 | -2.326088 |
| 9                | 6                | 0              | -0.273719               | 0.964026  | -2.350054 |
| 10               | 6                | 0              | -1.071652               | 2.038286  | -2.225474 |
| 11               | 6                | 0              | -2.510306               | 1.605218  | -2.050937 |
| 12               | 6                | 0              | -0.727388               | 3.488882  | -2.232773 |
| 13               | 8                | 0              | -1.445349               | 4.094223  | -3.315462 |
| 14               | 6                | 0              | -1.653224               | 5.435453  | -3.336233 |
| 15               | 6                | 0              | -1.127195               | 6.253940  | -2.184393 |
| 16               | 7                | 0              | 1.090341                | 0.908348  | -2.578347 |
| 17               | 6                | 0              | 1.902102                | -0.193479 | -2.259828 |
| 18               | 6                | 0              | 1.652509                | -0.965306 | -1.119619 |

|    |    |   |           |           |           |
|----|----|---|-----------|-----------|-----------|
| 19 | 6  | 0 | 2.436094  | -2.075656 | -0.833552 |
| 20 | 6  | 0 | 3.501983  | -2.393157 | -1.670020 |
| 21 | 6  | 0 | 3.801241  | -1.601572 | -2.772374 |
| 22 | 6  | 0 | 2.999494  | -0.504703 | -3.067554 |
| 23 | 8  | 0 | -0.770744 | -1.406873 | -2.568160 |
| 24 | 6  | 0 | -3.139460 | 2.217604  | -0.812647 |
| 25 | 6  | 0 | -3.845933 | 3.414953  | -0.937384 |
| 26 | 6  | 0 | -4.436428 | 4.003638  | 0.178200  |
| 27 | 6  | 0 | -4.327013 | 3.392366  | 1.424201  |
| 28 | 6  | 0 | -3.609581 | 2.202969  | 1.553308  |
| 29 | 6  | 0 | -3.012259 | 1.615607  | 0.440301  |
| 30 | 35 | 0 | 4.566217  | -3.917252 | -1.308738 |
| 31 | 35 | 0 | -7.171344 | -3.412455 | -0.730176 |
| 32 | 8  | 0 | -2.260612 | 5.895452  | -4.268786 |
| 33 | 6  | 0 | 0.160236  | 2.936119  | 1.037160  |
| 34 | 8  | 0 | -0.522449 | 3.428640  | 2.196270  |
| 35 | 6  | 0 | -1.319486 | 4.490503  | 1.951872  |
| 36 | 6  | 0 | -1.988421 | 4.979786  | 3.203067  |
| 37 | 6  | 0 | 1.002038  | 1.770295  | 1.415511  |
| 38 | 6  | 0 | 0.653161  | 0.705261  | 2.147846  |
| 39 | 6  | 0 | 1.803574  | -0.251234 | 2.198587  |
| 40 | 7  | 0 | 2.833676  | 0.352714  | 1.495520  |
| 41 | 6  | 0 | 2.417741  | 1.626410  | 0.923338  |
| 42 | 7  | 0 | -0.515193 | 0.520214  | 2.877056  |
| 43 | 6  | 0 | -1.394955 | -0.557894 | 2.698263  |
| 44 | 6  | 0 | -2.579865 | -0.565529 | 3.446891  |
| 45 | 6  | 0 | -3.543593 | -1.543105 | 3.245060  |
| 46 | 6  | 0 | -3.311773 | -2.548675 | 2.313029  |
| 47 | 6  | 0 | -2.119960 | -2.589146 | 1.599936  |
| 48 | 6  | 0 | -1.166019 | -1.591742 | 1.782974  |
| 49 | 35 | 0 | -4.643857 | -3.861795 | 2.009996  |
| 50 | 6  | 0 | 3.289156  | 2.799917  | 1.330429  |
| 51 | 6  | 0 | 3.598894  | 3.788855  | 0.397438  |
| 52 | 6  | 0 | 4.343643  | 4.904582  | 0.775577  |
| 53 | 6  | 0 | 4.786945  | 5.028979  | 2.089309  |
| 54 | 6  | 0 | 4.481979  | 4.038493  | 3.023450  |
| 55 | 6  | 0 | 3.731053  | 2.929661  | 2.647577  |
| 56 | 6  | 0 | 4.055582  | -0.250688 | 1.133613  |
| 57 | 6  | 0 | 4.803277  | 0.284981  | 0.079143  |
| 58 | 6  | 0 | 5.962363  | -0.347524 | -0.354781 |
| 59 | 6  | 0 | 6.381967  | -1.509822 | 0.274014  |
| 60 | 6  | 0 | 5.676791  | -2.029339 | 1.352174  |
| 61 | 6  | 0 | 4.519153  | -1.399993 | 1.789457  |
| 62 | 8  | 0 | 1.810850  | -1.345569 | 2.730354  |
| 63 | 35 | 0 | 7.893094  | -2.436667 | -0.386858 |
| 64 | 8  | 0 | -1.421030 | 4.979153  | 0.851572  |
| 65 | 1  | 0 | -3.091907 | 1.916808  | -2.930791 |
| 66 | 1  | 0 | 0.762148  | 3.739074  | 0.598961  |
| 67 | 1  | 0 | -0.592090 | 2.625565  | 0.304066  |
| 68 | 1  | 0 | -1.032849 | 3.947422  | -1.284901 |
| 69 | 1  | 0 | 2.401746  | 1.549195  | -0.175728 |
| 70 | 1  | 0 | -3.951326 | 3.875053  | -1.918074 |
| 71 | 1  | 0 | -4.991361 | 4.929978  | 0.069918  |
| 72 | 1  | 0 | -4.805529 | 3.834713  | 2.292736  |
| 73 | 1  | 0 | -3.544271 | 1.709016  | 2.518323  |
| 74 | 1  | 0 | -2.480428 | 0.669301  | 0.536682  |
| 75 | 1  | 0 | 3.262201  | 3.680705  | -0.632407 |
| 76 | 1  | 0 | 4.582641  | 5.668688  | 0.042678  |
| 77 | 1  | 0 | 5.372703  | 5.893296  | 2.385515  |
| 78 | 1  | 0 | 4.830277  | 4.131335  | 4.047262  |
| 79 | 1  | 0 | 3.491270  | 2.155622  | 3.372292  |
| 80 | 1  | 0 | 4.480906  | 1.180593  | -0.437491 |
| 81 | 1  | 0 | 6.520241  | 0.054688  | -1.193213 |
| 82 | 1  | 0 | 6.017162  | -2.936722 | 1.838668  |
| 83 | 1  | 0 | 3.959191  | -1.815523 | 2.614402  |
| 84 | 1  | 0 | -2.345344 | -2.487151 | -1.542323 |
| 85 | 1  | 0 | -4.279494 | -3.913759 | -1.009436 |
| 86 | 1  | 0 | -6.907120 | -0.558814 | -1.508573 |
| 87 | 1  | 0 | -4.988333 | 0.873946  | -2.052424 |
| 88 | 1  | 0 | 0.827465  | -0.697368 | -0.462035 |
| 89 | 1  | 0 | 2.235911  | -2.672916 | 0.050702  |
| 90 | 1  | 0 | 4.645625  | -1.849042 | -3.406477 |
| 91 | 1  | 0 | 3.209440  | 0.095324  | -3.948660 |
| 92 | 1  | 0 | -0.242069 | -1.632816 | 1.217478  |

|     |   |   |           |           |           |
|-----|---|---|-----------|-----------|-----------|
| 93  | 1 | 0 | -1.936528 | -3.388036 | 0.889679  |
| 94  | 1 | 0 | -4.468139 | -1.525357 | 3.811215  |
| 95  | 1 | 0 | -2.746505 | 0.209803  | 4.190013  |
| 96  | 1 | 0 | 0.351152  | 3.635870  | -2.364322 |
| 97  | 1 | 0 | -0.066344 | 6.058570  | -2.002189 |
| 98  | 1 | 0 | -1.270624 | 7.305229  | -2.428510 |
| 99  | 1 | 0 | -1.667003 | 6.013480  | -1.262326 |
| 100 | 1 | 0 | -2.410416 | 4.141659  | 3.761426  |
| 101 | 1 | 0 | -1.242705 | 5.468030  | 3.837235  |
| 102 | 1 | 0 | -2.768214 | 5.692558  | 2.939041  |
| 103 | 1 | 0 | -0.974694 | 1.396355  | 3.105121  |
| 104 | 1 | 0 | 1.458085  | 1.545879  | -3.273261 |

-----  
**AAa<sub>homo-inin</sub>**  
 -----

| Center<br>Number | Atomic<br>Number | Atomic<br>Type | Coordinates (Angstroms) |           |           |
|------------------|------------------|----------------|-------------------------|-----------|-----------|
|                  |                  |                | X                       | Y         | Z         |
| 1                | 6                | 0              | -5.728269               | 1.062243  | -1.285874 |
| 2                | 6                | 0              | -4.622058               | 0.221975  | -1.459788 |
| 3                | 6                | 0              | -4.815431               | -1.166115 | -1.488991 |
| 4                | 6                | 0              | -6.093751               | -1.694760 | -1.352200 |
| 5                | 6                | 0              | -7.179327               | -0.845920 | -1.178914 |
| 6                | 6                | 0              | -7.004246               | 0.531190  | -1.143571 |
| 7                | 7                | 0              | -3.332132               | 0.785308  | -1.571488 |
| 8                | 6                | 0              | -3.041514               | 2.162422  | -1.169290 |
| 9                | 6                | 0              | -1.569737               | 2.297951  | -1.508425 |
| 10               | 6                | 0              | -1.110956               | 1.153481  | -2.040577 |
| 11               | 6                | 0              | -2.226375               | 0.157887  | -2.108963 |
| 12               | 7                | 0              | 0.096811                | 0.914720  | -2.662837 |
| 13               | 6                | 0              | 0.873179                | -0.245493 | -2.512630 |
| 14               | 6                | 0              | 0.629062                | -1.182992 | -1.505251 |
| 15               | 6                | 0              | 1.464477                | -2.282509 | -1.348754 |
| 16               | 6                | 0              | 2.573639                | -2.418514 | -2.175960 |
| 17               | 6                | 0              | 2.834303                | -1.497351 | -3.183633 |
| 18               | 6                | 0              | 1.970218                | -0.424060 | -3.363268 |
| 19               | 35               | 0              | 3.774887                | -3.858634 | -1.896744 |
| 20               | 6                | 0              | -0.821206               | 3.594237  | -1.389535 |
| 21               | 8                | 0              | -1.791599               | 4.596014  | -1.105666 |
| 22               | 6                | 0              | -1.451811               | 5.867957  | -0.774500 |
| 23               | 6                | 0              | 0.010749                | 6.220598  | -0.734908 |
| 24               | 6                | 0              | -3.392134               | 2.404083  | 0.294841  |
| 25               | 6                | 0              | -3.939135               | 3.619098  | 0.710827  |
| 26               | 6                | 0              | -4.295923               | 3.805354  | 2.045310  |
| 27               | 6                | 0              | -4.100756               | 2.786933  | 2.976455  |
| 28               | 6                | 0              | -3.560970               | 1.568837  | 2.565219  |
| 29               | 6                | 0              | -3.222587               | 1.379861  | 1.227997  |
| 30               | 8                | 0              | -2.168411               | -0.965081 | -2.571315 |
| 31               | 35               | 0              | -8.917778               | -1.574523 | -0.986308 |
| 32               | 8                | 0              | -2.345645               | 6.629006  | -0.510660 |
| 33               | 6                | 0              | 3.044912                | 4.611123  | -0.462400 |
| 34               | 6                | 0              | 2.944888                | 3.783622  | 0.655344  |
| 35               | 6                | 0              | 2.787322                | 2.405007  | 0.496407  |
| 36               | 6                | 0              | 2.749246                | 1.861170  | -0.788117 |
| 37               | 6                | 0              | 2.863474                | 2.688847  | -1.902720 |
| 38               | 6                | 0              | 3.000492                | 4.067778  | -1.744822 |
| 39               | 6                | 0              | 2.619930                | 1.502208  | 1.713671  |
| 40               | 6                | 0              | 1.166561                | 1.206571  | 1.982441  |
| 41               | 6                | 0              | 0.916020                | -0.103402 | 1.843009  |
| 42               | 6                | 0              | 2.205249                | -0.819529 | 1.586005  |
| 43               | 7                | 0              | 3.172382                | 0.165004  | 1.509869  |
| 44               | 7                | 0              | -0.341503               | -0.675618 | 1.809258  |
| 45               | 6                | 0              | -0.676329               | -2.039233 | 1.843415  |
| 46               | 6                | 0              | -0.061412               | -2.924902 | 2.734041  |
| 47               | 6                | 0              | -0.447991               | -4.257117 | 2.768474  |
| 48               | 6                | 0              | -1.470528               | -4.700753 | 1.933840  |
| 49               | 6                | 0              | -2.104985               | -3.831756 | 1.056853  |
| 50               | 6                | 0              | -1.698158               | -2.502701 | 1.008778  |
| 51               | 35               | 0              | -2.007520               | -6.517664 | 2.000640  |
| 52               | 6                | 0              | 0.158894                | 2.275588  | 2.233140  |
| 53               | 8                | 0              | 0.865677                | 3.404241  | 2.743574  |
| 54               | 6                | 0              | 0.349634                | 4.652078  | 2.653422  |
| 55               | 6                | 0              | -1.121486               | 4.777237  | 2.366473  |
| 56               | 6                | 0              | 4.506329                | -0.045311 | 1.097545  |

|     |    |   |           |           |           |
|-----|----|---|-----------|-----------|-----------|
| 57  | 6  | 0 | 5.485518  | 0.899971  | 1.415834  |
| 58  | 6  | 0 | 6.790331  | 0.739306  | 0.962229  |
| 59  | 6  | 0 | 7.113393  | -0.368154 | 0.188168  |
| 60  | 6  | 0 | 6.149499  | -1.313344 | -0.142228 |
| 61  | 6  | 0 | 4.847364  | -1.152055 | 0.311651  |
| 62  | 8  | 0 | 2.381598  | -2.017885 | 1.477333  |
| 63  | 35 | 0 | 8.890824  | -0.584345 | -0.435707 |
| 64  | 8  | 0 | 1.092927  | 5.584685  | 2.829166  |
| 65  | 1  | 0 | -3.612380 | 2.863647  | -1.791853 |
| 66  | 1  | 0 | -0.602750 | 1.933658  | 2.946900  |
| 67  | 1  | 0 | -0.305082 | 3.829208  | -2.330413 |
| 68  | 1  | 0 | 3.077771  | 1.979868  | 2.588438  |
| 69  | 1  | 0 | -4.073587 | 4.424860  | -0.005400 |
| 70  | 1  | 0 | -4.725625 | 4.752377  | 2.356542  |
| 71  | 1  | 0 | -4.381523 | 2.935196  | 4.014297  |
| 72  | 1  | 0 | -3.427544 | 0.757810  | 3.274852  |
| 73  | 1  | 0 | -2.891642 | 0.401802  | 0.885102  |
| 74  | 1  | 0 | 2.979695  | 4.214331  | 1.651929  |
| 75  | 1  | 0 | 3.169393  | 5.681467  | -0.326674 |
| 76  | 1  | 0 | 3.096287  | 4.710506  | -2.614674 |
| 77  | 1  | 0 | 2.879776  | 2.251068  | -2.898104 |
| 78  | 1  | 0 | 2.659014  | 0.784894  | -0.915924 |
| 79  | 1  | 0 | 5.237922  | 1.771036  | 2.013060  |
| 80  | 1  | 0 | 7.548032  | 1.473983  | 1.210062  |
| 81  | 1  | 0 | 6.396255  | -2.168640 | -0.762675 |
| 82  | 1  | 0 | 4.099539  | -1.887282 | 0.051774  |
| 83  | 1  | 0 | -3.975118 | -1.830012 | -1.636222 |
| 84  | 1  | 0 | -6.239590 | -2.768891 | -1.377447 |
| 85  | 1  | 0 | -7.855010 | 1.189051  | -1.007403 |
| 86  | 1  | 0 | -5.608010 | 2.138894  | -1.254362 |
| 87  | 1  | 0 | -0.205938 | -1.052457 | -0.826579 |
| 88  | 1  | 0 | 1.277159  | -2.996462 | -0.554534 |
| 89  | 1  | 0 | 3.699426  | -1.619156 | -3.825657 |
| 90  | 1  | 0 | 2.149064  | 0.284702  | -4.166752 |
| 91  | 1  | 0 | -2.172927 | -1.827021 | 0.299423  |
| 92  | 1  | 0 | -2.897751 | -4.185407 | 0.407220  |
| 93  | 1  | 0 | 0.033873  | -4.947050 | 3.452047  |
| 94  | 1  | 0 | 0.724489  | -2.569861 | 3.390654  |
| 95  | 1  | 0 | -0.361533 | 2.537273  | 1.300951  |
| 96  | 1  | 0 | -0.049864 | 3.550379  | -0.603830 |
| 97  | 1  | 0 | -1.392847 | 4.330996  | 1.404293  |
| 98  | 1  | 0 | -1.700536 | 4.244949  | 3.127494  |
| 99  | 1  | 0 | -1.393526 | 5.832303  | 2.360819  |
| 100 | 1  | 0 | 0.539597  | 5.876138  | -1.627220 |
| 101 | 1  | 0 | 0.097149  | 7.301956  | -0.642400 |
| 102 | 1  | 0 | 0.491359  | 5.756276  | 0.134104  |
| 103 | 1  | 0 | -1.054335 | -0.071605 | 1.420719  |
| 104 | 1  | 0 | 0.625939  | 1.740427  | -2.917918 |

-----  
**3f-R**

| Center<br>Number | Atomic<br>Number | Atomic<br>Type | Coordinates (Angstroms) |           |           |
|------------------|------------------|----------------|-------------------------|-----------|-----------|
|                  |                  |                | X                       | Y         | Z         |
| 1                | 6                | 0              | -2.140224               | -1.418750 | 1.533960  |
| 2                | 6                | 0              | -2.210098               | -1.157485 | 0.163808  |
| 3                | 6                | 0              | -3.442070               | -1.229225 | -0.484028 |
| 4                | 6                | 0              | -4.596076               | -1.556529 | 0.227548  |
| 5                | 6                | 0              | -4.521867               | -1.812442 | 1.593764  |
| 6                | 6                | 0              | -3.289514               | -1.745099 | 2.246402  |
| 7                | 6                | 0              | -0.956711               | -0.740836 | -0.595774 |
| 8                | 7                | 0              | -0.475748               | 0.556555  | -0.106013 |
| 9                | 6                | 0              | 0.773396                | 0.465962  | 0.457952  |
| 10               | 6                | 0              | 1.226507                | -0.947666 | 0.224417  |
| 11               | 6                | 0              | 0.244838                | -1.633616 | -0.387838 |
| 12               | 6                | 0              | -1.306392               | 1.702111  | -0.059690 |
| 13               | 6                | 0              | -1.274367               | 2.579382  | 1.032655  |
| 14               | 6                | 0              | -2.108938               | 3.683555  | 1.058964  |
| 15               | 6                | 0              | -3.005660               | 3.927526  | 0.012396  |
| 16               | 6                | 0              | -3.050399               | 3.050773  | -1.071353 |
| 17               | 6                | 0              | -2.195652               | 1.949931  | -1.102158 |
| 18               | 8                | 0              | -3.786336               | 5.032506  | 0.142531  |
| 19               | 8                | 0              | 1.387693                | 1.347292  | 1.030467  |
| 20               | 7                | 0              | 2.441733                | -1.382842 | 0.711237  |

|    |   |   |           |           |           |
|----|---|---|-----------|-----------|-----------|
| 21 | 6 | 0 | 3.664360  | -0.714325 | 0.467119  |
| 22 | 6 | 0 | 4.783598  | -1.065150 | 1.231669  |
| 23 | 6 | 0 | 6.005940  | -0.453409 | 1.013031  |
| 24 | 6 | 0 | 6.133853  | 0.542775  | 0.038714  |
| 25 | 6 | 0 | 5.022959  | 0.899625  | -0.724598 |
| 26 | 6 | 0 | 3.801017  | 0.259605  | -0.517893 |
| 27 | 6 | 0 | 0.304236  | -3.036613 | -0.895453 |
| 28 | 8 | 0 | -0.752629 | -3.845945 | -0.358408 |
| 29 | 6 | 0 | -1.878043 | -3.923657 | -1.097239 |
| 30 | 6 | 0 | -2.940912 | -4.688790 | -0.364000 |
| 31 | 8 | 0 | 7.372398  | 1.095387  | -0.090909 |
| 32 | 8 | 0 | -1.994257 | -3.415221 | -2.187845 |
| 33 | 1 | 0 | 0.235544  | -3.051117 | -1.986501 |
| 34 | 1 | 0 | 1.232985  | -3.523197 | -0.593306 |
| 35 | 1 | 0 | -1.189780 | -0.690217 | -1.667682 |
| 36 | 1 | 0 | -3.496388 | -1.041470 | -1.553241 |
| 37 | 1 | 0 | -5.550139 | -1.609462 | -0.287486 |
| 38 | 1 | 0 | -5.418728 | -2.065674 | 2.150477  |
| 39 | 1 | 0 | -3.225607 | -1.945865 | 3.311265  |
| 40 | 1 | 0 | -1.179846 | -1.364437 | 2.041597  |
| 41 | 1 | 0 | -2.227537 | 1.283934  | -1.958682 |
| 42 | 1 | 0 | -3.733017 | 3.210711  | -1.897120 |
| 43 | 1 | 0 | -2.092044 | 4.372852  | 1.896698  |
| 44 | 1 | 0 | -0.588200 | 2.394375  | 1.849027  |
| 45 | 1 | 0 | 2.952160  | 0.526200  | -1.139506 |
| 46 | 1 | 0 | 5.091938  | 1.660629  | -1.492743 |
| 47 | 1 | 0 | 6.878617  | -0.722697 | 1.598828  |
| 48 | 1 | 0 | 4.684022  | -1.820241 | 2.006443  |
| 49 | 1 | 0 | -3.213147 | -4.123726 | 0.533706  |
| 50 | 1 | 0 | -3.813108 | -4.808953 | -1.004546 |
| 51 | 1 | 0 | -2.557524 | -5.662149 | -0.049688 |
| 52 | 1 | 0 | 2.526515  | -2.383970 | 0.836547  |
| 53 | 6 | 0 | -4.704737 | 5.304640  | -0.897669 |
| 54 | 1 | 0 | -5.227686 | 6.216026  | -0.609768 |
| 55 | 1 | 0 | -4.188096 | 5.465647  | -1.850837 |
| 56 | 1 | 0 | -5.428009 | 4.488947  | -1.011434 |
| 57 | 6 | 0 | 7.526907  | 2.112829  | -1.059341 |
| 58 | 1 | 0 | 8.567828  | 2.430212  | -1.003644 |
| 59 | 1 | 0 | 7.313706  | 1.738257  | -2.067460 |
| 60 | 1 | 0 | 6.872983  | 2.966508  | -0.846392 |

3f-S

| Center<br>Number | Atomic<br>Number | Atomic<br>Type | Coordinates (Angstroms) |           |           |
|------------------|------------------|----------------|-------------------------|-----------|-----------|
|                  |                  |                | X                       | Y         | Z         |
| 1                | 6                | 0              | -2.618228               | -2.153488 | -0.382467 |
| 2                | 6                | 0              | -2.535738               | -0.789001 | -0.667012 |
| 3                | 6                | 0              | -3.720864               | -0.075323 | -0.895333 |
| 4                | 6                | 0              | -4.948918               | -0.713779 | -0.846448 |
| 5                | 6                | 0              | -5.027728               | -2.082360 | -0.575089 |
| 6                | 6                | 0              | -3.853316               | -2.798066 | -0.343644 |
| 7                | 7                | 0              | -1.291197               | -0.117311 | -0.696691 |
| 8                | 6                | 0              | -1.188235               | 1.334468  | -0.630033 |
| 9                | 6                | 0              | 0.297809                | 1.574943  | -0.738913 |
| 10               | 6                | 0              | 0.950457                | 0.408966  | -0.878117 |
| 11               | 6                | 0              | -0.062437               | -0.702020 | -0.922857 |
| 12               | 6                | 0              | -1.759596               | 1.925475  | 0.647220  |
| 13               | 6                | 0              | -1.485585               | 1.327961  | 1.878888  |
| 14               | 6                | 0              | -1.960953               | 1.899810  | 3.053568  |
| 15               | 6                | 0              | -2.706003               | 3.078992  | 3.007090  |
| 16               | 6                | 0              | -2.976847               | 3.680082  | 1.781552  |
| 17               | 6                | 0              | -2.505655               | 3.101602  | 0.603399  |
| 18               | 6                | 0              | 0.811823                | 2.973776  | -0.651807 |
| 19               | 8                | 0              | 2.178088                | 2.975976  | -1.060956 |
| 20               | 6                | 0              | 2.950937                | 4.082896  | -0.935762 |
| 21               | 8                | 0              | 4.096658                | 4.010548  | -1.295385 |
| 22               | 7                | 0              | 2.283446                | 0.141827  | -1.110330 |
| 23               | 6                | 0              | 2.984022                | -0.889240 | -0.437400 |
| 24               | 6                | 0              | 2.516610                | -1.467017 | 0.748917  |
| 25               | 6                | 0              | 3.242930                | -2.464628 | 1.377607  |
| 26               | 6                | 0              | 4.468287                | -2.889499 | 0.853745  |
| 27               | 6                | 0              | 4.954174                | -2.301803 | -0.314243 |
| 28               | 6                | 0              | 4.204111                | -1.316416 | -0.954875 |



|    |   |   |           |           |           |
|----|---|---|-----------|-----------|-----------|
| 29 | 8 | 0 | 0.163273  | -1.878826 | -1.130934 |
| 30 | 8 | 0 | 5.109472  | -3.868423 | 1.552351  |
| 31 | 8 | 0 | -6.278006 | -2.617642 | -0.555669 |
| 32 | 6 | 0 | 2.318759  | 5.317951  | -0.347660 |
| 33 | 1 | 0 | -1.701093 | 1.785005  | -1.493135 |
| 34 | 1 | 0 | 0.223125  | 3.637502  | -1.299986 |
| 35 | 1 | 0 | -2.725587 | 3.563676  | -0.356902 |
| 36 | 1 | 0 | -3.560600 | 4.594132  | 1.738320  |
| 37 | 1 | 0 | -3.076947 | 3.523643  | 3.925081  |
| 38 | 1 | 0 | -1.751185 | 1.426447  | 4.007570  |
| 39 | 1 | 0 | -0.906062 | 0.408286  | 1.909128  |
| 40 | 1 | 0 | -1.715395 | -2.719637 | -0.200634 |
| 41 | 1 | 0 | -3.878147 | -3.858972 | -0.124871 |
| 42 | 1 | 0 | -5.867412 | -0.163106 | -1.019850 |
| 43 | 1 | 0 | -3.694427 | 0.987939  | -1.106241 |
| 44 | 1 | 0 | 1.583222  | -1.126545 | 1.186931  |
| 45 | 1 | 0 | 2.884239  | -2.922440 | 2.293733  |
| 46 | 1 | 0 | 5.901471  | -2.605252 | -0.743851 |
| 47 | 1 | 0 | 4.571241  | -0.874715 | -1.876787 |
| 48 | 1 | 0 | 0.717048  | 3.343643  | 0.377318  |
| 49 | 1 | 0 | 1.409444  | 5.595601  | -0.886944 |
| 50 | 1 | 0 | 2.050785  | 5.147960  | 0.699292  |
| 51 | 1 | 0 | 3.042596  | 6.128526  | -0.405819 |
| 52 | 1 | 0 | 2.833890  | 0.969448  | -1.309361 |
| 53 | 6 | 0 | 6.345139  | -4.322918 | 1.039748  |
| 54 | 1 | 0 | 6.691342  | -5.098226 | 1.722736  |
| 55 | 1 | 0 | 6.227121  | -4.747451 | 0.035887  |
| 56 | 1 | 0 | 7.083279  | -3.512994 | 1.003767  |
| 57 | 6 | 0 | -6.385969 | -4.000656 | -0.281119 |
| 58 | 1 | 0 | -7.449821 | -4.233836 | -0.311689 |
| 59 | 1 | 0 | -5.859616 | -4.597078 | -1.035174 |
| 60 | 1 | 0 | -5.988065 | -4.240469 | 0.711646  |

-----  
**AAf<sub>homo</sub>**  
 -----

| Center<br>Number | Atomic<br>Number | Atomic<br>Type | Coordinates (Angstroms) |           |           |
|------------------|------------------|----------------|-------------------------|-----------|-----------|
|                  |                  |                | X                       | Y         | Z         |
| 1                | 6                | 0              | -4.571656               | -1.496256 | 0.466825  |
| 2                | 6                | 0              | -3.833584               | -1.326733 | -0.702877 |
| 3                | 6                | 0              | -3.938978               | -2.287456 | -1.718373 |
| 4                | 6                | 0              | -4.716900               | -3.416768 | -1.522787 |
| 5                | 6                | 0              | -5.416127               | -3.608613 | -0.326863 |
| 6                | 6                | 0              | -5.364281               | -2.624625 | 0.658026  |
| 7                | 7                | 0              | -2.999885               | -0.190496 | -0.841422 |
| 8                | 6                | 0              | -1.898190               | -0.101895 | -1.654127 |
| 9                | 6                | 0              | -1.304112               | 1.259777  | -1.406005 |
| 10               | 6                | 0              | -2.102887               | 1.926485  | -0.549351 |
| 11               | 6                | 0              | -3.234492               | 1.037572  | -0.096812 |
| 12               | 6                | 0              | -1.995359               | 3.338395  | -0.077078 |
| 13               | 8                | 0              | -2.925444               | 4.154275  | -0.809736 |
| 14               | 6                | 0              | -3.796402               | 4.898434  | -0.096505 |
| 15               | 6                | 0              | -4.779753               | 5.570106  | -1.012542 |
| 16               | 7                | 0              | -0.227715               | 1.771766  | -2.102511 |
| 17               | 6                | 0              | 1.014976                | 1.182639  | -2.412446 |
| 18               | 6                | 0              | 1.309983                | -0.180625 | -2.255085 |
| 19               | 6                | 0              | 2.549976                | -0.674678 | -2.626838 |
| 20               | 6                | 0              | 3.538045                | 0.166912  | -3.150256 |
| 21               | 6                | 0              | 3.271832                | 1.530765  | -3.266073 |
| 22               | 6                | 0              | 2.017965                | 2.023760  | -2.900006 |
| 23               | 8                | 0              | -1.505691               | -0.945542 | -2.442256 |
| 24               | 6                | 0              | -4.615522               | 1.619568  | -0.349940 |
| 25               | 6                | 0              | -5.333238               | 2.194896  | 0.695908  |
| 26               | 6                | 0              | -6.588553               | 2.757873  | 0.463619  |
| 27               | 6                | 0              | -7.136741               | 2.730899  | -0.815167 |
| 28               | 6                | 0              | -6.419735               | 2.154358  | -1.865629 |
| 29               | 6                | 0              | -5.161930               | 1.607893  | -1.635378 |
| 30               | 8                | 0              | 4.708406                | -0.429271 | -3.505985 |
| 31               | 8                | 0              | -6.103607               | -4.776711 | -0.215925 |
| 32               | 8                | 0              | -3.776618               | 4.989456  | 1.107264  |
| 33               | 8                | 0              | 1.029557                | 4.808065  | 1.023580  |
| 34               | 6                | 0              | 1.488326                | 4.228295  | 1.981826  |
| 35               | 6                | 0              | 2.138982                | 4.874113  | 3.172735  |
| 36               | 8                | 0              | 1.482939                | 2.891079  | 2.106390  |

|     |   |   |           |           |           |
|-----|---|---|-----------|-----------|-----------|
| 37  | 6 | 0 | 0.997553  | 2.156160  | 0.968191  |
| 38  | 6 | 0 | 1.609461  | 0.807205  | 0.949917  |
| 39  | 6 | 0 | 1.055658  | -0.363561 | 1.312298  |
| 40  | 6 | 0 | 2.082637  | -1.451299 | 1.142341  |
| 41  | 7 | 0 | 3.214686  | -0.835334 | 0.653309  |
| 42  | 6 | 0 | 3.025339  | 0.599928  | 0.485625  |
| 43  | 7 | 0 | -0.169997 | -0.586731 | 1.889325  |
| 44  | 6 | 0 | -0.974201 | -1.738855 | 1.755746  |
| 45  | 6 | 0 | -0.923956 | -2.557217 | 0.630358  |
| 46  | 6 | 0 | -1.714198 | -3.702326 | 0.545569  |
| 47  | 6 | 0 | -2.595490 | -4.018430 | 1.578915  |
| 48  | 6 | 0 | -2.672718 | -3.181352 | 2.695937  |
| 49  | 6 | 0 | -1.867008 | -2.058342 | 2.786030  |
| 50  | 8 | 0 | -3.425837 | -5.100929 | 1.584687  |
| 51  | 6 | 0 | 4.014353  | 1.457285  | 1.253407  |
| 52  | 6 | 0 | 4.448332  | 2.656172  | 0.688517  |
| 53  | 6 | 0 | 5.286567  | 3.509054  | 1.404764  |
| 54  | 6 | 0 | 5.702146  | 3.157951  | 2.687517  |
| 55  | 6 | 0 | 5.272957  | 1.955679  | 3.251257  |
| 56  | 6 | 0 | 4.428351  | 1.110220  | 2.538732  |
| 57  | 6 | 0 | 4.429164  | -1.474785 | 0.308127  |
| 58  | 6 | 0 | 5.361535  | -0.793432 | -0.488795 |
| 59  | 6 | 0 | 6.564288  | -1.385321 | -0.832428 |
| 60  | 6 | 0 | 6.870778  | -2.676861 | -0.395843 |
| 61  | 6 | 0 | 5.950965  | -3.360620 | 0.397762  |
| 62  | 6 | 0 | 4.742457  | -2.761605 | 0.751988  |
| 63  | 8 | 0 | 1.945109  | -2.631046 | 1.410506  |
| 64  | 8 | 0 | 8.074997  | -3.173022 | -0.790418 |
| 65  | 1 | 0 | -3.121449 | 0.852205  | 0.982932  |
| 66  | 1 | 0 | 1.255178  | 2.710344  | 0.058597  |
| 67  | 1 | 0 | -0.091565 | 2.083121  | 1.036768  |
| 68  | 1 | 0 | -0.995332 | 3.753589  | -0.235515 |
| 69  | 1 | 0 | -2.227693 | 3.416306  | 0.989357  |
| 70  | 1 | 0 | 3.087412  | 0.862262  | -0.579743 |
| 71  | 1 | 0 | -4.909394 | 2.209738  | 1.697483  |
| 72  | 1 | 0 | -7.137726 | 3.206595  | 1.285289  |
| 73  | 1 | 0 | -8.118687 | 3.156858  | -0.996081 |
| 74  | 1 | 0 | -6.843227 | 2.129954  | -2.864885 |
| 75  | 1 | 0 | -4.604055 | 1.154652  | -2.451069 |
| 76  | 1 | 0 | 4.128876  | 2.918059  | -0.319372 |
| 77  | 1 | 0 | 5.620575  | 4.440484  | 0.957974  |
| 78  | 1 | 0 | 6.362198  | 3.815258  | 3.245046  |
| 79  | 1 | 0 | 5.598297  | 1.677323  | 4.248875  |
| 80  | 1 | 0 | 4.089530  | 0.174365  | 2.976349  |
| 81  | 1 | 0 | 5.149373  | 0.207635  | -0.848315 |
| 82  | 1 | 0 | 7.285258  | -0.857367 | -1.448363 |
| 83  | 1 | 0 | 6.157128  | -4.361817 | 0.757171  |
| 84  | 1 | 0 | 4.040107  | -3.303377 | 1.368701  |
| 85  | 1 | 0 | -3.390820 | -2.160392 | -2.641158 |
| 86  | 1 | 0 | -4.791047 | -4.177183 | -2.294193 |
| 87  | 1 | 0 | -5.898881 | -2.737602 | 1.593612  |
| 88  | 1 | 0 | -4.519571 | -0.761245 | 1.262452  |
| 89  | 1 | 0 | 0.564661  | -0.858231 | -1.864910 |
| 90  | 1 | 0 | 2.780832  | -1.728467 | -2.504750 |
| 91  | 1 | 0 | 4.015425  | 2.220737  | -3.647842 |
| 92  | 1 | 0 | 1.819527  | 3.087290  | -3.010375 |
| 93  | 1 | 0 | -1.910018 | -1.428346 | 3.670627  |
| 94  | 1 | 0 | -3.369722 | -3.434285 | 3.488725  |
| 95  | 1 | 0 | -1.651341 | -4.317220 | -0.344310 |
| 96  | 1 | 0 | -0.254604 | -2.311205 | -0.188284 |
| 97  | 1 | 0 | 3.164595  | 4.504185  | 3.261390  |
| 98  | 1 | 0 | 2.133263  | 5.955996  | 3.051517  |
| 99  | 1 | 0 | 1.602039  | 4.594217  | 4.082473  |
| 100 | 1 | 0 | -5.333838 | 4.800101  | -1.557029 |
| 101 | 1 | 0 | -5.463955 | 6.182515  | -0.427472 |
| 102 | 1 | 0 | -4.248310 | 6.185411  | -1.742581 |
| 103 | 1 | 0 | -0.595667 | 0.204361  | 2.353409  |
| 104 | 1 | 0 | -0.201616 | 2.784473  | -2.117491 |
| 105 | 6 | 0 | 8.406109  | -4.480044 | -0.365295 |
| 106 | 1 | 0 | 9.390287  | -4.694444 | -0.780897 |
| 107 | 1 | 0 | 8.450272  | -4.542909 | 0.728190  |
| 108 | 1 | 0 | 7.683641  | -5.214270 | -0.740008 |
| 109 | 6 | 0 | 5.780620  | 0.416186  | -3.863998 |
| 110 | 1 | 0 | 6.634116  | -0.235838 | -4.048710 |

|     |   |   |           |           |           |
|-----|---|---|-----------|-----------|-----------|
| 111 | 1 | 0 | 5.555841  | 0.987010  | -4.772533 |
| 112 | 1 | 0 | 6.022270  | 1.114775  | -3.051572 |
| 113 | 6 | 0 | -3.277763 | -6.036166 | 0.533479  |
| 114 | 1 | 0 | -3.996297 | -6.831641 | 0.732555  |
| 115 | 1 | 0 | -3.502501 | -5.582068 | -0.437573 |
| 116 | 1 | 0 | -2.262017 | -6.448713 | 0.519089  |
| 117 | 6 | 0 | -6.687891 | -5.062428 | 1.041673  |
| 118 | 1 | 0 | -7.121913 | -6.058432 | 0.953691  |
| 119 | 1 | 0 | -5.926105 | -5.055739 | 1.828984  |
| 120 | 1 | 0 | -7.479598 | -4.344013 | 1.284447  |

-----  
**AAf<sub>hetero</sub>**  
 -----

| Center<br>Number | Atomic<br>Number | Atomic<br>Type | Coordinates (Angstroms) |           |           |
|------------------|------------------|----------------|-------------------------|-----------|-----------|
|                  |                  |                | X                       | Y         | Z         |
| 1                | 6                | 0              | 4.167638                | -1.800228 | 1.163622  |
| 2                | 6                | 0              | 3.447530                | -0.842034 | 0.452473  |
| 3                | 6                | 0              | 3.878830                | -0.472077 | -0.825191 |
| 4                | 6                | 0              | 5.010427                | -1.049941 | -1.376265 |
| 5                | 6                | 0              | 5.723874                | -2.019885 | -0.666918 |
| 6                | 6                | 0              | 5.295397                | -2.397875 | 0.605105  |
| 7                | 7                | 0              | 2.304515                | -0.221521 | 1.013222  |
| 8                | 6                | 0              | 1.450986                | -0.812195 | 1.914131  |
| 9                | 6                | 0              | 0.500133                | 0.265488  | 2.348583  |
| 10               | 6                | 0              | 0.841545                | 1.425765  | 1.763569  |
| 11               | 6                | 0              | 2.013064                | 1.203802  | 0.829814  |
| 12               | 6                | 0              | 0.127199                | 2.727919  | 1.905355  |
| 13               | 8                | 0              | 1.024884                | 3.803906  | 2.218001  |
| 14               | 6                | 0              | 1.432281                | 4.571021  | 1.196830  |
| 15               | 8                | 0              | 1.049298                | 4.422628  | 0.056312  |
| 16               | 7                | 0              | -0.470181               | -0.021198 | 3.291076  |
| 17               | 6                | 0              | -1.378059               | -1.092474 | 3.070042  |
| 18               | 6                | 0              | -2.065550               | -1.647209 | 4.151563  |
| 19               | 6                | 0              | -2.956184               | -2.689465 | 3.952066  |
| 20               | 6                | 0              | -3.160072               | -3.216492 | 2.671616  |
| 21               | 6                | 0              | -2.479811               | -2.666888 | 1.583365  |
| 22               | 6                | 0              | -1.607647               | -1.600527 | 1.794271  |
| 23               | 8                | 0              | 1.466155                | -1.966545 | 2.300007  |
| 24               | 6                | 0              | 3.242878                | 2.056972  | 1.089710  |
| 25               | 6                | 0              | 3.781166                | 2.847925  | 0.076921  |
| 26               | 6                | 0              | 4.936984                | 3.595871  | 0.301188  |
| 27               | 6                | 0              | 5.562068                | 3.551215  | 1.543532  |
| 28               | 6                | 0              | 5.023503                | 2.763184  | 2.563861  |
| 29               | 6                | 0              | 3.869247                | 2.019745  | 2.337573  |
| 30               | 8                | 0              | -4.034513               | -4.255016 | 2.590787  |
| 31               | 8                | 0              | 6.813982                | -2.543258 | -1.299682 |
| 32               | 6                | 0              | 2.413574                | 5.606799  | 1.662095  |
| 33               | 6                | 0              | -0.199645               | 2.258406  | -2.129128 |
| 34               | 8                | 0              | -0.846939               | 3.025884  | -3.156176 |
| 35               | 6                | 0              | -0.244471               | 4.121013  | -3.682752 |
| 36               | 8                | 0              | -0.870114               | 4.786681  | -4.466500 |
| 37               | 6                | 0              | -1.050418               | 1.066323  | -1.861793 |
| 38               | 6                | 0              | -0.738283               | -0.231276 | -2.032129 |
| 39               | 6                | 0              | -1.940731               | -1.067665 | -1.701068 |
| 40               | 7                | 0              | -2.947590               | -0.186741 | -1.358319 |
| 41               | 6                | 0              | -2.503125               | 1.200755  | -1.471450 |
| 42               | 6                | 0              | -4.323716               | -0.512109 | -1.233277 |
| 43               | 6                | 0              | -5.274419               | 0.509268  | -1.165666 |
| 44               | 6                | 0              | -6.634047               | 0.227290  | -1.044741 |
| 45               | 6                | 0              | -7.070253               | -1.094811 | -0.993517 |
| 46               | 6                | 0              | -6.124943               | -2.121217 | -1.071115 |
| 47               | 6                | 0              | -4.772671               | -1.843120 | -1.186193 |
| 48               | 8                | 0              | -8.368574               | -1.478959 | -0.876976 |
| 49               | 8                | 0              | -2.007119               | -2.282818 | -1.762133 |
| 50               | 7                | 0              | 0.375612                | -0.775840 | -2.626440 |
| 51               | 6                | 0              | 1.110891                | -1.899584 | -2.191263 |
| 52               | 6                | 0              | 0.938506                | -2.475894 | -0.929761 |
| 53               | 6                | 0              | 1.765684                | -3.504775 | -0.514532 |
| 54               | 6                | 0              | 2.789036                | -3.974277 | -1.343737 |
| 55               | 6                | 0              | 2.939796                | -3.432165 | -2.619723 |
| 56               | 6                | 0              | 2.095928                | -2.405233 | -3.035972 |
| 57               | 6                | 0              | -2.720523               | 2.034231  | -0.218468 |
| 58               | 6                | 0              | -2.703322               | 3.427262  | -0.328792 |

|     |   |   |            |           |           |
|-----|---|---|------------|-----------|-----------|
| 59  | 6 | 0 | -2.920885  | 4.225091  | 0.793506  |
| 60  | 6 | 0 | -3.178456  | 3.636235  | 2.029893  |
| 61  | 6 | 0 | -3.200926  | 2.246714  | 2.140746  |
| 62  | 6 | 0 | -2.964488  | 1.447552  | 1.024212  |
| 63  | 8 | 0 | 3.586674   | -4.948562 | -0.821731 |
| 64  | 6 | 0 | 1.174459   | 4.413886  | -3.265495 |
| 65  | 1 | 0 | -3.041676  | 1.679925  | -2.302669 |
| 66  | 1 | 0 | -0.431437  | 2.979856  | 1.000352  |
| 67  | 1 | 0 | -0.577520  | 2.690517  | 2.734812  |
| 68  | 1 | 0 | -0.084048  | 2.882527  | -1.234039 |
| 69  | 1 | 0 | 1.672205   | 1.386363  | -0.201662 |
| 70  | 1 | 0 | -2.530733  | 3.886496  | -1.300111 |
| 71  | 1 | 0 | -2.905488  | 5.305820  | 0.695571  |
| 72  | 1 | 0 | -3.367048  | 4.257037  | 2.900239  |
| 73  | 1 | 0 | -3.416584  | 1.776459  | 3.096573  |
| 74  | 1 | 0 | -3.011774  | 0.366807  | 1.111078  |
| 75  | 1 | 0 | 3.286442   | 2.884129  | -0.890799 |
| 76  | 1 | 0 | 5.344759   | 4.209305  | -0.494119 |
| 77  | 1 | 0 | 6.463749   | 4.129115  | 1.721528  |
| 78  | 1 | 0 | 5.506990   | 2.726525  | 3.535537  |
| 79  | 1 | 0 | 3.447847   | 1.400405  | 3.129000  |
| 80  | 1 | 0 | 3.318962   | 0.264509  | -1.395601 |
| 81  | 1 | 0 | 5.353009   | -0.773477 | -2.368061 |
| 82  | 1 | 0 | 5.827660   | -3.149244 | 1.176350  |
| 83  | 1 | 0 | 3.835894   | -2.096890 | 2.150238  |
| 84  | 1 | 0 | -4.064123  | -2.654151 | -1.266631 |
| 85  | 1 | 0 | -6.473680  | -3.148986 | -1.043742 |
| 86  | 1 | 0 | -7.332596  | 1.053695  | -0.994135 |
| 87  | 1 | 0 | -4.975585  | 1.549941  | -1.201451 |
| 88  | 1 | 0 | 0.174993   | -2.108177 | -0.254496 |
| 89  | 1 | 0 | 1.665668   | -3.913836 | 0.484848  |
| 90  | 1 | 0 | 3.715071   | -3.781185 | -3.291536 |
| 91  | 1 | 0 | 2.223709   | -1.975106 | -4.026114 |
| 92  | 1 | 0 | -1.120140  | -1.129651 | 0.943686  |
| 93  | 1 | 0 | -2.616119  | -3.035577 | 0.572879  |
| 94  | 1 | 0 | -3.499399  | -3.126899 | 4.783702  |
| 95  | 1 | 0 | -1.887968  | -1.260901 | 5.150693  |
| 96  | 1 | 0 | 0.798880   | 1.942353  | -2.454770 |
| 97  | 1 | 0 | 1.251437   | 4.537667  | -2.180916 |
| 98  | 1 | 0 | 1.836006   | 3.593917  | -3.562911 |
| 99  | 1 | 0 | 1.490072   | 5.327076  | -3.767415 |
| 100 | 1 | 0 | 1.941967   | 6.253976  | 2.407692  |
| 101 | 1 | 0 | 3.259302   | 5.099222  | 2.136486  |
| 102 | 1 | 0 | 2.756547   | 6.196347  | 0.812064  |
| 103 | 1 | 0 | -0.883189  | 0.786996  | 3.742985  |
| 104 | 1 | 0 | 0.893862   | -0.146163 | -3.225039 |
| 105 | 6 | 0 | -4.299130  | -4.773437 | 1.300968  |
| 106 | 1 | 0 | -5.014915  | -5.583281 | 1.438308  |
| 107 | 1 | 0 | -4.736488  | -4.003968 | 0.654396  |
| 108 | 1 | 0 | -3.388772  | -5.166336 | 0.834338  |
| 109 | 6 | 0 | -9.341691  | -0.455203 | -0.808076 |
| 110 | 1 | 0 | -10.304337 | -0.957392 | -0.720976 |
| 111 | 1 | 0 | -9.182770  | 0.184451  | 0.067754  |
| 112 | 1 | 0 | -9.332344  | 0.162163  | -1.713444 |
| 113 | 6 | 0 | 7.653260   | -3.392690 | -0.540909 |
| 114 | 1 | 0 | 8.494946   | -3.642932 | -1.186436 |
| 115 | 1 | 0 | 8.017055   | -2.883900 | 0.358908  |
| 116 | 1 | 0 | 7.133962   | -4.312712 | -0.248986 |
| 117 | 6 | 0 | 4.694315   | -5.349338 | -1.600972 |
| 118 | 1 | 0 | 5.248157   | -6.068955 | -0.997013 |
| 119 | 1 | 0 | 4.374575   | -5.832675 | -2.532340 |
| 120 | 1 | 0 | 5.338259   | -4.493517 | -1.842897 |

-----  
**AAf<sub>homo-inin</sub>**  
 -----

| Center<br>Number | Atomic<br>Number | Atomic<br>Type | Coordinates (Angstroms) |           |           |
|------------------|------------------|----------------|-------------------------|-----------|-----------|
|                  |                  |                | X                       | Y         | Z         |
| 1                | 6                | 0              | -5.207345               | 0.748647  | 0.183143  |
| 2                | 6                | 0              | -4.702059               | -0.305245 | 0.942179  |
| 3                | 6                | 0              | -5.518201               | -1.408202 | 1.212086  |
| 4                | 6                | 0              | -6.819643               | -1.445927 | 0.738493  |
| 5                | 6                | 0              | -7.333258               | -0.378680 | -0.005813 |
| 6                | 6                | 0              | -6.519769               | 0.721907  | -0.281707 |

|    |   |   |           |           |           |
|----|---|---|-----------|-----------|-----------|
| 7  | 7 | 0 | -3.355986 | -0.290339 | 1.381553  |
| 8  | 6 | 0 | -2.534732 | -1.489370 | 1.458122  |
| 9  | 6 | 0 | -1.199773 | -0.929296 | 1.895739  |
| 10 | 6 | 0 | -1.277525 | 0.398625  | 2.087412  |
| 11 | 6 | 0 | -2.691248 | 0.830812  | 1.810190  |
| 12 | 6 | 0 | -2.479168 | -2.261813 | 0.148937  |
| 13 | 6 | 0 | -2.331762 | -3.652101 | 0.159167  |
| 14 | 6 | 0 | -2.261657 | -4.360747 | -1.039268 |
| 15 | 6 | 0 | -2.348022 | -3.688639 | -2.257426 |
| 16 | 6 | 0 | -2.522139 | -2.305052 | -2.267124 |
| 17 | 6 | 0 | -2.584647 | -1.592730 | -1.070475 |
| 18 | 6 | 0 | -0.014320 | -1.825498 | 2.020300  |
| 19 | 8 | 0 | -0.502790 | -3.098734 | 2.451375  |
| 20 | 6 | 0 | 0.232501  | -4.221209 | 2.284021  |
| 21 | 8 | 0 | -0.332981 | -5.283723 | 2.370339  |
| 22 | 7 | 0 | -0.301187 | 1.261631  | 2.571159  |
| 23 | 6 | 0 | -0.123149 | 2.597789  | 2.079798  |
| 24 | 6 | 0 | -0.955419 | 3.629045  | 2.504635  |
| 25 | 6 | 0 | -0.806865 | 4.920714  | 2.001635  |
| 26 | 6 | 0 | 0.215832  | 5.198852  | 1.091157  |
| 27 | 6 | 0 | 1.092343  | 4.179200  | 0.705388  |
| 28 | 6 | 0 | 0.920490  | 2.894736  | 1.195160  |
| 29 | 8 | 0 | -3.178637 | 1.938631  | 1.955038  |
| 30 | 8 | 0 | 0.445418  | 6.418445  | 0.541869  |
| 31 | 6 | 0 | -0.437158 | 7.467241  | 0.891162  |
| 32 | 8 | 0 | -8.621912 | -0.506532 | -0.418500 |
| 33 | 6 | 0 | -9.165965 | 0.550965  | -1.184249 |
| 34 | 6 | 0 | 1.707365  | -4.065134 | 2.036439  |
| 35 | 6 | 0 | 0.929204  | -5.698883 | -1.065867 |
| 36 | 6 | 0 | 2.323017  | -5.128929 | -1.053927 |
| 37 | 8 | 0 | 3.312968  | -5.758987 | -0.784974 |
| 38 | 8 | 0 | 2.474220  | -3.814851 | -1.347673 |
| 39 | 6 | 0 | 1.362529  | -2.964069 | -1.618027 |
| 40 | 6 | 0 | 1.895540  | -1.561829 | -1.629464 |
| 41 | 6 | 0 | 3.308420  | -1.226281 | -1.198416 |
| 42 | 7 | 0 | 3.383143  | 0.210859  | -1.456105 |
| 43 | 6 | 0 | 2.227147  | 0.700602  | -2.020009 |
| 44 | 6 | 0 | 1.286803  | -0.464263 | -2.108630 |
| 45 | 6 | 0 | 4.543873  | 0.971710  | -1.177901 |
| 46 | 6 | 0 | 5.790561  | 0.351594  | -1.126025 |
| 47 | 6 | 0 | 6.939905  | 1.074695  | -0.809919 |
| 48 | 6 | 0 | 6.849208  | 2.441185  | -0.548878 |
| 49 | 6 | 0 | 5.599289  | 3.067418  | -0.604287 |
| 50 | 6 | 0 | 4.457957  | 2.345386  | -0.907008 |
| 51 | 8 | 0 | 7.903500  | 3.238604  | -0.233139 |
| 52 | 6 | 0 | 9.179465  | 2.631989  | -0.171572 |
| 53 | 6 | 0 | 3.652735  | -1.543963 | 0.249963  |
| 54 | 6 | 0 | 4.510989  | -2.598141 | 0.563221  |
| 55 | 6 | 0 | 4.889189  | -2.827346 | 1.884688  |
| 56 | 6 | 0 | 4.417874  | -1.999380 | 2.901575  |
| 57 | 6 | 0 | 3.547724  | -0.953225 | 2.595272  |
| 58 | 6 | 0 | 3.165188  | -0.732351 | 1.274836  |
| 59 | 7 | 0 | 0.081353  | -0.343070 | -2.767951 |
| 60 | 6 | 0 | -0.844793 | 0.687180  | -2.453946 |
| 61 | 6 | 0 | -0.784804 | 1.392129  | -1.256571 |
| 62 | 6 | 0 | -1.738801 | 2.356227  | -0.941458 |
| 63 | 6 | 0 | -2.803021 | 2.583941  | -1.815197 |
| 64 | 6 | 0 | -2.877699 | 1.868335  | -3.015361 |
| 65 | 6 | 0 | -1.893484 | 0.946730  | -3.341616 |
| 66 | 8 | 0 | 2.015078  | 1.839812  | -2.390782 |
| 67 | 8 | 0 | -3.809400 | 3.469059  | -1.573177 |
| 68 | 6 | 0 | -3.672370 | 4.293422  | -0.424606 |
| 69 | 1 | 0 | 4.012498  | -1.763302 | -1.848201 |
| 70 | 1 | 0 | 0.726833  | -1.446939 | 2.734062  |
| 71 | 1 | 0 | 0.920593  | -3.224872 | -2.589319 |
| 72 | 1 | 0 | -2.915871 | -2.158616 | 2.241730  |
| 73 | 1 | 0 | 4.873998  | -3.247036 | -0.229387 |
| 74 | 1 | 0 | 5.560642  | -3.647859 | 2.116837  |
| 75 | 1 | 0 | 4.726512  | -2.166716 | 3.928678  |
| 76 | 1 | 0 | 3.186254  | -0.299373 | 3.384266  |
| 77 | 1 | 0 | 2.503694  | 0.094595  | 1.021850  |
| 78 | 1 | 0 | -2.275519 | -4.183669 | 1.105031  |
| 79 | 1 | 0 | -2.158950 | -5.441747 | -1.017283 |
| 80 | 1 | 0 | -2.309452 | -4.241312 | -3.191350 |

|     |   |   |            |           |           |
|-----|---|---|------------|-----------|-----------|
| 81  | 1 | 0 | -2.639047  | -1.775914 | -3.210155 |
| 82  | 1 | 0 | -2.743199  | -0.517636 | -1.082648 |
| 83  | 1 | 0 | -5.135247  | -2.243346 | 1.790311  |
| 84  | 1 | 0 | -7.461510  | -2.297458 | 0.937724  |
| 85  | 1 | 0 | -6.881907  | 1.557632  | -0.868584 |
| 86  | 1 | 0 | -4.574133  | 1.595419  | -0.054550 |
| 87  | 1 | 0 | 3.498597   | 2.842912  | -0.955965 |
| 88  | 1 | 0 | 5.542408   | 4.130920  | -0.396905 |
| 89  | 1 | 0 | 7.890840   | 0.557092  | -0.774661 |
| 90  | 1 | 0 | 5.884856   | -0.710138 | -1.327450 |
| 91  | 1 | 0 | 0.003259   | 1.175202  | -0.542416 |
| 92  | 1 | 0 | -1.656170  | 2.897617  | -0.005644 |
| 93  | 1 | 0 | -3.705645  | 2.064240  | -3.688643 |
| 94  | 1 | 0 | -1.936152  | 0.415240  | -4.288326 |
| 95  | 1 | 0 | 1.600507   | 2.110508  | 0.868351  |
| 96  | 1 | 0 | 1.888290   | 4.415201  | 0.007154  |
| 97  | 1 | 0 | -1.483944  | 5.697163  | 2.337701  |
| 98  | 1 | 0 | -1.746421  | 3.410033  | 3.209726  |
| 99  | 1 | 0 | 0.482395   | -1.921670 | 1.044190  |
| 100 | 1 | 0 | 0.573216   | -3.093996 | -0.859998 |
| 101 | 1 | 0 | 1.920382   | -3.480250 | 1.135668  |
| 102 | 1 | 0 | 2.172324   | -3.528161 | 2.869047  |
| 103 | 1 | 0 | 2.156027   | -5.053480 | 1.938619  |
| 104 | 1 | 0 | 0.373042   | -5.397183 | -1.957060 |
| 105 | 1 | 0 | 1.005923   | -6.784055 | -1.020830 |
| 106 | 1 | 0 | 0.368505   | -5.352811 | -0.189802 |
| 107 | 1 | 0 | 0.584096   | 0.791093  | 2.723441  |
| 108 | 1 | 0 | -10.191951 | 0.263575  | -1.411652 |
| 109 | 1 | 0 | -9.166174  | 1.490179  | -0.619390 |
| 110 | 1 | 0 | -8.610040  | 0.690883  | -2.118362 |
| 111 | 1 | 0 | -4.537577  | 4.956318  | -0.427552 |
| 112 | 1 | 0 | -3.659355  | 3.696899  | 0.494609  |
| 113 | 1 | 0 | -2.751095  | 4.886592  | -0.480896 |
| 114 | 1 | 0 | -0.101117  | 8.342630  | 0.336803  |
| 115 | 1 | 0 | -1.468294  | 7.227835  | 0.605914  |
| 116 | 1 | 0 | -0.398290  | 7.677894  | 1.965853  |
| 117 | 1 | 0 | 9.879522   | 3.424042  | 0.091902  |
| 118 | 1 | 0 | 9.209279   | 1.848336  | 0.594235  |
| 119 | 1 | 0 | 9.461265   | 2.202558  | -1.139803 |
| 120 | 1 | 0 | -0.371759  | -1.229089 | -2.970295 |

4a-R

| Center<br>Number | Atomic<br>Number | Atomic<br>Type | Coordinates (Angstroms) |           |           |
|------------------|------------------|----------------|-------------------------|-----------|-----------|
|                  |                  |                | X                       | Y         | Z         |
| 1                | 35               | 0              | 5.336052                | -3.566961 | -0.024813 |
| 2                | 35               | 0              | -6.943913               | -1.707841 | 0.533151  |
| 3                | 6                | 0              | 3.025532                | 3.062963  | 2.357271  |
| 4                | 8                | 0              | -0.913931               | -0.664719 | -0.317687 |
| 5                | 7                | 0              | 0.976361                | 0.656853  | -0.552482 |
| 6                | 7                | 0              | -2.313934               | 1.999508  | -0.783199 |
| 7                | 6                | 0              | 1.974894                | -0.339270 | -0.433246 |
| 8                | 6                | 0              | -3.325359               | 1.069325  | -0.476352 |
| 9                | 6                | 0              | 2.296115                | 2.670782  | 0.089202  |
| 10               | 6                | 0              | 4.233348                | -1.087226 | -0.889607 |
| 11               | 6                | 0              | 1.329723                | 2.044268  | -0.895302 |
| 12               | 6                | 0              | -3.400413               | 0.434489  | 0.768283  |
| 13               | 6                | 0              | -0.377069               | 0.411220  | -0.486787 |
| 14               | 6                | 0              | 1.736311                | -1.521243 | 0.280037  |
| 15               | 6                | 0              | -4.477459               | -0.387073 | 1.071551  |
| 16               | 6                | 0              | -4.358517               | 0.895192  | -1.401369 |
| 17               | 6                | 0              | -1.071257               | 1.743940  | -0.720231 |
| 18               | 6                | 0              | 3.293637                | 3.527367  | -0.372910 |
| 19               | 6                | 0              | 2.164915                | 2.440515  | 1.459701  |
| 20               | 6                | 0              | 3.976424                | -2.258301 | -0.189607 |
| 21               | 6                | 0              | 2.736263                | -2.478947 | 0.396756  |
| 22               | 6                | 0              | -5.476560               | -0.578786 | 0.122218  |
| 23               | 6                | 0              | -5.426141               | 0.052127  | -1.114939 |
| 24               | 6                | 0              | 3.233268                | -0.129652 | -1.009011 |
| 25               | 6                | 0              | 4.019187                | 3.925036  | 1.892875  |
| 26               | 6                | 0              | 4.151507                | 4.157877  | 0.527155  |
| 27               | 1                | 0              | 2.922149                | 2.875241  | 3.421301  |
| 28               | 1                | 0              | 5.205247                | -0.918426 | -1.338992 |

|    |   |   |           |           |           |
|----|---|---|-----------|-----------|-----------|
| 29 | 1 | 0 | 1.772560  | 2.063981  | -1.899595 |
| 30 | 1 | 0 | -2.612814 | 0.591103  | 1.498013  |
| 31 | 1 | 0 | 0.772786  | -1.695782 | 0.736653  |
| 32 | 1 | 0 | -4.539262 | -0.879411 | 2.035622  |
| 33 | 1 | 0 | -4.310932 | 1.417613  | -2.351129 |
| 34 | 1 | 0 | 3.403495  | 3.699701  | -1.441413 |
| 35 | 1 | 0 | 1.391898  | 1.766545  | 1.820850  |
| 36 | 1 | 0 | 2.548727  | -3.392833 | 0.949083  |
| 37 | 1 | 0 | -6.218157 | -0.100461 | -1.839394 |
| 38 | 1 | 0 | 3.452938  | 0.782104  | -1.551391 |
| 39 | 1 | 0 | 4.690482  | 4.409004  | 2.595064  |
| 40 | 1 | 0 | 4.926397  | 4.822505  | 0.158592  |
| 41 | 6 | 0 | -0.016272 | 2.746168  | -0.934915 |
| 42 | 6 | 0 | -0.215610 | 4.050833  | -1.100993 |
| 43 | 1 | 0 | -1.226248 | 4.446704  | -1.110624 |
| 44 | 1 | 0 | 0.611490  | 4.744072  | -1.221905 |

-----  
**4a-S**  
 -----

| Center<br>Number | Atomic<br>Number | Atomic<br>Type | Coordinates (Angstroms) |           |           |
|------------------|------------------|----------------|-------------------------|-----------|-----------|
|                  |                  |                | X                       | Y         | Z         |
| 1                | 35               | 0              | -5.249630               | -3.640101 | 0.066409  |
| 2                | 35               | 0              | 7.000550                | -1.688104 | 0.324697  |
| 3                | 6                | 0              | -3.336717               | 3.133398  | 2.113201  |
| 4                | 8                | 0              | 0.931095                | -0.579099 | 0.081672  |
| 5                | 7                | 0              | -0.957638               | 0.650863  | -0.461417 |
| 6                | 7                | 0              | 2.304493                | 2.077681  | -0.499675 |
| 7                | 6                | 0              | -1.941495               | -0.358479 | -0.332255 |
| 8                | 6                | 0              | 3.332387                | 1.138957  | -0.289085 |
| 9                | 6                | 0              | -2.388551               | 2.649089  | -0.053774 |
| 10               | 6                | 0              | -4.129680               | -1.214106 | -0.920728 |
| 11               | 6                | 0              | -1.317325               | 2.006499  | -0.910660 |
| 12               | 6                | 0              | 3.521396                | 0.037127  | -1.130500 |
| 13               | 6                | 0              | 0.391432                | 0.448487  | -0.275656 |
| 14               | 6                | 0              | -1.742652               | -1.461903 | 0.506967  |
| 15               | 6                | 0              | 4.613761                | -0.800566 | -0.951815 |
| 16               | 6                | 0              | 4.268654                | 1.408907  | 0.713026  |
| 17               | 6                | 0              | 1.071674                | 1.778380  | -0.560992 |
| 18               | 6                | 0              | -3.363772               | 3.445217  | -0.651551 |
| 19               | 6                | 0              | -2.378131               | 2.495433  | 1.333803  |
| 20               | 6                | 0              | -3.911261               | -2.309160 | -0.094861 |
| 21               | 6                | 0              | -2.726802               | -2.436919 | 0.619718  |
| 22               | 6                | 0              | 5.513054                | -0.537781 | 0.076936  |
| 23               | 6                | 0              | 5.349576                | 0.558435  | 0.915326  |
| 24               | 6                | 0              | -3.145080               | -0.240722 | -1.037035 |
| 25               | 6                | 0              | -4.308099               | 3.935213  | 1.513279  |
| 26               | 6                | 0              | -4.319798               | 4.091892  | 0.130480  |
| 27               | 1                | 0              | -3.327214               | 3.004885  | 3.190920  |
| 28               | 1                | 0              | -5.059156               | -1.117586 | -1.470243 |
| 29               | 1                | 0              | -1.665698               | 1.963037  | -1.950861 |
| 30               | 1                | 0              | 2.810483                | -0.157815 | -1.926640 |
| 31               | 1                | 0              | -0.822874               | -1.560993 | 1.065023  |
| 32               | 1                | 0              | 4.763649                | -1.654815 | -1.602447 |
| 33               | 1                | 0              | 4.134414                | 2.284633  | 1.339378  |
| 34               | 1                | 0              | -3.378973               | 3.557427  | -1.733622 |
| 35               | 1                | 0              | -1.622892               | 1.868192  | 1.800995  |
| 36               | 1                | 0              | -2.571007               | -3.290885 | 1.269207  |
| 37               | 1                | 0              | 6.065396                | 0.754511  | 1.705783  |
| 38               | 1                | 0              | -3.331042               | 0.611238  | -1.680281 |
| 39               | 1                | 0              | -5.055743               | 4.431648  | 2.123617  |
| 40               | 1                | 0              | -5.076202               | 4.709543  | -0.343198 |
| 41               | 6                | 0              | 0.006962                | 2.748402  | -0.862155 |
| 42               | 6                | 0              | 0.182285                | 4.053982  | -1.046293 |
| 43               | 1                | 0              | 1.179813                | 4.478465  | -0.992231 |
| 44               | 1                | 0              | -0.652789               | 4.719990  | -1.242095 |

-----  
**RCa<sub>homo</sub>**  
 -----

| Center<br>Number | Atomic<br>Number | Atomic<br>Type | Coordinates (Angstroms) |          |           |
|------------------|------------------|----------------|-------------------------|----------|-----------|
|                  |                  |                | X                       | Y        | Z         |
| 1                | 6                | 0              | -0.383774               | 1.496010 | -1.574273 |

|    |    |   |           |           |           |
|----|----|---|-----------|-----------|-----------|
| 2  | 7  | 0 | 0.879010  | 1.551256  | -1.734792 |
| 3  | 6  | 0 | -1.203452 | 2.682614  | -1.293045 |
| 4  | 6  | 0 | -2.612777 | 2.227869  | -0.971049 |
| 5  | 7  | 0 | -2.587509 | 0.799609  | -1.326863 |
| 6  | 6  | 0 | -1.343865 | 0.321642  | -1.669577 |
| 7  | 8  | 0 | -1.065795 | -0.818295 | -1.991691 |
| 8  | 6  | 0 | -3.724714 | -0.017486 | -1.120094 |
| 9  | 6  | 0 | -3.681437 | 3.004748  | -1.709359 |
| 10 | 6  | 0 | 1.762457  | 0.484145  | -1.980193 |
| 11 | 6  | 0 | 1.203435  | 2.681986  | 1.293570  |
| 12 | 6  | 0 | 0.774418  | 3.941160  | 1.347638  |
| 13 | 6  | 0 | -0.774528 | 3.941829  | -1.346878 |
| 14 | 6  | 0 | 0.383826  | 1.495271  | 1.574528  |
| 15 | 6  | 0 | 1.344018  | 0.320997  | 1.669876  |
| 16 | 7  | 0 | 2.587667  | 0.799105  | 1.327341  |
| 17 | 6  | 0 | 2.612812  | 2.227390  | 0.971600  |
| 18 | 6  | 0 | 3.681372  | 3.004384  | 1.709929  |
| 19 | 6  | 0 | 3.724899  | -0.017908 | 1.120403  |
| 20 | 8  | 0 | 1.065978  | -0.818990 | 1.991833  |
| 21 | 6  | 0 | -4.368176 | 4.022703  | -1.049530 |
| 22 | 6  | 0 | -5.315453 | 4.787533  | -1.728461 |
| 23 | 6  | 0 | -5.585445 | 4.528867  | -3.069165 |
| 24 | 6  | 0 | -4.903716 | 3.506882  | -3.730197 |
| 25 | 6  | 0 | -3.952489 | 2.749891  | -3.054735 |
| 26 | 6  | 0 | 4.367848  | 4.022555  | 1.050153  |
| 27 | 6  | 0 | 5.314990  | 4.787536  | 1.729099  |
| 28 | 6  | 0 | 5.585113  | 4.528810  | 3.069766  |
| 29 | 6  | 0 | 4.903654  | 3.506608  | 3.730741  |
| 30 | 6  | 0 | 3.952558  | 2.749463  | 3.055264  |
| 31 | 6  | 0 | 4.736134  | 0.420378  | 0.256615  |
| 32 | 6  | 0 | 5.831769  | -0.388718 | -0.014279 |
| 33 | 6  | 0 | 5.923574  | -1.637546 | 0.586323  |
| 34 | 6  | 0 | 4.944026  | -2.076756 | 1.467034  |
| 35 | 6  | 0 | 3.847893  | -1.266629 | 1.742817  |
| 36 | 6  | 0 | -3.847742 | -1.266011 | -1.742895 |
| 37 | 6  | 0 | -4.943914 | -2.076178 | -1.467386 |
| 38 | 6  | 0 | -5.923450 | -1.637208 | -0.586540 |
| 39 | 6  | 0 | -5.831581 | -0.388591 | 0.014489  |
| 40 | 6  | 0 | -4.735917 | 0.420550  | -0.256147 |
| 41 | 6  | 0 | 1.718616  | -0.764723 | -1.346199 |
| 42 | 6  | 0 | 2.720281  | -1.701563 | -1.566190 |
| 43 | 6  | 0 | 3.762665  | -1.397982 | -2.434759 |
| 44 | 6  | 0 | 3.831376  | -0.165664 | -3.075593 |
| 45 | 6  | 0 | 2.844515  | 0.778160  | -2.822756 |
| 46 | 7  | 0 | -0.878993 | 1.550372  | 1.734782  |
| 47 | 6  | 0 | -1.762393 | 0.483202  | 1.980111  |
| 48 | 6  | 0 | -2.844464 | 0.777163  | 2.822681  |
| 49 | 6  | 0 | -3.831340 | -0.166663 | 3.075436  |
| 50 | 6  | 0 | -3.762666 | -1.398914 | 2.434468  |
| 51 | 6  | 0 | -2.720271 | -1.702443 | 1.565897  |
| 52 | 6  | 0 | -1.718533 | -0.765638 | 1.346062  |
| 53 | 35 | 0 | -7.397069 | -2.754918 | -0.191378 |
| 54 | 35 | 0 | 7.397056  | -2.755274 | 0.190683  |
| 55 | 35 | 0 | 5.154474  | -2.654041 | -2.682943 |
| 56 | 35 | 0 | -5.154546 | -2.654930 | 2.682485  |
| 57 | 1  | 0 | -2.771042 | 2.322889  | 0.111967  |
| 58 | 1  | 0 | 1.439190  | 4.779831  | 1.161940  |
| 59 | 1  | 0 | -0.261771 | 4.146656  | 1.597233  |
| 60 | 1  | 0 | 0.261633  | 4.147456  | -1.596484 |
| 61 | 1  | 0 | -1.439352 | 4.780412  | -1.160960 |
| 62 | 1  | 0 | 2.771099  | 2.322452  | -0.111407 |
| 63 | 1  | 0 | -4.164527 | 4.213948  | 0.002077  |
| 64 | 1  | 0 | -5.846628 | 5.577095  | -1.206381 |
| 65 | 1  | 0 | -6.328275 | 5.117402  | -3.598161 |
| 66 | 1  | 0 | -5.115051 | 3.299150  | -4.774394 |
| 67 | 1  | 0 | -3.422857 | 1.951644  | -3.568694 |
| 68 | 1  | 0 | 4.164095  | 4.213855  | -0.001425 |
| 69 | 1  | 0 | 5.845954  | 5.577267  | 1.207062  |
| 70 | 1  | 0 | 6.327836  | 5.117467  | 3.598775  |
| 71 | 1  | 0 | 5.115094  | 3.298832  | 4.774908  |
| 72 | 1  | 0 | 3.423130  | 1.951052  | 3.569178  |
| 73 | 1  | 0 | 4.672859  | 1.385033  | -0.232151 |
| 74 | 1  | 0 | 6.600185  | -0.054734 | -0.702768 |
| 75 | 1  | 0 | 5.032676  | -3.048043 | 1.940752  |



|    |   |   |           |           |           |
|----|---|---|-----------|-----------|-----------|
| 76 | 1 | 0 | 3.084831  | -1.612123 | 2.424301  |
| 77 | 1 | 0 | -3.084694 | -1.611309 | -2.424496 |
| 78 | 1 | 0 | -5.032616 | -3.047298 | -1.941437 |
| 79 | 1 | 0 | -6.599991 | -0.054796 | 0.703077  |
| 80 | 1 | 0 | -4.672625 | 1.385070  | 0.232883  |
| 81 | 1 | 0 | 0.917703  | -1.002747 | -0.657843 |
| 82 | 1 | 0 | 2.700085  | -2.654891 | -1.049809 |
| 83 | 1 | 0 | 4.659682  | 0.061533  | -3.737512 |
| 84 | 1 | 0 | 2.892170  | 1.760535  | -3.282082 |
| 85 | 1 | 0 | -2.892117 | 1.759507  | 3.282076  |
| 86 | 1 | 0 | -4.659648 | 0.060497  | 3.737368  |
| 87 | 1 | 0 | -2.700088 | -2.655724 | 1.049431  |
| 88 | 1 | 0 | -0.917587 | -1.003658 | 0.657741  |

-----  
**RCa<sub>hetero</sub>**  
 -----

| Center<br>Number | Atomic<br>Number | Atomic<br>Type | Coordinates (Angstroms) |           |           |
|------------------|------------------|----------------|-------------------------|-----------|-----------|
|                  |                  |                | X                       | Y         | Z         |
| 1                | 6                | 0              | -0.468563               | 1.372347  | -1.998500 |
| 2                | 7                | 0              | 0.793849                | 1.306817  | -2.164115 |
| 3                | 6                | 0              | -1.194058               | 2.651451  | -2.084284 |
| 4                | 6                | 0              | -2.683776               | 2.370048  | -2.072987 |
| 5                | 7                | 0              | -2.738157               | 0.936414  | -1.746424 |
| 6                | 6                | 0              | -1.520795               | 0.297061  | -1.762969 |
| 7                | 8                | 0              | -1.342589               | -0.900145 | -1.639240 |
| 8                | 6                | 0              | -3.976942               | 0.274454  | -1.564315 |
| 9                | 6                | 0              | -3.455487               | 3.233085  | -1.099015 |
| 10               | 6                | 0              | 1.644749                | 0.191728  | -2.093973 |
| 11               | 6                | 0              | 0.959411                | 2.363501  | 0.967618  |
| 12               | 6                | 0              | 0.304572                | 3.520729  | 0.898097  |
| 13               | 6                | 0              | -0.625279               | 3.853995  | -2.135955 |
| 14               | 6                | 0              | 0.378904                | 1.074425  | 1.371727  |
| 15               | 6                | 0              | 1.549650                | 0.142214  | 1.634930  |
| 16               | 7                | 0              | 2.681615                | 0.797895  | 1.205100  |
| 17               | 6                | 0              | 2.431073                | 2.149373  | 0.679436  |
| 18               | 6                | 0              | 3.326128                | 3.205464  | 1.290820  |
| 19               | 6                | 0              | 3.929707                | 0.166754  | 0.990837  |
| 20               | 8                | 0              | 1.492102                | -0.970084 | 2.124176  |
| 21               | 6                | 0              | -4.245642               | 4.280252  | -1.566343 |
| 22               | 6                | 0              | -4.916318               | 5.108662  | -0.666218 |
| 23               | 6                | 0              | -4.802497               | 4.884625  | 0.702346  |
| 24               | 6                | 0              | -4.013492               | 3.832595  | 1.170978  |
| 25               | 6                | 0              | -3.340772               | 3.009631  | 0.274466  |
| 26               | 6                | 0              | 3.753333                | 4.275215  | 0.504976  |
| 27               | 6                | 0              | 4.525571                | 5.293136  | 1.061719  |
| 28               | 6                | 0              | 4.881362                | 5.238451  | 2.406510  |
| 29               | 6                | 0              | 4.460358                | 4.166220  | 3.192954  |
| 30               | 6                | 0              | 3.682150                | 3.154880  | 2.639126  |
| 31               | 6                | 0              | 4.831947                | 0.724131  | 0.076824  |
| 32               | 6                | 0              | 6.025061                | 0.077126  | -0.222327 |
| 33               | 6                | 0              | 6.325172                | -1.123778 | 0.403168  |
| 34               | 6                | 0              | 5.459226                | -1.674444 | 1.338970  |
| 35               | 6                | 0              | 4.267934                | -1.028527 | 1.643047  |
| 36               | 6                | 0              | -4.066371               | -0.853796 | -0.742855 |
| 37               | 6                | 0              | -5.293365               | -1.469752 | -0.530095 |
| 38               | 6                | 0              | -6.430717               | -0.957822 | -1.142477 |
| 39               | 6                | 0              | -6.360782               | 0.163385  | -1.959654 |
| 40               | 6                | 0              | -5.132338               | 0.780294  | -2.167698 |
| 41               | 6                | 0              | 1.493866                | -0.901000 | -1.230579 |
| 42               | 6                | 0              | 2.467458                | -1.890051 | -1.161271 |
| 43               | 6                | 0              | 3.585622                | -1.806667 | -1.984943 |
| 44               | 6                | 0              | 3.758639                | -0.735233 | -2.855904 |
| 45               | 6                | 0              | 2.803294                | 0.271585  | -2.883149 |
| 46               | 7                | 0              | -0.877638               | 0.889835  | 1.467982  |
| 47               | 6                | 0              | -1.596370               | -0.269510 | 1.803436  |
| 48               | 6                | 0              | -1.251948               | -1.587159 | 1.465495  |
| 49               | 6                | 0              | -2.136674               | -2.630068 | 1.714434  |
| 50               | 6                | 0              | -3.361518               | -2.363059 | 2.317180  |
| 51               | 6                | 0              | -3.719358               | -1.070513 | 2.683494  |
| 52               | 6                | 0              | -2.841736               | -0.031776 | 2.405612  |
| 53               | 35               | 0              | -8.105617               | -1.793680 | -0.845418 |
| 54               | 35               | 0              | 7.906930                | -2.049909 | -0.059172 |
| 55               | 35               | 0              | 4.909594                | -3.154703 | -1.903296 |

|    |    |   |           |           |           |
|----|----|---|-----------|-----------|-----------|
| 56 | 35 | 0 | -4.592262 | -3.776732 | 2.583837  |
| 57 | 1  | 0 | -3.083946 | 2.524030  | -3.084525 |
| 58 | 1  | 0 | 0.811070  | 4.444136  | 0.631875  |
| 59 | 1  | 0 | -0.757794 | 3.563522  | 1.119046  |
| 60 | 1  | 0 | 0.457440  | 3.936590  | -2.143660 |
| 61 | 1  | 0 | -1.215807 | 4.764891  | -2.167014 |
| 62 | 1  | 0 | 2.571668  | 2.137552  | -0.410811 |
| 63 | 1  | 0 | -4.340957 | 4.448443  | -2.636934 |
| 64 | 1  | 0 | -5.531602 | 5.922237  | -1.037204 |
| 65 | 1  | 0 | -5.328016 | 5.524664  | 1.403954  |
| 66 | 1  | 0 | -3.922979 | 3.656294  | 2.239005  |
| 67 | 1  | 0 | -2.711936 | 2.195798  | 0.630867  |
| 68 | 1  | 0 | 3.484049  | 4.307851  | -0.548965 |
| 69 | 1  | 0 | 4.854979  | 6.121465  | 0.442495  |
| 70 | 1  | 0 | 5.489232  | 6.025680  | 2.840941  |
| 71 | 1  | 0 | 4.739807  | 4.117841  | 4.240682  |
| 72 | 1  | 0 | 3.355001  | 2.318240  | 3.250975  |
| 73 | 1  | 0 | 4.613501  | 1.655902  | -0.429380 |
| 74 | 1  | 0 | 6.708260  | 0.503493  | -0.948398 |
| 75 | 1  | 0 | 5.707685  | -2.610609 | 1.826202  |
| 76 | 1  | 0 | 3.594529  | -1.461126 | 2.367170  |
| 77 | 1  | 0 | -3.179080 | -1.248214 | -0.267120 |
| 78 | 1  | 0 | -5.360728 | -2.328183 | 0.131048  |
| 79 | 1  | 0 | -7.255751 | 0.556825  | -2.427934 |
| 80 | 1  | 0 | -5.088828 | 1.660370  | -2.799305 |
| 81 | 1  | 0 | 0.607497  | -0.973714 | -0.617090 |
| 82 | 1  | 0 | 2.357593  | -2.717450 | -0.468449 |
| 83 | 1  | 0 | 4.643470  | -0.677939 | -3.480156 |
| 84 | 1  | 0 | 2.932864  | 1.136382  | -3.526052 |
| 85 | 1  | 0 | -0.302666 | -1.806090 | 0.998912  |
| 86 | 1  | 0 | -1.879859 | -3.643807 | 1.428512  |
| 87 | 1  | 0 | -4.681713 | -0.876768 | 3.143482  |
| 88 | 1  | 0 | -3.115665 | 0.990665  | 2.646115  |

-----  
**RCa<sub>homo</sub>-in/in**  
 -----

| Center<br>Number | Atomic<br>Number | Atomic<br>Type | Coordinates (Angstroms) |           |           |
|------------------|------------------|----------------|-------------------------|-----------|-----------|
|                  |                  |                | X                       | Y         | Z         |
| 1                | 6                | 0              | -0.733329               | 1.535456  | -1.387565 |
| 2                | 7                | 0              | 0.513198                | 1.328812  | -1.532641 |
| 3                | 6                | 0              | -1.295578               | 2.846636  | -1.039540 |
| 4                | 6                | 0              | -2.809699               | 2.738788  | -1.029961 |
| 5                | 7                | 0              | -3.043793               | 1.303398  | -1.276661 |
| 6                | 6                | 0              | -1.904033               | 0.592538  | -1.590385 |
| 7                | 8                | 0              | -1.852631               | -0.556980 | -1.979042 |
| 8                | 6                | 0              | -4.355861               | 0.778992  | -1.369006 |
| 9                | 6                | 0              | -3.431877               | 3.246988  | 0.255586  |
| 10               | 6                | 0              | 1.130844                | 0.095594  | -1.799636 |
| 11               | 6                | 0              | 1.070671                | 2.171792  | 1.937962  |
| 12               | 6                | 0              | 0.259409                | 3.217066  | 2.093553  |
| 13               | 6                | 0              | -0.582311               | 3.938222  | -0.767352 |
| 14               | 6                | 0              | 0.643425                | 0.765394  | 1.915500  |
| 15               | 6                | 0              | 1.894894                | -0.067795 | 1.686945  |
| 16               | 7                | 0              | 2.920525                | 0.825805  | 1.472712  |
| 17               | 6                | 0              | 2.583116                | 2.222004  | 1.786736  |
| 18               | 6                | 0              | 3.040453                | 3.226694  | 0.750076  |
| 19               | 6                | 0              | 4.234985                | 0.429971  | 1.129038  |
| 20               | 8                | 0              | 1.976977                | -1.279009 | 1.652946  |
| 21               | 6                | 0              | -4.120805               | 4.458704  | 0.261172  |
| 22               | 6                | 0              | -4.653013               | 4.959046  | 1.449071  |
| 23               | 6                | 0              | -4.502397               | 4.245967  | 2.634166  |
| 24               | 6                | 0              | -3.811277               | 3.033625  | 2.631420  |
| 25               | 6                | 0              | -3.275067               | 2.537015  | 1.447142  |
| 26               | 6                | 0              | 3.268927                | 4.544230  | 1.149917  |
| 27               | 6                | 0              | 3.601689                | 5.518120  | 0.211190  |
| 28               | 6                | 0              | 3.724878                | 5.174175  | -1.133231 |
| 29               | 6                | 0              | 3.520316                | 3.853991  | -1.530870 |
| 30               | 6                | 0              | 3.176769                | 2.882839  | -0.593739 |
| 31               | 6                | 0              | 5.330256                | 1.195713  | 1.538712  |
| 32               | 6                | 0              | 6.616968                | 0.835303  | 1.154046  |
| 33               | 6                | 0              | 6.802622                | -0.287786 | 0.357179  |
| 34               | 6                | 0              | 5.722662                | -1.055452 | -0.063461 |
| 35               | 6                | 0              | 4.438548                | -0.694756 | 0.323825  |

|    |    |   |           |           |           |
|----|----|---|-----------|-----------|-----------|
| 36 | 6  | 0 | -4.593996 | -0.600953 | -1.292079 |
| 37 | 6  | 0 | -5.892897 | -1.092013 | -1.350547 |
| 38 | 6  | 0 | -6.958973 | -0.211790 | -1.488625 |
| 39 | 6  | 0 | -6.741684 | 1.156625  | -1.570503 |
| 40 | 6  | 0 | -5.443216 | 1.649632  | -1.510868 |
| 41 | 6  | 0 | 0.824426  | -1.097560 | -1.134862 |
| 42 | 6  | 0 | 1.601784  | -2.231445 | -1.334939 |
| 43 | 6  | 0 | 2.682269  | -2.171354 | -2.208165 |
| 44 | 6  | 0 | 2.994078  | -1.006151 | -2.900104 |
| 45 | 6  | 0 | 2.225698  | 0.128605  | -2.676878 |
| 46 | 7  | 0 | -0.576758 | 0.404717  | 1.986805  |
| 47 | 6  | 0 | -1.038304 | -0.920411 | 2.074229  |
| 48 | 6  | 0 | -2.200835 | -1.234144 | 1.356055  |
| 49 | 6  | 0 | -2.766639 | -2.501007 | 1.432831  |
| 50 | 6  | 0 | -2.190981 | -3.444164 | 2.275804  |
| 51 | 6  | 0 | -1.067688 | -3.139173 | 3.039397  |
| 52 | 6  | 0 | -0.492731 | -1.879703 | 2.935817  |
| 53 | 35 | 0 | -8.727083 | -0.886164 | -1.565423 |
| 54 | 35 | 0 | 8.556592  | -0.771660 | -0.175085 |
| 55 | 35 | 0 | 3.840663  | -3.663860 | -2.352903 |
| 56 | 35 | 0 | -2.964833 | -5.167690 | 2.409602  |
| 57 | 1  | 0 | -3.218982 | 3.310909  | -1.873059 |
| 58 | 1  | 0 | 0.634433  | 4.236620  | 2.095815  |
| 59 | 1  | 0 | -0.808819 | 3.065100  | 2.214618  |
| 60 | 1  | 0 | 0.503533  | 3.901109  | -0.813334 |
| 61 | 1  | 0 | -1.059103 | 4.875789  | -0.493283 |
| 62 | 1  | 0 | 3.029866  | 2.488055  | 2.754579  |
| 63 | 1  | 0 | -4.246274 | 5.011220  | -0.667175 |
| 64 | 1  | 0 | -5.189864 | 5.903228  | 1.443223  |
| 65 | 1  | 0 | -4.921737 | 4.630319  | 3.558001  |
| 66 | 1  | 0 | -3.685594 | 2.474203  | 3.553340  |
| 67 | 1  | 0 | -2.704205 | 1.611898  | 1.456423  |
| 68 | 1  | 0 | 3.189376  | 4.810006  | 2.202255  |
| 69 | 1  | 0 | 3.773693  | 6.540634  | 0.531556  |
| 70 | 1  | 0 | 3.990807  | 5.928788  | -1.865963 |
| 71 | 1  | 0 | 3.629304  | 3.577677  | -2.575656 |
| 72 | 1  | 0 | 3.017478  | 1.855594  | -0.905281 |
| 73 | 1  | 0 | 5.188250  | 2.082732  | 2.146799  |
| 74 | 1  | 0 | 7.467629  | 1.428010  | 1.470844  |
| 75 | 1  | 0 | 5.867618  | -1.921595 | -0.700797 |
| 76 | 1  | 0 | 3.595635  | -1.286692 | -0.004658 |
| 77 | 1  | 0 | -3.767384 | -1.292550 | -1.206558 |
| 78 | 1  | 0 | -6.069971 | -2.159708 | -1.289499 |
| 79 | 1  | 0 | -7.577526 | 1.838839  | -1.678766 |
| 80 | 1  | 0 | -5.295082 | 2.720314  | -1.568695 |
| 81 | 1  | 0 | -0.000058 | -1.133057 | -0.432398 |
| 82 | 1  | 0 | 1.391691  | -3.140038 | -0.781981 |
| 83 | 1  | 0 | 3.847530  | -0.975725 | -3.568255 |
| 84 | 1  | 0 | 2.466918  | 1.062607  | -3.175226 |
| 85 | 1  | 0 | -2.660929 | -0.472735 | 0.734931  |
| 86 | 1  | 0 | -3.657804 | -2.742810 | 0.864522  |
| 87 | 1  | 0 | -0.644865 | -3.880880 | 3.706528  |
| 88 | 1  | 0 | 0.381628  | -1.635346 | 3.527428  |

-----  
**RCa<sub>homo</sub>-exo**  
 -----

| Center Number | Atomic Number | Atomic Type | Coordinates (Angstroms) |           |           |
|---------------|---------------|-------------|-------------------------|-----------|-----------|
|               |               |             | X                       | Y         | Z         |
| 1             | 6             | 0           | 0.646407                | -1.073245 | -0.959465 |
| 2             | 7             | 0           | -0.599583               | -0.834370 | -1.088823 |
| 3             | 6             | 0           | 1.159573                | -2.220190 | -0.190734 |
| 4             | 6             | 0           | 2.591758                | -1.897660 | 0.191694  |
| 5             | 7             | 0           | 2.962040                | -0.908475 | -0.836890 |
| 6             | 6             | 0           | 1.883911                | -0.355153 | -1.486472 |
| 7             | 8             | 0           | 1.929460                | 0.516648  | -2.334346 |
| 8             | 6             | 0           | 4.280822                | -0.410902 | -0.948200 |
| 9             | 6             | 0           | 3.497079                | -3.105117 | 0.227903  |
| 10            | 6             | 0           | -1.233696               | 0.274815  | -1.678345 |
| 11            | 6             | 0           | -0.354009               | -1.307987 | 2.871571  |
| 12            | 6             | 0           | 0.594926                | -2.124118 | 3.323768  |
| 13            | 6             | 0           | 0.514216                | -3.357697 | 0.054083  |
| 14            | 6             | 0           | -1.556114               | -1.737409 | 2.140895  |
| 15            | 6             | 0           | -2.252054               | -0.478990 | 1.651007  |

|    |    |   |           |           |           |
|----|----|---|-----------|-----------|-----------|
| 16 | 7  | 0 | -1.504600 | 0.586231  | 2.113950  |
| 17 | 6  | 0 | -0.377905 | 0.207176  | 2.980155  |
| 18 | 6  | 0 | 0.940631  | 0.840102  | 2.585804  |
| 19 | 6  | 0 | -1.878233 | 1.943191  | 1.955053  |
| 20 | 8  | 0 | -3.294237 | -0.417370 | 1.032809  |
| 21 | 6  | 0 | 3.835865  | -3.671946 | 1.454941  |
| 22 | 6  | 0 | 4.616380  | -4.826107 | 1.505447  |
| 23 | 6  | 0 | 5.068442  | -5.410135 | 0.325939  |
| 24 | 6  | 0 | 4.734432  | -4.841857 | -0.903926 |
| 25 | 6  | 0 | 3.947150  | -3.696988 | -0.953831 |
| 26 | 6  | 0 | 1.950277  | 0.963818  | 3.541262  |
| 27 | 6  | 0 | 3.203019  | 1.456227  | 3.179740  |
| 28 | 6  | 0 | 3.449296  | 1.841464  | 1.863623  |
| 29 | 6  | 0 | 2.435292  | 1.741656  | 0.911870  |
| 30 | 6  | 0 | 1.186171  | 1.243154  | 1.273564  |
| 31 | 6  | 0 | -1.427111 | 2.901683  | 2.869882  |
| 32 | 6  | 0 | -1.755252 | 4.242281  | 2.704676  |
| 33 | 6  | 0 | -2.529043 | 4.626931  | 1.617249  |
| 34 | 6  | 0 | -2.977378 | 3.690743  | 0.694219  |
| 35 | 6  | 0 | -2.654931 | 2.349691  | 0.863450  |
| 36 | 6  | 0 | 4.749792  | 0.112530  | -2.158190 |
| 37 | 6  | 0 | 6.048609  | 0.600169  | -2.247666 |
| 38 | 6  | 0 | 6.878902  | 0.554575  | -1.134586 |
| 39 | 6  | 0 | 6.432198  | 0.024466  | 0.069775  |
| 40 | 6  | 0 | 5.132153  | -0.456963 | 0.161254  |
| 41 | 6  | 0 | -0.701647 | 1.568596  | -1.803030 |
| 42 | 6  | 0 | -1.492550 | 2.616980  | -2.256840 |
| 43 | 6  | 0 | -2.817745 | 2.378104  | -2.600536 |
| 44 | 6  | 0 | -3.367373 | 1.103527  | -2.509600 |
| 45 | 6  | 0 | -2.576534 | 0.066947  | -2.033566 |
| 46 | 7  | 0 | -1.921621 | -2.951634 | 2.054016  |
| 47 | 6  | 0 | -3.012992 | -3.397308 | 1.286080  |
| 48 | 6  | 0 | -3.134388 | -3.100094 | -0.076010 |
| 49 | 6  | 0 | -4.159263 | -3.661149 | -0.826110 |
| 50 | 6  | 0 | -5.073500 | -4.506431 | -0.204852 |
| 51 | 6  | 0 | -4.965082 | -4.819216 | 1.145405  |
| 52 | 6  | 0 | -3.916253 | -4.281841 | 1.882771  |
| 53 | 35 | 0 | 8.648398  | 1.219547  | -1.261541 |
| 54 | 35 | 0 | -2.962303 | 6.456268  | 1.377812  |
| 55 | 35 | 0 | -3.910979 | 3.828183  | -3.133100 |
| 56 | 35 | 0 | -6.482482 | -5.261956 | -1.224477 |
| 57 | 1  | 0 | 2.592303  | -1.403031 | 1.177410  |
| 58 | 1  | 0 | 0.493932  | -3.195857 | 3.179746  |
| 59 | 1  | 0 | 1.476415  | -1.753619 | 3.838895  |
| 60 | 1  | 0 | -0.498225 | -3.506562 | -0.305858 |
| 61 | 1  | 0 | 0.986216  | -4.169412 | 0.599862  |
| 62 | 1  | 0 | -0.613430 | 0.482619  | 4.017467  |
| 63 | 1  | 0 | 3.490538  | -3.205525 | 2.375389  |
| 64 | 1  | 0 | 4.875156  | -5.261605 | 2.465312  |
| 65 | 1  | 0 | 5.682207  | -6.304528 | 0.362197  |
| 66 | 1  | 0 | 5.087929  | -5.293436 | -1.825402 |
| 67 | 1  | 0 | 3.683097  | -3.253146 | -1.910491 |
| 68 | 1  | 0 | 1.755605  | 0.678423  | 4.572732  |
| 69 | 1  | 0 | 3.982557  | 1.547615  | 3.929490  |
| 70 | 1  | 0 | 4.424519  | 2.223343  | 1.578653  |
| 71 | 1  | 0 | 2.620540  | 2.045292  | -0.115996 |
| 72 | 1  | 0 | 0.380836  | 1.187126  | 0.547002  |
| 73 | 1  | 0 | -0.807237 | 2.619505  | 3.713010  |
| 74 | 1  | 0 | -1.403836 | 4.980725  | 3.416203  |
| 75 | 1  | 0 | -3.551634 | 4.001673  | -0.173208 |
| 76 | 1  | 0 | -3.001365 | 1.622146  | 0.142314  |
| 77 | 1  | 0 | 4.102706  | 0.140796  | -3.023811 |
| 78 | 1  | 0 | 6.413083  | 1.006734  | -3.184174 |
| 79 | 1  | 0 | 7.089804  | -0.010811 | 0.930979  |
| 80 | 1  | 0 | 4.784733  | -0.859729 | 1.106063  |
| 81 | 1  | 0 | 0.327099  | 1.771525  | -1.542291 |
| 82 | 1  | 0 | -1.084378 | 3.619328  | -2.323197 |
| 83 | 1  | 0 | -4.405245 | 0.932879  | -2.771692 |
| 84 | 1  | 0 | -3.005738 | -0.920301 | -1.907340 |
| 85 | 1  | 0 | -2.411888 | -2.428577 | -0.530921 |
| 86 | 1  | 0 | -4.253071 | -3.441255 | -1.884298 |
| 87 | 1  | 0 | -5.680721 | -5.487871 | 1.610366  |
| 88 | 1  | 0 | -3.795602 | -4.534352 | 2.931099  |

**RCa<sub>hetero</sub>-EXO**

| Center Number | Atomic Number | Atomic Type | Coordinates (Angstroms) |           |           |
|---------------|---------------|-------------|-------------------------|-----------|-----------|
|               |               |             | X                       | Y         | Z         |
| 1             | 6             | 0           | 3.263060                | -2.893664 | 0.118388  |
| 2             | 6             | 0           | 3.090337                | -3.254993 | -1.223547 |
| 3             | 6             | 0           | 3.960276                | -4.179211 | -1.809192 |
| 4             | 6             | 0           | 5.028575                | -4.695106 | -1.084796 |
| 5             | 6             | 0           | 5.191866                | -4.316305 | 0.242794  |
| 6             | 6             | 0           | 4.312197                | -3.428916 | 0.854396  |
| 7             | 7             | 0           | 1.973262                | -2.828422 | -1.967592 |
| 8             | 6             | 0           | 1.661019                | -1.607842 | -2.134598 |
| 9             | 6             | 0           | 0.437036                | -1.154420 | -2.804719 |
| 10            | 6             | 0           | 0.481472                | 0.359229  | -2.917269 |
| 11            | 7             | 0           | 1.726376                | 0.716966  | -2.211438 |
| 12            | 6             | 0           | 2.465999                | -0.368097 | -1.793946 |
| 13            | 6             | 0           | -0.539971               | -1.951055 | -3.231603 |
| 14            | 8             | 0           | 3.571212                | -0.343433 | -1.288070 |
| 15            | 6             | 0           | 2.166020                | 2.062282  | -2.146813 |
| 16            | 6             | 0           | 1.529641                | 3.033435  | -2.931394 |
| 17            | 6             | 0           | 1.922070                | 4.364779  | -2.871529 |
| 18            | 6             | 0           | 2.956136                | 4.736532  | -2.023350 |
| 19            | 6             | 0           | 3.602244                | 3.789509  | -1.240077 |
| 20            | 6             | 0           | 3.212844                | 2.456461  | -1.299071 |
| 21            | 6             | 0           | -0.748893               | 1.046876  | -2.355344 |
| 22            | 6             | 0           | -1.767135               | 1.437722  | -3.225179 |
| 23            | 6             | 0           | -2.906167               | 2.077271  | -2.738246 |
| 24            | 6             | 0           | -3.030028               | 2.336080  | -1.375190 |
| 25            | 6             | 0           | -2.012513               | 1.948725  | -0.502793 |
| 26            | 6             | 0           | -0.880168               | 1.299033  | -0.989091 |
| 27            | 35            | 0           | 3.490291                | 6.551059  | -1.934534 |
| 28            | 35            | 0           | 6.631185                | -5.038982 | 1.245294  |
| 29            | 7             | 0           | 0.442083                | -1.192799 | 1.247591  |
| 30            | 6             | 0           | 0.909580                | -0.168266 | 2.093568  |
| 31            | 6             | 0           | 1.915101                | 0.667708  | 1.598699  |
| 32            | 6             | 0           | 2.462365                | 1.668084  | 2.394003  |
| 33            | 6             | 0           | 2.037929                | 1.787202  | 3.711121  |
| 34            | 6             | 0           | 1.079139                | 0.927577  | 4.241209  |
| 35            | 6             | 0           | 0.512990                | -0.045929 | 3.430824  |
| 36            | 35            | 0           | 2.793419                | 3.128721  | 4.816132  |
| 37            | 6             | 0           | -0.788332               | -1.464719 | 1.061892  |
| 38            | 6             | 0           | -1.263608               | -2.611706 | 0.279578  |
| 39            | 6             | 0           | -2.775196               | -2.521818 | 0.161609  |
| 40            | 7             | 0           | -3.103072               | -1.309739 | 0.928396  |
| 41            | 6             | 0           | -2.018499               | -0.685655 | 1.499000  |
| 42            | 6             | 0           | -0.492396               | -3.601213 | -0.166336 |
| 43            | 6             | 0           | -3.280705               | -2.474372 | -1.269702 |
| 44            | 6             | 0           | -3.485242               | -3.675665 | -1.951971 |
| 45            | 6             | 0           | -3.925172               | -3.669175 | -3.273105 |
| 46            | 6             | 0           | -4.195284               | -2.459622 | -3.911424 |
| 47            | 6             | 0           | -4.006903               | -1.261020 | -3.226770 |
| 48            | 6             | 0           | -3.535449               | -1.265193 | -1.915750 |
| 49            | 6             | 0           | -4.447809               | -0.898412 | 1.096012  |
| 50            | 6             | 0           | -4.772578               | 0.415475  | 1.459904  |
| 51            | 6             | 0           | -6.103370               | 0.792168  | 1.599480  |
| 52            | 6             | 0           | -7.112835               | -0.133843 | 1.371409  |
| 53            | 6             | 0           | -6.809074               | -1.436920 | 0.999573  |
| 54            | 6             | 0           | -5.479794               | -1.815473 | 0.860752  |
| 55            | 8             | 0           | -2.035244               | 0.312167  | 2.193540  |
| 56            | 35            | 0           | -8.923598               | 0.387730  | 1.560148  |
| 57            | 1             | 0           | -3.216747               | -3.392167 | 0.663320  |
| 58            | 1             | 0           | -0.454823               | -3.025084 | -3.094905 |
| 59            | 1             | 0           | -1.434538               | -1.566523 | -3.711124 |
| 60            | 1             | 0           | 0.574806                | -3.590640 | 0.029321  |
| 61            | 1             | 0           | -0.897315               | -4.439084 | -0.726362 |
| 62            | 1             | 0           | 0.588367                | 0.637534  | -3.974145 |
| 63            | 1             | 0           | -3.311923               | -4.622492 | -1.445034 |
| 64            | 1             | 0           | -4.076331               | -4.608435 | -3.795607 |
| 65            | 1             | 0           | -4.559157               | -2.453188 | -4.934014 |
| 66            | 1             | 0           | -4.217874               | -0.313508 | -3.713234 |
| 67            | 1             | 0           | -3.377154               | -0.324921 | -1.393840 |
| 68            | 1             | 0           | -1.663035               | 1.253894  | -4.292702 |
| 69            | 1             | 0           | -3.688665               | 2.383149  | -3.426132 |

|    |   |   |           |           |           |
|----|---|---|-----------|-----------|-----------|
| 70 | 1 | 0 | -3.910721 | 2.843238  | -0.993357 |
| 71 | 1 | 0 | -2.088533 | 2.154251  | 0.559764  |
| 72 | 1 | 0 | -0.079976 | 1.020916  | -0.306551 |
| 73 | 1 | 0 | 0.712962  | 2.770296  | -3.591427 |
| 74 | 1 | 0 | 1.419702  | 5.106120  | -3.482310 |
| 75 | 1 | 0 | 4.411810  | 4.085245  | -0.582116 |
| 76 | 1 | 0 | 3.740837  | 1.726577  | -0.703563 |
| 77 | 1 | 0 | -3.991890 | 1.138526  | 1.642553  |
| 78 | 1 | 0 | -6.349781 | 1.809327  | 1.882679  |
| 79 | 1 | 0 | -7.600850 | -2.154055 | 0.815699  |
| 80 | 1 | 0 | -5.262532 | -2.831825 | 0.555001  |
| 81 | 1 | 0 | 2.270367  | 0.525060  | 0.583902  |
| 82 | 1 | 0 | 3.221316  | 2.334085  | 1.997952  |
| 83 | 1 | 0 | 0.774324  | 1.024732  | 5.277033  |
| 84 | 1 | 0 | -0.239341 | -0.716045 | 3.831660  |
| 85 | 1 | 0 | 3.799273  | -4.479244 | -2.839456 |
| 86 | 1 | 0 | 5.718389  | -5.395410 | -1.542249 |
| 87 | 1 | 0 | 4.449155  | -3.154007 | 1.894347  |
| 88 | 1 | 0 | 2.561526  | -2.201964 | 0.577608  |

-----  
**RCa<sub>hetero</sub>-exo'**

| Center<br>Number | Atomic<br>Number | Atomic<br>Type | Coordinates (Angstroms) |           |           |
|------------------|------------------|----------------|-------------------------|-----------|-----------|
|                  |                  |                | X                       | Y         | Z         |
| 1                | 6                | 0              | 0.394106                | -2.293845 | -1.027140 |
| 2                | 7                | 0              | -0.865093               | -2.356226 | -1.193597 |
| 3                | 6                | 0              | 1.153701                | -3.332359 | -0.316930 |
| 4                | 6                | 0              | 2.597872                | -2.884457 | -0.200045 |
| 5                | 7                | 0              | 2.605499                | -1.577646 | -0.882425 |
| 6                | 6                | 0              | 1.398101                | -1.240550 | -1.465372 |
| 7                | 8                | 0              | 1.177061                | -0.284091 | -2.180558 |
| 8                | 6                | 0              | 3.773444                | -0.775091 | -0.895013 |
| 9                | 6                | 0              | 3.570073                | -3.879490 | -0.804865 |
| 10               | 6                | 0              | -1.703744               | -1.386485 | -1.766814 |
| 11               | 6                | 0              | -0.792885               | -1.705591 | 2.294542  |
| 12               | 6                | 0              | -0.548161               | -2.927177 | 2.762940  |
| 13               | 6                | 0              | 0.645845                | -4.467305 | 0.158313  |
| 14               | 6                | 0              | -2.122973               | -1.153251 | 1.987758  |
| 15               | 6                | 0              | -1.916418               | 0.312088  | 1.629839  |
| 16               | 7                | 0              | -0.554676               | 0.525847  | 1.635692  |
| 17               | 6                | 0              | 0.253691                | -0.656707 | 1.977298  |
| 18               | 6                | 0              | 1.240675                | -0.378305 | 3.091091  |
| 19               | 6                | 0              | 0.051496                | 1.737288  | 1.224313  |
| 20               | 8                | 0              | -2.771238               | 1.145296  | 1.411291  |
| 21               | 6                | 0              | 4.228730                | -4.783547 | 0.027606  |
| 22               | 6                | 0              | 5.075744                | -5.748205 | -0.514354 |
| 23               | 6                | 0              | 5.273099                | -5.805216 | -1.891300 |
| 24               | 6                | 0              | 4.620762                | -4.896918 | -2.724390 |
| 25               | 6                | 0              | 3.769349                | -3.938182 | -2.184506 |
| 26               | 6                | 0              | 0.787836                | -0.017070 | 4.361971  |
| 27               | 6                | 0              | 1.698803                | 0.243580  | 5.378783  |
| 28               | 6                | 0              | 3.070089                | 0.144250  | 5.135256  |
| 29               | 6                | 0              | 3.526160                | -0.211019 | 3.870118  |
| 30               | 6                | 0              | 2.609779                | -0.467505 | 2.851481  |
| 31               | 6                | 0              | 1.295067                | 1.703514  | 0.583087  |
| 32               | 6                | 0              | 1.904045                | 2.878003  | 0.159712  |
| 33               | 6                | 0              | 1.263581                | 4.090935  | 0.376070  |
| 34               | 6                | 0              | 0.029789                | 4.143922  | 1.013729  |
| 35               | 6                | 0              | -0.576226               | 2.968945  | 1.443173  |
| 36               | 6                | 0              | 3.866054                | 0.392955  | -1.668118 |
| 37               | 6                | 0              | 5.010834                | 1.180805  | -1.607038 |
| 38               | 6                | 0              | 6.068248                | 0.812602  | -0.785757 |
| 39               | 6                | 0              | 5.999334                | -0.347348 | -0.025538 |
| 40               | 6                | 0              | 4.858823                | -1.138323 | -0.082841 |
| 41               | 6                | 0              | -1.605722               | -0.008290 | -1.531525 |
| 42               | 6                | 0              | -2.587324               | 0.857126  | -1.999924 |
| 43               | 6                | 0              | -3.653879               | 0.344465  | -2.731668 |
| 44               | 6                | 0              | -3.761924               | -1.017321 | -2.997413 |
| 45               | 6                | 0              | -2.799580               | -1.878908 | -2.489425 |
| 46               | 7                | 0              | -3.202708               | -1.817623 | 2.087654  |
| 47               | 6                | 0              | -4.461194               | -1.328964 | 1.689351  |
| 48               | 6                | 0              | -5.551311               | -1.543701 | 2.537388  |
| 49               | 6                | 0              | -6.826462               | -1.138469 | 2.157921  |

|    |    |   |           |           |           |
|----|----|---|-----------|-----------|-----------|
| 50 | 6  | 0 | -7.008699 | -0.556445 | 0.908489  |
| 51 | 6  | 0 | -5.943058 | -0.371007 | 0.032838  |
| 52 | 6  | 0 | -4.672080 | -0.761257 | 0.428470  |
| 53 | 35 | 0 | 7.618755  | 1.893748  | -0.708244 |
| 54 | 35 | 0 | 2.087749  | 5.694512  | -0.203099 |
| 55 | 35 | 0 | -5.028803 | 1.505082  | -3.319374 |
| 56 | 35 | 0 | -8.748976 | -0.019991 | 0.378021  |
| 57 | 1  | 0 | 2.842956  | -2.739010 | 0.861193  |
| 58 | 1  | 0 | -1.368434 | -3.615131 | 2.943091  |
| 59 | 1  | 0 | 0.462965  | -3.258559 | 2.981343  |
| 60 | 1  | 0 | -0.411375 | -4.678356 | 0.031366  |
| 61 | 1  | 0 | 1.263550  | -5.201885 | 0.666695  |
| 62 | 1  | 0 | 0.821393  | -0.977573 | 1.092440  |
| 63 | 1  | 0 | 4.083795  | -4.728833 | 1.104615  |
| 64 | 1  | 0 | 5.585821  | -6.447356 | 0.140546  |
| 65 | 1  | 0 | 5.937367  | -6.551308 | -2.315340 |
| 66 | 1  | 0 | 4.776135  | -4.934528 | -3.797845 |
| 67 | 1  | 0 | 3.265380  | -3.229133 | -2.836552 |
| 68 | 1  | 0 | -0.280356 | 0.057263  | 4.551784  |
| 69 | 1  | 0 | 1.341159  | 0.524510  | 6.364209  |
| 70 | 1  | 0 | 3.778564  | 0.349398  | 5.931406  |
| 71 | 1  | 0 | 4.590449  | -0.278834 | 3.667177  |
| 72 | 1  | 0 | 2.967121  | -0.717435 | 1.854146  |
| 73 | 1  | 0 | 1.806316  | 0.764116  | 0.402773  |
| 74 | 1  | 0 | 2.868099  | 2.841605  | -0.335760 |
| 75 | 1  | 0 | -0.456005 | 5.098207  | 1.182902  |
| 76 | 1  | 0 | -1.533951 | 3.006601  | 1.942769  |
| 77 | 1  | 0 | 3.051270  | 0.687616  | -2.311922 |
| 78 | 1  | 0 | 5.074357  | 2.081839  | -2.207299 |
| 79 | 1  | 0 | 6.829697  | -0.639108 | 0.607391  |
| 80 | 1  | 0 | 4.836785  | -2.045988 | 0.507710  |
| 81 | 1  | 0 | -0.774695 | 0.391956  | -0.962669 |
| 82 | 1  | 0 | -2.530277 | 1.917040  | -1.778596 |
| 83 | 1  | 0 | -4.607263 | -1.399483 | -3.558458 |
| 84 | 1  | 0 | -2.888139 | -2.950309 | -2.634903 |
| 85 | 1  | 0 | -5.388893 | -2.018121 | 3.499664  |
| 86 | 1  | 0 | -7.671912 | -1.284798 | 2.820719  |
| 87 | 1  | 0 | -6.095533 | 0.092765  | -0.936916 |
| 88 | 1  | 0 | -3.830415 | -0.627606 | -0.239804 |

-----  
**RCa<sub>homo</sub>-in/in-exo**  
 -----

| Center<br>Number | Atomic<br>Number | Atomic<br>Type | Coordinates (Angstroms) |           |           |
|------------------|------------------|----------------|-------------------------|-----------|-----------|
|                  |                  |                | X                       | Y         | Z         |
| 1                | 6                | 0              | -0.647735               | 0.225446  | -1.928146 |
| 2                | 7                | 0              | 0.627094                | 0.224163  | -1.942657 |
| 3                | 6                | 0              | -1.394864               | 1.383880  | -2.465500 |
| 4                | 6                | 0              | -2.880103               | 1.073042  | -2.420692 |
| 5                | 7                | 0              | -2.924780               | -0.217315 | -1.718680 |
| 6                | 6                | 0              | -1.688735               | -0.776500 | -1.462004 |
| 7                | 8                | 0              | -1.498798               | -1.873191 | -0.972006 |
| 8                | 6                | 0              | -4.156789               | -0.869665 | -1.471909 |
| 9                | 6                | 0              | -3.684481               | 2.172304  | -1.750570 |
| 10               | 6                | 0              | 1.603519                | -0.685558 | -1.525045 |
| 11               | 6                | 0              | 1.626519                | 3.188448  | -0.073778 |
| 12               | 6                | 0              | 1.690261                | 4.345914  | -0.728155 |
| 13               | 6                | 0              | -0.832410               | 2.511995  | -2.896858 |
| 14               | 6                | 0              | 2.765587                | 2.297327  | 0.202254  |
| 15               | 6                | 0              | 2.208496                | 1.107968  | 0.974194  |
| 16               | 7                | 0              | 0.845723                | 1.305177  | 1.087483  |
| 17               | 6                | 0              | 0.369467                | 2.566543  | 0.497557  |
| 18               | 6                | 0              | -0.334413               | 3.489583  | 1.473129  |
| 19               | 6                | 0              | -0.078013               | 0.339003  | 1.548982  |
| 20               | 8                | 0              | 2.831305                | 0.155251  | 1.398107  |
| 21               | 6                | 0              | -4.046691               | 3.294324  | -2.499473 |
| 22               | 6                | 0              | -4.689563               | 4.369686  | -1.891003 |
| 23               | 6                | 0              | -4.994028               | 4.324630  | -0.531526 |
| 24               | 6                | 0              | -4.665367               | 3.193092  | 0.211440  |
| 25               | 6                | 0              | -4.015437               | 2.122165  | -0.397239 |
| 26               | 6                | 0              | 0.105913                | 3.633328  | 2.788509  |
| 27               | 6                | 0              | -0.536792               | 4.523376  | 3.643873  |
| 28               | 6                | 0              | -1.619682               | 5.276088  | 3.189510  |
| 29               | 6                | 0              | -2.061953               | 5.132397  | 1.876897  |

|    |    |   |           |           |           |
|----|----|---|-----------|-----------|-----------|
| 30 | 6  | 0 | -1.421145 | 4.239159  | 1.020693  |
| 31 | 6  | 0 | -1.451092 | 0.624046  | 1.487046  |
| 32 | 6  | 0 | -2.393430 | -0.313327 | 1.893664  |
| 33 | 6  | 0 | -1.973086 | -1.553422 | 2.351292  |
| 34 | 6  | 0 | -0.620361 | -1.850905 | 2.438892  |
| 35 | 6  | 0 | 0.326273  | -0.908742 | 2.054580  |
| 36 | 6  | 0 | -4.270574 | -1.853367 | -0.480523 |
| 37 | 6  | 0 | -5.501209 | -2.441285 | -0.215775 |
| 38 | 6  | 0 | -6.619329 | -2.059515 | -0.946211 |
| 39 | 6  | 0 | -6.524875 | -1.086485 | -1.932877 |
| 40 | 6  | 0 | -5.296313 | -0.490209 | -2.191117 |
| 41 | 6  | 0 | 1.438527  | -1.858813 | -0.767827 |
| 42 | 6  | 0 | 2.549755  | -2.589664 | -0.359482 |
| 43 | 6  | 0 | 3.823641  | -2.169224 | -0.724848 |
| 44 | 6  | 0 | 4.012853  | -1.041267 | -1.513305 |
| 45 | 6  | 0 | 2.905897  | -0.300992 | -1.893850 |
| 46 | 7  | 0 | 3.932076  | 2.535808  | -0.252952 |
| 47 | 6  | 0 | 5.070035  | 1.723986  | -0.142830 |
| 48 | 6  | 0 | 5.904003  | 1.723563  | -1.270122 |
| 49 | 6  | 0 | 6.999060  | 0.870334  | -1.347731 |
| 50 | 6  | 0 | 7.281055  | 0.046444  | -0.263636 |
| 51 | 6  | 0 | 6.536794  | 0.117372  | 0.910565  |
| 52 | 6  | 0 | 5.440418  | 0.965134  | 0.976264  |
| 53 | 35 | 0 | -8.296532 | -2.863325 | -0.584669 |
| 54 | 35 | 0 | -3.262920 | -2.848187 | 2.848605  |
| 55 | 35 | 0 | 5.355811  | -3.110683 | -0.131034 |
| 56 | 35 | 0 | 8.681819  | -1.217826 | -0.385790 |
| 57 | 1  | 0 | -3.244954 | 0.937202  | -3.447811 |
| 58 | 1  | 0 | 2.642022  | 4.699566  | -1.111560 |
| 59 | 1  | 0 | 0.807845  | 4.959535  | -0.885771 |
| 60 | 1  | 0 | 0.249730  | 2.606980  | -2.876765 |
| 61 | 1  | 0 | -1.417230 | 3.348986  | -3.264053 |
| 62 | 1  | 0 | -0.320350 | 2.329607  | -0.320101 |
| 63 | 1  | 0 | -3.827567 | 3.327132  | -3.564319 |
| 64 | 1  | 0 | -4.961039 | 5.238510  | -2.482150 |
| 65 | 1  | 0 | -5.499286 | 5.160528  | -0.057990 |
| 66 | 1  | 0 | -4.911976 | 3.141040  | 1.267412  |
| 67 | 1  | 0 | -3.778223 | 1.232260  | 0.174975  |
| 68 | 1  | 0 | 0.945054  | 3.040909  | 3.144772  |
| 69 | 1  | 0 | -0.194120 | 4.627930  | 4.668507  |
| 70 | 1  | 0 | -2.120650 | 5.966645  | 3.860501  |
| 71 | 1  | 0 | -2.912890 | 5.703335  | 1.517639  |
| 72 | 1  | 0 | -1.780343 | 4.107662  | 0.000114  |
| 73 | 1  | 0 | -1.804838 | 1.586756  | 1.141172  |
| 74 | 1  | 0 | -3.452989 | -0.080386 | 1.855400  |
| 75 | 1  | 0 | -0.297066 | -2.818446 | 2.806766  |
| 76 | 1  | 0 | 1.374900  | -1.150862 | 2.126430  |
| 77 | 1  | 0 | -3.404309 | -2.160456 | 0.086093  |
| 78 | 1  | 0 | -5.579620 | -3.188318 | 0.566878  |
| 79 | 1  | 0 | -7.402885 | -0.788442 | -2.494374 |
| 80 | 1  | 0 | -5.244190 | 0.280673  | -2.951057 |
| 81 | 1  | 0 | 0.447351  | -2.183312 | -0.484460 |
| 82 | 1  | 0 | 2.422931  | -3.478577 | 0.249151  |
| 83 | 1  | 0 | 5.013627  | -0.739851 | -1.798351 |
| 84 | 1  | 0 | 3.025635  | 0.608621  | -2.475217 |
| 85 | 1  | 0 | 5.645869  | 2.366973  | -2.105139 |
| 86 | 1  | 0 | 7.612986  | 0.832420  | -2.240630 |
| 87 | 1  | 0 | 6.797776  | -0.507285 | 1.757503  |
| 88 | 1  | 0 | 4.854076  | 1.012271  | 1.882482  |

-----  
**TS<sub>homo</sub>**  
 -----

| Center Number | Atomic Number | Atomic Type | Coordinates (Angstroms) |           |           |
|---------------|---------------|-------------|-------------------------|-----------|-----------|
|               |               |             | X                       | Y         | Z         |
| 1             | 6             | 0           | -0.469502               | 1.256668  | -1.421294 |
| 2             | 7             | 0           | 0.816926                | 1.253200  | -1.560933 |
| 3             | 6             | 0           | -1.143931               | 2.453497  | -1.042365 |
| 4             | 6             | 0           | -2.607288               | 2.176628  | -0.830319 |
| 5             | 7             | 0           | -2.723410               | 0.753382  | -1.179154 |
| 6             | 6             | 0           | -1.523888               | 0.177162  | -1.547795 |
| 7             | 8             | 0           | -1.350747               | -0.968642 | -1.920585 |
| 8             | 6             | 0           | -3.936750               | 0.055243  | -0.972904 |
| 9             | 6             | 0           | -3.486463               | 3.079971  | -1.677771 |



|    |    |   |           |           |           |
|----|----|---|-----------|-----------|-----------|
| 10 | 6  | 0 | 1.682950  | 0.182575  | -1.785224 |
| 11 | 6  | 0 | 1.143902  | 2.453272  | 1.042501  |
| 12 | 6  | 0 | 0.468747  | 3.650078  | 0.877255  |
| 13 | 6  | 0 | -0.468769 | 3.650277  | -0.876959 |
| 14 | 6  | 0 | 0.469502  | 1.256393  | 1.421312  |
| 15 | 6  | 0 | 1.523933  | 0.176936  | 1.547862  |
| 16 | 7  | 0 | 2.723457  | 0.753231  | 1.179331  |
| 17 | 6  | 0 | 2.607293  | 2.176484  | 0.830532  |
| 18 | 6  | 0 | 3.486420  | 3.079818  | 1.678042  |
| 19 | 6  | 0 | 3.936783  | 0.055104  | 0.972961  |
| 20 | 8  | 0 | 1.350824  | -0.968892 | 1.920590  |
| 21 | 6  | 0 | -4.032058 | 4.230712  | -1.109458 |
| 22 | 6  | 0 | -4.787897 | 5.107829  | -1.884818 |
| 23 | 6  | 0 | -5.007051 | 4.832175  | -3.231957 |
| 24 | 6  | 0 | -4.466308 | 3.679614  | -3.800930 |
| 25 | 6  | 0 | -3.705105 | 2.807775  | -3.028445 |
| 26 | 6  | 0 | 4.031875  | 4.230680  | 1.109839  |
| 27 | 6  | 0 | 4.787720  | 5.107752  | 1.885243  |
| 28 | 6  | 0 | 5.007025  | 4.831937  | 3.232326  |
| 29 | 6  | 0 | 4.466431  | 3.679256  | 3.801189  |
| 30 | 6  | 0 | 3.705229  | 2.807456  | 3.028656  |
| 31 | 6  | 0 | 5.008491  | 0.711273  | 0.352519  |
| 32 | 6  | 0 | 6.189734  | 0.035793  | 0.070310  |
| 33 | 6  | 0 | 6.310569  | -1.302011 | 0.415189  |
| 34 | 6  | 0 | 5.273472  | -1.962883 | 1.059396  |
| 35 | 6  | 0 | 4.092752  | -1.289604 | 1.346341  |
| 36 | 6  | 0 | -4.092598 | -1.289516 | -1.346153 |
| 37 | 6  | 0 | -5.273325 | -1.962822 | -1.059309 |
| 38 | 6  | 0 | -6.310534 | -1.301939 | -0.415295 |
| 39 | 6  | 0 | -6.189823 | 0.035915  | -0.070565 |
| 40 | 6  | 0 | -5.008582 | 0.711432  | -0.352695 |
| 41 | 6  | 0 | 1.506679  | -1.141197 | -1.343035 |
| 42 | 6  | 0 | 2.518295  | -2.076843 | -1.502785 |
| 43 | 6  | 0 | 3.708910  | -1.708507 | -2.125710 |
| 44 | 6  | 0 | 3.905695  | -0.413228 | -2.588515 |
| 45 | 6  | 0 | 2.902551  | 0.526840  | -2.394067 |
| 46 | 7  | 0 | -0.816940 | 1.252882  | 1.560817  |
| 47 | 6  | 0 | -1.682985 | 0.182266  | 1.785056  |
| 48 | 6  | 0 | -2.902651 | 0.526578  | 2.393741  |
| 49 | 6  | 0 | -3.905810 | -0.413478 | 2.588177  |
| 50 | 6  | 0 | -3.708968 | -1.708796 | 2.125509  |
| 51 | 6  | 0 | -2.518299 | -2.077173 | 1.502710  |
| 52 | 6  | 0 | -1.506677 | -1.141533 | 1.342961  |
| 53 | 35 | 0 | -7.888464 | -2.246366 | 0.027420  |
| 54 | 35 | 0 | 7.888508  | -2.246377 | -0.027599 |
| 55 | 35 | 0 | 5.093731  | -2.981983 | -2.314151 |
| 56 | 35 | 0 | -5.093742 | -2.982304 | 2.314048  |
| 57 | 1  | 0 | -2.857204 | 2.306167  | 0.233659  |
| 58 | 1  | 0 | 1.042308  | 4.562998  | 0.737771  |
| 59 | 1  | 0 | -0.456234 | 3.744322  | 1.439598  |
| 60 | 1  | 0 | 0.456192  | 3.744635  | -1.439314 |
| 61 | 1  | 0 | -1.042333 | 4.563167  | -0.737274 |
| 62 | 1  | 0 | 2.857244  | 2.306073  | -0.233431 |
| 63 | 1  | 0 | -3.870867 | 4.436761  | -0.053212 |
| 64 | 1  | 0 | -5.211401 | 5.999526  | -1.433514 |
| 65 | 1  | 0 | -5.601587 | 5.509657  | -3.836461 |
| 66 | 1  | 0 | -4.638924 | 3.458453  | -4.849466 |
| 67 | 1  | 0 | -3.286405 | 1.907805  | -3.471328 |
| 68 | 1  | 0 | 3.870588  | 4.436864  | 0.053634  |
| 69 | 1  | 0 | 5.211113  | 5.999540  | 1.434015  |
| 70 | 1  | 0 | 5.601558  | 5.509389  | 3.836867  |
| 71 | 1  | 0 | 4.639159  | 3.457963  | 4.849680  |
| 72 | 1  | 0 | 3.286646  | 1.907397  | 3.471466  |
| 73 | 1  | 0 | 4.934499  | 1.751878  | 0.063336  |
| 74 | 1  | 0 | 7.004786  | 0.550587  | -0.425921 |
| 75 | 1  | 0 | 5.377849  | -3.008254 | 1.328471  |
| 76 | 1  | 0 | 3.287964  | -1.812409 | 1.839230  |
| 77 | 1  | 0 | -3.287710 | -1.812333 | -1.838866 |
| 78 | 1  | 0 | -5.377602 | -3.008234 | -1.328264 |
| 79 | 1  | 0 | -7.004970 | 0.550720  | 0.425501  |
| 80 | 1  | 0 | -4.934671 | 1.752070  | -0.063604 |
| 81 | 1  | 0 | 0.579637  | -1.435902 | -0.871924 |
| 82 | 1  | 0 | 2.388829  | -3.089459 | -1.136588 |
| 83 | 1  | 0 | 4.841386  | -0.138492 | -3.062808 |

|    |   |   |           |           |           |
|----|---|---|-----------|-----------|-----------|
| 84 | 1 | 0 | 3.040973  | 1.553254  | -2.720431 |
| 85 | 1 | 0 | -3.041102 | 1.553015  | 2.720021  |
| 86 | 1 | 0 | -4.841542 | -0.138707 | 3.062367  |
| 87 | 1 | 0 | -2.388788 | -3.089823 | 1.136623  |
| 88 | 1 | 0 | -0.579579 | -1.436286 | 0.871990  |

-----  
**TSahetero**  
 -----

| Center<br>Number | Atomic<br>Number | Atomic<br>Type | Coordinates (Angstroms) |           |           |
|------------------|------------------|----------------|-------------------------|-----------|-----------|
|                  |                  |                | X                       | Y         | Z         |
| 1                | 6                | 0              | -0.691233               | 1.126381  | -1.912828 |
| 2                | 7                | 0              | 0.605765                | 1.056043  | -1.916358 |
| 3                | 6                | 0              | -1.332950               | 2.384399  | -1.830727 |
| 4                | 6                | 0              | -2.826334               | 2.203583  | -1.767726 |
| 5                | 7                | 0              | -2.976667               | 0.743105  | -1.801109 |
| 6                | 6                | 0              | -1.772893               | 0.072946  | -1.942862 |
| 7                | 8                | 0              | -1.627531               | -1.125644 | -2.089669 |
| 8                | 6                | 0              | -4.255467               | 0.141580  | -1.850953 |
| 9                | 6                | 0              | -3.449952               | 2.891958  | -0.565955 |
| 10               | 6                | 0              | 1.391731                | -0.100610 | -1.888165 |
| 11               | 6                | 0              | 0.889626                | 2.451123  | 0.370775  |
| 12               | 6                | 0              | 0.094938                | 3.565780  | 0.126261  |
| 13               | 6                | 0              | -0.606083               | 3.556130  | -1.676723 |
| 14               | 6                | 0              | 0.397492                | 1.274079  | 1.026500  |
| 15               | 6                | 0              | 1.597797                | 0.410657  | 1.357669  |
| 16               | 7                | 0              | 2.698659                | 1.041618  | 0.813693  |
| 17               | 6                | 0              | 2.382156                | 2.332900  | 0.182976  |
| 18               | 6                | 0              | 3.149976                | 3.499260  | 0.775631  |
| 19               | 6                | 0              | 3.951022                | 0.421077  | 0.596618  |
| 20               | 8                | 0              | 1.566912                | -0.654947 | 1.939187  |
| 21               | 6                | 0              | -3.778679               | 4.245459  | -0.670584 |
| 22               | 6                | 0              | -4.275073               | 4.935924  | 0.432758  |
| 23               | 6                | 0              | -4.459733               | 4.271289  | 1.643104  |
| 24               | 6                | 0              | -4.153683               | 2.915276  | 1.741963  |
| 25               | 6                | 0              | -3.649326               | 2.226833  | 0.642105  |
| 26               | 6                | 0              | 3.503111                | 4.567473  | -0.049120 |
| 27               | 6                | 0              | 4.150715                | 5.681724  | 0.480927  |
| 28               | 6                | 0              | 4.455567                | 5.726891  | 1.838912  |
| 29               | 6                | 0              | 4.108431                | 4.657736  | 2.664039  |
| 30               | 6                | 0              | 3.453943                | 3.548801  | 2.136142  |
| 31               | 6                | 0              | 4.890319                | 1.034081  | -0.243919 |
| 32               | 6                | 0              | 6.059451                | 0.371159  | -0.598744 |
| 33               | 6                | 0              | 6.304770                | -0.898654 | -0.095634 |
| 34               | 6                | 0              | 5.428916                | -1.483094 | 0.808911  |
| 35               | 6                | 0              | 4.257205                | -0.827397 | 1.160999  |
| 36               | 6                | 0              | -4.429703               | -1.240137 | -1.676736 |
| 37               | 6                | 0              | -5.704771               | -1.793758 | -1.706178 |
| 38               | 6                | 0              | -6.810999               | -0.979195 | -1.906839 |
| 39               | 6                | 0              | -6.658190               | 0.390071  | -2.078134 |
| 40               | 6                | 0              | -5.385928               | 0.946749  | -2.048887 |
| 41               | 6                | 0              | 1.129721                | -1.253371 | -1.127265 |
| 42               | 6                | 0              | 2.064666                | -2.277910 | -1.067657 |
| 43               | 6                | 0              | 3.249864                | -2.173740 | -1.795026 |
| 44               | 6                | 0              | 3.528231                | -1.051239 | -2.563961 |
| 45               | 6                | 0              | 2.608889                | -0.010702 | -2.582817 |
| 46               | 7                | 0              | -0.848452               | 1.008535  | 1.185686  |
| 47               | 6                | 0              | -1.304615               | -0.083068 | 1.945087  |
| 48               | 6                | 0              | -2.176732               | -1.009230 | 1.362908  |
| 49               | 6                | 0              | -2.734006               | -2.035138 | 2.120035  |
| 50               | 6                | 0              | -2.440623               | -2.113639 | 3.474262  |
| 51               | 6                | 0              | -1.594402               | -1.188685 | 4.080805  |
| 52               | 6                | 0              | -1.028524               | -0.179185 | 3.316248  |
| 53               | 35               | 0              | -8.545077               | -1.740347 | -1.946628 |
| 54               | 35               | 0              | 7.823074                | -1.868030 | -0.674191 |
| 55               | 35               | 0              | 4.533647                | -3.560792 | -1.704923 |
| 56               | 35               | 0              | -3.214231               | -3.494481 | 4.519672  |
| 57               | 1                | 0              | -3.270245               | 2.622760  | -2.682663 |
| 58               | 1                | 0              | 0.598072                | 4.524994  | 0.019764  |
| 59               | 1                | 0              | -0.855764               | 3.591926  | 0.655127  |
| 60               | 1                | 0              | 0.374640                | 3.561105  | -2.146730 |
| 61               | 1                | 0              | -1.133900               | 4.506477  | -1.666528 |
| 62               | 1                | 0              | 2.601221                | 2.262113  | -0.893042 |
| 63               | 1                | 0              | -3.654580               | 4.760437  | -1.621191 |

|    |   |   |           |           |           |
|----|---|---|-----------|-----------|-----------|
| 64 | 1 | 0 | -4.526200 | 5.987976  | 0.342417  |
| 65 | 1 | 0 | -4.850909 | 4.805610  | 2.503057  |
| 66 | 1 | 0 | -4.305594 | 2.387135  | 2.678202  |
| 67 | 1 | 0 | -3.411774 | 1.171873  | 0.723429  |
| 68 | 1 | 0 | 3.274640  | 4.522436  | -1.112586 |
| 69 | 1 | 0 | 4.423813  | 6.507584  | -0.168276 |
| 70 | 1 | 0 | 4.966652  | 6.589933  | 2.253429  |
| 71 | 1 | 0 | 4.348797  | 4.687422  | 3.722105  |
| 72 | 1 | 0 | 3.185588  | 2.714318  | 2.778646  |
| 73 | 1 | 0 | 4.713970  | 2.019702  | -0.656463 |
| 74 | 1 | 0 | 6.763200  | 0.837279  | -1.279372 |
| 75 | 1 | 0 | 5.641049  | -2.464979 | 1.216739  |
| 76 | 1 | 0 | 3.567777  | -1.299907 | 1.842733  |
| 77 | 1 | 0 | -3.575171 | -1.885717 | -1.537480 |
| 78 | 1 | 0 | -5.830741 | -2.862361 | -1.572188 |
| 79 | 1 | 0 | -7.524202 | 1.023656  | -2.231969 |
| 80 | 1 | 0 | -5.292263 | 2.018717  | -2.171727 |
| 81 | 1 | 0 | 0.213657  | -1.330806 | -0.551791 |
| 82 | 1 | 0 | 1.879204  | -3.151144 | -0.452137 |
| 83 | 1 | 0 | 4.463393  | -0.978826 | -3.108132 |
| 84 | 1 | 0 | 2.812691  | 0.892600  | -3.149939 |
| 85 | 1 | 0 | -2.402957 | -0.940702 | 0.304133  |
| 86 | 1 | 0 | -3.397889 | -2.757612 | 1.657992  |
| 87 | 1 | 0 | -1.379681 | -1.260510 | 5.141284  |
| 88 | 1 | 0 | -0.367979 | 0.548483  | 3.776955  |

-----  
**TS<sub>homo-in/in</sub>**  
 -----

| Center<br>Number | Atomic<br>Number | Atomic<br>Type | Coordinates (Angstroms) |           |           |
|------------------|------------------|----------------|-------------------------|-----------|-----------|
|                  |                  |                | X                       | Y         | Z         |
| 1                | 6                | 0              | -0.683519               | 1.503547  | -1.236557 |
| 2                | 7                | 0              | 0.594549                | 1.336437  | -1.388112 |
| 3                | 6                | 0              | -1.227238               | 2.692688  | -0.694515 |
| 4                | 6                | 0              | -2.730834               | 2.625624  | -0.692199 |
| 5                | 7                | 0              | -2.997440               | 1.271870  | -1.189405 |
| 6                | 6                | 0              | -1.851427               | 0.609571  | -1.599965 |
| 7                | 8                | 0              | -1.806300               | -0.461197 | -2.171130 |
| 8                | 6                | 0              | -4.317594               | 0.813205  | -1.402818 |
| 9                | 6                | 0              | -3.333539               | 2.957014  | 0.661706  |
| 10               | 6                | 0              | 1.190012                | 0.132417  | -1.780538 |
| 11               | 6                | 0              | 0.907384                | 2.177390  | 1.558281  |
| 12               | 6                | 0              | 0.032514                | 3.272447  | 1.558158  |
| 13               | 6                | 0              | -0.440237               | 3.718446  | -0.156302 |
| 14               | 6                | 0              | 0.487182                | 0.818240  | 1.621271  |
| 15               | 6                | 0              | 1.744932                | -0.032068 | 1.529378  |
| 16               | 7                | 0              | 2.793748                | 0.847553  | 1.356324  |
| 17               | 6                | 0              | 2.416840                | 2.248302  | 1.568416  |
| 18               | 6                | 0              | 2.987077                | 3.242367  | 0.578634  |
| 19               | 6                | 0              | 4.121683                | 0.433676  | 1.107273  |
| 20               | 8                | 0              | 1.823180                | -1.243063 | 1.556479  |
| 21               | 6                | 0              | -3.615561               | 4.293671  | 0.952833  |
| 22               | 6                | 0              | -4.083276               | 4.656519  | 2.213916  |
| 23               | 6                | 0              | -4.286192               | 3.680422  | 3.186541  |
| 24               | 6                | 0              | -4.025202               | 2.343607  | 2.890811  |
| 25               | 6                | 0              | -3.547557               | 1.981379  | 1.634157  |
| 26               | 6                | 0              | 3.140466                | 4.571190  | 0.978719  |
| 27               | 6                | 0              | 3.575894                | 5.534132  | 0.070306  |
| 28               | 6                | 0              | 3.879491                | 5.167845  | -1.238513 |
| 29               | 6                | 0              | 3.752197                | 3.836333  | -1.632204 |
| 30               | 6                | 0              | 3.304841                | 2.877350  | -0.728745 |
| 31               | 6                | 0              | 5.199624                | 1.175733  | 1.592539  |
| 32               | 6                | 0              | 6.502207                | 0.796119  | 1.283378  |
| 33               | 6                | 0              | 6.717289                | -0.323337 | 0.488719  |
| 34               | 6                | 0              | 5.652472                | -1.068935 | -0.006026 |
| 35               | 6                | 0              | 4.354274                | -0.688136 | 0.304639  |
| 36               | 6                | 0              | -4.593211               | -0.542464 | -1.637575 |
| 37               | 6                | 0              | -5.904977               | -0.969368 | -1.809978 |
| 38               | 6                | 0              | -6.946132               | -0.052616 | -1.747895 |
| 39               | 6                | 0              | -6.691957               | 1.292339  | -1.514739 |
| 40               | 6                | 0              | -5.382212               | 1.722171  | -1.342276 |
| 41               | 6                | 0              | 0.846793                | -1.124635 | -1.259633 |
| 42               | 6                | 0              | 1.616607                | -2.243574 | -1.553392 |
| 43               | 6                | 0              | 2.722368                | -2.111646 | -2.386495 |

|    |    |   |           |           |           |
|----|----|---|-----------|-----------|-----------|
| 44 | 6  | 0 | 3.054407  | -0.889160 | -2.963077 |
| 45 | 6  | 0 | 2.293520  | 0.226288  | -2.647017 |
| 46 | 7  | 0 | -0.757461 | 0.460659  | 1.645189  |
| 47 | 6  | 0 | -1.167053 | -0.857663 | 1.884426  |
| 48 | 6  | 0 | -2.223589 | -1.384784 | 1.128124  |
| 49 | 6  | 0 | -2.731861 | -2.652726 | 1.388663  |
| 50 | 6  | 0 | -2.206246 | -3.387487 | 2.442364  |
| 51 | 6  | 0 | -1.180860 | -2.874237 | 3.233775  |
| 52 | 6  | 0 | -0.664246 | -1.618989 | 2.952761  |
| 53 | 35 | 0 | -8.731954 | -0.641086 | -1.978456 |
| 54 | 35 | 0 | 8.491908  | -0.833213 | 0.059403  |
| 55 | 35 | 0 | 3.873574  | -3.592408 | -2.646781 |
| 56 | 35 | 0 | -2.905331 | -5.107069 | 2.824252  |
| 57 | 1  | 0 | -3.111658 | 3.352071  | -1.426665 |
| 58 | 1  | 0 | 0.468609  | 4.231414  | 1.834866  |
| 59 | 1  | 0 | -0.948402 | 3.084230  | 1.991577  |
| 60 | 1  | 0 | 0.550684  | 3.817724  | -0.597677 |
| 61 | 1  | 0 | -0.944379 | 4.661370  | 0.048508  |
| 62 | 1  | 0 | 2.735470  | 2.557240  | 2.577312  |
| 63 | 1  | 0 | -3.476885 | 5.054247  | 0.186902  |
| 64 | 1  | 0 | -4.298062 | 5.698149  | 2.430395  |
| 65 | 1  | 0 | -4.655810 | 3.958698  | 4.168329  |
| 66 | 1  | 0 | -4.191574 | 1.576421  | 3.640381  |
| 67 | 1  | 0 | -3.337396 | 0.941350  | 1.412547  |
| 68 | 1  | 0 | 2.926848  | 4.854077  | 2.007422  |
| 69 | 1  | 0 | 3.688730  | 6.565189  | 0.389936  |
| 70 | 1  | 0 | 4.226431  | 5.914102  | -1.946135 |
| 71 | 1  | 0 | 4.005096  | 3.542371  | -2.646572 |
| 72 | 1  | 0 | 3.208508  | 1.840084  | -1.027152 |
| 73 | 1  | 0 | 5.031509  | 2.057411  | 2.202779  |
| 74 | 1  | 0 | 7.342058  | 1.370728  | 1.656988  |
| 75 | 1  | 0 | 5.821505  | -1.930389 | -0.644238 |
| 76 | 1  | 0 | 3.519112  | -1.256759 | -0.082895 |
| 77 | 1  | 0 | -3.788423 | -1.260554 | -1.703876 |
| 78 | 1  | 0 | -6.110969 | -2.018292 | -1.991737 |
| 79 | 1  | 0 | -7.507962 | 2.004307  | -1.465194 |
| 80 | 1  | 0 | -5.206334 | 2.773512  | -1.149494 |
| 81 | 1  | 0 | 0.005637  | -1.221344 | -0.581730 |
| 82 | 1  | 0 | 1.379427  | -3.201948 | -1.105246 |
| 83 | 1  | 0 | 3.914886  | -0.807727 | -3.617543 |
| 84 | 1  | 0 | 2.543518  | 1.196463  | -3.065676 |
| 85 | 1  | 0 | -2.641883 | -0.799967 | 0.317230  |
| 86 | 1  | 0 | -3.537775 | -3.055004 | 0.784602  |
| 87 | 1  | 0 | -0.790242 | -3.454809 | 4.062178  |
| 88 | 1  | 0 | 0.130719  | -1.212994 | 3.568539  |

-----  
**TS<sub>homo</sub>-EXO**  
 -----

| Center Number | Atomic Number | Atomic Type | Coordinates (Angstroms) |           |           |
|---------------|---------------|-------------|-------------------------|-----------|-----------|
|               |               |             | X                       | Y         | Z         |
| 1             | 6             | 0           | -1.101846               | -1.261027 | 0.471851  |
| 2             | 7             | 0           | 0.195240                | -1.149631 | 0.600453  |
| 3             | 6             | 0           | -1.637137               | -2.168943 | -0.464586 |
| 4             | 6             | 0           | -3.117912               | -1.956510 | -0.604308 |
| 5             | 7             | 0           | -3.413106               | -1.056536 | 0.513778  |
| 6             | 6             | 0           | -2.283738               | -0.600661 | 1.161152  |
| 7             | 8             | 0           | -2.275193               | 0.160026  | 2.111620  |
| 8             | 6             | 0           | -4.721043               | -0.580495 | 0.749833  |
| 9             | 6             | 0           | -3.919965               | -3.241374 | -0.575538 |
| 10            | 6             | 0           | 0.929467                | -0.253440 | 1.368607  |
| 11            | 6             | 0           | 0.738184                | -1.200630 | -2.371557 |
| 12            | 6             | 0           | -0.170920               | -2.222582 | -2.699932 |
| 13            | 6             | 0           | -0.846841               | -3.024532 | -1.250246 |
| 14            | 6             | 0           | 2.022116                | -1.434429 | -1.793889 |
| 15            | 6             | 0           | 2.620746                | -0.070522 | -1.501591 |
| 16            | 7             | 0           | 1.665605                | 0.862856  | -1.861674 |
| 17            | 6             | 0           | 0.551427                | 0.278230  | -2.616165 |
| 18            | 6             | 0           | -0.834236               | 0.798335  | -2.285998 |
| 19            | 6             | 0           | 1.854107                | 2.255593  | -1.715357 |
| 20            | 8             | 0           | 3.708648                | 0.170832  | -1.020581 |
| 21            | 6             | 0           | -4.399646               | -3.783160 | -1.766549 |
| 22            | 6             | 0           | -5.085941               | -4.996629 | -1.760242 |
| 23            | 6             | 0           | -5.300909               | -5.666340 | -0.559174 |

|    |    |   |           |           |           |
|----|----|---|-----------|-----------|-----------|
| 24 | 6  | 0 | -4.825129 | -5.123307 | 0.634705  |
| 25 | 6  | 0 | -4.132705 | -3.917369 | 0.627009  |
| 26 | 6  | 0 | -1.846439 | 0.638227  | -3.237003 |
| 27 | 6  | 0 | -3.151875 | 1.036039  | -2.954953 |
| 28 | 6  | 0 | -3.452594 | 1.616560  | -1.723682 |
| 29 | 6  | 0 | -2.438603 | 1.810988  | -0.787320 |
| 30 | 6  | 0 | -1.136115 | 1.403105  | -1.067421 |
| 31 | 6  | 0 | 1.291310  | 3.147910  | -2.630745 |
| 32 | 6  | 0 | 1.433512  | 4.519789  | -2.447572 |
| 33 | 6  | 0 | 2.137609  | 4.992940  | -1.347219 |
| 34 | 6  | 0 | 2.698268  | 4.116880  | -0.424347 |
| 35 | 6  | 0 | 2.556241  | 2.748275  | -0.609036 |
| 36 | 6  | 0 | -5.103363 | -0.090137 | 2.004844  |
| 37 | 6  | 0 | -6.398181 | 0.374650  | 2.206856  |
| 38 | 6  | 0 | -7.315696 | 0.340105  | 1.164701  |
| 39 | 6  | 0 | -6.957890 | -0.157974 | -0.081659 |
| 40 | 6  | 0 | -5.662554 | -0.616341 | -0.286559 |
| 41 | 6  | 0 | 0.500784  | 0.985193  | 1.896707  |
| 42 | 6  | 0 | 1.404345  | 1.846476  | 2.498288  |
| 43 | 6  | 0 | 2.744640  | 1.479515  | 2.600136  |
| 44 | 6  | 0 | 3.190451  | 0.242539  | 2.150027  |
| 45 | 6  | 0 | 2.283048  | -0.607988 | 1.534559  |
| 46 | 7  | 0 | 2.445758  | -2.615404 | -1.492230 |
| 47 | 6  | 0 | 3.704496  | -2.900204 | -0.956363 |
| 48 | 6  | 0 | 3.756973  | -3.845973 | 0.078855  |
| 49 | 6  | 0 | 4.971065  | -4.230711 | 0.633872  |
| 50 | 6  | 0 | 6.147115  | -3.703074 | 0.113520  |
| 51 | 6  | 0 | 6.125158  | -2.798447 | -0.944413 |
| 52 | 6  | 0 | 4.907322  | -2.395093 | -1.473174 |
| 53 | 35 | 0 | -9.080204 | 0.971111  | 1.446982  |
| 54 | 35 | 0 | 2.328950  | 6.861797  | -1.095082 |
| 55 | 35 | 0 | 3.992175  | 2.743249  | 3.249753  |
| 56 | 35 | 0 | 7.812660  | -4.237983 | 0.844993  |
| 57 | 1  | 0 | -3.306901 | -1.430542 | -1.555238 |
| 58 | 1  | 0 | 0.317782  | -3.124161 | -3.068240 |
| 59 | 1  | 0 | -1.037965 | -1.932202 | -3.290233 |
| 60 | 1  | 0 | 0.097149  | -3.312539 | -0.782304 |
| 61 | 1  | 0 | -1.386663 | -3.844917 | -1.722122 |
| 62 | 1  | 0 | 0.719202  | 0.459715  | -3.691482 |
| 63 | 1  | 0 | -4.240712 | -3.250734 | -2.702384 |
| 64 | 1  | 0 | -5.458306 | -5.411433 | -2.691535 |
| 65 | 1  | 0 | -5.841007 | -6.607687 | -0.550468 |
| 66 | 1  | 0 | -4.993774 | -5.641788 | 1.573194  |
| 67 | 1  | 0 | -3.761221 | -3.490776 | 1.555432  |
| 68 | 1  | 0 | -1.611151 | 0.210230  | -4.208992 |
| 69 | 1  | 0 | -3.929254 | 0.902751  | -3.701111 |
| 70 | 1  | 0 | -4.468103 | 1.926843  | -1.498388 |
| 71 | 1  | 0 | -2.664274 | 2.262992  | 0.174374  |
| 72 | 1  | 0 | -0.342806 | 1.564731  | -0.345156 |
| 73 | 1  | 0 | 0.731027  | 2.782036  | -3.485051 |
| 74 | 1  | 0 | 0.996271  | 5.213441  | -3.156703 |
| 75 | 1  | 0 | 3.232139  | 4.488868  | 0.444058  |
| 76 | 1  | 0 | 2.987792  | 2.063339  | 0.108363  |
| 77 | 1  | 0 | -4.392181 | -0.068934 | 2.817777  |
| 78 | 1  | 0 | -6.691110 | 0.755152  | 3.178975  |
| 79 | 1  | 0 | -7.681254 | -0.188207 | -0.888523 |
| 80 | 1  | 0 | -5.393840 | -0.998763 | -1.264657 |
| 81 | 1  | 0 | -0.537072 | 1.276978  | 1.827131  |
| 82 | 1  | 0 | 1.077557  | 2.813790  | 2.863610  |
| 83 | 1  | 0 | 4.236597  | -0.030577 | 2.228521  |
| 84 | 1  | 0 | 2.616016  | -1.559925 | 1.132707  |
| 85 | 1  | 0 | 2.825131  | -4.259376 | 0.452815  |
| 86 | 1  | 0 | 5.004553  | -4.942903 | 1.450730  |
| 87 | 1  | 0 | 7.053748  | -2.409935 | -1.347614 |
| 88 | 1  | 0 | 4.882544  | -1.688163 | -2.294211 |

-----  
**TS<sub>hetero</sub>-exo**  
 -----

| Center Number | Atomic Number | Atomic Type | Coordinates (Angstroms) |           |           |
|---------------|---------------|-------------|-------------------------|-----------|-----------|
|               |               |             | X                       | Y         | Z         |
| 1             | 6             | 0           | 3.778291                | -2.325481 | -0.564548 |
| 2             | 6             | 0           | 3.500903                | -2.451636 | -1.934052 |
| 3             | 6             | 0           | 4.321024                | -3.265182 | -2.726073 |

|    |    |   |           |           |           |
|----|----|---|-----------|-----------|-----------|
| 4  | 6  | 0 | 5.435587  | -3.890665 | -2.181664 |
| 5  | 6  | 0 | 5.700058  | -3.737164 | -0.825157 |
| 6  | 6  | 0 | 4.873409  | -2.969612 | -0.008519 |
| 7  | 7  | 0 | 2.351749  | -1.911663 | -2.523161 |
| 8  | 6  | 0 | 1.938916  | -0.711724 | -2.293488 |
| 9  | 6  | 0 | 0.643386  | -0.247439 | -2.675126 |
| 10 | 6  | 0 | 0.539986  | 1.234034  | -2.422817 |
| 11 | 7  | 0 | 1.772545  | 1.524918  | -1.674883 |
| 12 | 6  | 0 | 2.656649  | 0.458661  | -1.649673 |
| 13 | 6  | 0 | -0.324432 | -1.063132 | -3.287538 |
| 14 | 8  | 0 | 3.800113  | 0.486951  | -1.245198 |
| 15 | 6  | 0 | 2.121948  | 2.842840  | -1.295909 |
| 16 | 6  | 0 | 1.493395  | 3.936453  | -1.901969 |
| 17 | 6  | 0 | 1.804310  | 5.234316  | -1.514459 |
| 18 | 6  | 0 | 2.750212  | 5.442611  | -0.519673 |
| 19 | 6  | 0 | 3.387737  | 4.369885  | 0.090693  |
| 20 | 6  | 0 | 3.074619  | 3.071520  | -0.293295 |
| 21 | 6  | 0 | -0.736136 | 1.761328  | -1.788598 |
| 22 | 6  | 0 | -1.657954 | 2.430340  | -2.597591 |
| 23 | 6  | 0 | -2.809611 | 2.990336  | -2.048732 |
| 24 | 6  | 0 | -3.059134 | 2.869695  | -0.683468 |
| 25 | 6  | 0 | -2.147188 | 2.194717  | 0.127037  |
| 26 | 6  | 0 | -0.987921 | 1.649746  | -0.421294 |
| 27 | 35 | 0 | 3.174395  | 7.210853  | 0.011404  |
| 28 | 35 | 0 | 7.203699  | -4.608355 | -0.067834 |
| 29 | 7  | 0 | 0.327907  | -1.297759 | 0.118368  |
| 30 | 6  | 0 | 0.838775  | -0.948650 | 1.382077  |
| 31 | 6  | 0 | 1.714738  | 0.133337  | 1.529185  |
| 32 | 6  | 0 | 2.314236  | 0.406474  | 2.754200  |
| 33 | 6  | 0 | 2.063732  | -0.428262 | 3.834751  |
| 34 | 6  | 0 | 1.214039  | -1.524273 | 3.710355  |
| 35 | 6  | 0 | 0.604208  | -1.777957 | 2.491590  |
| 36 | 35 | 0 | 2.896541  | -0.078342 | 5.501019  |
| 37 | 6  | 0 | -0.946980 | -1.536122 | -0.023148 |
| 38 | 6  | 0 | -1.506208 | -2.140866 | -1.163682 |
| 39 | 6  | 0 | -3.002804 | -2.224288 | -1.026550 |
| 40 | 7  | 0 | -3.252751 | -1.502435 | 0.227187  |
| 41 | 6  | 0 | -2.095925 | -1.113038 | 0.873069  |
| 42 | 6  | 0 | -0.752580 | -2.500262 | -2.289776 |
| 43 | 6  | 0 | -3.712209 | -1.637376 | -2.230589 |
| 44 | 6  | 0 | -4.186063 | -2.484311 | -3.231375 |
| 45 | 6  | 0 | -4.755186 | -1.952893 | -4.387609 |
| 46 | 6  | 0 | -4.858076 | -0.572883 | -4.539882 |
| 47 | 6  | 0 | -4.388512 | 0.274001  | -3.535584 |
| 48 | 6  | 0 | -3.812052 | -0.254781 | -2.384922 |
| 49 | 6  | 0 | -4.564936 | -1.284275 | 0.701823  |
| 50 | 6  | 0 | -4.850929 | -0.255058 | 1.608337  |
| 51 | 6  | 0 | -6.155776 | -0.050697 | 2.041331  |
| 52 | 6  | 0 | -7.177559 | -0.863126 | 1.566364  |
| 53 | 6  | 0 | -6.912643 | -1.882242 | 0.660961  |
| 54 | 6  | 0 | -5.608062 | -2.091228 | 0.231432  |
| 55 | 8  | 0 | -2.018050 | -0.498506 | 1.918811  |
| 56 | 35 | 0 | -8.955958 | -0.571933 | 2.152829  |
| 57 | 1  | 0 | -3.302382 | -3.276504 | -0.913296 |
| 58 | 1  | 0 | 0.100248  | -1.697216 | -4.067995 |
| 59 | 1  | 0 | -1.259309 | -0.581576 | -3.574708 |
| 60 | 1  | 0 | 0.272766  | -2.821592 | -2.082444 |
| 61 | 1  | 0 | -1.273504 | -3.111962 | -3.025545 |
| 62 | 1  | 0 | 0.621556  | 1.715063  | -3.411973 |
| 63 | 1  | 0 | -4.113372 | -3.562392 | -3.104811 |
| 64 | 1  | 0 | -5.123428 | -2.617371 | -5.162724 |
| 65 | 1  | 0 | -5.307180 | -0.156537 | -5.435955 |
| 66 | 1  | 0 | -4.470149 | 1.350598  | -3.647735 |
| 67 | 1  | 0 | -3.441262 | 0.401511  | -1.600573 |
| 68 | 1  | 0 | -1.461786 | 2.534951  | -3.662880 |
| 69 | 1  | 0 | -3.505716 | 3.526339  | -2.686642 |
| 70 | 1  | 0 | -3.955248 | 3.303820  | -0.251489 |
| 71 | 1  | 0 | -2.323042 | 2.095899  | 1.193401  |
| 72 | 1  | 0 | -0.270674 | 1.160301  | 0.228515  |
| 73 | 1  | 0 | 0.752035  | 3.791384  | -2.678342 |
| 74 | 1  | 0 | 1.311525  | 6.076138  | -1.987290 |
| 75 | 1  | 0 | 4.125174  | 4.542010  | 0.866547  |
| 76 | 1  | 0 | 3.586689  | 2.241177  | 0.173497  |
| 77 | 1  | 0 | -4.056638 | 0.376731  | 1.978321  |

|    |   |   |           |           |           |
|----|---|---|-----------|-----------|-----------|
| 78 | 1 | 0 | -6.374346 | 0.746040  | 2.743490  |
| 79 | 1 | 0 | -7.715331 | -2.510132 | 0.291237  |
| 80 | 1 | 0 | -5.415761 | -2.887148 | -0.478668 |
| 81 | 1 | 0 | 1.901191  | 0.788709  | 0.687304  |
| 82 | 1 | 0 | 2.974465  | 1.260263  | 2.861776  |
| 83 | 1 | 0 | 1.032109  | -2.172480 | 4.560388  |
| 84 | 1 | 0 | -0.050910 | -2.636613 | 2.382171  |
| 85 | 1 | 0 | 4.079977  | -3.387492 | -3.777010 |
| 86 | 1 | 0 | 6.083729  | -4.502350 | -2.799124 |
| 87 | 1 | 0 | 5.085798  | -2.877062 | 1.050828  |
| 88 | 1 | 0 | 3.118749  | -1.733304 | 0.061930  |

-----  
**TS<sub>hetero-exo'</sub>**  
 -----

| Center<br>Number | Atomic<br>Number | Atomic<br>Type | Coordinates (Angstroms) |           |           |
|------------------|------------------|----------------|-------------------------|-----------|-----------|
|                  |                  |                | X                       | Y         | Z         |
| 1                | 6                | 0              | 0.490742                | -1.738569 | -1.293722 |
| 2                | 7                | 0              | -0.792420               | -1.522288 | -1.355132 |
| 3                | 6                | 0              | 0.957634                | -2.888690 | -0.618019 |
| 4                | 6                | 0              | 2.450647                | -2.829033 | -0.452533 |
| 5                | 7                | 0              | 2.788546                | -1.520993 | -1.029474 |
| 6                | 6                | 0              | 1.709054                | -0.910591 | -1.652198 |
| 7                | 8                | 0              | 1.751108                | 0.098029  | -2.329273 |
| 8                | 6                | 0              | 4.072497                | -0.953273 | -0.861152 |
| 9                | 6                | 0              | 3.147362                | -3.995626 | -1.137100 |
| 10               | 6                | 0              | -1.514921               | -0.410779 | -1.772236 |
| 11               | 6                | 0              | -0.917034               | -1.666743 | 1.457455  |
| 12               | 6                | 0              | -0.597693               | -3.017793 | 1.604191  |
| 13               | 6                | 0              | 0.073392                | -3.774170 | 0.004030  |
| 14               | 6                | 0              | -2.212185               | -1.068752 | 1.244575  |
| 15               | 6                | 0              | -1.963029               | 0.436542  | 1.146985  |
| 16               | 7                | 0              | -0.602664               | 0.627437  | 1.286818  |
| 17               | 6                | 0              | 0.132597                | -0.609416 | 1.554687  |
| 18               | 6                | 0              | 0.888373                | -0.581973 | 2.871586  |
| 19               | 6                | 0              | 0.079551                | 1.845634  | 1.067053  |
| 20               | 8                | 0              | -2.780887               | 1.319085  | 0.975770  |
| 21               | 6                | 0              | 3.514152                | -5.110287 | -0.383557 |
| 22               | 6                | 0              | 4.095405                | -6.214931 | -1.002911 |
| 23               | 6                | 0              | 4.316865                | -6.204944 | -2.377524 |
| 24               | 6                | 0              | 3.954198                | -5.089061 | -3.130877 |
| 25               | 6                | 0              | 3.367689                | -3.988032 | -2.514488 |
| 26               | 6                | 0              | 0.209200                | -0.344326 | 4.068190  |
| 27               | 6                | 0              | 0.900974                | -0.341581 | 5.273853  |
| 28               | 6                | 0              | 2.276239                | -0.580269 | 5.293451  |
| 29               | 6                | 0              | 2.957553                | -0.816008 | 4.103579  |
| 30               | 6                | 0              | 2.262717                | -0.813245 | 2.894795  |
| 31               | 6                | 0              | 1.442198                | 1.819423  | 0.736625  |
| 32               | 6                | 0              | 2.134670                | 2.995716  | 0.478510  |
| 33               | 6                | 0              | 1.466108                | 4.210245  | 0.550974  |
| 34               | 6                | 0              | 0.118856                | 4.258105  | 0.886320  |
| 35               | 6                | 0              | -0.574992               | 3.082298  | 1.148974  |
| 36               | 6                | 0              | 4.374576                | 0.344575  | -1.305913 |
| 37               | 6                | 0              | 5.625981                | 0.895384  | -1.055138 |
| 38               | 6                | 0              | 6.586240                | 0.162257  | -0.369762 |
| 39               | 6                | 0              | 6.308021                | -1.124359 | 0.069706  |
| 40               | 6                | 0              | 5.057007                | -1.678929 | -0.174100 |
| 41               | 6                | 0              | -1.059100               | 0.918044  | -1.880796 |
| 42               | 6                | 0              | -1.956963               | 1.948750  | -2.120671 |
| 43               | 6                | 0              | -3.310155               | 1.661709  | -2.278856 |
| 44               | 6                | 0              | -3.784868               | 0.356557  | -2.220382 |
| 45               | 6                | 0              | -2.888262               | -0.664833 | -1.948458 |
| 46               | 7                | 0              | -3.273486               | -1.791389 | 1.178763  |
| 47               | 6                | 0              | -4.619710               | -1.488507 | 0.987483  |
| 48               | 6                | 0              | -5.467983               | -2.599812 | 1.161267  |
| 49               | 6                | 0              | -6.841845               | -2.503516 | 1.002720  |
| 50               | 6                | 0              | -7.386584               | -1.274519 | 0.644691  |
| 51               | 6                | 0              | -6.578506               | -0.158380 | 0.450834  |
| 52               | 6                | 0              | -5.203927               | -0.258014 | 0.625419  |
| 53               | 35               | 0              | 8.288177                | 0.921484  | -0.035585 |
| 54               | 35               | 0              | 2.403842                | 5.817189  | 0.194958  |
| 55               | 35               | 0              | -4.542095               | 3.077597  | -2.519762 |
| 56               | 35               | 0              | -9.258903               | -1.118491 | 0.410778  |
| 57               | 1                | 0              | 2.710908                | -2.838388 | 0.616510  |

|    |   |   |           |           |           |
|----|---|---|-----------|-----------|-----------|
| 58 | 1 | 0 | -1.442005 | -3.686475 | 1.754676  |
| 59 | 1 | 0 | 0.269410  | -3.230335 | 2.227458  |
| 60 | 1 | 0 | -0.892737 | -3.858957 | -0.488106 |
| 61 | 1 | 0 | 0.477765  | -4.702508 | 0.401998  |
| 62 | 1 | 0 | 0.873351  | -0.799498 | 0.761789  |
| 63 | 1 | 0 | 3.352381  | -5.112022 | 0.692558  |
| 64 | 1 | 0 | 4.381324  | -7.077524 | -0.409517 |
| 65 | 1 | 0 | 4.775143  | -7.061706 | -2.860957 |
| 66 | 1 | 0 | 4.129107  | -5.075323 | -4.201906 |
| 67 | 1 | 0 | 3.088854  | -3.117881 | -3.103196 |
| 68 | 1 | 0 | -0.862551 | -0.160097 | 4.051369  |
| 69 | 1 | 0 | 0.368428  | -0.154563 | 6.200813  |
| 70 | 1 | 0 | 2.813847  | -0.576719 | 6.236196  |
| 71 | 1 | 0 | 4.028540  | -0.991404 | 4.109766  |
| 72 | 1 | 0 | 2.801800  | -0.972200 | 1.960920  |
| 73 | 1 | 0 | 1.989589  | 0.885905  | 0.669331  |
| 74 | 1 | 0 | 3.187640  | 2.958601  | 0.221075  |
| 75 | 1 | 0 | -0.393615 | 5.211645  | 0.948247  |
| 76 | 1 | 0 | -1.622739 | 3.124470  | 1.405844  |
| 77 | 1 | 0 | 3.639128  | 0.921149  | -1.846658 |
| 78 | 1 | 0 | 5.849330  | 1.899048  | -1.399944 |
| 79 | 1 | 0 | 7.059994  | -1.698053 | 0.599577  |
| 80 | 1 | 0 | 4.868997  | -2.688642 | 0.169304  |
| 81 | 1 | 0 | -0.011553 | 1.150735  | -1.744192 |
| 82 | 1 | 0 | -1.609485 | 2.975326  | -2.161801 |
| 83 | 1 | 0 | -4.842226 | 0.149366  | -2.342741 |
| 84 | 1 | 0 | -3.234358 | -1.688141 | -1.843448 |
| 85 | 1 | 0 | -5.011713 | -3.547529 | 1.426921  |
| 86 | 1 | 0 | -7.481286 | -3.367081 | 1.146433  |
| 87 | 1 | 0 | -7.021002 | 0.789409  | 0.163311  |
| 88 | 1 | 0 | -4.584019 | 0.613214  | 0.470620  |

-----

**TS<sub>homo-in/in-exo</sub>**

-----

| Center<br>Number | Atomic<br>Number | Atomic<br>Type | Coordinates (Angstroms) |           |           |
|------------------|------------------|----------------|-------------------------|-----------|-----------|
|                  |                  |                | X                       | Y         | Z         |
| 1                | 6                | 0              | -0.406410               | 0.358695  | -1.894146 |
| 2                | 7                | 0              | 0.896499                | 0.294359  | -1.924801 |
| 3                | 6                | 0              | -1.029653               | 1.568985  | -2.276818 |
| 4                | 6                | 0              | -2.533780               | 1.415584  | -2.217137 |
| 5                | 7                | 0              | -2.693546               | 0.054096  | -1.690039 |
| 6                | 6                | 0              | -1.495393               | -0.612036 | -1.499097 |
| 7                | 8                | 0              | -1.377927               | -1.760621 | -1.117147 |
| 8                | 6                | 0              | -3.964583               | -0.554198 | -1.558018 |
| 9                | 6                | 0              | -3.270930               | 2.473663  | -1.409107 |
| 10               | 6                | 0              | 1.802045                | -0.698617 | -1.589087 |
| 11               | 6                | 0              | 1.029331                | 2.596802  | -0.251400 |
| 12               | 6                | 0              | 0.721711                | 3.506213  | -1.270327 |
| 13               | 6                | 0              | -0.242740               | 2.677635  | -2.650107 |
| 14               | 6                | 0              | 2.268252                | 1.947220  | 0.095552  |
| 15               | 6                | 0              | 1.873883                | 0.807587  | 1.052020  |
| 16               | 7                | 0              | 0.515575                | 0.928351  | 1.275307  |
| 17               | 6                | 0              | -0.045229               | 2.127686  | 0.665115  |
| 18               | 6                | 0              | -0.446056               | 3.201904  | 1.672150  |
| 19               | 6                | 0              | -0.350321               | -0.069897 | 1.770789  |
| 20               | 8                | 0              | 2.578760                | -0.073948 | 1.496994  |
| 21               | 6                | 0              | -3.419480               | 3.751520  | -1.955784 |
| 22               | 6                | 0              | -4.076437               | 4.753299  | -1.243902 |
| 23               | 6                | 0              | -4.614316               | 4.480262  | 0.012843  |
| 24               | 6                | 0              | -4.484968               | 3.203817  | 0.554411  |
| 25               | 6                | 0              | -3.814170               | 2.206519  | -0.150256 |
| 26               | 6                | 0              | 0.157712                | 3.266320  | 2.928442  |
| 27               | 6                | 0              | -0.189220               | 4.279859  | 3.817945  |
| 28               | 6                | 0              | -1.137741               | 5.235865  | 3.459251  |
| 29               | 6                | 0              | -1.741632               | 5.172054  | 2.205963  |
| 30               | 6                | 0              | -1.397743               | 4.157950  | 1.315822  |
| 31               | 6                | 0              | -1.705386               | 0.251911  | 1.938164  |
| 32               | 6                | 0              | -2.639181               | -0.736073 | 2.221156  |
| 33               | 6                | 0              | -2.216496               | -2.051331 | 2.354322  |
| 34               | 6                | 0              | -0.867273               | -2.374059 | 2.284251  |
| 35               | 6                | 0              | 0.071323                | -1.385502 | 2.009745  |
| 36               | 6                | 0              | -4.163637               | -1.627578 | -0.678116 |
| 37               | 6                | 0              | -5.430494               | -2.176488 | -0.520669 |



|    |    |   |           |           |           |
|----|----|---|-----------|-----------|-----------|
| 38 | 6  | 0 | -6.500221 | -1.661835 | -1.242161 |
| 39 | 6  | 0 | -6.321728 | -0.596504 | -2.115202 |
| 40 | 6  | 0 | -5.055976 | -0.042709 | -2.268892 |
| 41 | 6  | 0 | 1.588353  | -1.874575 | -0.839111 |
| 42 | 6  | 0 | 2.668592  | -2.641552 | -0.421895 |
| 43 | 6  | 0 | 3.963511  | -2.257432 | -0.767205 |
| 44 | 6  | 0 | 4.195761  | -1.163963 | -1.589724 |
| 45 | 6  | 0 | 3.118133  | -0.391101 | -1.985226 |
| 46 | 7  | 0 | 3.394771  | 2.284622  | -0.428051 |
| 47 | 6  | 0 | 4.648617  | 1.704321  | -0.225370 |
| 48 | 6  | 0 | 5.541397  | 1.855690  | -1.301065 |
| 49 | 6  | 0 | 6.752509  | 1.177456  | -1.332351 |
| 50 | 6  | 0 | 7.091144  | 0.366184  | -0.253107 |
| 51 | 6  | 0 | 6.290020  | 0.309381  | 0.882758  |
| 52 | 6  | 0 | 5.082368  | 0.993216  | 0.905936  |
| 53 | 35 | 0 | -8.226321 | -2.413016 | -1.023296 |
| 54 | 35 | 0 | -3.510117 | -3.416599 | 2.575011  |
| 55 | 35 | 0 | 5.465479  | -3.185450 | -0.084703 |
| 56 | 35 | 0 | 8.633853  | -0.723581 | -0.345199 |
| 57 | 1  | 0 | -2.917894 | 1.448364  | -3.247929 |
| 58 | 1  | 0 | 1.569100  | 3.917669  | -1.813135 |
| 59 | 1  | 0 | -0.040035 | 4.242850  | -1.017754 |
| 60 | 1  | 0 | 0.658827  | 2.373151  | -3.178166 |
| 61 | 1  | 0 | -0.751224 | 3.534892  | -3.083343 |
| 62 | 1  | 0 | -0.930063 | 1.855474  | 0.059194  |
| 63 | 1  | 0 | -3.039973 | 3.960849  | -2.952999 |
| 64 | 1  | 0 | -4.181761 | 5.741563  | -1.680039 |
| 65 | 1  | 0 | -5.137760 | 5.256203  | 0.562381  |
| 66 | 1  | 0 | -4.905762 | 2.979160  | 1.529511  |
| 67 | 1  | 0 | -3.729065 | 1.211259  | 0.273794  |
| 68 | 1  | 0 | 0.890472  | 2.518246  | 3.217244  |
| 69 | 1  | 0 | 0.282002  | 4.319735  | 4.794914  |
| 70 | 1  | 0 | -1.408448 | 6.022634  | 4.156127  |
| 71 | 1  | 0 | -2.490424 | 5.903871  | 1.917919  |
| 72 | 1  | 0 | -1.884224 | 4.105203  | 0.344867  |
| 73 | 1  | 0 | -2.045427 | 1.276584  | 1.842559  |
| 74 | 1  | 0 | -3.690717 | -0.484889 | 2.315906  |
| 75 | 1  | 0 | -0.545373 | -3.400827 | 2.418896  |
| 76 | 1  | 0 | 1.118464  | -1.641499 | 1.936071  |
| 77 | 1  | 0 | -3.336361 | -2.034039 | -0.114449 |
| 78 | 1  | 0 | -5.574135 | -2.995569 | 0.175883  |
| 79 | 1  | 0 | -7.162162 | -0.196018 | -2.670678 |
| 80 | 1  | 0 | -4.935289 | 0.798690  | -2.941808 |
| 81 | 1  | 0 | 0.582453  | -2.154735 | -0.554749 |
| 82 | 1  | 0 | 2.509071  | -3.518086 | 0.197391  |
| 83 | 1  | 0 | 5.208636  | -0.897500 | -1.869204 |
| 84 | 1  | 0 | 3.271242  | 0.504641  | -2.578235 |
| 85 | 1  | 0 | 5.230334  | 2.465536  | -2.143377 |
| 86 | 1  | 0 | 7.408872  | 1.249168  | -2.192600 |
| 87 | 1  | 0 | 6.594401  | -0.291312 | 1.732655  |
| 88 | 1  | 0 | 4.460386  | 0.935041  | 1.785825  |

-----  
**5a<sub>homo</sub>**  
 -----

| Center Number | Atomic Number | Atomic Type | Coordinates (Angstroms) |           |           |
|---------------|---------------|-------------|-------------------------|-----------|-----------|
|               |               |             | X                       | Y         | Z         |
| 1             | 6             | 0           | -0.400219               | 1.443511  | -1.278816 |
| 2             | 7             | 0           | 0.928380                | 1.378254  | -0.878953 |
| 3             | 6             | 0           | -1.193497               | 2.471211  | -0.950258 |
| 4             | 6             | 0           | -2.635247               | 2.068039  | -1.062800 |
| 5             | 7             | 0           | -2.562092               | 0.693650  | -1.563228 |
| 6             | 6             | 0           | -1.239333               | 0.271616  | -1.659304 |
| 7             | 8             | 0           | -0.855430               | -0.851011 | -1.932210 |
| 8             | 6             | 0           | -3.655682               | -0.188821 | -1.419424 |
| 9             | 6             | 0           | -3.474904               | 2.990202  | -1.921932 |
| 10            | 6             | 0           | 1.939532                | 0.584851  | -1.505620 |
| 11            | 6             | 0           | 1.158128                | 2.115306  | 0.415892  |
| 12            | 6             | 0           | 0.719600                | 3.569630  | 0.255129  |
| 13            | 6             | 0           | -0.735761               | 3.707372  | -0.254757 |
| 14            | 6             | 0           | 0.380934                | 1.246999  | 1.386206  |
| 15            | 6             | 0           | 1.316754                | 0.118368  | 1.779969  |
| 16            | 7             | 0           | 2.584245                | 0.530218  | 1.422778  |
| 17            | 6             | 0           | 2.608285                | 1.902879  | 0.888474  |

|    |    |   |           |           |           |
|----|----|---|-----------|-----------|-----------|
| 18 | 6  | 0 | 3.077905  | 2.921648  | 1.906807  |
| 19 | 6  | 0 | 3.727555  | -0.296730 | 1.329742  |
| 20 | 8  | 0 | 1.006461  | -0.920106 | 2.330536  |
| 21 | 6  | 0 | -4.303775 | 3.936826  | -1.322211 |
| 22 | 6  | 0 | -5.036409 | 4.827043  | -2.105747 |
| 23 | 6  | 0 | -4.944798 | 4.768620  | -3.493416 |
| 24 | 6  | 0 | -4.116749 | 3.821063  | -4.096155 |
| 25 | 6  | 0 | -3.381148 | 2.937583  | -3.313688 |
| 26 | 6  | 0 | 3.824262  | 4.018505  | 1.470772  |
| 27 | 6  | 0 | 4.227057  | 5.001201  | 2.370764  |
| 28 | 6  | 0 | 3.888826  | 4.890654  | 3.717678  |
| 29 | 6  | 0 | 3.151297  | 3.794128  | 4.159283  |
| 30 | 6  | 0 | 2.747915  | 2.811668  | 3.258527  |
| 31 | 6  | 0 | 4.937448  | 0.259138  | 0.891578  |
| 32 | 6  | 0 | 6.022445  | -0.554680 | 0.589503  |
| 33 | 6  | 0 | 5.912335  | -1.928532 | 0.752135  |
| 34 | 6  | 0 | 4.747180  | -2.489140 | 1.259853  |
| 35 | 6  | 0 | 3.656793  | -1.679530 | 1.555407  |
| 36 | 6  | 0 | -3.610064 | -1.494040 | -1.929343 |
| 37 | 6  | 0 | -4.646304 | -2.383846 | -1.667156 |
| 38 | 6  | 0 | -5.740713 | -1.972607 | -0.918024 |
| 39 | 6  | 0 | -5.829395 | -0.667149 | -0.454041 |
| 40 | 6  | 0 | -4.792773 | 0.221710  | -0.708886 |
| 41 | 6  | 0 | 2.026553  | -0.792268 | -1.290643 |
| 42 | 6  | 0 | 3.128867  | -1.508579 | -1.743479 |
| 43 | 6  | 0 | 4.151824  | -0.834782 | -2.400145 |
| 44 | 6  | 0 | 4.059128  | 0.523341  | -2.684009 |
| 45 | 6  | 0 | 2.940992  | 1.225260  | -2.242278 |
| 46 | 7  | 0 | -0.850677 | 1.427653  | 1.628843  |
| 47 | 6  | 0 | -1.780386 | 0.456296  | 2.042245  |
| 48 | 6  | 0 | -2.821245 | 0.848929  | 2.892388  |
| 49 | 6  | 0 | -3.902739 | 0.005681  | 3.119224  |
| 50 | 6  | 0 | -3.960411 | -1.216928 | 2.457522  |
| 51 | 6  | 0 | -2.939554 | -1.625018 | 1.606646  |
| 52 | 6  | 0 | -1.847022 | -0.791414 | 1.406937  |
| 53 | 35 | 0 | -7.124660 | -3.201911 | -0.520338 |
| 54 | 35 | 0 | 7.360141  | -3.044045 | 0.265623  |
| 55 | 35 | 0 | 5.731062  | -1.778079 | -2.843581 |
| 56 | 35 | 0 | -5.488468 | -2.318284 | 2.648228  |
| 57 | 1  | 0 | -3.032786 | 2.056561  | -0.035764 |
| 58 | 1  | 0 | 1.416026  | 4.035439  | -0.451769 |
| 59 | 1  | 0 | 0.827799  | 4.092245  | 1.209048  |
| 60 | 1  | 0 | -0.816500 | 4.578057  | -0.916298 |
| 61 | 1  | 0 | -1.411116 | 3.889422  | 0.587876  |
| 62 | 1  | 0 | 3.273056  | 1.937233  | 0.025051  |
| 63 | 1  | 0 | -4.379917 | 3.973978  | -0.237406 |
| 64 | 1  | 0 | -5.682458 | 5.558789  | -1.631079 |
| 65 | 1  | 0 | -5.519408 | 5.456197  | -4.105923 |
| 66 | 1  | 0 | -4.045100 | 3.771481  | -5.178132 |
| 67 | 1  | 0 | -2.734755 | 2.196827  | -3.777318 |
| 68 | 1  | 0 | 4.091548  | 4.102010  | 0.419252  |
| 69 | 1  | 0 | 4.809623  | 5.847534  | 2.021200  |
| 70 | 1  | 0 | 4.205086  | 5.652738  | 4.422695  |
| 71 | 1  | 0 | 2.892458  | 3.698895  | 5.208922  |
| 72 | 1  | 0 | 2.186461  | 1.953093  | 3.616923  |
| 73 | 1  | 0 | 5.050344  | 1.330477  | 0.774952  |
| 74 | 1  | 0 | 6.943513  | -0.118673 | 0.219157  |
| 75 | 1  | 0 | 4.678484  | -3.561240 | 1.407712  |
| 76 | 1  | 0 | 2.744498  | -2.124639 | 1.924389  |
| 77 | 1  | 0 | -2.756146 | -1.821004 | -2.503515 |
| 78 | 1  | 0 | -4.596111 | -3.398635 | -2.046261 |
| 79 | 1  | 0 | -6.690970 | -0.347926 | 0.121848  |
| 80 | 1  | 0 | -4.882776 | 1.233287  | -0.332358 |
| 81 | 1  | 0 | 1.247416  | -1.296027 | -0.728652 |
| 82 | 1  | 0 | 3.218144  | -2.569420 | -1.538435 |
| 83 | 1  | 0 | 4.857149  | 1.028233  | -3.216538 |
| 84 | 1  | 0 | 2.857719  | 2.292766  | -2.427524 |
| 85 | 1  | 0 | -2.782648 | 1.829355  | 3.356493  |
| 86 | 1  | 0 | -4.710947 | 0.309731  | 3.775025  |
| 87 | 1  | 0 | -3.013583 | -2.569651 | 1.078601  |
| 88 | 1  | 0 | -1.064898 | -1.086739 | 0.714257  |

| Center<br>Number | Atomic<br>Number | Atomic<br>Type | Coordinates (Angstroms) |           |           |
|------------------|------------------|----------------|-------------------------|-----------|-----------|
|                  |                  |                | X                       | Y         | Z         |
| 1                | 6                | 0              | -0.415230               | 0.975769  | -1.851767 |
| 2                | 7                | 0              | 0.905177                | 1.055695  | -1.389124 |
| 3                | 6                | 0              | -1.060150               | 2.116060  | -2.122033 |
| 4                | 6                | 0              | -2.520387               | 1.863550  | -2.383577 |
| 5                | 7                | 0              | -2.626147               | 0.427400  | -2.092755 |
| 6                | 6                | 0              | -1.406209               | -0.136182 | -1.756094 |
| 7                | 8                | 0              | -1.232745               | -1.293983 | -1.416852 |
| 8                | 6                | 0              | -3.871267               | -0.208797 | -1.878384 |
| 9                | 6                | 0              | -3.432460               | 2.737028  | -1.546720 |
| 10               | 6                | 0              | 1.888327                | 0.049790  | -1.653881 |
| 11               | 6                | 0              | 0.997576                | 1.961977  | -0.174819 |
| 12               | 6                | 0              | 0.254282                | 3.291976  | -0.440310 |
| 13               | 6                | 0              | -0.339546               | 3.393022  | -1.868962 |
| 14               | 6                | 0              | 0.403622                | 1.096470  | 0.928022  |
| 15               | 6                | 0              | 1.544783                | 0.284572  | 1.515084  |
| 16               | 7                | 0              | 2.701357                | 0.838144  | 1.021816  |
| 17               | 6                | 0              | 2.473314                | 2.087084  | 0.276372  |
| 18               | 6                | 0              | 2.772312                | 3.310640  | 1.122365  |
| 19               | 6                | 0              | 3.976977                | 0.230259  | 1.043792  |
| 20               | 8                | 0              | 1.449843                | -0.653735 | 2.283217  |
| 21               | 6                | 0              | -4.050175               | 3.844075  | -2.125851 |
| 22               | 6                | 0              | -4.850607               | 4.685863  | -1.354671 |
| 23               | 6                | 0              | -5.044690               | 4.414779  | -0.003289 |
| 24               | 6                | 0              | -4.431992               | 3.303438  | 0.576206  |
| 25               | 6                | 0              | -3.623772               | 2.470723  | -0.190087 |
| 26               | 6                | 0              | 3.442587                | 4.392740  | 0.548176  |
| 27               | 6                | 0              | 3.694211                | 5.543977  | 1.290202  |
| 28               | 6                | 0              | 3.277957                | 5.619902  | 2.617172  |
| 29               | 6                | 0              | 2.614130                | 4.540929  | 3.197477  |
| 30               | 6                | 0              | 2.364451                | 3.389881  | 2.455110  |
| 31               | 6                | 0              | 5.094564                | 0.967210  | 0.634380  |
| 32               | 6                | 0              | 6.325523                | 0.344199  | 0.461391  |
| 33               | 6                | 0              | 6.443076                | -1.014448 | 0.717607  |
| 34               | 6                | 0              | 5.360861                | -1.745617 | 1.191908  |
| 35               | 6                | 0              | 4.129804                | -1.127321 | 1.361929  |
| 36               | 6                | 0              | -4.063965               | -1.008029 | -0.746926 |
| 37               | 6                | 0              | -5.306698               | -1.570173 | -0.486775 |
| 38               | 6                | 0              | -6.358946               | -1.320255 | -1.361644 |
| 39               | 6                | 0              | -6.187773               | -0.520606 | -2.485165 |
| 40               | 6                | 0              | -4.937695               | 0.034332  | -2.743546 |
| 41               | 6                | 0              | 1.771886                | -1.271791 | -1.208266 |
| 42               | 6                | 0              | 2.818551                | -2.169373 | -1.388985 |
| 43               | 6                | 0              | 3.991520                | -1.739408 | -2.002334 |
| 44               | 6                | 0              | 4.109354                | -0.450082 | -2.502314 |
| 45               | 6                | 0              | 3.044298                | 0.432463  | -2.340910 |
| 46               | 7                | 0              | -0.841864               | 1.054143  | 1.152276  |
| 47               | 6                | 0              | -1.566906               | 0.067717  | 1.845419  |
| 48               | 6                | 0              | -1.336745               | -1.304938 | 1.683334  |
| 49               | 6                | 0              | -2.262752               | -2.230368 | 2.149541  |
| 50               | 6                | 0              | -3.415986               | -1.782024 | 2.785252  |
| 51               | 6                | 0              | -3.641739               | -0.426927 | 3.003432  |
| 52               | 6                | 0              | -2.718197               | 0.491919  | 2.522275  |
| 53               | 35               | 0              | -8.063779               | -2.069866 | -1.003631 |
| 54               | 35               | 0              | 8.083654                | -1.895278 | 0.386555  |
| 55               | 35               | 0              | 5.469528                | -2.916041 | -2.114761 |
| 56               | 35               | 0              | -4.739585               | -3.037135 | 3.295408  |
| 57               | 1                | 0              | -2.738021               | 2.047915  | -3.445803 |
| 58               | 1                | 0              | 0.919328                | 4.140177  | -0.265209 |
| 59               | 1                | 0              | -0.569704               | 3.363255  | 0.276116  |
| 60               | 1                | 0              | 0.477058                | 3.505791  | -2.591802 |
| 61               | 1                | 0              | -0.990754               | 4.267545  | -1.941654 |
| 62               | 1                | 0              | 3.121698                | 2.097709  | -0.601897 |
| 63               | 1                | 0              | -3.908647               | 4.047303  | -3.184773 |
| 64               | 1                | 0              | -5.329563               | 5.544955  | -1.813721 |
| 65               | 1                | 0              | -5.676273               | 5.062267  | 0.596712  |
| 66               | 1                | 0              | -4.591709               | 3.083271  | 1.627763  |
| 67               | 1                | 0              | -3.141410               | 1.605630  | 0.254071  |
| 68               | 1                | 0              | 3.767378                | 4.333088  | -0.488754 |
| 69               | 1                | 0              | 4.219074                | 6.376796  | 0.833317  |
| 70               | 1                | 0              | 3.475264                | 6.514132  | 3.199528  |
| 71               | 1                | 0              | 2.293521                | 4.591787  | 4.233009  |

|    |   |   |           |           |           |
|----|---|---|-----------|-----------|-----------|
| 72 | 1 | 0 | 1.859565  | 2.550347  | 2.926100  |
| 73 | 1 | 0 | 5.014959  | 2.029990  | 0.435794  |
| 74 | 1 | 0 | 7.181621  | 0.914059  | 0.118461  |
| 75 | 1 | 0 | 5.468490  | -2.804490 | 1.399725  |
| 76 | 1 | 0 | 3.284031  | -1.704403 | 1.707014  |
| 77 | 1 | 0 | -3.240295 | -1.180190 | -0.064853 |
| 78 | 1 | 0 | -5.453875 | -2.170604 | 0.406164  |
| 79 | 1 | 0 | -7.020646 | -0.331659 | -3.152914 |
| 80 | 1 | 0 | -4.796341 | 0.661936  | -3.618112 |
| 81 | 1 | 0 | 0.857193  | -1.591672 | -0.723092 |
| 82 | 1 | 0 | 2.738708  | -3.186527 | -1.021061 |
| 83 | 1 | 0 | 5.020173  | -0.136008 | -2.999749 |
| 84 | 1 | 0 | 3.110335  | 1.441204  | -2.737844 |
| 85 | 1 | 0 | -0.460007 | -1.645064 | 1.148612  |
| 86 | 1 | 0 | -2.105224 | -3.291190 | 1.990041  |
| 87 | 1 | 0 | -4.543430 | -0.095759 | 3.505995  |
| 88 | 1 | 0 | -2.893063 | 1.557614  | 2.636601  |

-----  
**5a<sub>homo-in/in</sub>**  
 -----

| Center<br>Number | Atomic<br>Number | Atomic<br>Type | Coordinates (Angstroms) |           |           |
|------------------|------------------|----------------|-------------------------|-----------|-----------|
|                  |                  |                | X                       | Y         | Z         |
| 1                | 6                | 0              | -1.716701               | -0.384549 | -0.475086 |
| 2                | 7                | 0              | -0.450115               | -0.143158 | 0.041754  |
| 3                | 6                | 0              | -2.025845               | -0.569551 | -1.766179 |
| 4                | 6                | 0              | -3.518533               | -0.617062 | -1.948294 |
| 5                | 7                | 0              | -4.013119               | -0.461815 | -0.579580 |
| 6                | 6                | 0              | -2.978150               | -0.255330 | 0.320528  |
| 7                | 8                | 0              | -3.080382               | -0.000846 | 1.504485  |
| 8                | 6                | 0              | -5.389675               | -0.470922 | -0.276685 |
| 9                | 6                | 0              | -3.996894               | 0.483834  | -2.880459 |
| 10               | 6                | 0              | -0.144197               | -0.589003 | 1.361077  |
| 11               | 6                | 0              | 0.624933                | 0.100237  | -0.931644 |
| 12               | 6                | 0              | 0.041330                | 0.534624  | -2.297757 |
| 13               | 6                | 0              | -1.002710               | -0.442974 | -2.843094 |
| 14               | 6                | 0              | 1.531739                | 1.249568  | -0.512699 |
| 15               | 6                | 0              | 2.972641                | 0.796469  | -0.576111 |
| 16               | 7                | 0              | 2.961383                | -0.513106 | -0.987633 |
| 17               | 6                | 0              | 1.625111                | -1.099962 | -1.174989 |
| 18               | 6                | 0              | 1.429197                | -2.362451 | -0.356732 |
| 19               | 6                | 0              | 4.128561                | -1.260378 | -1.294483 |
| 20               | 8                | 0              | 3.943492                | 1.476654  | -0.309635 |
| 21               | 6                | 0              | -4.420440               | 0.175847  | -4.171612 |
| 22               | 6                | 0              | -4.797574               | 1.191863  | -5.049198 |
| 23               | 6                | 0              | -4.754000               | 2.519610  | -4.634754 |
| 24               | 6                | 0              | -4.328965               | 2.830775  | -3.342619 |
| 25               | 6                | 0              | -3.947123               | 1.817594  | -2.470123 |
| 26               | 6                | 0              | 0.459841                | -3.279024 | -0.764694 |
| 27               | 6                | 0              | 0.236773                | -4.443414 | -0.032871 |
| 28               | 6                | 0              | 0.989834                | -4.702483 | 1.109190  |
| 29               | 6                | 0              | 1.969277                | -3.796070 | 1.512787  |
| 30               | 6                | 0              | 2.192103                | -2.635099 | 0.780401  |
| 31               | 6                | 0              | 4.030458                | -2.378653 | -2.131850 |
| 32               | 6                | 0              | 5.157504                | -3.126204 | -2.448398 |
| 33               | 6                | 0              | 6.389598                | -2.761870 | -1.921474 |
| 34               | 6                | 0              | 6.503019                | -1.666705 | -1.075454 |
| 35               | 6                | 0              | 5.376237                | -0.917213 | -0.756807 |
| 36               | 6                | 0              | -5.880060               | -0.029542 | 0.961420  |
| 37               | 6                | 0              | -7.245530               | -0.053925 | 1.220922  |
| 38               | 6                | 0              | -8.129981               | -0.508105 | 0.251662  |
| 39               | 6                | 0              | -7.663874               | -0.942005 | -0.981773 |
| 40               | 6                | 0              | -6.299412               | -0.924607 | -1.242193 |
| 41               | 6                | 0              | 0.808170                | 0.054675  | 2.156465  |
| 42               | 6                | 0              | 1.171881                | -0.473930 | 3.393889  |
| 43               | 6                | 0              | 0.556661                | -1.627174 | 3.852298  |
| 44               | 6                | 0              | -0.440299               | -2.247607 | 3.105660  |
| 45               | 6                | 0              | -0.777590               | -1.732411 | 1.866222  |
| 46               | 7                | 0              | 1.059106                | 2.379605  | -0.205557 |
| 47               | 6                | 0              | 1.838973                | 3.512349  | 0.111365  |
| 48               | 6                | 0              | 1.605712                | 4.134913  | 1.339631  |
| 49               | 6                | 0              | 2.292787                | 5.295687  | 1.679069  |
| 50               | 6                | 0              | 3.174642                | 5.851722  | 0.760730  |
| 51               | 6                | 0              | 3.386417                | 5.266293  | -0.484099 |

|    |    |   |           |           |           |
|----|----|---|-----------|-----------|-----------|
| 52 | 6  | 0 | 2.720429  | 4.091654  | -0.805721 |
| 53 | 35 | 0 | -9.991310 | -0.530348 | 0.611981  |
| 54 | 35 | 0 | 7.927999  | -3.779493 | -2.350609 |
| 55 | 35 | 0 | 1.100890  | -2.393951 | 5.498411  |
| 56 | 35 | 0 | 4.096185  | 7.448899  | 1.202341  |
| 57 | 1  | 0 | -3.822129 | -1.593146 | -2.350531 |
| 58 | 1  | 0 | 0.879439  | 0.662192  | -2.991249 |
| 59 | 1  | 0 | -0.428340 | 1.513612  | -2.157767 |
| 60 | 1  | 0 | -0.553560 | -1.408714 | -3.111256 |
| 61 | 1  | 0 | -1.448946 | -0.039555 | -3.758047 |
| 62 | 1  | 0 | 1.521032  | -1.379229 | -2.230558 |
| 63 | 1  | 0 | -4.459521 | -0.863210 | -4.492127 |
| 64 | 1  | 0 | -5.129875 | 0.943031  | -6.052067 |
| 65 | 1  | 0 | -5.051747 | 3.311788  | -5.314260 |
| 66 | 1  | 0 | -4.294355 | 3.865007  | -3.015294 |
| 67 | 1  | 0 | -3.614763 | 2.059308  | -1.463016 |
| 68 | 1  | 0 | -0.130785 | -3.082762 | -1.657253 |
| 69 | 1  | 0 | -0.522310 | -5.147824 | -0.358523 |
| 70 | 1  | 0 | 0.816412  | -5.607842 | 1.682382  |
| 71 | 1  | 0 | 2.550807  | -3.983762 | 2.410483  |
| 72 | 1  | 0 | 2.952296  | -1.930601 | 1.105071  |
| 73 | 1  | 0 | 3.076782  | -2.691534 | -2.538878 |
| 74 | 1  | 0 | 5.072346  | -3.989407 | -3.098477 |
| 75 | 1  | 0 | 7.466186  | -1.397439 | -0.656786 |
| 76 | 1  | 0 | 5.469033  | -0.069225 | -0.094978 |
| 77 | 1  | 0 | -5.197309 | 0.328997  | 1.716959  |
| 78 | 1  | 0 | -7.617183 | 0.288489  | 2.180382  |
| 79 | 1  | 0 | -8.356889 | -1.292945 | -1.738021 |
| 80 | 1  | 0 | -5.956435 | -1.265014 | -2.211619 |
| 81 | 1  | 0 | 1.275122  | 0.976598  | 1.839871  |
| 82 | 1  | 0 | 1.929004  | 0.019630  | 3.992887  |
| 83 | 1  | 0 | -0.915873 | -3.151596 | 3.469808  |
| 84 | 1  | 0 | -1.503810 | -2.258652 | 1.256442  |
| 85 | 1  | 0 | 0.886361  | 3.701029  | 2.027105  |
| 86 | 1  | 0 | 2.130079  | 5.771225  | 2.639706  |
| 87 | 1  | 0 | 4.071401  | 5.720823  | -1.190968 |
| 88 | 1  | 0 | 2.882501  | 3.617897  | -1.768243 |

-----  
**5a<sub>homo</sub>-exo**  
 -----

| Center<br>Number | Atomic<br>Number | Atomic<br>Type | Coordinates (Angstroms) |           |           |
|------------------|------------------|----------------|-------------------------|-----------|-----------|
|                  |                  |                | X                       | Y         | Z         |
| 1                | 6                | 0              | 1.405378                | -0.624122 | 0.630511  |
| 2                | 7                | 0              | 0.057336                | -0.460831 | 0.323535  |
| 3                | 6                | 0              | 1.965301                | -0.572319 | 1.841686  |
| 4                | 6                | 0              | 3.464817                | -0.567512 | 1.709441  |
| 5                | 7                | 0              | 3.664256                | -0.648943 | 0.259395  |
| 6                | 6                | 0              | 2.455403                | -0.641742 | -0.422384 |
| 7                | 8                | 0              | 2.280919                | -0.628597 | -1.625699 |
| 8                | 6                | 0              | 4.940293                | -0.555003 | -0.325407 |
| 9                | 6                | 0              | 4.101442                | -1.711554 | 2.475827  |
| 10               | 6                | 0              | -0.519068               | -1.421261 | -0.566044 |
| 11               | 6                | 0              | -0.738406               | 0.031972  | 1.480505  |
| 12               | 6                | 0              | -0.303498               | -0.653201 | 2.787384  |
| 13               | 6                | 0              | 1.185216                | -0.460958 | 3.104388  |
| 14               | 6                | 0              | -2.211131               | -0.212585 | 1.201853  |
| 15               | 6                | 0              | -2.774286               | 1.022185  | 0.528208  |
| 16               | 7                | 0              | -1.825754               | 2.001237  | 0.685459  |
| 17               | 6                | 0              | -0.682522               | 1.603352  | 1.529809  |
| 18               | 6                | 0              | 0.617709                | 2.226343  | 1.074903  |
| 19               | 6                | 0              | -2.040545               | 3.344238  | 0.288307  |
| 20               | 8                | 0              | -3.833735               | 1.111443  | -0.057210 |
| 21               | 6                | 0              | 4.691955                | -1.475646 | 3.716050  |
| 22               | 6                | 0              | 5.219608                | -2.533010 | 4.455651  |
| 23               | 6                | 0              | 5.161236                | -3.829884 | 3.953345  |
| 24               | 6                | 0              | 4.570303                | -4.068386 | 2.712253  |
| 25               | 6                | 0              | 4.037459                | -3.014009 | 1.978251  |
| 26               | 6                | 0              | 1.510865                | 2.726959  | 2.022389  |
| 27               | 6                | 0              | 2.776255                | 3.167875  | 1.639426  |
| 28               | 6                | 0              | 3.148373                | 3.126861  | 0.297556  |
| 29               | 6                | 0              | 2.236898                | 2.683276  | -0.660516 |
| 30               | 6                | 0              | 0.973217                | 2.246598  | -0.276219 |
| 31               | 6                | 0              | -1.611568               | 4.390989  | 1.107634  |

|    |    |   |           |           |           |
|----|----|---|-----------|-----------|-----------|
| 32 | 6  | 0 | -1.809982 | 5.710125  | 0.718423  |
| 33 | 6  | 0 | -2.444255 | 5.974389  | -0.489412 |
| 34 | 6  | 0 | -2.877145 | 4.943013  | -1.314457 |
| 35 | 6  | 0 | -2.670264 | 3.624202  | -0.927340 |
| 36 | 6  | 0 | 5.143390  | -0.834158 | -1.685280 |
| 37 | 6  | 0 | 6.415031  | -0.734713 | -2.236586 |
| 38 | 6  | 0 | 7.490882  | -0.367235 | -1.438337 |
| 39 | 6  | 0 | 7.310864  | -0.098184 | -0.088666 |
| 40 | 6  | 0 | 6.039298  | -0.190669 | 0.464321  |
| 41 | 6  | 0 | -1.403866 | -0.990073 | -1.555376 |
| 42 | 6  | 0 | -2.082362 | -1.912303 | -2.341926 |
| 43 | 6  | 0 | -1.840838 | -3.268798 | -2.147760 |
| 44 | 6  | 0 | -0.916272 | -3.715287 | -1.210696 |
| 45 | 6  | 0 | -0.258423 | -2.782397 | -0.414501 |
| 46 | 7  | 0 | -2.776739 | -1.311190 | 1.460189  |
| 47 | 6  | 0 | -4.137191 | -1.557117 | 1.166763  |
| 48 | 6  | 0 | -4.431380 | -2.591975 | 0.275940  |
| 49 | 6  | 0 | -5.753942 | -2.909676 | -0.009928 |
| 50 | 6  | 0 | -6.772327 | -2.216982 | 0.634623  |
| 51 | 6  | 0 | -6.492817 | -1.208388 | 1.550724  |
| 52 | 6  | 0 | -5.169586 | -0.875341 | 1.812928  |
| 53 | 35 | 0 | 9.224096  | -0.236396 | -2.197208 |
| 54 | 35 | 0 | -2.716753 | 7.772209  | -1.021735 |
| 55 | 35 | 0 | -2.858398 | -4.534591 | -3.121394 |
| 56 | 35 | 0 | -8.578426 | -2.666049 | 0.268521  |
| 57 | 1  | 0 | 3.856581  | 0.391061  | 2.081023  |
| 58 | 1  | 0 | -0.525219 | -1.718322 | 2.664107  |
| 59 | 1  | 0 | -0.926691 | -0.290777 | 3.610119  |
| 60 | 1  | 0 | 1.512856  | -1.216563 | 3.828357  |
| 61 | 1  | 0 | 1.371322  | 0.513955  | 3.573337  |
| 62 | 1  | 0 | -0.875716 | 1.903464  | 2.570060  |
| 63 | 1  | 0 | 4.742636  | -0.459937 | 4.103110  |
| 64 | 1  | 0 | 5.680763  | -2.340697 | 5.419242  |
| 65 | 1  | 0 | 5.577135  | -4.653751 | 4.524525  |
| 66 | 1  | 0 | 4.525169  | -5.078146 | 2.316595  |
| 67 | 1  | 0 | 3.577189  | -3.194880 | 1.009629  |
| 68 | 1  | 0 | 1.220920  | 2.760969  | 3.070588  |
| 69 | 1  | 0 | 3.466902  | 3.543910  | 2.387921  |
| 70 | 1  | 0 | 4.138051  | 3.454978  | -0.004362 |
| 71 | 1  | 0 | 2.515577  | 2.661174  | -1.709162 |
| 72 | 1  | 0 | 0.274977  | 1.879299  | -1.022256 |
| 73 | 1  | 0 | -1.119146 | 4.184177  | 2.051708  |
| 74 | 1  | 0 | -1.476014 | 6.524287  | 1.351223  |
| 75 | 1  | 0 | -3.364397 | 5.165176  | -2.256990 |
| 76 | 1  | 0 | -3.000071 | 2.814069  | -1.565263 |
| 77 | 1  | 0 | 4.307966  | -1.120158 | -2.307427 |
| 78 | 1  | 0 | 6.565395  | -0.949304 | -3.288854 |
| 79 | 1  | 0 | 8.154260  | 0.183120  | 0.531764  |
| 80 | 1  | 0 | 5.918788  | 0.017545  | 1.520677  |
| 81 | 1  | 0 | -1.573644 | 0.073651  | -1.696449 |
| 82 | 1  | 0 | -2.797875 | -1.584878 | -3.087509 |
| 83 | 1  | 0 | -0.739339 | -4.777016 | -1.080483 |
| 84 | 1  | 0 | 0.438022  | -3.113505 | 0.351244  |
| 85 | 1  | 0 | -3.622295 | -3.131701 | -0.205962 |
| 86 | 1  | 0 | -5.986397 | -3.695676 | -0.720010 |
| 87 | 1  | 0 | -7.300654 | -0.683536 | 2.048263  |
| 88 | 1  | 0 | -4.933505 | -0.085068 | 2.518410  |

5a<sub>hetero</sub>-EXO

| Center Number | Atomic Number | Atomic Type | Coordinates (Angstroms) |           |          |
|---------------|---------------|-------------|-------------------------|-----------|----------|
|               |               |             | X                       | Y         | Z        |
| 1             | 6             | 0           | -4.146744               | -2.110903 | 0.420478 |
| 2             | 6             | 0           | -3.699052               | -1.914274 | 1.730928 |
| 3             | 6             | 0           | -4.463791               | -2.375645 | 2.803372 |
| 4             | 6             | 0           | -5.693396               | -2.983765 | 2.573420 |
| 5             | 6             | 0           | -6.124068               | -3.169665 | 1.264796 |
| 6             | 6             | 0           | -5.356775               | -2.747356 | 0.183257 |
| 7             | 7             | 0           | -2.404215               | -1.408837 | 1.981076 |
| 8             | 6             | 0           | -1.984354               | -0.311811 | 1.514681 |
| 9             | 6             | 0           | -0.530113               | 0.107684  | 1.605732 |
| 10            | 6             | 0           | -0.657461               | 1.664526  | 1.578887 |
| 11            | 7             | 0           | -1.849833               | 1.867960  | 0.736744 |

|    |    |   |           |           |           |
|----|----|---|-----------|-----------|-----------|
| 12 | 6  | 0 | -2.733707 | 0.810295  | 0.808388  |
| 13 | 6  | 0 | 0.177052  | -0.306797 | 2.916976  |
| 14 | 8  | 0 | -3.878415 | 0.796425  | 0.408898  |
| 15 | 6  | 0 | -2.226643 | 3.128916  | 0.216142  |
| 16 | 6  | 0 | -1.829650 | 4.307035  | 0.852736  |
| 17 | 6  | 0 | -2.184098 | 5.542177  | 0.322206  |
| 18 | 6  | 0 | -2.942954 | 5.591663  | -0.840355 |
| 19 | 6  | 0 | -3.350560 | 4.427693  | -1.482179 |
| 20 | 6  | 0 | -2.988700 | 3.194404  | -0.954900 |
| 21 | 6  | 0 | 0.596685  | 2.389405  | 1.154007  |
| 22 | 6  | 0 | 1.306289  | 3.106469  | 2.122309  |
| 23 | 6  | 0 | 2.493252  | 3.760568  | 1.800821  |
| 24 | 6  | 0 | 2.995022  | 3.688342  | 0.503792  |
| 25 | 6  | 0 | 2.294401  | 2.974626  | -0.468171 |
| 26 | 6  | 0 | 1.095972  | 2.340469  | -0.151268 |
| 27 | 35 | 0 | -3.430284 | 7.274040  | -1.562879 |
| 28 | 35 | 0 | -7.781769 | -4.034045 | 0.947137  |
| 29 | 7  | 0 | 0.140788  | -0.375780 | 0.362317  |
| 30 | 6  | 0 | -0.609805 | -1.007209 | -0.686375 |
| 31 | 6  | 0 | -1.313993 | -0.247875 | -1.622772 |
| 32 | 6  | 0 | -2.094827 | -0.869258 | -2.593765 |
| 33 | 6  | 0 | -2.144117 | -2.257611 | -2.637479 |
| 34 | 6  | 0 | -1.408320 | -3.034118 | -1.747623 |
| 35 | 6  | 0 | -0.647031 | -2.402334 | -0.771810 |
| 36 | 35 | 0 | -3.275833 | -3.108374 | -3.893476 |
| 37 | 6  | 0 | 1.433313  | -0.863074 | 0.532258  |
| 38 | 6  | 0 | 1.908589  | -1.425348 | 1.642654  |
| 39 | 6  | 0 | 3.392063  | -1.626240 | 1.514061  |
| 40 | 7  | 0 | 3.651447  | -1.218540 | 0.125528  |
| 41 | 6  | 0 | 2.502685  | -0.733013 | -0.488468 |
| 42 | 6  | 0 | 1.020579  | -1.587047 | 2.829605  |
| 43 | 6  | 0 | 4.124839  | -0.764848 | 2.530396  |
| 44 | 6  | 0 | 4.777455  | -1.346755 | 3.614584  |
| 45 | 6  | 0 | 5.397775  | -0.545026 | 4.572632  |
| 46 | 6  | 0 | 5.366926  | 0.840292  | 4.444835  |
| 47 | 6  | 0 | 4.708211  | 1.424147  | 3.361632  |
| 48 | 6  | 0 | 4.082472  | 0.626284  | 2.410834  |
| 49 | 6  | 0 | 4.938799  | -1.276033 | -0.440328 |
| 50 | 6  | 0 | 5.237028  | -0.642078 | -1.656132 |
| 51 | 6  | 0 | 6.519440  | -0.715263 | -2.186336 |
| 52 | 6  | 0 | 7.512903  | -1.411292 | -1.509617 |
| 53 | 6  | 0 | 7.238454  | -2.038788 | -0.302489 |
| 54 | 6  | 0 | 5.955837  | -1.971862 | 0.227782  |
| 55 | 8  | 0 | 2.387721  | -0.295574 | -1.618419 |
| 56 | 35 | 0 | 9.260633  | -1.504084 | -2.239473 |
| 57 | 1  | 0 | 3.658103  | -2.681453 | 1.655534  |
| 58 | 1  | 0 | -0.582492 | -0.392741 | 3.699304  |
| 59 | 1  | 0 | 0.857537  | 0.505856  | 3.198584  |
| 60 | 1  | 0 | 0.370597  | -2.461596 | 2.702350  |
| 61 | 1  | 0 | 1.591570  | -1.722707 | 3.752867  |
| 62 | 1  | 0 | -0.897570 | 1.983967  | 2.603777  |
| 63 | 1  | 0 | 4.806779  | -2.430204 | 3.708761  |
| 64 | 1  | 0 | 5.908616  | -1.005240 | 5.412452  |
| 65 | 1  | 0 | 5.854779  | 1.465823  | 5.185648  |
| 66 | 1  | 0 | 4.679935  | 2.504224  | 3.256537  |
| 67 | 1  | 0 | 3.561780  | 1.083337  | 1.569890  |
| 68 | 1  | 0 | 0.918823  | 3.162836  | 3.137491  |
| 69 | 1  | 0 | 3.020211  | 4.326589  | 2.562826  |
| 70 | 1  | 0 | 3.924020  | 4.188575  | 0.248791  |
| 71 | 1  | 0 | 2.678557  | 2.908310  | -1.481002 |
| 72 | 1  | 0 | 0.568630  | 1.787149  | -0.919242 |
| 73 | 1  | 0 | -1.242186 | 4.269391  | 1.763061  |
| 74 | 1  | 0 | -1.874906 | 6.457554  | 0.813622  |
| 75 | 1  | 0 | -3.941470 | 4.482029  | -2.389376 |
| 76 | 1  | 0 | -3.306804 | 2.282517  | -1.446079 |
| 77 | 1  | 0 | 4.466685  | -0.099161 | -2.183637 |
| 78 | 1  | 0 | 6.742629  | -0.224518 | -3.127252 |
| 79 | 1  | 0 | 8.016519  | -2.579418 | 0.224602  |
| 80 | 1  | 0 | 5.762737  | -2.466564 | 1.171770  |
| 81 | 1  | 0 | -1.265896 | 0.835498  | -1.586315 |
| 82 | 1  | 0 | -2.660168 | -0.278989 | -3.306243 |
| 83 | 1  | 0 | -1.455806 | -4.116048 | -1.797708 |
| 84 | 1  | 0 | -0.091940 | -2.994412 | -0.049817 |
| 85 | 1  | 0 | -4.093945 | -2.249353 | 3.815638  |

|    |   |   |           |           |           |
|----|---|---|-----------|-----------|-----------|
| 86 | 1 | 0 | -6.302053 | -3.327066 | 3.402247  |
| 87 | 1 | 0 | -5.697100 | -2.911263 | -0.833389 |
| 88 | 1 | 0 | -3.539436 | -1.765422 | -0.409803 |

-----  
**5a<sub>hetero-exo'</sub>**  
 -----

| Center<br>Number | Atomic<br>Number | Atomic<br>Type | Coordinates (Angstroms) |           |           |
|------------------|------------------|----------------|-------------------------|-----------|-----------|
|                  |                  |                | X                       | Y         | Z         |
| 1                | 6                | 0              | 1.662398                | -0.711960 | 0.208299  |
| 2                | 7                | 0              | 0.311304                | -0.689119 | -0.131234 |
| 3                | 6                | 0              | 2.204291                | -1.257645 | 1.305172  |
| 4                | 6                | 0              | 3.706508                | -1.172081 | 1.241255  |
| 5                | 7                | 0              | 3.936895                | -0.511965 | -0.044493 |
| 6                | 6                | 0              | 2.748422                | -0.248980 | -0.708022 |
| 7                | 8                | 0              | 2.621522                | 0.246930  | -1.811107 |
| 8                | 6                | 0              | 5.231676                | -0.208687 | -0.510667 |
| 9                | 6                | 0              | 4.356152                | -2.541352 | 1.333957  |
| 10               | 6                | 0              | -0.149016               | 0.408116  | -0.934467 |
| 11               | 6                | 0              | -0.594014               | -1.116790 | 0.978115  |
| 12               | 6                | 0              | 0.036901                | -2.295438 | 1.729532  |
| 13               | 6                | 0              | 1.407859                | -1.979659 | 2.335497  |
| 14               | 6                | 0              | -1.950981               | -1.510704 | 0.402732  |
| 15               | 6                | 0              | -2.859108               | -0.295401 | 0.462558  |
| 16               | 7                | 0              | -2.180507               | 0.647766  | 1.191354  |
| 17               | 6                | 0              | -0.983978               | 0.119918  | 1.866046  |
| 18               | 6                | 0              | -1.255517               | -0.184777 | 3.327440  |
| 19               | 6                | 0              | -2.515511               | 2.020196  | 1.245327  |
| 20               | 8                | 0              | -3.956047               | -0.178946 | -0.046959 |
| 21               | 6                | 0              | 4.967024                | -2.944691 | 2.519768  |
| 22               | 6                | 0              | 5.510080                | -4.223872 | 2.631463  |
| 23               | 6                | 0              | 5.446548                | -5.102068 | 1.553601  |
| 24               | 6                | 0              | 4.835433                | -4.700544 | 0.365375  |
| 25               | 6                | 0              | 4.287826                | -3.426851 | 0.257057  |
| 26               | 6                | 0              | -2.404514               | -0.875300 | 3.722261  |
| 27               | 6                | 0              | -2.622447               | -1.167034 | 5.065390  |
| 28               | 6                | 0              | -1.700947               | -0.762099 | 6.030122  |
| 29               | 6                | 0              | -0.561487               | -0.060354 | 5.646527  |
| 30               | 6                | 0              | -0.343166               | 0.227032  | 4.300850  |
| 31               | 6                | 0              | -1.945763               | 2.831003  | 2.231992  |
| 32               | 6                | 0              | -2.159278               | 4.205739  | 2.224285  |
| 33               | 6                | 0              | -2.946490               | 4.768023  | 1.229567  |
| 34               | 6                | 0              | -3.536390               | 3.973518  | 0.252355  |
| 35               | 6                | 0              | -3.327904               | 2.601365  | 0.261024  |
| 36               | 6                | 0              | 5.476847                | 0.107698  | -1.854822 |
| 37               | 6                | 0              | 6.768052                | 0.398629  | -2.279531 |
| 38               | 6                | 0              | 7.820719                | 0.367366  | -1.374295 |
| 39               | 6                | 0              | 7.598530                | 0.046012  | -0.042146 |
| 40               | 6                | 0              | 6.308125                | -0.238975 | 0.386510  |
| 41               | 6                | 0              | 0.244518                | 1.721945  | -0.666441 |
| 42               | 6                | 0              | -0.326863               | 2.783233  | -1.356874 |
| 43               | 6                | 0              | -1.302841               | 2.519330  | -2.311141 |
| 44               | 6                | 0              | -1.664928               | 1.217176  | -2.635368 |
| 45               | 6                | 0              | -1.066642               | 0.160502  | -1.954375 |
| 46               | 7                | 0              | -2.197375               | -2.691265 | 0.024365  |
| 47               | 6                | 0              | -3.418967               | -3.132576 | -0.528291 |
| 48               | 6                | 0              | -3.979922               | -4.290231 | 0.018518  |
| 49               | 6                | 0              | -5.139970               | -4.833391 | -0.520206 |
| 50               | 6                | 0              | -5.704418               | -4.239823 | -1.643330 |
| 51               | 6                | 0              | -5.136509               | -3.111723 | -2.226225 |
| 52               | 6                | 0              | -3.996704               | -2.553442 | -1.662140 |
| 53               | 35               | 0              | 9.579351                | 0.762370  | -1.962721 |
| 54               | 35               | 0              | -3.223688               | 6.641799  | 1.201255  |
| 55               | 35               | 0              | -2.201076               | 3.967174  | -3.134061 |
| 56               | 35               | 0              | -7.268807               | -4.991172 | -2.405545 |
| 57               | 1                | 0              | 4.078120                | -0.539956 | 2.059911  |
| 58               | 1                | 0              | 0.135792                | -3.105835 | 1.001739  |
| 59               | 1                | 0              | -0.662773               | -2.632693 | 2.497494  |
| 60               | 1                | 0              | 1.909326                | -2.915020 | 2.610660  |
| 61               | 1                | 0              | 1.316385                | -1.394809 | 3.258546  |
| 62               | 1                | 0              | -0.185898               | 0.867469  | 1.800822  |
| 63               | 1                | 0              | 5.021705                | -2.254210 | 3.358832  |
| 64               | 1                | 0              | 5.986981                | -4.528930 | 3.557543  |
| 65               | 1                | 0              | 5.873788                | -6.096394 | 1.635787  |



|    |   |   |           |           |           |
|----|---|---|-----------|-----------|-----------|
| 66 | 1 | 0 | 4.785617  | -5.382000 | -0.477965 |
| 67 | 1 | 0 | 3.811435  | -3.112203 | -0.668404 |
| 68 | 1 | 0 | -3.141169 | -1.183793 | 2.983811  |
| 69 | 1 | 0 | -3.517781 | -1.705178 | 5.359399  |
| 70 | 1 | 0 | -1.876426 | -0.985581 | 7.077451  |
| 71 | 1 | 0 | 0.154505  | 0.270218  | 6.392096  |
| 72 | 1 | 0 | 0.542335  | 0.785314  | 4.001283  |
| 73 | 1 | 0 | -1.337482 | 2.400183  | 3.018856  |
| 74 | 1 | 0 | -1.712191 | 4.830524  | 2.989128  |
| 75 | 1 | 0 | -4.140022 | 4.422789  | -0.528022 |
| 76 | 1 | 0 | -3.773285 | 1.990141  | -0.511804 |
| 77 | 1 | 0 | 4.661515  | 0.129803  | -2.562516 |
| 78 | 1 | 0 | 6.950896  | 0.643722  | -3.319925 |
| 79 | 1 | 0 | 8.423506  | 0.018241  | 0.660789  |
| 80 | 1 | 0 | 6.154337  | -0.490414 | 1.429105  |
| 81 | 1 | 0 | 0.991554  | 1.919666  | 0.097800  |
| 82 | 1 | 0 | -0.048680 | 3.806134  | -1.128366 |
| 83 | 1 | 0 | -2.406759 | 1.029893  | -3.403934 |
| 84 | 1 | 0 | -1.317181 | -0.866351 | -2.202232 |
| 85 | 1 | 0 | -3.501631 | -4.754566 | 0.874714  |
| 86 | 1 | 0 | -5.589323 | -5.718557 | -0.084604 |
| 87 | 1 | 0 | -5.586567 | -2.667140 | -3.106597 |
| 88 | 1 | 0 | -3.560739 | -1.660377 | -2.094814 |

-----  
**5a<sub>homo</sub>-in/in-exo**  
 -----

| Center<br>Number | Atomic<br>Number | Atomic<br>Type | Coordinates (Angstroms) |           |           |
|------------------|------------------|----------------|-------------------------|-----------|-----------|
|                  |                  |                | X                       | Y         | Z         |
| 1                | 6                | 0              | 1.286054                | -1.166597 | 0.800947  |
| 2                | 7                | 0              | -0.021122               | -0.902389 | 0.400084  |
| 3                | 6                | 0              | 1.813015                | -0.907307 | 2.002636  |
| 4                | 6                | 0              | 3.315256                | -0.982139 | 1.911512  |
| 5                | 7                | 0              | 3.536143                | -1.532593 | 0.573669  |
| 6                | 6                | 0              | 2.348117                | -1.600842 | -0.146060 |
| 7                | 8                | 0              | 2.195976                | -1.942895 | -1.302485 |
| 8                | 6                | 0              | 4.824678                | -1.847206 | 0.100679  |
| 9                | 6                | 0              | 3.859143                | 0.433133  | 2.081706  |
| 10               | 6                | 0              | -0.766688               | -1.980759 | -0.179343 |
| 11               | 6                | 0              | -0.716282               | -0.011625 | 1.381818  |
| 12               | 6                | 0              | -0.474742               | -0.471176 | 2.823989  |
| 13               | 6                | 0              | 1.017716                | -0.479835 | 3.187326  |
| 14               | 6                | 0              | -2.183532               | 0.043233  | 1.018827  |
| 15               | 6                | 0              | -2.341296               | 1.106914  | -0.053732 |
| 16               | 7                | 0              | -1.167667               | 1.820866  | -0.055717 |
| 17               | 6                | 0              | -0.252954               | 1.439747  | 1.034423  |
| 18               | 6                | 0              | -0.290439               | 2.424648  | 2.187986  |
| 19               | 6                | 0              | -0.833312               | 2.855557  | -0.959398 |
| 20               | 8                | 0              | -3.300770               | 1.238727  | -0.787458 |
| 21               | 6                | 0              | 4.155926                | 0.906285  | 3.360111  |
| 22               | 6                | 0              | 4.528274                | 2.236783  | 3.548998  |
| 23               | 6                | 0              | 4.614336                | 3.099569  | 2.458444  |
| 24               | 6                | 0              | 4.327793                | 2.626442  | 1.177817  |
| 25               | 6                | 0              | 3.945335                | 1.300610  | 0.989859  |
| 26               | 6                | 0              | -1.497508               | 2.914838  | 2.690400  |
| 27               | 6                | 0              | -1.504169               | 3.792044  | 3.771672  |
| 28               | 6                | 0              | -0.304064               | 4.195732  | 4.354820  |
| 29               | 6                | 0              | 0.904253                | 3.722478  | 3.849184  |
| 30               | 6                | 0              | 0.908689                | 2.843116  | 2.769498  |
| 31               | 6                | 0              | 0.309010                | 3.633471  | -0.725102 |
| 32               | 6                | 0              | 0.678051                | 4.634748  | -1.615125 |
| 33               | 6                | 0              | -0.093990               | 4.866275  | -2.744888 |
| 34               | 6                | 0              | -1.229390               | 4.105748  | -2.993564 |
| 35               | 6                | 0              | -1.601880               | 3.102679  | -2.107243 |
| 36               | 6                | 0              | 5.032332                | -2.358361 | -1.189882 |
| 37               | 6                | 0              | 6.317335                | -2.665505 | -1.620882 |
| 38               | 6                | 0              | 7.401249                | -2.467261 | -0.775452 |
| 39               | 6                | 0              | 7.214813                | -1.964398 | 0.504621  |
| 40               | 6                | 0              | 5.931809                | -1.655817 | 0.940015  |
| 41               | 6                | 0              | -1.522415               | -1.732565 | -1.325598 |
| 42               | 6                | 0              | -2.382623               | -2.703779 | -1.821801 |
| 43               | 6                | 0              | -2.457713               | -3.931143 | -1.170495 |
| 44               | 6                | 0              | -1.665801               | -4.218974 | -0.064986 |
| 45               | 6                | 0              | -0.816984               | -3.233085 | 0.430518  |

|    |    |   |           |           |           |
|----|----|---|-----------|-----------|-----------|
| 46 | 7  | 0 | -3.039881 | -0.753691 | 1.494499  |
| 47 | 6  | 0 | -4.401690 | -0.722831 | 1.118021  |
| 48 | 6  | 0 | -4.941759 | -1.872983 | 0.537221  |
| 49 | 6  | 0 | -6.287388 | -1.911887 | 0.191181  |
| 50 | 6  | 0 | -7.092434 | -0.813882 | 0.472125  |
| 51 | 6  | 0 | -6.575666 | 0.323140  | 1.084151  |
| 52 | 6  | 0 | -5.224202 | 0.368436  | 1.402641  |
| 53 | 35 | 0 | 9.151123  | -2.884914 | -1.373882 |
| 54 | 35 | 0 | 0.406282  | 6.233851  | -3.956416 |
| 55 | 35 | 0 | -3.728829 | -5.205823 | -1.757149 |
| 56 | 35 | 0 | -8.934940 | -0.871349 | 0.026292  |
| 57 | 1  | 0 | 3.737849  | -1.648665 | 2.673395  |
| 58 | 1  | 0 | -0.897296 | -1.478393 | 2.902321  |
| 59 | 1  | 0 | -1.036084 | 0.165245  | 3.512935  |
| 60 | 1  | 0 | 1.193060  | -1.168883 | 4.022707  |
| 61 | 1  | 0 | 1.346429  | 0.506390  | 3.534136  |
| 62 | 1  | 0 | 0.765728  | 1.388491  | 0.636896  |
| 63 | 1  | 0 | 4.090538  | 0.233763  | 4.212720  |
| 64 | 1  | 0 | 4.755464  | 2.595608  | 4.547995  |
| 65 | 1  | 0 | 4.908343  | 4.134090  | 2.603847  |
| 66 | 1  | 0 | 4.399023  | 3.290993  | 0.322336  |
| 67 | 1  | 0 | 3.719680  | 0.937554  | -0.009784 |
| 68 | 1  | 0 | -2.440569 | 2.624681  | 2.232650  |
| 69 | 1  | 0 | -2.448373 | 4.165901  | 4.154409  |
| 70 | 1  | 0 | -0.312307 | 4.883751  | 5.194109  |
| 71 | 1  | 0 | 1.846981  | 4.038925  | 4.285258  |
| 72 | 1  | 0 | 1.855772  | 2.482121  | 2.369847  |
| 73 | 1  | 0 | 0.919052  | 3.482869  | 0.156865  |
| 74 | 1  | 0 | 1.561963  | 5.232177  | -1.422676 |
| 75 | 1  | 0 | -1.825980 | 4.289902  | -3.880046 |
| 76 | 1  | 0 | -2.485493 | 2.515594  | -2.307186 |
| 77 | 1  | 0 | 4.192492  | -2.513969 | -1.850596 |
| 78 | 1  | 0 | 6.470033  | -3.060593 | -2.619170 |
| 79 | 1  | 0 | 8.062569  | -1.809938 | 1.162589  |
| 80 | 1  | 0 | 5.810623  | -1.255666 | 1.939494  |
| 81 | 1  | 0 | -1.447544 | -0.766368 | -1.815410 |
| 82 | 1  | 0 | -2.999208 | -2.506759 | -2.691337 |
| 83 | 1  | 0 | -1.734422 | -5.186306 | 0.419727  |
| 84 | 1  | 0 | -0.213429 | -3.427821 | 1.312713  |
| 85 | 1  | 0 | -4.301181 | -2.726405 | 0.337730  |
| 86 | 1  | 0 | -6.705321 | -2.793307 | -0.282627 |
| 87 | 1  | 0 | -7.220772 | 1.166739  | 1.302401  |
| 88 | 1  | 0 | -4.804447 | 1.250490  | 1.876414  |

-----  
**4f-R**  
 -----

| Center<br>Number | Atomic<br>Number | Atomic<br>Type | Coordinates (Angstroms) |           |           |
|------------------|------------------|----------------|-------------------------|-----------|-----------|
|                  |                  |                | X                       | Y         | Z         |
| 1                | 6                | 0              | 0.028729                | -2.318723 | -0.773690 |
| 2                | 6                | 0              | -1.241032               | -1.498891 | -0.919675 |
| 3                | 7                | 0              | -0.821800               | -0.162180 | -0.474704 |
| 4                | 6                | 0              | 0.524835                | -0.028860 | -0.237981 |
| 5                | 6                | 0              | 1.138932                | -1.404033 | -0.450698 |
| 6                | 6                | 0              | -1.753621               | 0.904389  | -0.385300 |
| 7                | 6                | 0              | -1.585267               | 1.936717  | 0.537190  |
| 8                | 6                | 0              | -2.513081               | 2.973267  | 0.618493  |
| 9                | 6                | 0              | -3.630580               | 2.979587  | -0.216801 |
| 10               | 6                | 0              | -3.809285               | 1.936158  | -1.131234 |
| 11               | 6                | 0              | -2.882485               | 0.911741  | -1.215414 |
| 12               | 6                | 0              | -2.403932               | -2.049330 | -0.121429 |
| 13               | 6                | 0              | -3.413282               | -2.760422 | -0.767016 |
| 14               | 6                | 0              | -4.459553               | -3.319899 | -0.034269 |
| 15               | 6                | 0              | -4.503180               | -3.160344 | 1.347348  |
| 16               | 6                | 0              | -3.496891               | -2.443090 | 1.995711  |
| 17               | 6                | 0              | -2.450003               | -1.892570 | 1.265322  |
| 18               | 8                | 0              | 1.092676                | 0.984808  | 0.123601  |
| 19               | 7                | 0              | 2.339614                | -1.799876 | -0.304304 |
| 20               | 6                | 0              | 3.446372                | -0.961648 | -0.081697 |
| 21               | 6                | 0              | 3.698758                | 0.201128  | -0.812176 |
| 22               | 6                | 0              | 4.868036                | 0.929368  | -0.615693 |
| 23               | 6                | 0              | 5.799895                | 0.503336  | 0.334486  |
| 24               | 6                | 0              | 5.563722                | -0.671687 | 1.058465  |
| 25               | 6                | 0              | 4.414850                | -1.407700 | 0.830053  |

|    |   |   |           |           |           |
|----|---|---|-----------|-----------|-----------|
| 26 | 8 | 0 | -4.591039 | 3.939658  | -0.213385 |
| 27 | 8 | 0 | 6.963103  | 1.147460  | 0.611304  |
| 28 | 6 | 0 | 0.124942  | -3.639060 | -0.904222 |
| 29 | 1 | 0 | -3.529873 | -2.312746 | 3.072839  |
| 30 | 1 | 0 | -4.686120 | 1.947633  | -1.769777 |
| 31 | 1 | 0 | -1.523394 | -1.459230 | -1.980400 |
| 32 | 1 | 0 | 2.979091  | 0.535085  | -1.551242 |
| 33 | 1 | 0 | -0.723790 | 1.938800  | 1.191057  |
| 34 | 1 | 0 | 5.037716  | 1.822577  | -1.204811 |
| 35 | 1 | 0 | 4.238198  | -2.334509 | 1.366750  |
| 36 | 1 | 0 | -3.383829 | -2.874373 | -1.848482 |
| 37 | 1 | 0 | -1.666663 | -1.330456 | 1.768046  |
| 38 | 1 | 0 | -2.351432 | 3.761647  | 1.343678  |
| 39 | 1 | 0 | 6.306904  | -0.995956 | 1.779272  |
| 40 | 1 | 0 | -3.045567 | 0.112953  | -1.930852 |
| 41 | 1 | 0 | -5.320207 | -3.588591 | 1.919369  |
| 42 | 1 | 0 | -5.242054 | -3.871525 | -0.545780 |
| 43 | 1 | 0 | 1.087439  | -4.125762 | -0.782632 |
| 44 | 1 | 0 | -0.742577 | -4.255267 | -1.120915 |
| 45 | 6 | 0 | 7.232804  | 2.340859  | -0.098765 |
| 46 | 1 | 0 | 8.190951  | 2.703539  | 0.271893  |
| 47 | 1 | 0 | 7.305451  | 2.153352  | -1.176117 |
| 48 | 1 | 0 | 6.459632  | 3.095027  | 0.086370  |
| 49 | 6 | 0 | -4.444025 | 5.003232  | 0.708064  |
| 50 | 1 | 0 | -5.301799 | 5.657087  | 0.554746  |
| 51 | 1 | 0 | -4.444532 | 4.635686  | 1.740489  |
| 52 | 1 | 0 | -3.520120 | 5.562837  | 0.522964  |

-----  
**4f-S**  
 -----

| Center<br>Number | Atomic<br>Number | Atomic<br>Type | Coordinates (Angstroms) |           |           |
|------------------|------------------|----------------|-------------------------|-----------|-----------|
|                  |                  |                | X                       | Y         | Z         |
| 1                | 6                | 0              | -0.011206               | -2.138051 | -1.219785 |
| 2                | 6                | 0              | 1.320288                | -1.452152 | -0.971265 |
| 3                | 7                | 0              | 0.915558                | -0.157644 | -0.397483 |
| 4                | 6                | 0              | -0.435828               | 0.064095  | -0.348516 |
| 5                | 6                | 0              | -1.098988               | -1.221171 | -0.826632 |
| 6                | 6                | 0              | 1.859715                | 0.894597  | -0.211584 |
| 7                | 6                | 0              | 1.766422                | 2.047965  | -0.984909 |
| 8                | 6                | 0              | 2.682593                | 3.085696  | -0.831467 |
| 9                | 6                | 0              | 3.714221                | 2.960079  | 0.101866  |
| 10               | 6                | 0              | 3.809011                | 1.800943  | 0.880836  |
| 11               | 6                | 0              | 2.885179                | 0.779275  | 0.733000  |
| 12               | 6                | 0              | 2.249527                | -2.235696 | -0.067222 |
| 13               | 6                | 0              | 3.540983                | -2.545637 | -0.483440 |
| 14               | 6                | 0              | 4.406262                | -3.241283 | 0.362161  |
| 15               | 6                | 0              | 3.980746                | -3.622876 | 1.629973  |
| 16               | 6                | 0              | 2.684576                | -3.315719 | 2.051008  |
| 17               | 6                | 0              | 1.822657                | -2.629783 | 1.204595  |
| 18               | 8                | 0              | -0.971600               | 1.110555  | -0.037225 |
| 19               | 7                | 0              | -2.329732               | -1.507384 | -0.981800 |
| 20               | 6                | 0              | -3.408017               | -0.720197 | -0.541961 |
| 21               | 6                | 0              | -3.473076               | -0.109692 | 0.712408  |
| 22               | 6                | 0              | -4.617830               | 0.568918  | 1.118749  |
| 23               | 6                | 0              | -5.715742               | 0.656296  | 0.258491  |
| 24               | 6                | 0              | -5.666812               | 0.031727  | -0.993899 |
| 25               | 6                | 0              | -4.537197               | -0.670172 | -1.373733 |
| 26               | 8                | 0              | 4.663052                | 3.903419  | 0.326658  |
| 27               | 8                | 0              | -6.871871               | 1.304169  | 0.553705  |
| 28               | 6                | 0              | -0.175317               | -3.372555 | -1.688758 |
| 29               | 1                | 0              | 2.348859                | -3.613687 | 3.039341  |
| 30               | 1                | 0              | 4.611766                | 1.728621  | 1.606839  |
| 31               | 1                | 0              | 1.834457                | -1.259594 | -1.922295 |
| 32               | 1                | 0              | -2.625153               | -0.174973 | 1.384684  |
| 33               | 1                | 0              | 0.962392                | 2.140520  | -1.707583 |
| 34               | 1                | 0              | -4.639497               | 1.023977  | -2.101673 |
| 35               | 1                | 0              | -4.501206               | -1.181329 | -2.330629 |
| 36               | 1                | 0              | 3.876690                | -2.232449 | -1.468822 |
| 37               | 1                | 0              | 0.814296                | -2.385303 | 1.531460  |
| 38               | 1                | 0              | 2.582681                | 3.974430  | -1.442574 |
| 39               | 1                | 0              | -6.535884               | 0.095041  | -1.640195 |
| 40               | 1                | 0              | 2.952310                | -0.106538 | 1.355334  |
| 41               | 1                | 0              | 4.653710                | -4.158569 | 2.292043  |

|    |   |   |           |           |           |
|----|---|---|-----------|-----------|-----------|
| 42 | 1 | 0 | 5.412573  | -3.476203 | 0.030035  |
| 43 | 1 | 0 | -1.175481 | -3.768764 | -1.833632 |
| 44 | 1 | 0 | 0.672197  | -4.006749 | -1.931373 |
| 45 | 6 | 0 | 4.594080  | 5.094418  | -0.434951 |
| 46 | 1 | 0 | 5.428500  | 5.712277  | -0.105381 |
| 47 | 1 | 0 | 4.694502  | 4.885639  | -1.505992 |
| 48 | 1 | 0 | 3.652470  | 5.625104  | -0.255047 |
| 49 | 6 | 0 | -6.957373 | 1.946687  | 1.811295  |
| 50 | 1 | 0 | -7.943353 | 2.408602  | 1.848473  |
| 51 | 1 | 0 | -6.860370 | 1.226480  | 2.631640  |
| 52 | 1 | 0 | -6.187118 | 2.719251  | 1.914319  |

-----  
**RCf<sub>homo</sub>**  
 -----

| Center<br>Number | Atomic<br>Number | Atomic<br>Type | Coordinates (Angstroms) |           |           |
|------------------|------------------|----------------|-------------------------|-----------|-----------|
|                  |                  |                | X                       | Y         | Z         |
| 1                | 6                | 0              | -2.799699               | 0.223616  | 2.865468  |
| 2                | 6                | 0              | -1.686193               | -0.080264 | 2.072633  |
| 3                | 6                | 0              | -1.620039               | -1.354994 | 1.482672  |
| 4                | 6                | 0              | -2.627319               | -2.277005 | 1.693088  |
| 5                | 6                | 0              | -3.723626               | -1.967700 | 2.507887  |
| 6                | 6                | 0              | -3.796478               | -0.712961 | 3.118210  |
| 7                | 7                | 0              | -0.801592               | 0.984799  | 1.839294  |
| 8                | 6                | 0              | 0.450961                | 0.942422  | 1.598736  |
| 9                | 6                | 0              | 1.237590                | 2.154812  | 1.320194  |
| 10               | 6                | 0              | 2.628762                | 1.734020  | 0.891107  |
| 11               | 7                | 0              | 2.650007                | 0.299432  | 1.206149  |
| 12               | 6                | 0              | 1.435879                | -0.214133 | 1.593412  |
| 13               | 6                | 0              | 0.798540                | 3.405840  | 1.437271  |
| 14               | 6                | 0              | -0.715273               | 3.454419  | -1.296720 |
| 15               | 6                | 0              | -1.187294               | 2.211885  | -1.226224 |
| 16               | 6                | 0              | -0.424027               | 0.991775  | -1.528249 |
| 17               | 6                | 0              | -1.422327               | -0.152687 | -1.521430 |
| 18               | 7                | 0              | -2.634561               | 0.375348  | -1.144347 |
| 19               | 6                | 0              | -2.599178               | 1.814265  | -0.848162 |
| 20               | 6                | 0              | -3.789527               | -0.389154 | -0.834160 |
| 21               | 6                | 0              | -3.944469               | -1.710204 | -1.267445 |
| 22               | 6                | 0              | -5.032477               | -2.471204 | -0.848019 |
| 23               | 6                | 0              | -5.997070               | -1.917651 | -0.006743 |
| 24               | 6                | 0              | -5.886356               | -0.576665 | 0.363655  |
| 25               | 6                | 0              | -4.794975               | 0.175718  | -0.036799 |
| 26               | 8                | 0              | -7.065194               | -2.594475 | 0.494595  |
| 27               | 6                | 0              | -7.050608               | -4.003028 | 0.357095  |
| 28               | 8                | 0              | -1.198867               | -1.313125 | -1.821231 |
| 29               | 7                | 0              | 0.822519                | 1.021141  | -1.797382 |
| 30               | 6                | 0              | 1.688130                | -0.048302 | -2.077253 |
| 31               | 6                | 0              | 1.656190                | -1.313592 | -1.481136 |
| 32               | 6                | 0              | 2.643646                | -2.256864 | -1.747819 |
| 33               | 6                | 0              | 3.679169                | -1.951853 | -2.633590 |
| 34               | 6                | 0              | 3.721032                | -0.691519 | -3.242970 |
| 35               | 6                | 0              | 2.757764                | 0.252507  | -2.940304 |
| 36               | 6                | 0              | -3.648815               | 2.607375  | -1.599553 |
| 37               | 6                | 0              | -4.243174               | 3.711312  | -0.989254 |
| 38               | 6                | 0              | -5.161622               | 4.493258  | -1.687737 |
| 39               | 6                | 0              | -5.496435               | 4.167544  | -2.999176 |
| 40               | 6                | 0              | -4.908338               | 3.059947  | -3.609918 |
| 41               | 6                | 0              | -3.985849               | 2.284829  | -2.914821 |
| 42               | 8                | 0              | 4.699695                | -2.793988 | -2.939066 |
| 43               | 6                | 0              | 4.668283                | -4.093868 | -2.374619 |
| 44               | 6                | 0              | 3.731741                | 2.509119  | 1.579222  |
| 45               | 6                | 0              | 4.352438                | 3.564037  | 0.912114  |
| 46               | 6                | 0              | 5.327624                | 4.327037  | 1.552908  |
| 47               | 6                | 0              | 5.692376                | 4.030219  | 2.862938  |
| 48               | 6                | 0              | 5.077440                | 2.971060  | 3.531129  |
| 49               | 6                | 0              | 4.098861                | 2.216036  | 2.893833  |
| 50               | 6                | 0              | 3.783667                | -0.492643 | 0.890744  |
| 51               | 6                | 0              | 4.710569                | -0.026412 | -0.041538 |
| 52               | 6                | 0              | 5.782008                | -0.816966 | -0.446849 |
| 53               | 6                | 0              | 5.938943                | -2.096007 | 0.082991  |
| 54               | 6                | 0              | 5.044874                | -2.544906 | 1.060516  |
| 55               | 6                | 0              | 3.982185                | -1.755681 | 1.468809  |
| 56               | 8                | 0              | 1.209663                | -1.372355 | 1.898746  |
| 57               | 8                | 0              | 6.913869                | -2.969395 | -0.285914 |

|     |   |   |           |           |           |
|-----|---|---|-----------|-----------|-----------|
| 58  | 6 | 0 | 7.732019  | -2.595074 | -1.379836 |
| 59  | 8 | 0 | -4.666895 | -2.937148 | 2.624831  |
| 60  | 6 | 0 | -5.822238 | -2.630863 | 3.382358  |
| 61  | 1 | 0 | 2.711030  | 1.863228  | -0.197511 |
| 62  | 1 | 0 | -1.341265 | 4.317582  | -1.090007 |
| 63  | 1 | 0 | 0.319663  | 3.620971  | -1.578269 |
| 64  | 1 | 0 | -0.225477 | 3.590185  | 1.746581  |
| 65  | 1 | 0 | 1.442041  | 4.258270  | 1.239629  |
| 66  | 1 | 0 | -2.730513 | 1.955397  | 0.234164  |
| 67  | 1 | 0 | 4.074631  | 3.785905  | -0.116283 |
| 68  | 1 | 0 | 5.806066  | 5.145838  | 1.024683  |
| 69  | 1 | 0 | 6.456449  | 4.617865  | 3.362014  |
| 70  | 1 | 0 | 5.362299  | 2.733280  | 4.551303  |
| 71  | 1 | 0 | 3.620548  | 1.388562  | 3.411754  |
| 72  | 1 | 0 | -3.989871 | 3.955967  | 0.040409  |
| 73  | 1 | 0 | -5.619909 | 5.349941  | -1.203509 |
| 74  | 1 | 0 | -6.216771 | 4.770319  | -3.543155 |
| 75  | 1 | 0 | -5.170194 | 2.799308  | -4.630677 |
| 76  | 1 | 0 | -3.529333 | 1.419600  | -3.388684 |
| 77  | 1 | 0 | -4.728532 | 1.202723  | 0.299568  |
| 78  | 1 | 0 | -6.655447 | -0.140998 | 0.993801  |
| 79  | 1 | 0 | -5.103195 | -3.501433 | -1.176652 |
| 80  | 1 | 0 | -3.196587 | -2.160328 | -1.902586 |
| 81  | 1 | 0 | 3.290714  | -2.125326 | 2.211696  |
| 82  | 1 | 0 | 5.196071  | -3.531449 | 1.487478  |
| 83  | 1 | 0 | 6.460601  | -0.432345 | -1.198818 |
| 84  | 1 | 0 | 4.596334  | 0.950999  | -0.494779 |
| 85  | 1 | 0 | -0.796261 | -1.612025 | 0.831203  |
| 86  | 1 | 0 | -2.602869 | -3.246727 | 1.207160  |
| 87  | 1 | 0 | -4.638241 | -0.440123 | 3.743459  |
| 88  | 1 | 0 | -2.867483 | 1.219216  | 3.293963  |
| 89  | 1 | 0 | 2.803093  | 1.246089  | -3.376214 |
| 90  | 1 | 0 | 4.540888  | -0.466065 | -3.917354 |
| 91  | 1 | 0 | 2.607060  | -3.211735 | -1.237187 |
| 92  | 1 | 0 | 0.871368  | -1.562138 | -0.778652 |
| 93  | 1 | 0 | 8.386380  | -3.445136 | -1.572465 |
| 94  | 1 | 0 | 7.120361  | -2.386593 | -2.265106 |
| 95  | 1 | 0 | 8.341645  | -1.716941 | -1.137488 |
| 96  | 1 | 0 | 5.555859  | -4.604828 | -2.748082 |
| 97  | 1 | 0 | 4.706608  | -4.050850 | -1.280852 |
| 98  | 1 | 0 | 3.770030  | -4.635024 | -2.692225 |
| 99  | 1 | 0 | -6.461293 | -3.512329 | 3.329638  |
| 100 | 1 | 0 | -5.564664 | -2.426025 | 4.427784  |
| 101 | 1 | 0 | -6.353187 | -1.772920 | 2.955756  |
| 102 | 1 | 0 | -7.905599 | -4.372299 | 0.923729  |
| 103 | 1 | 0 | -7.156184 | -4.304774 | -0.691105 |
| 104 | 1 | 0 | -6.123362 | -4.419096 | 0.768201  |

-----  
**RCf<sub>hetero</sub>**  
 -----

| Center<br>Number | Atomic<br>Number | Atomic<br>Type | Coordinates (Angstroms) |           |           |
|------------------|------------------|----------------|-------------------------|-----------|-----------|
|                  |                  |                | X                       | Y         | Z         |
| 1                | 6                | 0              | -0.566152               | -1.444961 | 3.273925  |
| 2                | 6                | 0              | -1.110417               | -0.781182 | 2.170899  |
| 3                | 6                | 0              | -2.335409               | -1.235084 | 1.654422  |
| 4                | 6                | 0              | -2.953139               | -2.361079 | 2.165836  |
| 5                | 6                | 0              | -2.385001               | -3.034969 | 3.253941  |
| 6                | 6                | 0              | -1.197285               | -2.559482 | 3.817843  |
| 7                | 7                | 0              | -0.605007               | 0.404859  | 1.613354  |
| 8                | 6                | 0              | 0.620775                | 0.691900  | 1.406760  |
| 9                | 6                | 0              | 1.054647                | 1.994680  | 0.888802  |
| 10               | 6                | 0              | 2.471321                | 1.848424  | 0.371762  |
| 11               | 7                | 0              | 2.858648                | 0.501685  | 0.816164  |
| 12               | 6                | 0              | 1.858190                | -0.186054 | 1.466380  |
| 13               | 6                | 0              | 0.337849                | 3.116290  | 0.924004  |
| 14               | 8                | 0              | 1.933816                | -1.304885 | 1.940352  |
| 15               | 6                | 0              | 4.070184                | -0.076837 | 0.357908  |
| 16               | 6                | 0              | 4.844111                | 0.605660  | -0.594786 |
| 17               | 6                | 0              | 5.995423                | 0.036939  | -1.110761 |
| 18               | 6                | 0              | 6.413625                | -1.226614 | -0.687624 |
| 19               | 6                | 0              | 5.669548                | -1.900531 | 0.278808  |
| 20               | 6                | 0              | 4.512647                | -1.327520 | 0.802065  |
| 21               | 6                | 0              | 3.394888                | 2.940385  | 0.871058  |

|    |   |   |            |           |           |
|----|---|---|------------|-----------|-----------|
| 22 | 6 | 0 | 3.610787   | 4.067011  | 0.077485  |
| 23 | 6 | 0 | 4.400820   | 5.116459  | 0.543132  |
| 24 | 6 | 0 | 4.987833   | 5.038258  | 1.803255  |
| 25 | 6 | 0 | 4.779892   | 3.909687  | 2.595651  |
| 26 | 6 | 0 | 3.983865   | 2.866145  | 2.133531  |
| 27 | 8 | 0 | 7.541797   | -1.714718 | -1.275555 |
| 28 | 8 | 0 | -3.065376  | -4.120095 | 3.701408  |
| 29 | 7 | 0 | 0.436049   | 0.748147  | -2.000234 |
| 30 | 6 | 0 | 1.224802   | -0.412814 | -1.966392 |
| 31 | 6 | 0 | 1.035310   | -1.508844 | -1.104371 |
| 32 | 6 | 0 | 1.944002   | -2.549199 | -1.092818 |
| 33 | 6 | 0 | 3.046331   | -2.549170 | -1.960372 |
| 34 | 6 | 0 | 3.253286   | -1.465680 | -2.814780 |
| 35 | 6 | 0 | 2.363843   | -0.395744 | -2.778657 |
| 36 | 8 | 0 | 3.859475   | -3.631731 | -1.883200 |
| 37 | 6 | 0 | -0.825202  | 0.835695  | -1.831190 |
| 38 | 6 | 0 | -1.531577  | 2.125265  | -1.841303 |
| 39 | 6 | 0 | -3.021460  | 1.867870  | -1.725095 |
| 40 | 7 | 0 | -3.097813  | 0.404443  | -1.578857 |
| 41 | 6 | 0 | -1.886583  | -0.240294 | -1.706113 |
| 42 | 6 | 0 | -0.954891  | 3.322500  | -1.924913 |
| 43 | 6 | 0 | -3.665584  | 2.628289  | -0.582777 |
| 44 | 6 | 0 | -4.566476  | 3.658345  | -0.843750 |
| 45 | 6 | 0 | -5.124517  | 4.389203  | 0.205071  |
| 46 | 6 | 0 | -4.784470  | 4.086982  | 1.520151  |
| 47 | 6 | 0 | -3.877846  | 3.059000  | 1.783461  |
| 48 | 6 | 0 | -3.316456  | 2.334712  | 0.737096  |
| 49 | 6 | 0 | -4.352357  | -0.257490 | -1.514875 |
| 50 | 6 | 0 | -4.461727  | -1.588013 | -1.071598 |
| 51 | 6 | 0 | -5.701787  | -2.197238 | -0.991198 |
| 52 | 6 | 0 | -6.867059  | -1.509212 | -1.345680 |
| 53 | 6 | 0 | -6.767616  | -0.191497 | -1.787583 |
| 54 | 6 | 0 | -5.518520  | 0.422118  | -1.868893 |
| 55 | 8 | 0 | -1.720541  | -1.444765 | -1.759542 |
| 56 | 8 | 0 | -8.030462  | -2.199344 | -1.226919 |
| 57 | 1 | 0 | -3.510550  | 2.154513  | -2.665791 |
| 58 | 1 | 0 | 0.741386   | 4.061580  | 0.572095  |
| 59 | 1 | 0 | -0.674581  | 3.106052  | 1.316867  |
| 60 | 1 | 0 | 0.124735   | 3.392967  | -2.015783 |
| 61 | 1 | 0 | -1.535224  | 4.240406  | -1.902756 |
| 62 | 1 | 0 | 2.442595   | 1.860513  | -0.727316 |
| 63 | 1 | 0 | -4.837401  | 3.890461  | -1.871946 |
| 64 | 1 | 0 | -5.827081  | 5.188763  | -0.008156 |
| 65 | 1 | 0 | -5.221366  | 4.650554  | 2.338602  |
| 66 | 1 | 0 | -3.603273  | 2.822841  | 2.807188  |
| 67 | 1 | 0 | -2.580226  | 1.559658  | 0.942310  |
| 68 | 1 | 0 | 3.162175   | 4.118761  | -0.912915 |
| 69 | 1 | 0 | 4.563458   | 5.988738  | -0.082188 |
| 70 | 1 | 0 | 5.609612   | 5.850701  | 2.165830  |
| 71 | 1 | 0 | 5.240242   | 3.842088  | 3.576448  |
| 72 | 1 | 0 | 3.823435   | 1.984818  | 2.748939  |
| 73 | 1 | 0 | 4.552706   | 1.584869  | -0.952887 |
| 74 | 1 | 0 | 6.587396   | 0.562414  | -1.852850 |
| 75 | 1 | 0 | 5.967314   | -2.879922 | 0.634170  |
| 76 | 1 | 0 | 3.942599   | -1.869948 | 1.540189  |
| 77 | 1 | 0 | -3.575831  | -2.146515 | -0.804815 |
| 78 | 1 | 0 | -5.788420  | -3.224203 | -0.651093 |
| 79 | 1 | 0 | -7.646278  | 0.375607  | -2.070017 |
| 80 | 1 | 0 | -5.479287  | 1.449241  | -2.209369 |
| 81 | 1 | 0 | 0.190562   | -1.529023 | -0.425219 |
| 82 | 1 | 0 | 1.825542   | -3.379831 | -0.405108 |
| 83 | 1 | 0 | 4.114630   | -1.421836 | -3.470375 |
| 84 | 1 | 0 | 2.533363   | 0.473631  | -3.407330 |
| 85 | 1 | 0 | -2.794515  | -0.686089 | 0.838003  |
| 86 | 1 | 0 | -3.890596  | -2.722770 | 1.754730  |
| 87 | 1 | 0 | -0.753221  | -3.047030 | 4.677389  |
| 88 | 1 | 0 | 0.353876   | -1.083726 | 3.715790  |
| 89 | 6 | 0 | -2.519035  | -4.828629 | 4.797525  |
| 90 | 1 | 0 | -3.197129  | -5.659647 | 4.988364  |
| 91 | 1 | 0 | -1.522126  | -5.216598 | 4.560280  |
| 92 | 1 | 0 | -2.458987  | -4.194214 | 5.689085  |
| 93 | 6 | 0 | -9.223121  | -1.526353 | -1.580893 |
| 94 | 1 | 0 | -10.032064 | -2.237771 | -1.418795 |
| 95 | 1 | 0 | -9.381390  | -0.643349 | -0.951258 |

|     |   |   |           |           |           |
|-----|---|---|-----------|-----------|-----------|
| 96  | 1 | 0 | -9.209018 | -1.222824 | -2.633964 |
| 97  | 6 | 0 | 8.047307  | -2.941152 | -0.783879 |
| 98  | 1 | 0 | 8.961214  | -3.138823 | -1.343146 |
| 99  | 1 | 0 | 8.277606  | -2.872442 | 0.285313  |
| 100 | 1 | 0 | 7.336672  | -3.760017 | -0.946677 |
| 101 | 6 | 0 | 4.952379  | -3.689871 | -2.779205 |
| 102 | 1 | 0 | 5.446043  | -4.643703 | -2.591408 |
| 103 | 1 | 0 | 4.610427  | -3.657069 | -3.820153 |
| 104 | 1 | 0 | 5.658291  | -2.869283 | -2.603228 |

-----  
**RCf<sub>homo</sub>-EXO**  
 -----

| Center<br>Number | Atomic<br>Number | Atomic<br>Type | Coordinates (Angstroms) |           |           |
|------------------|------------------|----------------|-------------------------|-----------|-----------|
|                  |                  |                | X                       | Y         | Z         |
| 1                | 6                | 0              | -4.736232               | -2.643454 | 1.188811  |
| 2                | 6                | 0              | -3.422702               | -2.992966 | 0.874029  |
| 3                | 6                | 0              | -3.197431               | -3.865339 | -0.201069 |
| 4                | 6                | 0              | -4.249132               | -4.306995 | -0.986177 |
| 5                | 6                | 0              | -5.561933               | -3.934514 | -0.675383 |
| 6                | 6                | 0              | -5.803484               | -3.112624 | 0.428279  |
| 7                | 7                | 0              | -2.306660               | -2.617896 | 1.647644  |
| 8                | 6                | 0              | -2.037600               | -1.419966 | 1.981744  |
| 9                | 6                | 0              | -0.872708               | -1.054712 | 2.805984  |
| 10               | 6                | 0              | -0.788333               | 0.462750  | 2.878348  |
| 11               | 7                | 0              | -1.886495               | 0.894235  | 2.007016  |
| 12               | 6                | 0              | -2.704332               | -0.121795 | 1.567597  |
| 13               | 6                | 0              | -0.056985               | -1.925371 | 3.394281  |
| 14               | 8                | 0              | -3.745765               | 0.011753  | 0.955097  |
| 15               | 6                | 0              | -2.161174               | 2.267051  | 1.777879  |
| 16               | 6                | 0              | -1.745962               | 3.236793  | 2.698527  |
| 17               | 6                | 0              | -1.977045               | 4.579975  | 2.450240  |
| 18               | 6                | 0              | -2.623602               | 4.984091  | 1.277306  |
| 19               | 6                | 0              | -3.030813               | 4.021155  | 0.352792  |
| 20               | 6                | 0              | -2.795686               | 2.672059  | 0.603638  |
| 21               | 6                | 0              | 0.568896                | 1.017973  | 2.483866  |
| 22               | 6                | 0              | 1.587280                | 1.047980  | 3.439292  |
| 23               | 6                | 0              | 2.857665                | 1.513031  | 3.105685  |
| 24               | 6                | 0              | 3.115958                | 1.971836  | 1.814817  |
| 25               | 6                | 0              | 2.097852                | 1.961907  | 0.862598  |
| 26               | 6                | 0              | 0.830574                | 1.486330  | 1.195673  |
| 27               | 8                | 0              | -2.800544               | 6.322881  | 1.124641  |
| 28               | 8                | 0              | -6.529637               | -4.429476 | -1.491802 |
| 29               | 7                | 0              | -0.509870               | -0.829905 | -0.893742 |
| 30               | 6                | 0              | -1.317638               | 0.070728  | -1.603853 |
| 31               | 6                | 0              | -0.976699               | 1.372519  | -2.025643 |
| 32               | 6                | 0              | -1.915607               | 2.178335  | -2.642644 |
| 33               | 6                | 0              | -3.220972               | 1.718174  | -2.862221 |
| 34               | 6                | 0              | -3.580124               | 0.433991  | -2.444385 |
| 35               | 6                | 0              | -2.635766               | -0.360407 | -1.803694 |
| 36               | 8                | 0              | -4.063761               | 2.595342  | -3.462127 |
| 37               | 6                | 0              | 0.762072                | -0.894412 | -0.815464 |
| 38               | 6                | 0              | 1.443310                | -1.864893 | 0.060240  |
| 39               | 6                | 0              | 2.879902                | -1.413272 | 0.221755  |
| 40               | 7                | 0              | 3.054490                | -0.508848 | -0.922601 |
| 41               | 6                | 0              | 1.875264                | -0.126910 | -1.515802 |
| 42               | 6                | 0              | 0.901301                | -2.954050 | 0.597292  |
| 43               | 6                | 0              | 3.876911                | -2.547501 | 0.256888  |
| 44               | 6                | 0              | 4.387835                | -2.974244 | 1.481314  |
| 45               | 6                | 0              | 5.261265                | -4.059425 | 1.540882  |
| 46               | 6                | 0              | 5.634231                | -4.715131 | 0.371209  |
| 47               | 6                | 0              | 5.128255                | -4.286886 | -0.856712 |
| 48               | 6                | 0              | 4.249382                | -3.210847 | -0.913709 |
| 49               | 6                | 0              | 4.303579                | 0.103741  | -1.193222 |
| 50               | 6                | 0              | 4.626932                | 0.553478  | -2.482126 |
| 51               | 6                | 0              | 5.854056                | 1.147202  | -2.722484 |
| 52               | 6                | 0              | 6.792181                | 1.296050  | -1.695021 |
| 53               | 6                | 0              | 6.483895                | 0.834356  | -0.415531 |
| 54               | 6                | 0              | 5.245374                | 0.242375  | -0.173934 |
| 55               | 8                | 0              | 1.775357                | 0.658204  | -2.443304 |
| 56               | 8                | 0              | 7.965125                | 1.888454  | -2.038853 |
| 57               | 1                | 0              | 2.958259                | -0.829759 | 1.153671  |
| 58               | 1                | 0              | -0.242692               | -2.989502 | 3.283904  |
| 59               | 1                | 0              | 0.802985                | -1.613788 | 3.979181  |

|     |   |   |           |           |           |
|-----|---|---|-----------|-----------|-----------|
| 60  | 1 | 0 | -0.151987 | -3.169700 | 0.447594  |
| 61  | 1 | 0 | 1.488618  | -3.634320 | 1.207628  |
| 62  | 1 | 0 | -1.001706 | 0.778342  | 3.909421  |
| 63  | 1 | 0 | 4.101469  | -2.450954 | 2.391695  |
| 64  | 1 | 0 | 5.653887  | -4.385459 | 2.498965  |
| 65  | 1 | 0 | 6.319690  | -5.555732 | 0.413218  |
| 66  | 1 | 0 | 5.419767  | -4.793920 | -1.771219 |
| 67  | 1 | 0 | 3.853124  | -2.873839 | -1.868295 |
| 68  | 1 | 0 | 1.382653  | 0.719418  | 4.455795  |
| 69  | 1 | 0 | 3.638998  | 1.533462  | 3.859151  |
| 70  | 1 | 0 | 4.100759  | 2.345647  | 1.552342  |
| 71  | 1 | 0 | 2.290598  | 2.322711  | -0.145015 |
| 72  | 1 | 0 | 0.029404  | 1.502130  | 0.462354  |
| 73  | 1 | 0 | -1.228210 | 2.949692  | 3.607843  |
| 74  | 1 | 0 | -1.655791 | 5.339294  | 3.155198  |
| 75  | 1 | 0 | -3.518926 | 4.297205  | -0.575172 |
| 76  | 1 | 0 | -3.105954 | 1.932164  | -0.122672 |
| 77  | 1 | 0 | 3.913205  | 0.440955  | -3.286446 |
| 78  | 1 | 0 | 6.113228  | 1.500138  | -3.715135 |
| 79  | 1 | 0 | 7.190909  | 0.922498  | 0.400546  |
| 80  | 1 | 0 | 5.024512  | -0.111471 | 0.827244  |
| 81  | 1 | 0 | 0.022460  | 1.753586  | -1.869106 |
| 82  | 1 | 0 | -1.663646 | 3.186850  | -2.954319 |
| 83  | 1 | 0 | -4.586828 | 0.056843  | -2.577665 |
| 84  | 1 | 0 | -2.916749 | -1.340505 | -1.429343 |
| 85  | 1 | 0 | -2.180432 | -4.170510 | -0.428224 |
| 86  | 1 | 0 | -4.080778 | -4.958657 | -1.837114 |
| 87  | 1 | 0 | -6.811441 | -2.824394 | 0.701845  |
| 88  | 1 | 0 | -4.925677 | -1.994910 | 2.036609  |
| 89  | 6 | 0 | -7.867063 | -4.067679 | -1.208945 |
| 90  | 1 | 0 | -8.478890 | -4.548568 | -1.971486 |
| 91  | 1 | 0 | -8.173380 | -4.422565 | -0.218227 |
| 92  | 1 | 0 | -8.003515 | -2.981478 | -1.261876 |
| 93  | 6 | 0 | -3.423022 | 6.761508  | -0.067548 |
| 94  | 1 | 0 | -3.464349 | 7.848428  | -0.005652 |
| 95  | 1 | 0 | -2.842394 | 6.466980  | -0.949214 |
| 96  | 1 | 0 | -4.439602 | 6.361316  | -0.154444 |
| 97  | 6 | 0 | 8.932230  | 2.054623  | -1.020314 |
| 98  | 1 | 0 | 9.784527  | 2.545493  | -1.488767 |
| 99  | 1 | 0 | 8.548739  | 2.683854  | -0.208922 |
| 100 | 1 | 0 | 9.247096  | 1.087845  | -0.611121 |
| 101 | 6 | 0 | -5.400241 | 2.176511  | -3.670949 |
| 102 | 1 | 0 | -5.906146 | 3.011055  | -4.154986 |
| 103 | 1 | 0 | -5.441053 | 1.296312  | -4.321940 |
| 104 | 1 | 0 | -5.894669 | 1.948655  | -2.720106 |

-----  
**RC<sub>hetero-EXO</sub>**  
 -----

| Center Number | Atomic Number | Atomic Type | Coordinates (Angstroms) |           |           |
|---------------|---------------|-------------|-------------------------|-----------|-----------|
|               |               |             | X                       | Y         | Z         |
| 1             | 6             | 0           | 5.446314                | -2.260833 | -0.533290 |
| 2             | 6             | 0           | 4.673573                | -1.286023 | -1.160660 |
| 3             | 6             | 0           | 5.314897                | -0.206742 | -1.786333 |
| 4             | 6             | 0           | 6.696688                | -0.131240 | -1.793876 |
| 5             | 6             | 0           | 7.471265                | -1.116203 | -1.170615 |
| 6             | 6             | 0           | 6.837917                | -2.183211 | -0.534242 |
| 7             | 7             | 0           | 3.258082                | -1.364073 | -1.121641 |
| 8             | 6             | 0           | 2.562723                | -2.103698 | -0.059751 |
| 9             | 6             | 0           | 1.086426                | -1.901336 | -0.390115 |
| 10            | 6             | 0           | 1.012576                | -1.210539 | -1.691334 |
| 11            | 6             | 0           | 2.432215                | -0.871177 | -2.097111 |
| 12            | 7             | 0           | 0.059543                | -0.857104 | -2.453651 |
| 13            | 6             | 0           | -1.271686               | -1.274544 | -2.208557 |
| 14            | 6             | 0           | -2.244417               | -0.371195 | -1.763699 |
| 15            | 6             | 0           | -3.571203               | -0.764094 | -1.652597 |
| 16            | 6             | 0           | -3.960143               | -2.054983 | -2.026567 |
| 17            | 6             | 0           | -2.990879               | -2.968793 | -2.445214 |
| 18            | 6             | 0           | -1.656298               | -2.575893 | -2.529660 |
| 19            | 8             | 0           | -5.295299               | -2.324584 | -1.977061 |
| 20            | 6             | 0           | 0.080536                | -2.247647 | 0.413310  |
| 21            | 6             | 0           | 2.963939                | -1.654378 | 1.332204  |
| 22            | 6             | 0           | 2.928128                | -2.571151 | 2.384009  |
| 23            | 6             | 0           | 3.302307                | -2.185297 | 3.670087  |



|    |   |   |           |           |           |
|----|---|---|-----------|-----------|-----------|
| 24 | 6 | 0 | 3.742850  | -0.884772 | 3.905974  |
| 25 | 6 | 0 | 3.782352  | 0.031943  | 2.855920  |
| 26 | 6 | 0 | 3.379925  | -0.345158 | 1.577910  |
| 27 | 8 | 0 | 2.759150  | -0.289908 | -3.114160 |
| 28 | 8 | 0 | 8.817034  | -0.943685 | -1.231377 |
| 29 | 6 | 0 | 0.269734  | -0.168512 | 3.127800  |
| 30 | 6 | 0 | -0.582485 | 0.583660  | 2.435266  |
| 31 | 6 | 0 | -1.904624 | 0.148625  | 1.949674  |
| 32 | 6 | 0 | -2.503759 | 1.329918  | 1.203291  |
| 33 | 7 | 0 | -1.571387 | 2.335559  | 1.250058  |
| 34 | 6 | 0 | -0.356241 | 2.022471  | 2.016793  |
| 35 | 7 | 0 | -2.307653 | -1.050437 | 2.111018  |
| 36 | 6 | 0 | -3.515108 | -1.623879 | 1.700717  |
| 37 | 6 | 0 | -4.760566 | -0.986394 | 1.660356  |
| 38 | 6 | 0 | -5.894990 | -1.672134 | 1.245498  |
| 39 | 6 | 0 | -5.799426 | -3.011517 | 0.857474  |
| 40 | 6 | 0 | -4.572445 | -3.677308 | 0.951213  |
| 41 | 6 | 0 | -3.454255 | -2.993375 | 1.391117  |
| 42 | 8 | 0 | -6.841353 | -3.744688 | 0.392556  |
| 43 | 6 | 0 | 0.897826  | 2.244002  | 1.193719  |
| 44 | 6 | 0 | 1.996963  | 2.899593  | 1.743412  |
| 45 | 6 | 0 | 3.135211  | 3.136195  | 0.971626  |
| 46 | 6 | 0 | 3.170450  | 2.729625  | -0.359730 |
| 47 | 6 | 0 | 2.072560  | 2.066807  | -0.913697 |
| 48 | 6 | 0 | 0.948001  | 1.815208  | -0.134037 |
| 49 | 6 | 0 | -1.735759 | 3.604816  | 0.635110  |
| 50 | 6 | 0 | -1.109073 | 4.728264  | 1.190763  |
| 51 | 6 | 0 | -1.230316 | 5.969957  | 0.592126  |
| 52 | 6 | 0 | -1.981037 | 6.121753  | -0.578393 |
| 53 | 6 | 0 | -2.603185 | 5.006814  | -1.140344 |
| 54 | 6 | 0 | -2.474692 | 3.756665  | -0.538389 |
| 55 | 8 | 0 | -3.580854 | 1.394454  | 0.634690  |
| 56 | 8 | 0 | -2.041491 | 7.378500  | -1.088617 |
| 57 | 1 | 0 | 2.793998  | -3.173503 | -0.158716 |
| 58 | 1 | 0 | -0.000757 | -1.187312 | 3.388127  |
| 59 | 1 | 0 | 1.241313  | 0.200209  | 3.440322  |
| 60 | 1 | 0 | -0.955321 | -2.097027 | 0.135401  |
| 61 | 1 | 0 | 0.274184  | -2.682512 | 1.390916  |
| 62 | 1 | 0 | -0.312622 | 2.658298  | 2.910197  |
| 63 | 1 | 0 | 2.621977  | -3.597883 | 2.193982  |
| 64 | 1 | 0 | 3.270513  | -2.906905 | 4.480424  |
| 65 | 1 | 0 | 4.056987  | -0.588519 | 4.902029  |
| 66 | 1 | 0 | 4.120998  | 1.049496  | 3.028301  |
| 67 | 1 | 0 | 3.409870  | 0.374551  | 0.764649  |
| 68 | 1 | 0 | 1.958637  | 3.241554  | 2.775631  |
| 69 | 1 | 0 | 3.984654  | 3.653539  | 1.407130  |
| 70 | 1 | 0 | 4.047348  | 2.931414  | -0.967346 |
| 71 | 1 | 0 | 2.089646  | 1.748558  | -1.951581 |
| 72 | 1 | 0 | 0.089138  | 1.306208  | -0.566370 |
| 73 | 1 | 0 | -0.517082 | 4.637842  | 2.094926  |
| 74 | 1 | 0 | -0.745517 | 6.842438  | 1.016883  |
| 75 | 1 | 0 | -3.184770 | 5.088913  | -2.050602 |
| 76 | 1 | 0 | -2.964265 | 2.901449  | -0.984308 |
| 77 | 1 | 0 | 4.726439  | 0.560121  | -2.272023 |
| 78 | 1 | 0 | 7.203744  | 0.697230  | -2.277197 |
| 79 | 1 | 0 | 7.406110  | -2.957551 | -0.033452 |
| 80 | 1 | 0 | 4.974291  | -3.092671 | -0.021663 |
| 81 | 1 | 0 | -1.960588 | 0.648881  | -1.517892 |
| 82 | 1 | 0 | -4.319867 | -0.072359 | -1.282366 |
| 83 | 1 | 0 | -3.257449 | -3.981965 | -2.721528 |
| 84 | 1 | 0 | -0.905074 | -3.280621 | -2.873723 |
| 85 | 1 | 0 | -2.499705 | -3.502650 | 1.484675  |
| 86 | 1 | 0 | -4.524510 | -4.727779 | 0.682293  |
| 87 | 1 | 0 | -6.844032 | -1.150476 | 1.216599  |
| 88 | 1 | 0 | -4.842844 | 0.051741  | 1.951505  |
| 89 | 6 | 0 | 9.626515  | -1.922792 | -0.609215 |
| 90 | 1 | 0 | 10.657588 | -1.609829 | -0.769537 |
| 91 | 1 | 0 | 9.424603  | -1.978329 | 0.466617  |
| 92 | 1 | 0 | 9.470183  | -2.910055 | -1.058724 |
| 93 | 6 | 0 | -8.043890 | -3.053078 | 0.109521  |
| 94 | 1 | 0 | -8.710301 | -3.781232 | -0.352776 |
| 95 | 1 | 0 | -8.507337 | -2.667530 | 1.024339  |
| 96 | 1 | 0 | -7.858781 | -2.224694 | -0.584358 |
| 97 | 6 | 0 | -5.705762 | -3.599122 | -2.429599 |

|     |   |   |           |           |           |
|-----|---|---|-----------|-----------|-----------|
| 98  | 1 | 0 | -6.794230 | -3.607708 | -2.376546 |
| 99  | 1 | 0 | -5.387733 | -3.769537 | -3.464997 |
| 100 | 1 | 0 | -5.309903 | -4.394168 | -1.787005 |
| 101 | 6 | 0 | -2.770443 | 7.559058  | -2.287928 |
| 102 | 1 | 0 | -2.692223 | 8.617654  | -2.532936 |
| 103 | 1 | 0 | -2.345264 | 6.962517  | -3.102923 |
| 104 | 1 | 0 | -3.824863 | 7.291733  | -2.154724 |

-----  
**TSf<sub>homo</sub>**

| Center<br>Number | Atomic<br>Number | Atomic<br>Type | Coordinates (Angstroms) |           |           |
|------------------|------------------|----------------|-------------------------|-----------|-----------|
|                  |                  |                | X                       | Y         | Z         |
| 1                | 6                | 0              | -4.096823               | -1.768524 | -1.096882 |
| 2                | 6                | 0              | -3.949165               | -0.414377 | -0.774373 |
| 3                | 6                | 0              | -5.006007               | 0.230113  | -0.113957 |
| 4                | 6                | 0              | -6.139802               | -0.471149 | 0.263306  |
| 5                | 6                | 0              | -6.254347               | -1.835256 | -0.009736 |
| 6                | 6                | 0              | -5.235080               | -2.472449 | -0.713999 |
| 7                | 7                | 0              | -2.756943               | 0.301878  | -1.054308 |
| 8                | 6                | 0              | -2.639575               | 1.723458  | -0.706932 |
| 9                | 6                | 0              | -1.190851               | 2.018897  | -0.987271 |
| 10               | 6                | 0              | -0.524458               | 0.830109  | -1.404089 |
| 11               | 6                | 0              | -1.570782               | -0.260079 | -1.475269 |
| 12               | 7                | 0              | 0.751329                | 0.842147  | -1.625087 |
| 13               | 6                | 0              | 1.615088                | -0.216974 | -1.894073 |
| 14               | 6                | 0              | 2.798198                | 0.135317  | -2.561499 |
| 15               | 6                | 0              | 3.799135                | -0.791397 | -2.829954 |
| 16               | 6                | 0              | 3.657178                | -2.099640 | -2.364562 |
| 17               | 6                | 0              | 2.491076                | -2.465822 | -1.674504 |
| 18               | 6                | 0              | 1.482012                | -1.550056 | -1.450531 |
| 19               | 8                | 0              | 4.584910                | -3.076020 | -2.526508 |
| 20               | 6                | 0              | 5.752387                | -2.745542 | -3.257259 |
| 21               | 6                | 0              | -0.519964               | 3.221782  | -0.849311 |
| 22               | 6                | 0              | -3.564315               | 2.620338  | -1.512146 |
| 23               | 6                | 0              | -4.083918               | 3.773017  | -0.923366 |
| 24               | 6                | 0              | -4.878747               | 4.645735  | -1.664097 |
| 25               | 6                | 0              | -5.163727               | 4.364411  | -2.997767 |
| 26               | 6                | 0              | -4.649802               | 3.209819  | -3.587213 |
| 27               | 6                | 0              | -3.850177               | 2.342550  | -2.849105 |
| 28               | 8                | 0              | -1.405044               | -1.404689 | -1.861935 |
| 29               | 8                | 0              | -7.378313               | -2.452034 | 0.450234  |
| 30               | 6                | 0              | -7.417361               | -3.862922 | 0.349416  |
| 31               | 6                | 0              | 0.520009                | 3.222172  | 0.848100  |
| 32               | 6                | 0              | 1.190915                | 2.019357  | 0.986568  |
| 33               | 6                | 0              | 0.524534                | 0.830721  | 1.403829  |
| 34               | 6                | 0              | 1.570833                | -0.259475 | 1.475239  |
| 35               | 7                | 0              | 2.756985                | 0.302337  | 1.054060  |
| 36               | 6                | 0              | 2.639648                | 1.723838  | 0.706381  |
| 37               | 7                | 0              | -0.751236               | 0.842864  | 1.624915  |
| 38               | 6                | 0              | -1.615040               | -0.216122 | 1.894260  |
| 39               | 6                | 0              | -1.482086               | -1.549330 | 1.451066  |
| 40               | 6                | 0              | -2.491228               | -2.464950 | 1.675289  |
| 41               | 6                | 0              | -3.657286               | -2.098484 | 2.365272  |
| 42               | 6                | 0              | -3.799093               | -0.790125 | 2.830387  |
| 43               | 6                | 0              | -2.798089               | 0.136436  | 2.561660  |
| 44               | 8                | 0              | 1.405076                | -1.403982 | 1.862205  |
| 45               | 6                | 0              | 3.949207                | -0.413985 | 0.774299  |
| 46               | 6                | 0              | 4.096760                | -1.768120 | 1.096891  |
| 47               | 6                | 0              | 5.235053                | -2.472101 | 0.714222  |
| 48               | 6                | 0              | 6.254449                | -1.834993 | 0.010075  |
| 49               | 6                | 0              | 6.139983                | -0.470904 | -0.263093 |
| 50               | 6                | 0              | 5.006163                | 0.230422  | 0.113975  |
| 51               | 6                | 0              | 3.564314                | 2.620872  | 1.511521  |
| 52               | 6                | 0              | 4.084006                | 3.773434  | 0.922590  |
| 53               | 6                | 0              | 4.878759                | 4.646275  | 1.663259  |
| 54               | 6                | 0              | 5.163575                | 4.365192  | 2.997016  |
| 55               | 6                | 0              | 4.649563                | 3.210715  | 3.586612  |
| 56               | 6                | 0              | 3.850015                | 2.343325  | 2.848565  |
| 57               | 8                | 0              | 7.378463                | -2.451855 | -0.449678 |
| 58               | 6                | 0              | 7.417444                | -3.862734 | -0.348688 |
| 59               | 8                | 0              | -4.585111               | -3.074729 | 2.527453  |
| 60               | 6                | 0              | -5.752610               | -2.743961 | 3.258031  |
| 61               | 1                | 0              | -2.846654               | 1.846529  | 0.367046  |

|     |   |   |           |           |           |
|-----|---|---|-----------|-----------|-----------|
| 62  | 1 | 0 | 1.095199  | 4.129038  | 0.677943  |
| 63  | 1 | 0 | -0.371933 | 3.328154  | 1.459500  |
| 64  | 1 | 0 | 0.371968  | 3.327512  | -1.460772 |
| 65  | 1 | 0 | -1.095172 | 4.128709  | -0.679543 |
| 66  | 1 | 0 | 2.846818  | 1.846689  | -0.367602 |
| 67  | 1 | 0 | -3.870573 | 3.983796  | 0.122799  |
| 68  | 1 | 0 | -5.280683 | 5.539074  | -1.196302 |
| 69  | 1 | 0 | -5.788001 | 5.038815  | -3.575313 |
| 70  | 1 | 0 | -4.873327 | 2.983778  | -4.625202 |
| 71  | 1 | 0 | -3.451866 | 1.440713  | -3.306678 |
| 72  | 1 | 0 | 3.870798  | 3.984028  | -0.123639 |
| 73  | 1 | 0 | 5.280766  | 5.539522  | 1.195350  |
| 74  | 1 | 0 | 5.787790  | 5.039693  | 3.574511  |
| 75  | 1 | 0 | 4.872962  | 2.984856  | 4.624667  |
| 76  | 1 | 0 | 3.451639  | 1.441578  | 3.306258  |
| 77  | 1 | 0 | 4.946464  | 1.281887  | -0.138312 |
| 78  | 1 | 0 | 6.946364  | 0.026834  | -0.792501 |
| 79  | 1 | 0 | 5.297608  | -3.525731 | 0.959103  |
| 80  | 1 | 0 | 3.308635  | -2.285217 | 1.621588  |
| 81  | 1 | 0 | -3.308806 | -2.285673 | -1.621690 |
| 82  | 1 | 0 | -5.297718 | -3.526090 | -0.958816 |
| 83  | 1 | 0 | -6.946100 | 0.026655  | 0.792780  |
| 84  | 1 | 0 | -4.946234 | 1.281593  | 0.138251  |
| 85  | 1 | 0 | 0.589517  | -1.855800 | -0.921694 |
| 86  | 1 | 0 | 2.409052  | -3.484175 | -1.308300 |
| 87  | 1 | 0 | 4.692833  | -0.475265 | -3.354380 |
| 88  | 1 | 0 | 2.910637  | 1.166027  | -2.885798 |
| 89  | 1 | 0 | -2.910423 | 1.167235  | 2.885709  |
| 90  | 1 | 0 | -4.692741 | -0.473794 | 3.354781  |
| 91  | 1 | 0 | -2.409311 | -3.483397 | 1.309325  |
| 92  | 1 | 0 | -0.589627 | -1.855281 | 0.922285  |
| 93  | 1 | 0 | -8.323920 | -4.180187 | 0.864684  |
| 94  | 1 | 0 | -7.462351 | -4.187128 | -0.696566 |
| 95  | 1 | 0 | -6.539527 | -4.311042 | 0.830436  |
| 96  | 1 | 0 | -6.349599 | -3.655023 | 3.302969  |
| 97  | 1 | 0 | -5.500138 | -2.422154 | 4.274788  |
| 98  | 1 | 0 | -6.324808 | -1.958982 | 2.751500  |
| 99  | 1 | 0 | 6.349237  | -3.656700 | -3.302122 |
| 100 | 1 | 0 | 5.499860  | -2.423864 | -4.274043 |
| 101 | 1 | 0 | 6.324751  | -1.960563 | -2.750913 |
| 102 | 1 | 0 | 8.324042  | -4.180098 | -0.863826 |
| 103 | 1 | 0 | 7.462310  | -4.186811 | 0.697339  |
| 104 | 1 | 0 | 6.539636  | -4.310873 | -0.829740 |

-----  
**TSf<sub>hetero</sub>**  
 -----

| Center<br>Number | Atomic<br>Number | Atomic<br>Type | Coordinates (Angstroms) |           |           |
|------------------|------------------|----------------|-------------------------|-----------|-----------|
|                  |                  |                | X                       | Y         | Z         |
| 1                | 6                | 0              | -0.728722               | -0.817762 | 3.303472  |
| 2                | 6                | 0              | -1.176917               | -0.624959 | 1.993611  |
| 3                | 6                | 0              | -2.197506               | -1.458752 | 1.511748  |
| 4                | 6                | 0              | -2.713937               | -2.479875 | 2.292689  |
| 5                | 6                | 0              | -2.250549               | -2.668683 | 3.597867  |
| 6                | 6                | 0              | -1.258430               | -1.824120 | 4.104622  |
| 7                | 7                | 0              | -0.761689               | 0.457559  | 1.197811  |
| 8                | 6                | 0              | 0.470726                | 0.748125  | 0.976257  |
| 9                | 6                | 0              | 0.890213                | 1.924400  | 0.265362  |
| 10               | 6                | 0              | 2.371789                | 1.844047  | -0.006067 |
| 11               | 7                | 0              | 2.759466                | 0.572631  | 0.618588  |
| 12               | 6                | 0              | 1.719073                | -0.069419 | 1.254516  |
| 13               | 6                | 0              | 0.064482                | 3.022122  | 0.051139  |
| 14               | 8                | 0              | 1.772972                | -1.115749 | 1.872534  |
| 15               | 6                | 0              | 4.027988                | -0.002526 | 0.351177  |
| 16               | 6                | 0              | 4.929651                | 0.671300  | -0.489069 |
| 17               | 6                | 0              | 6.134920                | 0.091167  | -0.845891 |
| 18               | 6                | 0              | 6.482357                | -1.175047 | -0.369175 |
| 19               | 6                | 0              | 5.610021                | -1.838457 | 0.490585  |
| 20               | 6                | 0              | 4.396758                | -1.255713 | 0.851627  |
| 21               | 6                | 0              | 3.128308                | 3.042980  | 0.537184  |
| 22               | 6                | 0              | 3.388189                | 4.123201  | -0.306668 |
| 23               | 6                | 0              | 4.018525                | 5.265339  | 0.183618  |
| 24               | 6                | 0              | 4.400301                | 5.328082  | 1.521342  |
| 25               | 6                | 0              | 4.146760                | 4.247537  | 2.365615  |

|    |   |   |            |           |           |
|----|---|---|------------|-----------|-----------|
| 26 | 6 | 0 | 3.509427   | 3.110745  | 1.877311  |
| 27 | 8 | 0 | 7.672846   | -1.676878 | -0.803385 |
| 28 | 8 | 0 | -2.827788  | -3.683521 | 4.296814  |
| 29 | 7 | 0 | 0.500667   | 0.500912  | -1.993587 |
| 30 | 6 | 0 | 1.289848   | -0.647789 | -1.942419 |
| 31 | 6 | 0 | 1.043615   | -1.785870 | -1.146329 |
| 32 | 6 | 0 | 1.975484   | -2.802480 | -1.082070 |
| 33 | 6 | 0 | 3.163171   | -2.738149 | -1.828700 |
| 34 | 6 | 0 | 3.421613   | -1.622583 | -2.626129 |
| 35 | 6 | 0 | 2.500986   | -0.580702 | -2.645931 |
| 36 | 8 | 0 | 4.001821   | -3.794395 | -1.696779 |
| 37 | 6 | 0 | -0.795877  | 0.569702  | -1.913816 |
| 38 | 6 | 0 | -1.434181  | 1.829849  | -1.840507 |
| 39 | 6 | 0 | -2.922088  | 1.649506  | -1.694420 |
| 40 | 7 | 0 | -3.069724  | 0.191768  | -1.653272 |
| 41 | 6 | 0 | -1.877398  | -0.482687 | -1.845585 |
| 42 | 6 | 0 | -0.706591  | 3.004929  | -1.734205 |
| 43 | 6 | 0 | -3.488498  | 2.396662  | -0.500254 |
| 44 | 6 | 0 | -3.854966  | 3.734327  | -0.664810 |
| 45 | 6 | 0 | -4.298911  | 4.482820  | 0.423001  |
| 46 | 6 | 0 | -4.392542  | 3.891603  | 1.680788  |
| 47 | 6 | 0 | -4.046891  | 2.550996  | 1.842302  |
| 48 | 6 | 0 | -3.594715  | 1.804861  | 0.757132  |
| 49 | 6 | 0 | -4.353026  | -0.411296 | -1.616513 |
| 50 | 6 | 0 | -4.520745  | -1.782497 | -1.352289 |
| 51 | 6 | 0 | -5.790559  | -2.331324 | -1.292449 |
| 52 | 6 | 0 | -6.927760  | -1.542091 | -1.488153 |
| 53 | 6 | 0 | -6.770843  | -0.181851 | -1.746990 |
| 54 | 6 | 0 | -5.493296  | 0.371881  | -1.808214 |
| 55 | 8 | 0 | -1.746612  | -1.686756 | -1.971464 |
| 56 | 8 | 0 | -8.124171  | -2.181332 | -1.405851 |
| 57 | 1 | 0 | -3.413236  | 2.026524  | -2.604268 |
| 58 | 1 | 0 | 0.544194   | 3.989993  | -0.081973 |
| 59 | 1 | 0 | -0.863270  | 3.035684  | 0.619143  |
| 60 | 1 | 0 | 0.257612   | 3.006237  | -2.236966 |
| 61 | 1 | 0 | -1.236009  | 3.954391  | -1.714469 |
| 62 | 1 | 0 | 2.538913   | 1.767495  | -1.091739 |
| 63 | 1 | 0 | -3.799268  | 4.191231  | -1.650925 |
| 64 | 1 | 0 | -4.579516  | 5.522272  | 0.284627  |
| 65 | 1 | 0 | -4.742499  | 4.470428  | 2.529785  |
| 66 | 1 | 0 | -4.127121  | 2.079819  | 2.817064  |
| 67 | 1 | 0 | -3.322696  | 0.763652  | 0.886586  |
| 68 | 1 | 0 | 3.100043   | 4.065360  | -1.354931 |
| 69 | 1 | 0 | 4.217844   | 6.100091  | -0.481130 |
| 70 | 1 | 0 | 4.897846   | 6.213266  | 1.904679  |
| 71 | 1 | 0 | 4.446879   | 4.290453  | 3.407981  |
| 72 | 1 | 0 | 3.313329   | 2.267240  | 2.534085  |
| 73 | 1 | 0 | 4.698100   | 1.654025  | -0.880837 |
| 74 | 1 | 0 | 6.825663   | 0.610722  | -1.501802 |
| 75 | 1 | 0 | 5.847594   | -2.820138 | 0.883445  |
| 76 | 1 | 0 | 3.727228   | -1.794716 | 1.503577  |
| 77 | 1 | 0 | -3.658120  | -2.417841 | -1.212380 |
| 78 | 1 | 0 | -5.921971  | -3.389362 | -1.090790 |
| 79 | 1 | 0 | -7.626476  | 0.464693  | -1.899800 |
| 80 | 1 | 0 | -5.409383  | 1.435737  | -1.996059 |
| 81 | 1 | 0 | 0.138481   | -1.847607 | -0.552240 |
| 82 | 1 | 0 | 1.813273   | -3.665444 | -0.444674 |
| 83 | 1 | 0 | 4.341443   | -1.534402 | -3.191530 |
| 84 | 1 | 0 | 2.700717   | 0.310297  | -3.234533 |
| 85 | 1 | 0 | -2.567810  | -1.312134 | 0.502553  |
| 86 | 1 | 0 | -3.490941  | -3.135299 | 1.912255  |
| 87 | 1 | 0 | -0.889086  | -1.939909 | 5.116730  |
| 88 | 1 | 0 | 0.042063   | -0.165216 | 3.700462  |
| 89 | 6 | 0 | -2.373547  | -3.903399 | 5.617062  |
| 90 | 1 | 0 | -2.943379  | -4.750955 | 5.996831  |
| 91 | 1 | 0 | -1.304548  | -4.144918 | 5.634372  |
| 92 | 1 | 0 | -2.556178  | -3.028071 | 6.251340  |
| 93 | 6 | 0 | -9.289014  | -1.403213 | -1.599310 |
| 94 | 1 | 0 | -10.131042 | -2.086813 | -1.496331 |
| 95 | 1 | 0 | -9.366841  | -0.611642 | -0.845141 |
| 96 | 1 | 0 | -9.303840  | -0.953443 | -2.598806 |
| 97 | 6 | 0 | 8.107449   | -2.894792 | -0.229694 |
| 98 | 1 | 0 | 9.088715   | -3.098701 | -0.657193 |
| 99 | 1 | 0 | 8.190941   | -2.809703 | 0.859717  |

|     |   |   |          |           |           |
|-----|---|---|----------|-----------|-----------|
| 100 | 1 | 0 | 7.426376 | -3.718445 | -0.474314 |
| 101 | 6 | 0 | 5.175419 | -3.796804 | -2.487314 |
| 102 | 1 | 0 | 5.686288 | -4.734055 | -2.265877 |
| 103 | 1 | 0 | 4.929980 | -3.758972 | -3.554894 |
| 104 | 1 | 0 | 5.828713 | -2.952906 | -2.235685 |

-----  
**TSf<sub>homo-EXO</sub>**  
 -----

| Center<br>Number | Atomic<br>Number | Atomic<br>Type | Coordinates (Angstroms) |           |           |
|------------------|------------------|----------------|-------------------------|-----------|-----------|
|                  |                  |                | X                       | Y         | Z         |
| 1                | 6                | 0              | 5.001861                | -2.274946 | -1.207663 |
| 2                | 6                | 0              | 3.770188                | -2.798150 | -0.795647 |
| 3                | 6                | 0              | 3.777122                | -3.843494 | 0.146925  |
| 4                | 6                | 0              | 4.958164                | -4.293168 | 0.708928  |
| 5                | 6                | 0              | 6.180857                | -3.745485 | 0.302378  |
| 6                | 6                | 0              | 6.197465                | -2.743797 | -0.672191 |
| 7                | 7                | 0              | 2.529366                | -2.447343 | -1.332583 |
| 8                | 6                | 0              | 2.151531                | -1.248239 | -1.631791 |
| 9                | 6                | 0              | 0.874958                | -0.973155 | -2.209558 |
| 10               | 6                | 0              | 0.743086                | 0.507985  | -2.468709 |
| 11               | 7                | 0              | 1.868425                | 1.057805  | -1.713031 |
| 12               | 6                | 0              | 2.787339                | 0.100979  | -1.334666 |
| 13               | 6                | 0              | -0.082260               | -1.952571 | -2.521573 |
| 14               | 8                | 0              | 3.872851                | 0.322756  | -0.833398 |
| 15               | 6                | 0              | 2.097479                | 2.448962  | -1.582270 |
| 16               | 6                | 0              | 1.648401                | 3.341174  | -2.561486 |
| 17               | 6                | 0              | 1.836660                | 4.704607  | -2.401157 |
| 18               | 6                | 0              | 2.480145                | 5.201593  | -1.262998 |
| 19               | 6                | 0              | 2.924976                | 4.314018  | -0.281338 |
| 20               | 6                | 0              | 2.725462                | 2.945059  | -0.440873 |
| 21               | 6                | 0              | -0.618869               | 1.096552  | -2.158729 |
| 22               | 6                | 0              | -1.610385               | 1.025323  | -3.141321 |
| 23               | 6                | 0              | -2.895228               | 1.501680  | -2.888693 |
| 24               | 6                | 0              | -3.194945               | 2.069383  | -1.651414 |
| 25               | 6                | 0              | -2.201925               | 2.166565  | -0.677841 |
| 26               | 6                | 0              | -0.919785               | 1.683021  | -0.930368 |
| 27               | 8                | 0              | 2.618981                | 6.552823  | -1.200101 |
| 28               | 8                | 0              | 7.290128                | -4.257757 | 0.898033  |
| 29               | 7                | 0              | 0.373294                | -0.860391 | 0.774070  |
| 30               | 6                | 0              | 1.175654                | -0.045748 | 1.558364  |
| 31               | 6                | 0              | 0.852611                | 1.202630  | 2.145658  |
| 32               | 6                | 0              | 1.798276                | 1.905978  | 2.864055  |
| 33               | 6                | 0              | 3.098462                | 1.401876  | 3.032578  |
| 34               | 6                | 0              | 3.442425                | 0.174541  | 2.460074  |
| 35               | 6                | 0              | 2.490256                | -0.519708 | 1.726418  |
| 36               | 8                | 0              | 3.942622                | 2.175778  | 3.753497  |
| 37               | 6                | 0              | -0.928812               | -0.889985 | 0.660173  |
| 38               | 6                | 0              | -1.532861               | -1.772961 | -0.260953 |
| 39               | 6                | 0              | -2.997064               | -1.457446 | -0.387196 |
| 40               | 7                | 0              | -3.221169               | -0.553497 | 0.741616  |
| 41               | 6                | 0              | -2.057756               | -0.149357 | 1.355672  |
| 42               | 6                | 0              | -0.811725               | -2.687465 | -1.042485 |
| 43               | 6                | 0              | -3.887260               | -2.682050 | -0.368821 |
| 44               | 6                | 0              | -4.397668               | -3.184993 | -1.563963 |
| 45               | 6                | 0              | -5.165453               | -4.348837 | -1.567142 |
| 46               | 6                | 0              | -5.431830               | -5.007932 | -0.370561 |
| 47               | 6                | 0              | -4.925307               | -4.503957 | 0.827990  |
| 48               | 6                | 0              | -4.151960               | -3.348237 | 0.828971  |
| 49               | 6                | 0              | -4.498602               | -0.002720 | 1.004844  |
| 50               | 6                | 0              | -4.849000               | 0.437731  | 2.289867  |
| 51               | 6                | 0              | -6.106984               | 0.966466  | 2.524030  |
| 52               | 6                | 0              | -7.050803               | 1.055499  | 1.495210  |
| 53               | 6                | 0              | -6.715216               | 0.602280  | 0.219859  |
| 54               | 6                | 0              | -5.444885               | 0.078996  | -0.016286 |
| 55               | 8                | 0              | -1.992151               | 0.634642  | 2.287616  |
| 56               | 8                | 0              | -8.255799               | 1.585461  | 1.833345  |
| 57               | 1                | 0              | -3.155532               | -0.906920 | -1.331079 |
| 58               | 1                | 0              | 0.351106                | -2.890570 | -2.865808 |
| 59               | 1                | 0              | -0.936297               | -1.627194 | -3.113705 |
| 60               | 1                | 0              | 0.119080                | -3.026829 | -0.583381 |
| 61               | 1                | 0              | -1.406359               | -3.476143 | -1.502337 |
| 62               | 1                | 0              | 0.924036                | 0.672911  | -3.545183 |
| 63               | 1                | 0              | -4.196001               | -2.660828 | -2.496147 |

|     |   |   |            |           |           |
|-----|---|---|------------|-----------|-----------|
| 64  | 1 | 0 | -5.560043  | -4.733384 | -2.502430 |
| 65  | 1 | 0 | -6.035125  | -5.910263 | -0.368927 |
| 66  | 1 | 0 | -5.133687  | -5.013986 | 1.763264  |
| 67  | 1 | 0 | -3.755700  | -2.951043 | 1.760125  |
| 68  | 1 | 0 | -1.371912  | 0.603596  | -4.115490 |
| 69  | 1 | 0 | -3.655808  | 1.439096  | -3.661046 |
| 70  | 1 | 0 | -4.194361  | 2.440261  | -1.446296 |
| 71  | 1 | 0 | -2.430334  | 2.597995  | 0.292799  |
| 72  | 1 | 0 | -0.141687  | 1.765799  | -0.176835 |
| 73  | 1 | 0 | 1.140532   | 2.972786  | -3.447613 |
| 74  | 1 | 0 | 1.489193   | 5.407771  | -3.150553 |
| 75  | 1 | 0 | 3.414386   | 4.668576  | 0.618204  |
| 76  | 1 | 0 | 3.056598   | 2.256133  | 0.327422  |
| 77  | 1 | 0 | -4.131428  | 0.369885  | 3.095813  |
| 78  | 1 | 0 | -6.386294  | 1.312068  | 3.513874  |
| 79  | 1 | 0 | -7.424224  | 0.646449  | -0.598040 |
| 80  | 1 | 0 | -5.203015  | -0.265016 | -1.016306 |
| 81  | 1 | 0 | -0.145326  | 1.605522  | 2.047850  |
| 82  | 1 | 0 | 1.557267   | 2.865744  | 3.309677  |
| 83  | 1 | 0 | 4.440432   | -0.235893 | 2.554969  |
| 84  | 1 | 0 | 2.750661   | -1.465516 | 1.261155  |
| 85  | 1 | 0 | 2.825723   | -4.276213 | 0.442087  |
| 86  | 1 | 0 | 4.963619   | -5.081053 | 1.454929  |
| 87  | 1 | 0 | 7.131534   | -2.320198 | -1.021866 |
| 88  | 1 | 0 | 5.024916   | -1.496712 | -1.960609 |
| 89  | 6 | 0 | 8.541831   | -3.725918 | 0.510573  |
| 90  | 1 | 0 | 9.290966   | -4.253581 | 1.100070  |
| 91  | 1 | 0 | 8.731782   | -3.894128 | -0.555676 |
| 92  | 1 | 0 | 8.599187   | -2.652193 | 0.722797  |
| 93  | 6 | 0 | 3.246469   | 7.086960  | -0.050732 |
| 94  | 1 | 0 | 3.258939   | 8.167875  | -0.186855 |
| 95  | 1 | 0 | 2.686087   | 6.839563  | 0.858122  |
| 96  | 1 | 0 | 4.274315   | 6.719236  | 0.047171  |
| 97  | 6 | 0 | -9.230134  | 1.684308  | 0.813353  |
| 98  | 1 | 0 | -10.110239 | 2.129007  | 1.276571  |
| 99  | 1 | 0 | -8.884085  | 2.326774  | -0.004579 |
| 100 | 1 | 0 | -9.487454  | 0.696674  | 0.413607  |
| 101 | 6 | 0 | 5.272131   | 1.714919  | 3.918520  |
| 102 | 1 | 0 | 5.782492   | 2.472786  | 4.511490  |
| 103 | 1 | 0 | 5.294037   | 0.757262  | 4.449828  |
| 104 | 1 | 0 | 5.772988   | 1.605654  | 2.950434  |

-----  
**TS<sub>hetero</sub>-exo**  
 -----

| Center<br>Number | Atomic<br>Number | Atomic<br>Type | Coordinates (Angstroms) |           |           |
|------------------|------------------|----------------|-------------------------|-----------|-----------|
|                  |                  |                | X                       | Y         | Z         |
| 1                | 6                | 0              | 5.298461                | -2.493523 | -0.709909 |
| 2                | 6                | 0              | 4.482797                | -1.477190 | -1.209361 |
| 3                | 6                | 0              | 5.073562                | -0.455224 | -1.970887 |
| 4                | 6                | 0              | 6.433534                | -0.475546 | -2.228335 |
| 5                | 6                | 0              | 7.245498                | -1.499753 | -1.730450 |
| 6                | 6                | 0              | 6.669170                | -2.510867 | -0.964104 |
| 7                | 7                | 0              | 3.099562                | -1.469381 | -0.913623 |
| 8                | 6                | 0              | 2.544794                | -2.288081 | 0.164260  |
| 9                | 6                | 0              | 1.053625                | -2.001000 | 0.098436  |
| 10               | 6                | 0              | 0.796746                | -1.178294 | -1.020962 |
| 11               | 6                | 0              | 2.127215                | -0.812265 | -1.634900 |
| 12               | 7                | 0              | -0.270119               | -0.633086 | -1.545135 |
| 13               | 6                | 0              | -1.539649               | -1.165943 | -1.530329 |
| 14               | 6                | 0              | -2.598407               | -0.305146 | -1.897672 |
| 15               | 6                | 0              | -3.883437               | -0.774030 | -2.061784 |
| 16               | 6                | 0              | -4.159116               | -2.143235 | -1.913024 |
| 17               | 6                | 0              | -3.120447               | -3.024016 | -1.583820 |
| 18               | 6                | 0              | -1.839022               | -2.534006 | -1.375461 |
| 19               | 8                | 0              | -5.440308               | -2.518350 | -2.132413 |
| 20               | 6                | 0              | 0.183263                | -2.259843 | 1.159502  |
| 21               | 6                | 0              | 3.140841                | -1.978064 | 1.522785  |
| 22               | 6                | 0              | 3.238403                | -2.985708 | 2.482267  |
| 23               | 6                | 0              | 3.697929                | -2.694164 | 3.765658  |
| 24               | 6                | 0              | 4.074989                | -1.393405 | 4.089846  |
| 25               | 6                | 0              | 3.991537                | -0.387828 | 3.126714  |
| 26               | 6                | 0              | 3.523755                | -0.676887 | 1.848182  |
| 27               | 8                | 0              | 2.291523                | -0.112946 | -2.617381 |

|     |   |   |           |           |           |
|-----|---|---|-----------|-----------|-----------|
| 28  | 8 | 0 | 8.567897  | -1.420231 | -2.038486 |
| 29  | 6 | 0 | -0.027790 | -0.764925 | 2.366734  |
| 30  | 6 | 0 | -0.726157 | 0.293257  | 1.785187  |
| 31  | 6 | 0 | -2.090213 | 0.220174  | 1.361431  |
| 32  | 6 | 0 | -2.419725 | 1.558588  | 0.723543  |
| 33  | 7 | 0 | -1.291117 | 2.334444  | 0.842558  |
| 34  | 6 | 0 | -0.239198 | 1.715878  | 1.654531  |
| 35  | 7 | 0 | -2.746748 | -0.892376 | 1.504193  |
| 36  | 6 | 0 | -4.046488 | -1.254521 | 1.228591  |
| 37  | 6 | 0 | -5.106869 | -0.446157 | 0.772231  |
| 38  | 6 | 0 | -6.355504 | -0.990165 | 0.505166  |
| 39  | 6 | 0 | -6.576394 | -2.361357 | 0.673499  |
| 40  | 6 | 0 | -5.554918 | -3.172553 | 1.188473  |
| 41  | 6 | 0 | -4.318743 | -2.623935 | 1.454035  |
| 42  | 8 | 0 | -7.729507 | -2.994523 | 0.358793  |
| 43  | 6 | 0 | 1.162780  | 1.984408  | 1.148321  |
| 44  | 6 | 0 | 2.131259  | 2.425164  | 2.052793  |
| 45  | 6 | 0 | 3.411572  | 2.757722  | 1.616023  |
| 46  | 6 | 0 | 3.730822  | 2.651155  | 0.264086  |
| 47  | 6 | 0 | 2.765834  | 2.212143  | -0.641846 |
| 48  | 6 | 0 | 1.485212  | 1.878427  | -0.204398 |
| 49  | 6 | 0 | -1.235444 | 3.696368  | 0.451386  |
| 50  | 6 | 0 | -0.588419 | 4.637758  | 1.260326  |
| 51  | 6 | 0 | -0.512622 | 5.963717  | 0.868367  |
| 52  | 6 | 0 | -1.089298 | 6.379506  | -0.336186 |
| 53  | 6 | 0 | -1.734748 | 5.444920  | -1.147158 |
| 54  | 6 | 0 | -1.797042 | 4.109656  | -0.754584 |
| 55  | 8 | 0 | -3.454622 | 1.921328  | 0.188146  |
| 56  | 8 | 0 | -0.967092 | 7.700852  | -0.629600 |
| 57  | 1 | 0 | 2.716087  | -3.351484 | -0.061868 |
| 58  | 1 | 0 | -0.635652 | -1.411655 | 2.994915  |
| 59  | 1 | 0 | 0.975741  | -0.567295 | 2.739019  |
| 60  | 1 | 0 | -0.881943 | -2.333897 | 0.950065  |
| 61  | 1 | 0 | 0.544288  | -2.955059 | 1.914749  |
| 62  | 1 | 0 | -0.289820 | 2.139761  | 2.671718  |
| 63  | 1 | 0 | 2.954613  | -4.004188 | 2.224254  |
| 64  | 1 | 0 | 3.767592  | -3.484119 | 4.506964  |
| 65  | 1 | 0 | 4.439143  | -1.164583 | 5.086515  |
| 66  | 1 | 0 | 4.288394  | 0.628085  | 3.369639  |
| 67  | 1 | 0 | 3.453137  | 0.105896  | 1.096737  |
| 68  | 1 | 0 | 1.875713  | 2.523921  | 3.106015  |
| 69  | 1 | 0 | 4.153004  | 3.107529  | 2.328250  |
| 70  | 1 | 0 | 4.725386  | 2.912259  | -0.084427 |
| 71  | 1 | 0 | 2.999731  | 2.125425  | -1.697494 |
| 72  | 1 | 0 | 0.734312  | 1.545958  | -0.917663 |
| 73  | 1 | 0 | -0.136691 | 4.335434  | 2.199430  |
| 74  | 1 | 0 | -0.009506 | 6.700136  | 1.485854  |
| 75  | 1 | 0 | -2.183066 | 5.735068  | -2.089679 |
| 76  | 1 | 0 | -2.291846 | 3.386186  | -1.390396 |
| 77  | 1 | 0 | 4.459796  | 0.340525  | -2.367461 |
| 78  | 1 | 0 | 6.894327  | 0.309444  | -2.819130 |
| 79  | 1 | 0 | 7.266075  | -3.316880 | -0.554586 |
| 80  | 1 | 0 | 4.880360  | -3.287238 | -0.101278 |
| 81  | 1 | 0 | -2.370140 | 0.744058  | -2.055994 |
| 82  | 1 | 0 | -4.698041 | -0.107375 | -2.324813 |
| 83  | 1 | 0 | -3.304037 | -4.087881 | -1.487564 |
| 84  | 1 | 0 | -1.037404 | -3.231322 | -1.151030 |
| 85  | 1 | 0 | -3.507098 | -3.243522 | 1.823518  |
| 86  | 1 | 0 | -5.755371 | -4.227848 | 1.344183  |
| 87  | 1 | 0 | -7.141091 | -0.343563 | 0.132450  |
| 88  | 1 | 0 | -4.935636 | 0.608448  | 0.606056  |
| 89  | 6 | 0 | 9.408909  | -2.446099 | -1.549727 |
| 90  | 1 | 0 | 10.412500 | -2.209793 | -1.901914 |
| 91  | 1 | 0 | 9.403974  | -2.475049 | -0.453941 |
| 92  | 1 | 0 | 9.106901  | -3.425518 | -1.938469 |
| 93  | 6 | 0 | -8.714664 | -2.246572 | -0.333690 |
| 94  | 1 | 0 | -9.510663 | -2.949054 | -0.577936 |
| 95  | 1 | 0 | -9.117104 | -1.443541 | 0.292896  |
| 96  | 1 | 0 | -8.297670 | -1.820549 | -1.253237 |
| 97  | 6 | 0 | -5.731984 | -3.905139 | -2.144724 |
| 98  | 1 | 0 | -6.795602 | -3.986727 | -2.367428 |
| 99  | 1 | 0 | -5.150047 | -4.417314 | -2.919092 |
| 100 | 1 | 0 | -5.530418 | -4.359957 | -1.169608 |
| 101 | 6 | 0 | -1.526414 | 8.149989  | -1.848683 |

|     |   |   |           |          |           |
|-----|---|---|-----------|----------|-----------|
| 102 | 1 | 0 | -1.323772 | 9.219270 | -1.899035 |
| 103 | 1 | 0 | -1.062200 | 7.649443 | -2.706015 |
| 104 | 1 | 0 | -2.609190 | 7.982003 | -1.873893 |

-----  
**5f<sub>homo</sub>**  
 -----

| Center<br>Number | Atomic<br>Number | Atomic<br>Type | Coordinates (Angstroms) |           |           |
|------------------|------------------|----------------|-------------------------|-----------|-----------|
|                  |                  |                | X                       | Y         | Z         |
| 1                | 6                | 0              | 3.984188                | -1.961017 | 1.022883  |
| 2                | 6                | 0              | 3.967701                | -0.564758 | 0.952792  |
| 3                | 6                | 0              | 5.129612                | 0.100483  | 0.535926  |
| 4                | 6                | 0              | 6.234272                | -0.614481 | 0.101363  |
| 5                | 6                | 0              | 6.210490                | -2.010877 | 0.084035  |
| 6                | 6                | 0              | 5.095675                | -2.678154 | 0.590880  |
| 7                | 7                | 0              | 2.778586                | 0.179027  | 1.156259  |
| 8                | 6                | 0              | 2.668446                | 1.545425  | 0.630216  |
| 9                | 6                | 0              | 1.165788                | 1.685124  | 0.320995  |
| 10               | 6                | 0              | 0.534359                | 0.729793  | 1.315661  |
| 11               | 6                | 0              | 1.585605                | -0.319376 | 1.625381  |
| 12               | 7                | 0              | -0.697465               | 0.814703  | 1.627212  |
| 13               | 6                | 0              | -1.559316               | -0.217916 | 2.034978  |
| 14               | 6                | 0              | -2.725856               | 0.153854  | 2.711104  |
| 15               | 6                | 0              | -3.754292               | -0.755375 | 2.942558  |
| 16               | 6                | 0              | -3.645298               | -2.055886 | 2.443145  |
| 17               | 6                | 0              | -2.483474               | -2.439062 | 1.761459  |
| 18               | 6                | 0              | -1.455056               | -1.537846 | 1.561562  |
| 19               | 8                | 0              | -4.606549               | -3.008423 | 2.558191  |
| 20               | 6                | 0              | -5.826676               | -2.629678 | 3.166403  |
| 21               | 6                | 0              | 0.666163                | 3.128925  | 0.291666  |
| 22               | 6                | 0              | 3.193642                | 2.584198  | 1.603568  |
| 23               | 6                | 0              | 3.846913                | 3.714438  | 1.107392  |
| 24               | 6                | 0              | 4.295879                | 4.708972  | 1.972092  |
| 25               | 6                | 0              | 4.097767                | 4.578084  | 3.344809  |
| 26               | 6                | 0              | 3.454815                | 3.448221  | 3.846439  |
| 27               | 6                | 0              | 3.006418                | 2.453816  | 2.980675  |
| 28               | 8                | 0              | 1.421915                | -1.372225 | 2.217989  |
| 29               | 8                | 0              | 7.305042                | -2.626132 | -0.439440 |
| 30               | 6                | 0              | 7.205562                | -4.019905 | -0.666963 |
| 31               | 6                | 0              | -0.828204               | 3.257303  | -0.070235 |
| 32               | 6                | 0              | -1.314212               | 2.053120  | -0.794674 |
| 33               | 6                | 0              | -0.537905               | 1.060189  | -1.248134 |
| 34               | 6                | 0              | -1.414874               | -0.091973 | -1.638918 |
| 35               | 7                | 0              | -2.720535               | 0.296264  | -1.362793 |
| 36               | 6                | 0              | -2.757001               | 1.650907  | -0.820725 |
| 37               | 7                | 0              | 0.838177                | 1.036702  | -1.016378 |
| 38               | 6                | 0              | 1.732699                | 0.086895  | -1.612915 |
| 39               | 6                | 0              | 1.669603                | -1.289228 | -1.351234 |
| 40               | 6                | 0              | 2.656317                | -2.140983 | -1.811265 |
| 41               | 6                | 0              | 3.758805                | -1.636225 | -2.513077 |
| 42               | 6                | 0              | 3.807472                | -0.279771 | -2.833626 |
| 43               | 6                | 0              | 2.787119                | 0.563612  | -2.388609 |
| 44               | 8                | 0              | -1.072792               | -1.172041 | -2.085749 |
| 45               | 6                | 0              | -3.788883               | -0.599479 | -1.093846 |
| 46               | 6                | 0              | -3.692976               | -1.976291 | -1.321702 |
| 47               | 6                | 0              | -4.700010               | -2.840207 | -0.896356 |
| 48               | 6                | 0              | -5.831315               | -2.345750 | -0.250863 |
| 49               | 6                | 0              | -5.968757               | -0.966110 | -0.092868 |
| 50               | 6                | 0              | -4.964221               | -0.105544 | -0.506591 |
| 51               | 6                | 0              | -3.620947               | 2.617564  | -1.610122 |
| 52               | 6                | 0              | -4.313268               | 3.629148  | -0.944543 |
| 53               | 6                | 0              | -5.058158               | 4.563161  | -1.662488 |
| 54               | 6                | 0              | -5.117382               | 4.485977  | -3.051357 |
| 55               | 6                | 0              | -4.427316               | 3.474409  | -3.719336 |
| 56               | 6                | 0              | -3.678625               | 2.546309  | -3.002560 |
| 57               | 8                | 0              | -6.839102               | -3.115425 | 0.247533  |
| 58               | 6                | 0              | -6.606421               | -4.509755 | 0.303965  |
| 59               | 8                | 0              | 4.724778                | -2.537867 | -2.827923 |
| 60               | 6                | 0              | 5.923737                | -2.032519 | -3.385702 |
| 61               | 1                | 0              | 3.238650                | 1.614710  | -0.298157 |
| 62               | 1                | 0              | -1.426280               | 3.361912  | 0.842066  |
| 63               | 1                | 0              | -0.993542               | 4.166712  | -0.660704 |
| 64               | 1                | 0              | 0.851154                | 3.594965  | 1.262657  |
| 65               | 1                | 0              | 1.280817                | 3.659151  | -0.444755 |



|     |   |   |           |           |           |
|-----|---|---|-----------|-----------|-----------|
| 66  | 1 | 0 | -3.106135 | 1.608469  | 0.223393  |
| 67  | 1 | 0 | 4.005398  | 3.814294  | 0.035447  |
| 68  | 1 | 0 | 4.804863  | 5.581177  | 1.574172  |
| 69  | 1 | 0 | 4.449662  | 5.349856  | 4.021965  |
| 70  | 1 | 0 | 3.305213  | 3.336754  | 4.915690  |
| 71  | 1 | 0 | 2.518602  | 1.569903  | 3.382638  |
| 72  | 1 | 0 | -4.274838 | 3.680747  | 0.141749  |
| 73  | 1 | 0 | -5.596359 | 5.344765  | -1.135308 |
| 74  | 1 | 0 | -5.702086 | 5.208121  | -3.612480 |
| 75  | 1 | 0 | -4.473389 | 3.408523  | -4.801965 |
| 76  | 1 | 0 | -3.140712 | 1.755476  | -3.518506 |
| 77  | 1 | 0 | -5.103177 | 0.958093  | -0.353443 |
| 78  | 1 | 0 | -6.868824 | -0.578659 | 0.374430  |
| 79  | 1 | 0 | -4.570949 | -3.904033 | -1.058934 |
| 80  | 1 | 0 | -2.812798 | -2.382732 | -1.796725 |
| 81  | 1 | 0 | 3.110799  | -2.493730 | 1.371625  |
| 82  | 1 | 0 | 5.058545  | -3.760668 | 0.621151  |
| 83  | 1 | 0 | 7.123802  | -0.101490 | -0.249973 |
| 84  | 1 | 0 | 5.172931  | 1.184016  | 0.527205  |
| 85  | 1 | 0 | -0.576081 | -1.841265 | 1.005650  |
| 86  | 1 | 0 | -2.428018 | -3.446604 | 1.362585  |
| 87  | 1 | 0 | -4.644049 | -0.429665 | 3.468001  |
| 88  | 1 | 0 | -2.826324 | 1.183600  | 3.042341  |
| 89  | 1 | 0 | 2.826234  | 1.624694  | -2.620639 |
| 90  | 1 | 0 | 4.632568  | 0.135798  | -3.399486 |
| 91  | 1 | 0 | 2.630329  | -3.201380 | -1.582833 |
| 92  | 1 | 0 | 0.848059  | -1.686246 | -0.766725 |
| 93  | 1 | 0 | 8.114799  | -4.307204 | -1.194931 |
| 94  | 1 | 0 | 7.144153  | -4.575480 | 0.275669  |
| 95  | 1 | 0 | 6.328075  | -4.248225 | -1.283691 |
| 96  | 1 | 0 | 6.592596  | -2.886779 | -3.491942 |
| 97  | 1 | 0 | 5.745822  | -1.585254 | -4.370212 |
| 98  | 1 | 0 | 6.380160  | -1.291840 | -2.718423 |
| 99  | 1 | 0 | -6.471378 | -3.507481 | 3.125099  |
| 100 | 1 | 0 | -5.670951 | -2.336054 | 4.210883  |
| 101 | 1 | 0 | -6.298069 | -1.807893 | 2.615995  |
| 102 | 1 | 0 | -7.461463 | -4.939702 | 0.826370  |
| 103 | 1 | 0 | -6.542097 | -4.946185 | -0.699533 |
| 104 | 1 | 0 | -5.684997 | -4.723739 | 0.858226  |

-----  
**5f<sub>hetero</sub>**  
 -----

| Center<br>Number | Atomic<br>Number | Atomic<br>Type | Coordinates (Angstroms) |           |           |
|------------------|------------------|----------------|-------------------------|-----------|-----------|
|                  |                  |                | X                       | Y         | Z         |
| 1                | 6                | 0              | 4.374160                | -3.191086 | -0.545514 |
| 2                | 6                | 0              | 3.154706                | -3.093607 | -1.214484 |
| 3                | 6                | 0              | 3.023408                | -3.687369 | -2.477071 |
| 4                | 6                | 0              | 4.107620                | -4.297279 | -3.083584 |
| 5                | 6                | 0              | 5.333984                | -4.376869 | -2.413349 |
| 6                | 6                | 0              | 5.459360                | -3.834381 | -1.131111 |
| 7                | 7                | 0              | 1.992688                | -2.537921 | -0.640634 |
| 8                | 6                | 0              | 1.960694                | -1.436092 | -0.017921 |
| 9                | 6                | 0              | 0.679866                | -0.927875 | 0.635123  |
| 10               | 6                | 0              | 1.239401                | 0.184612  | 1.592387  |
| 11               | 7                | 0              | 2.480487                | 0.607031  | 0.926560  |
| 12               | 6                | 0              | 3.013518                | -0.350295 | 0.104121  |
| 13               | 6                | 0              | -0.054146               | -2.085419 | 1.324153  |
| 14               | 8                | 0              | 4.072604                | -0.300452 | -0.493362 |
| 15               | 6                | 0              | 2.940439                | 1.944741  | 1.019474  |
| 16               | 6                | 0              | 2.446501                | 2.777342  | 2.033465  |
| 17               | 6                | 0              | 2.778173                | 4.121715  | 2.066187  |
| 18               | 6                | 0              | 3.619079                | 4.667971  | 1.092723  |
| 19               | 6                | 0              | 4.139902                | 3.838303  | 0.099006  |
| 20               | 6                | 0              | 3.804789                | 2.487289  | 0.064360  |
| 21               | 6                | 0              | 1.490001                | -0.240272 | 3.027197  |
| 22               | 6                | 0              | 0.648482                | 0.217645  | 4.042830  |
| 23               | 6                | 0              | 0.846798                | -0.177770 | 5.363845  |
| 24               | 6                | 0              | 1.895599                | -1.035700 | 5.682025  |
| 25               | 6                | 0              | 2.747512                | -1.489250 | 4.675893  |
| 26               | 6                | 0              | 2.549105                | -1.089527 | 3.357853  |
| 27               | 8                | 0              | 3.869633                | 6.001368  | 1.194808  |
| 28               | 8                | 0              | 6.333663                | -5.011066 | -3.078563 |
| 29               | 7                | 0              | -0.197685               | -0.317317 | -0.408745 |

|     |   |   |            |           |           |
|-----|---|---|------------|-----------|-----------|
| 30  | 6 | 0 | 0.333774   | 0.836488  | -1.085513 |
| 31  | 6 | 0 | 1.256134   | 0.672175  | -2.123337 |
| 32  | 6 | 0 | 1.874499   | 1.774999  | -2.690733 |
| 33  | 6 | 0 | 1.559973   | 3.067073  | -2.252046 |
| 34  | 6 | 0 | 0.591716   | 3.244286  | -1.264003 |
| 35  | 6 | 0 | -0.002258  | 2.126607  | -0.682832 |
| 36  | 8 | 0 | 2.252166   | 4.079803  | -2.835937 |
| 37  | 6 | 0 | -1.545716  | -0.276813 | -0.064489 |
| 38  | 6 | 0 | -2.123364  | -0.846446 | 1.002492  |
| 39  | 6 | 0 | -3.615906  | -0.653833 | 0.951031  |
| 40  | 7 | 0 | -3.801614  | 0.088267  | -0.293475 |
| 41  | 6 | 0 | -2.603518  | 0.310365  | -0.947655 |
| 42  | 6 | 0 | -1.374858  | -1.679020 | 1.984101  |
| 43  | 6 | 0 | -4.366663  | -1.973270 | 0.972646  |
| 44  | 6 | 0 | -5.017619  | -2.389101 | 2.132262  |
| 45  | 6 | 0 | -5.657743  | -3.627660 | 2.175367  |
| 46  | 6 | 0 | -5.651122  | -4.451851 | 1.054530  |
| 47  | 6 | 0 | -4.999467  | -4.038104 | -0.108393 |
| 48  | 6 | 0 | -4.356189  | -2.806335 | -0.147650 |
| 49  | 6 | 0 | -5.081399  | 0.481671  | -0.749353 |
| 50  | 6 | 0 | -5.329771  | 0.757049  | -2.103619 |
| 51  | 6 | 0 | -6.598865  | 1.128025  | -2.516582 |
| 52  | 6 | 0 | -7.654997  | 1.221229  | -1.604867 |
| 53  | 6 | 0 | -7.418932  | 0.934877  | -0.261675 |
| 54  | 6 | 0 | -6.139429  | 0.571635  | 0.155874  |
| 55  | 8 | 0 | -2.453682  | 0.857957  | -2.024234 |
| 56  | 8 | 0 | -8.860204  | 1.588853  | -2.117960 |
| 57  | 1 | 0 | -3.940284  | -0.044844 | 1.807360  |
| 58  | 1 | 0 | 0.623241   | -2.543066 | 2.049038  |
| 59  | 1 | 0 | -0.249777  | -2.829380 | 0.546513  |
| 60  | 1 | 0 | -1.206944  | -1.146103 | 2.927822  |
| 61  | 1 | 0 | -1.950470  | -2.578497 | 2.234246  |
| 62  | 1 | 0 | 0.541031   | 1.027634  | 1.592067  |
| 63  | 1 | 0 | -5.026903  | -1.740634 | 3.005283  |
| 64  | 1 | 0 | -6.164742  | -3.942095 | 3.082337  |
| 65  | 1 | 0 | -6.152993  | -5.413849 | 1.083078  |
| 66  | 1 | 0 | -4.993632  | -4.677968 | -0.985101 |
| 67  | 1 | 0 | -3.848468  | -2.480873 | -1.052629 |
| 68  | 1 | 0 | -0.166457  | 0.896323  | 3.795356  |
| 69  | 1 | 0 | 0.186156   | 0.190798  | 6.142443  |
| 70  | 1 | 0 | 2.055171   | -1.344123 | 6.710315  |
| 71  | 1 | 0 | 3.572994   | -2.151163 | 4.918400  |
| 72  | 1 | 0 | 3.230425   | -1.437248 | 2.584999  |
| 73  | 1 | 0 | 1.802490   | 2.378376  | 2.809347  |
| 74  | 1 | 0 | 2.393045   | 4.769587  | 2.846626  |
| 75  | 1 | 0 | 4.796301   | 4.228533  | -0.670417 |
| 76  | 1 | 0 | 4.199296   | 1.864850  | -0.725183 |
| 77  | 1 | 0 | -4.526967  | 0.686185  | -2.823446 |
| 78  | 1 | 0 | -6.796349  | 1.345221  | -3.560839 |
| 79  | 1 | 0 | -8.213099  | 0.988412  | 0.473810  |
| 80  | 1 | 0 | -5.984181  | 0.352198  | 1.206105  |
| 81  | 1 | 0 | 1.499760   | -0.328277 | -2.469011 |
| 82  | 1 | 0 | 2.613685   | 1.658710  | -3.476478 |
| 83  | 1 | 0 | 0.314537   | 4.232342  | -0.916855 |
| 84  | 1 | 0 | -0.742236  | 2.268356  | 0.102037  |
| 85  | 1 | 0 | 2.060970   | -3.645805 | -2.977505 |
| 86  | 1 | 0 | 4.025902   | -4.739032 | -4.071146 |
| 87  | 1 | 0 | 6.392147   | -3.901905 | -0.583470 |
| 88  | 1 | 0 | 4.474916   | -2.769828 | 0.449545  |
| 89  | 6 | 0 | 7.591442   | -5.099838 | -2.437473 |
| 90  | 1 | 0 | 8.248784   | -5.620399 | -3.132427 |
| 91  | 1 | 0 | 7.998077   | -4.105020 | -2.223906 |
| 92  | 1 | 0 | 7.521253   | -5.670606 | -1.504040 |
| 93  | 6 | 0 | -9.943952  | 1.687302  | -1.215715 |
| 94  | 1 | 0 | -10.806766 | 1.988930  | -1.808712 |
| 95  | 1 | 0 | -10.150203 | 0.723902  | -0.735529 |
| 96  | 1 | 0 | -9.750600  | 2.441512  | -0.443475 |
| 97  | 6 | 0 | 4.799330   | 6.558121  | 0.285253  |
| 98  | 1 | 0 | 4.896339   | 7.608883  | 0.556642  |
| 99  | 1 | 0 | 5.774766   | 6.066035  | 0.366663  |
| 100 | 1 | 0 | 4.443040   | 6.481290  | -0.748849 |
| 101 | 6 | 0 | 1.978441   | 5.391831  | -2.385805 |
| 102 | 1 | 0 | 2.648216   | 6.049258  | -2.940424 |
| 103 | 1 | 0 | 0.939265   | 5.673561  | -2.590855 |

104            1            0            2.173740    5.487961    -1.310219

5f<sub>homo-EXO</sub>

| Center Number | Atomic Number | Atomic Type | Coordinates (Angstroms) |           |           |
|---------------|---------------|-------------|-------------------------|-----------|-----------|
|               |               |             | X                       | Y         | Z         |
| 1             | 6             | 0           | 5.343130                | -1.212281 | -1.478050 |
| 2             | 6             | 0           | 4.266920                | -1.884605 | -0.905094 |
| 3             | 6             | 0           | 4.505130                | -3.020631 | -0.121582 |
| 4             | 6             | 0           | 5.800990                | -3.435826 | 0.130846  |
| 5             | 6             | 0           | 6.881955                | -2.752945 | -0.439573 |
| 6             | 6             | 0           | 6.648448                | -1.644690 | -1.257152 |
| 7             | 7             | 0           | 2.917695                | -1.552132 | -1.156133 |
| 8             | 6             | 0           | 2.432485                | -0.400443 | -0.968018 |
| 9             | 6             | 0           | 0.965871                | -0.100977 | -1.226331 |
| 10            | 6             | 0           | 0.988582                | 1.463555  | -1.387936 |
| 11            | 7             | 0           | 2.167095                | 1.857886  | -0.596545 |
| 12            | 6             | 0           | 3.068724                | 0.847611  | -0.390401 |
| 13            | 6             | 0           | 0.456310                | -0.849162 | -2.469705 |
| 14            | 8             | 0           | 4.138642                | 0.931448  | 0.181092  |
| 15            | 6             | 0           | 2.448492                | 3.213052  | -0.279781 |
| 16            | 6             | 0           | 2.109326                | 4.230813  | -1.178295 |
| 17            | 6             | 0           | 2.376202                | 5.552863  | -0.867263 |
| 18            | 6             | 0           | 2.994852                | 5.883397  | 0.344019  |
| 19            | 6             | 0           | 3.334976                | 4.871121  | 1.242597  |
| 20            | 6             | 0           | 3.053817                | 3.542582  | 0.929966  |
| 21            | 6             | 0           | -0.262553               | 2.196512  | -0.960456 |
| 22            | 6             | 0           | -1.132335               | 2.699444  | -1.928024 |
| 23            | 6             | 0           | -2.356880               | 3.255227  | -1.561574 |
| 24            | 6             | 0           | -2.710397               | 3.327455  | -0.216156 |
| 25            | 6             | 0           | -1.818314               | 2.880137  | 0.758504  |
| 26            | 6             | 0           | -0.594880               | 2.329965  | 0.390425  |
| 27            | 8             | 0           | 3.218485                | 7.206183  | 0.554173  |
| 28            | 8             | 0           | 8.114947                | -3.248425 | -0.151803 |
| 29            | 7             | 0           | 0.179126                | -0.468808 | -0.019041 |
| 30            | 6             | 0           | 0.705525                | -1.416517 | 0.919305  |
| 31            | 6             | 0           | 1.642094                | -1.003293 | 1.872774  |
| 32            | 6             | 0           | 2.200657                | -1.916424 | 2.749166  |
| 33            | 6             | 0           | 1.810003                | -3.261928 | 2.709178  |
| 34            | 6             | 0           | 0.857202                | -3.678396 | 1.778451  |
| 35            | 6             | 0           | 0.321134                | -2.751408 | 0.882938  |
| 36            | 8             | 0           | 2.409080                | -4.078561 | 3.614678  |
| 37            | 6             | 0           | -1.184924               | -0.556640 | -0.279165 |
| 38            | 6             | 0           | -1.774487               | -0.550703 | -1.478311 |
| 39            | 6             | 0           | -3.264688               | -0.415560 | -1.311872 |
| 40            | 7             | 0           | -3.428241               | -0.396572 | 0.142533  |
| 41            | 6             | 0           | -2.208879               | -0.426116 | 0.795732  |
| 42            | 6             | 0           | -1.025466               | -0.581824 | -2.764592 |
| 43            | 6             | 0           | -4.023862               | -1.541328 | -1.986713 |
| 44            | 6             | 0           | -4.673660               | -1.322629 | -3.199600 |
| 45            | 6             | 0           | -5.319079               | -2.372488 | -3.852002 |
| 46            | 6             | 0           | -5.319772               | -3.645135 | -3.288524 |
| 47            | 6             | 0           | -4.670708               | -3.866955 | -2.073278 |
| 48            | 6             | 0           | -4.021479               | -2.820576 | -1.427522 |
| 49            | 6             | 0           | -4.682968               | -0.180201 | 0.753121  |
| 50            | 6             | 0           | -4.894176               | -0.478248 | 2.109513  |
| 51            | 6             | 0           | -6.135089               | -0.263213 | 2.684141  |
| 52            | 6             | 0           | -7.201294               | 0.237299  | 1.929683  |
| 53            | 6             | 0           | -7.003665               | 0.520799  | 0.580090  |
| 54            | 6             | 0           | -5.750620               | 0.314108  | 0.003308  |
| 55            | 8             | 0           | -2.009144               | -0.338372 | 1.993355  |
| 56            | 8             | 0           | -8.377910               | 0.406369  | 2.592659  |
| 57            | 1             | 0           | -3.583372               | 0.549919  | -1.733742 |
| 58            | 1             | 0           | 0.613120                | -1.914576 | -2.271990 |
| 59            | 1             | 0           | 1.078988                | -0.589348 | -3.331034 |
| 60            | 1             | 0           | -1.422375               | -1.362745 | -3.424615 |
| 61            | 1             | 0           | -1.160047               | 0.368048  | -3.299109 |
| 62            | 1             | 0           | 1.173684                | 1.676117  | -2.451562 |
| 63            | 1             | 0           | -4.678508               | -0.325093 | -3.633942 |
| 64            | 1             | 0           | -5.825110               | -2.192659 | -4.795391 |
| 65            | 1             | 0           | -5.826566               | -4.462772 | -3.791340 |
| 66            | 1             | 0           | -4.671356               | -4.857748 | -1.629670 |
| 67            | 1             | 0           | -3.515251               | -2.986200 | -0.479267 |

|     |   |   |            |           |           |
|-----|---|---|------------|-----------|-----------|
| 68  | 1 | 0 | -0.856038  | 2.644726  | -2.979083 |
| 69  | 1 | 0 | -3.030095  | 3.631488  | -2.325879 |
| 70  | 1 | 0 | -3.669468  | 3.744573  | 0.074826  |
| 71  | 1 | 0 | -2.083168  | 2.942900  | 1.809157  |
| 72  | 1 | 0 | 0.086199   | 1.957968  | 1.149825  |
| 73  | 1 | 0 | 1.630802   | 3.989522  | -2.122212 |
| 74  | 1 | 0 | 2.114975   | 6.352162  | -1.552425 |
| 75  | 1 | 0 | 3.808804   | 5.098013  | 2.189887  |
| 76  | 1 | 0 | 3.314409   | 2.758472  | 1.630566  |
| 77  | 1 | 0 | -4.080846  | -0.866463 | 2.706429  |
| 78  | 1 | 0 | -6.303719  | -0.487712 | 3.732380  |
| 79  | 1 | 0 | -7.806979  | 0.902305  | -0.038747 |
| 80  | 1 | 0 | -5.626054  | 0.539962  | -1.049806 |
| 81  | 1 | 0 | 1.929249   | 0.043812  | 1.921496  |
| 82  | 1 | 0 | 2.935845   | -1.611304 | 3.486133  |
| 83  | 1 | 0 | 0.533025   | -4.711066 | 1.729963  |
| 84  | 1 | 0 | -0.404774  | -3.076783 | 0.141906  |
| 85  | 1 | 0 | 3.656066   | -3.550684 | 0.301118  |
| 86  | 1 | 0 | 6.003551   | -4.298424 | 0.756949  |
| 87  | 1 | 0 | 7.467522   | -1.107443 | -1.719890 |
| 88  | 1 | 0 | 5.161374   | -0.346203 | -2.106644 |
| 89  | 6 | 0 | 9.231170   | -2.573274 | -0.697417 |
| 90  | 1 | 0 | 10.111728  | -3.108592 | -0.343672 |
| 91  | 1 | 0 | 9.209432   | -2.591200 | -1.793187 |
| 92  | 1 | 0 | 9.272622   | -1.533574 | -0.353321 |
| 93  | 6 | 0 | 3.831275   | 7.576807  | 1.774550  |
| 94  | 1 | 0 | 3.920097   | 8.662311  | 1.750996  |
| 95  | 1 | 0 | 3.217665   | 7.278703  | 2.632186  |
| 96  | 1 | 0 | 4.827713   | 7.130490  | 1.868950  |
| 97  | 6 | 0 | -9.470097  | 0.911906  | 1.851752  |
| 98  | 1 | 0 | -10.305825 | 0.976782  | 2.547840  |
| 99  | 1 | 0 | -9.250904  | 1.908507  | 1.450940  |
| 100 | 1 | 0 | -9.734429  | 0.241092  | 1.025951  |
| 101 | 6 | 0 | 2.061010   | -5.448729 | 3.584275  |
| 102 | 1 | 0 | 2.649409   | -5.928469 | 4.365588  |
| 103 | 1 | 0 | 0.994202   | -5.592073 | 3.790394  |
| 104 | 1 | 0 | 2.305834   | -5.897531 | 2.614434  |

-----  
**5f<sub>hetero-exo</sub>**

| Center<br>Number | Atomic<br>Number | Atomic<br>Type | Coordinates (Angstroms) |           |           |
|------------------|------------------|----------------|-------------------------|-----------|-----------|
|                  |                  |                | X                       | Y         | Z         |
| 1                | 6                | 0              | -5.686605               | -1.990079 | 0.533508  |
| 2                | 6                | 0              | -4.661352               | -1.168605 | 1.002202  |
| 3                | 6                | 0              | -4.937825               | -0.282490 | 2.055989  |
| 4                | 6                | 0              | -6.200983               | -0.246659 | 2.621444  |
| 5                | 6                | 0              | -7.225081               | -1.074220 | 2.149798  |
| 6                | 6                | 0              | -6.962071               | -1.946352 | 1.095437  |
| 7                | 7                | 0              | -3.387031               | -1.216158 | 0.393022  |
| 8                | 6                | 0              | -3.202293               | -1.703100 | -0.980178 |
| 9                | 6                | 0              | -1.726293               | -1.520944 | -1.194937 |
| 10               | 6                | 0              | -1.188196               | -0.915695 | -0.135820 |
| 11               | 6                | 0              | -2.208678               | -0.722410 | 0.928170  |
| 12               | 6                | 0              | -0.901823               | -1.745675 | -2.417804 |
| 13               | 6                | 0              | -0.057389               | -0.477724 | -2.611870 |
| 14               | 6                | 0              | 0.714778                | -0.007956 | -1.358610 |
| 15               | 7                | 0              | 0.113365                | -0.433069 | -0.061120 |
| 16               | 6                | 0              | 0.840821                | 1.547376  | -1.397787 |
| 17               | 7                | 0              | 2.055306                | 1.777983  | -0.600234 |
| 18               | 6                | 0              | 2.938026                | 0.720892  | -0.660917 |
| 19               | 6                | 0              | 2.173750                | -0.420317 | -1.320977 |
| 20               | 7                | 0              | 2.572838                | -1.515244 | -1.815869 |
| 21               | 6                | 0              | 3.873892                | -2.029818 | -1.631266 |
| 22               | 6                | 0              | 4.463044                | -2.114440 | -0.369309 |
| 23               | 6                | 0              | 5.689971                | -2.748662 | -0.199275 |
| 24               | 6                | 0              | 6.347380                | -3.294340 | -1.305069 |
| 25               | 6                | 0              | 5.753314                | -3.223981 | -2.571173 |
| 26               | 6                | 0              | 4.516264                | -2.622288 | -2.725499 |
| 27               | 8                | 0              | 7.550594                | -3.923090 | -1.248574 |
| 28               | 6                | 0              | -0.398086               | 2.294847  | -0.966450 |
| 29               | 6                | 0              | -1.126973               | 2.984654  | -1.940368 |
| 30               | 6                | 0              | -2.301631               | 3.658211  | -1.613440 |
| 31               | 6                | 0              | -2.772201               | 3.634508  | -0.302946 |

|     |   |   |            |           |           |
|-----|---|---|------------|-----------|-----------|
| 32  | 6 | 0 | -2.052542  | 2.948606  | 0.675051  |
| 33  | 6 | 0 | -0.866392  | 2.294648  | 0.351393  |
| 34  | 6 | 0 | 2.441452   | 3.059577  | -0.131080 |
| 35  | 6 | 0 | 2.060306   | 4.217425  | -0.818641 |
| 36  | 6 | 0 | 2.423282   | 5.464774  | -0.339449 |
| 37  | 6 | 0 | 3.183424   | 5.580964  | 0.829400  |
| 38  | 6 | 0 | 3.572754   | 4.428725  | 1.514574  |
| 39  | 6 | 0 | 3.196095   | 3.176470  | 1.034684  |
| 40  | 8 | 0 | 4.094532   | 0.732543  | -0.289582 |
| 41  | 8 | 0 | 3.491344   | 6.846514  | 1.214548  |
| 42  | 6 | 0 | 0.922297   | -1.018209 | 0.975595  |
| 43  | 6 | 0 | 1.602800   | -0.217612 | 1.898997  |
| 44  | 6 | 0 | 2.404691   | -0.791554 | 2.873330  |
| 45  | 6 | 0 | 2.525437   | -2.183925 | 2.958429  |
| 46  | 6 | 0 | 1.827553   | -2.994721 | 2.059557  |
| 47  | 6 | 0 | 1.039780   | -2.403084 | 1.074730  |
| 48  | 8 | 0 | 3.336885   | -2.650527 | 3.940996  |
| 49  | 6 | 0 | -3.996088  | -0.898098 | -1.994938 |
| 50  | 6 | 0 | -4.761783  | -1.532253 | -2.969664 |
| 51  | 6 | 0 | -5.445216  | -0.779871 | -3.925486 |
| 52  | 6 | 0 | -5.364977  | 0.608956  | -3.903823 |
| 53  | 6 | 0 | -4.595236  | 1.245733  | -2.928474 |
| 54  | 6 | 0 | -3.908308  | 0.496433  | -1.981047 |
| 55  | 8 | 0 | -2.042361  | -0.230229 | 2.030882  |
| 56  | 8 | 0 | -8.428649  | -0.953816 | 2.773401  |
| 57  | 1 | 0 | -3.477276  | -2.763585 | -1.050548 |
| 58  | 1 | 0 | 0.662170   | -0.608951 | -3.425147 |
| 59  | 1 | 0 | -0.747109  | 0.325393  | -2.899084 |
| 60  | 1 | 0 | -0.247112  | -2.615844 | -2.283239 |
| 61  | 1 | 0 | -1.520518  | -1.923918 | -3.302657 |
| 62  | 1 | 0 | 1.048931   | 1.826205  | -2.442007 |
| 63  | 1 | 0 | -4.828495  | -2.617997 | -2.981095 |
| 64  | 1 | 0 | -6.042857  | -1.280993 | -4.680512 |
| 65  | 1 | 0 | -5.900220  | 1.196420  | -4.643269 |
| 66  | 1 | 0 | -4.527518  | 2.329064  | -2.905895 |
| 67  | 1 | 0 | -3.302623  | 0.992670  | -1.223206 |
| 68  | 1 | 0 | -0.763601  | 3.003072  | -2.965924 |
| 69  | 1 | 0 | -2.844130  | 4.200681  | -2.381858 |
| 70  | 1 | 0 | -3.691925  | 4.149396  | -0.043065 |
| 71  | 1 | 0 | -2.412119  | 2.919379  | 1.698819  |
| 72  | 1 | 0 | -0.326748  | 1.758891  | 1.122865  |
| 73  | 1 | 0 | 1.475132   | 4.144888  | -1.729214 |
| 74  | 1 | 0 | 2.129988   | 6.369756  | -0.860704 |
| 75  | 1 | 0 | 4.161941   | 4.487552  | 2.421659  |
| 76  | 1 | 0 | 3.504539   | 2.283073  | 1.565651  |
| 77  | 1 | 0 | -4.157817  | 0.366310  | 2.429140  |
| 78  | 1 | 0 | -6.420410  | 0.433453  | 3.438109  |
| 79  | 1 | 0 | -7.730776  | -2.598704 | 0.698874  |
| 80  | 1 | 0 | -5.508379  | -2.678994 | -0.284730 |
| 81  | 1 | 0 | 1.509376   | 0.862634  | 1.844108  |
| 82  | 1 | 0 | 2.942877   | -0.179066 | 3.589243  |
| 83  | 1 | 0 | 1.901205   | -4.074621 | 2.102963  |
| 84  | 1 | 0 | 0.511900   | -3.029785 | 0.360636  |
| 85  | 1 | 0 | 4.036129   | -2.590692 | -3.698626 |
| 86  | 1 | 0 | 6.273828   | -3.666569 | -3.413889 |
| 87  | 1 | 0 | 6.120286   | -2.804274 | 0.793630  |
| 88  | 1 | 0 | 3.949654   | -1.688128 | 0.487027  |
| 89  | 6 | 0 | -9.478865  | -1.782162 | 2.316691  |
| 90  | 1 | 0 | -10.344429 | -1.544014 | 2.934146  |
| 91  | 1 | 0 | -9.714603  | -1.581273 | 1.265083  |
| 92  | 1 | 0 | -9.227712  | -2.842784 | 2.434005  |
| 93  | 6 | 0 | 3.535857   | -4.049839 | 4.010739  |
| 94  | 1 | 0 | 4.231712   | -4.215780 | 4.832292  |
| 95  | 1 | 0 | 2.596572   | -4.575056 | 4.216694  |
| 96  | 1 | 0 | 3.969315   | -4.432334 | 3.079207  |
| 97  | 6 | 0 | 8.184946   | -4.001996 | 0.013167  |
| 98  | 1 | 0 | 9.127365   | -4.522527 | -0.153667 |
| 99  | 1 | 0 | 8.384812   | -3.003928 | 0.419016  |
| 100 | 1 | 0 | 7.576928   | -4.568172 | 0.728142  |
| 101 | 6 | 0 | 4.255722   | 6.999596  | 2.395153  |
| 102 | 1 | 0 | 4.393256   | 8.071902  | 2.529633  |
| 103 | 1 | 0 | 3.730000   | 6.586834  | 3.263636  |
| 104 | 1 | 0 | 5.233872   | 6.514779  | 2.299342  |

RC<sub>g</sub>homo

| Center<br>Number | Atomic<br>Number | Atomic<br>Type | Coordinates (Angstroms) |           |           |
|------------------|------------------|----------------|-------------------------|-----------|-----------|
|                  |                  |                | X                       | Y         | Z         |
| 1                | 6                | 0              | -1.860733               | -0.172181 | 1.139446  |
| 2                | 6                | 0              | -1.975630               | 1.070379  | 1.776618  |
| 3                | 6                | 0              | -3.133090               | 1.346220  | 2.518633  |
| 4                | 6                | 0              | -4.130796               | 0.391663  | 2.669118  |
| 5                | 6                | 0              | -3.992018               | -0.832742 | 2.024706  |
| 6                | 6                | 0              | -2.869812               | -1.119564 | 1.255748  |
| 7                | 7                | 0              | -1.080659               | 2.145746  | 1.627390  |
| 8                | 6                | 0              | 0.192801                | 2.100738  | 1.615239  |
| 9                | 6                | 0              | 1.030301                | 3.296468  | 1.437051  |
| 10               | 6                | 0              | 2.474886                | 2.868833  | 1.324451  |
| 11               | 7                | 0              | 2.412642                | 1.421864  | 1.611009  |
| 12               | 6                | 0              | 1.144843                | 0.931875  | 1.809142  |
| 13               | 6                | 0              | 0.566880                | 4.545369  | 1.420103  |
| 14               | 8                | 0              | 0.842181                | -0.215152 | 2.083666  |
| 15               | 6                | 0              | 3.564720                | 0.605544  | 1.521226  |
| 16               | 6                | 0              | 4.638170                | 1.016052  | 0.721099  |
| 17               | 6                | 0              | 5.756167                | 0.206728  | 0.567905  |
| 18               | 6                | 0              | 5.804238                | -1.019205 | 1.219273  |
| 19               | 6                | 0              | 4.757730                | -1.434256 | 2.032379  |
| 20               | 6                | 0              | 3.641221                | -0.620963 | 2.192832  |
| 21               | 6                | 0              | 3.397192                | 3.600447  | 2.294450  |
| 22               | 35               | 0              | 7.310465                | -2.140007 | 0.988827  |
| 23               | 35               | 0              | -5.395490               | -2.097429 | 2.118967  |
| 24               | 6                | 0              | -0.567146               | 4.547981  | -1.415457 |
| 25               | 6                | 0              | -1.030387               | 3.299030  | -1.433660 |
| 26               | 6                | 0              | -0.192778               | 2.103594  | -1.613353 |
| 27               | 6                | 0              | -1.144759               | 0.934829  | -1.808252 |
| 28               | 7                | 0              | -2.412546               | 1.424440  | -1.609177 |
| 29               | 6                | 0              | -2.474895               | 2.871093  | -1.321073 |
| 30               | 7                | 0              | 1.080681                | 2.148767  | -1.625835 |
| 31               | 6                | 0              | 1.975625                | 1.073510  | -1.776036 |
| 32               | 6                | 0              | 1.860489                | -0.169595 | -1.139982 |
| 33               | 6                | 0              | 2.869390                | -1.117059 | -1.257046 |
| 34               | 6                | 0              | 3.991707                | -0.829724 | -2.025656 |
| 35               | 6                | 0              | 4.130774                | 0.395270  | -2.668890 |
| 36               | 6                | 0              | 3.133219                | 1.349876  | -2.517638 |
| 37               | 6                | 0              | -3.397600               | 3.603600  | -2.290016 |
| 38               | 6                | 0              | -3.564523               | 0.607875  | -1.520253 |
| 39               | 6                | 0              | -3.641105               | -0.617620 | -2.193696 |
| 40               | 6                | 0              | -4.757500               | -1.431243 | -2.034169 |
| 41               | 6                | 0              | -5.803814               | -1.017518 | -1.220137 |
| 42               | 6                | 0              | -5.755671               | 0.207439  | -0.566936 |
| 43               | 6                | 0              | -4.637780               | 1.017091  | -0.719216 |
| 44               | 8                | 0              | -0.842103               | -0.211840 | -2.084284 |
| 45               | 35               | 0              | -7.309907               | -2.138799 | -0.991080 |
| 46               | 35               | 0              | 5.394876                | -2.094664 | -2.121112 |
| 47               | 1                | 0              | -2.806780               | 3.010690  | -0.284048 |
| 48               | 1                | 0              | 1.219303                | 5.404891  | 1.299219  |
| 49               | 1                | 0              | -0.498012               | 4.723283  | 1.532962  |
| 50               | 1                | 0              | 0.497688                | 4.726194  | -1.528402 |
| 51               | 1                | 0              | -1.219674               | 5.407264  | -1.293428 |
| 52               | 1                | 0              | 2.807068                | 3.009563  | 0.287671  |
| 53               | 1                | 0              | 4.599582                | 1.954290  | 0.179691  |
| 54               | 1                | 0              | 6.573600                | 0.518856  | -0.073023 |
| 55               | 1                | 0              | 4.811258                | -2.388693 | 2.543983  |
| 56               | 1                | 0              | 2.826170                | -0.946474 | 2.822392  |
| 57               | 1                | 0              | -2.826208               | -0.942099 | -2.823988 |
| 58               | 1                | 0              | -4.811106               | -2.384898 | -2.547220 |
| 59               | 1                | 0              | -6.572949               | 0.518525  | 0.074698  |
| 60               | 1                | 0              | -4.599083               | 1.954504  | -0.176382 |
| 61               | 1                | 0              | 0.996645                | -0.394337 | -0.527617 |
| 62               | 1                | 0              | 2.791994                | -2.065014 | -0.736061 |
| 63               | 1                | 0              | 5.019268                | 0.609287  | -3.252514 |
| 64               | 1                | 0              | 3.232826                | 2.327118  | -2.979479 |
| 65               | 1                | 0              | -3.232477               | 2.323057  | 2.981378  |
| 66               | 1                | 0              | -5.019197               | 0.605301  | 3.253022  |
| 67               | 1                | 0              | -2.792626               | -2.067055 | 0.733894  |
| 68               | 1                | 0              | -0.997127               | -0.396542 | 0.526592  |
| 69               | 1                | 0              | -4.422872               | 3.231806  | -2.226580 |

|    |   |   |           |          |           |
|----|---|---|-----------|----------|-----------|
| 70 | 1 | 0 | -3.406646 | 4.670423 | -2.052241 |
| 71 | 1 | 0 | -3.037856 | 3.475300 | -3.314412 |
| 72 | 1 | 0 | 4.422523  | 3.228822 | 2.231006  |
| 73 | 1 | 0 | 3.406218  | 4.667511 | 2.057755  |
| 74 | 1 | 0 | 3.037095  | 3.471078 | 3.318587  |

-----  
**RCg<sub>hetero</sub>**  
 -----

| Center<br>Number | Atomic<br>Number | Atomic<br>Type | Coordinates (Angstroms) |           |           |
|------------------|------------------|----------------|-------------------------|-----------|-----------|
|                  |                  |                | X                       | Y         | Z         |
| 1                | 6                | 0              | 1.046625                | 2.042435  | 2.867204  |
| 2                | 6                | 0              | 1.398019                | 0.850292  | 2.222546  |
| 3                | 6                | 0              | 2.482092                | 0.845163  | 1.339129  |
| 4                | 6                | 0              | 3.167081                | 2.018349  | 1.045888  |
| 5                | 6                | 0              | 2.789766                | 3.193718  | 1.683187  |
| 6                | 6                | 0              | 1.743354                | 3.212975  | 2.601456  |
| 7                | 7                | 0              | 0.806954                | -0.391035 | 2.525355  |
| 8                | 6                | 0              | -0.447999               | -0.608849 | 2.553838  |
| 9                | 6                | 0              | -1.044165               | -1.885864 | 2.963329  |
| 10               | 6                | 0              | -2.500368               | -1.888240 | 2.560239  |
| 11               | 7                | 0              | -2.709270               | -0.519504 | 2.045609  |
| 12               | 6                | 0              | -1.585660               | 0.272831  | 2.065699  |
| 13               | 6                | 0              | -0.393878               | -2.843571 | 3.622588  |
| 14               | 8                | 0              | -1.494683               | 1.426940  | 1.692798  |
| 15               | 6                | 0              | -3.902870               | -0.165677 | 1.373679  |
| 16               | 6                | 0              | -4.750886               | -1.168962 | 0.891192  |
| 17               | 6                | 0              | -5.888311               | -0.844650 | 0.159856  |
| 18               | 6                | 0              | -6.184155               | 0.487428  | -0.085243 |
| 19               | 6                | 0              | -5.375186               | 1.499850  | 0.416677  |
| 20               | 6                | 0              | -4.243081               | 1.178300  | 1.152491  |
| 21               | 6                | 0              | -3.447594               | -2.212236 | 3.711298  |
| 22               | 35               | 0              | -7.682470               | 0.933872  | -1.148932 |
| 23               | 35               | 0              | 3.731882                | 4.796654  | 1.314396  |
| 24               | 6                | 0              | 0.796617                | -4.646506 | 1.409158  |
| 25               | 6                | 0              | 1.338668                | -3.648036 | 0.713858  |
| 26               | 6                | 0              | 0.585908                | -2.690358 | -0.108272 |
| 27               | 6                | 0              | 1.612503                | -1.860268 | -0.861704 |
| 28               | 7                | 0              | 2.848797                | -2.242331 | -0.389612 |
| 29               | 6                | 0              | 2.809203                | -3.309613 | 0.631417  |
| 30               | 7                | 0              | -0.685382               | -2.675713 | -0.174692 |
| 31               | 6                | 0              | -1.459755               | -1.749162 | -0.898294 |
| 32               | 6                | 0              | -1.247128               | -0.365716 | -0.866502 |
| 33               | 6                | 0              | -2.148730               | 0.496712  | -1.475913 |
| 34               | 6                | 0              | -3.242946               | -0.029010 | -2.157381 |
| 35               | 6                | 0              | -3.462895               | -1.400166 | -2.218830 |
| 36               | 6                | 0              | -2.586984               | -2.253189 | -1.558631 |
| 37               | 6                | 0              | 3.371321                | -2.843603 | 1.973740  |
| 38               | 6                | 0              | 4.075459                | -1.715308 | -0.857975 |
| 39               | 6                | 0              | 4.144513                | -0.445765 | -1.451580 |
| 40               | 6                | 0              | 5.366430                | 0.061413  | -1.878221 |
| 41               | 6                | 0              | 6.523491                | -0.690144 | -1.714405 |
| 42               | 6                | 0              | 6.474464                | -1.947097 | -1.126556 |
| 43               | 6                | 0              | 5.253481                | -2.455914 | -0.700440 |
| 44               | 8                | 0              | 1.391032                | -1.050853 | -1.740573 |
| 45               | 35               | 0              | 8.185170                | 0.008032  | -2.294088 |
| 46               | 35               | 0              | -4.477398               | 1.142671  | -2.986262 |
| 47               | 1                | 0              | 3.365919                | -4.176417 | 0.259208  |
| 48               | 1                | 0              | -0.878173               | -3.765334 | 3.931246  |
| 49               | 1                | 0              | 0.655867                | -2.713580 | 3.868318  |
| 50               | 1                | 0              | -0.278762               | -4.794440 | 1.387648  |
| 51               | 1                | 0              | 1.398438                | -5.334829 | 1.995507  |
| 52               | 1                | 0              | -2.629546               | -2.596277 | 1.731662  |
| 53               | 1                | 0              | -4.521907               | -2.216445 | 1.045175  |
| 54               | 1                | 0              | -6.526691               | -1.629255 | -0.230849 |
| 55               | 1                | 0              | -5.620794               | 2.538368  | 0.224751  |
| 56               | 1                | 0              | -3.610976               | 1.966448  | 1.532584  |
| 57               | 1                | 0              | 3.247097                | 0.141501  | -1.587920 |
| 58               | 1                | 0              | 5.413093                | 1.043171  | -2.336413 |
| 59               | 1                | 0              | 7.380232                | -2.529178 | -1.000517 |
| 60               | 1                | 0              | 5.235357                | -3.438542 | -0.244224 |
| 61               | 1                | 0              | -0.389675               | 0.042302  | -0.341456 |
| 62               | 1                | 0              | -2.003615               | 1.569618  | -1.415087 |
| 63               | 1                | 0              | -4.328227               | -1.790580 | -2.743087 |

|    |   |   |           |           |           |
|----|---|---|-----------|-----------|-----------|
| 64 | 1 | 0 | -2.760803 | -3.324713 | -1.553323 |
| 65 | 1 | 0 | 2.786096  | -0.091790 | 0.884809  |
| 66 | 1 | 0 | 3.996626  | 2.010744  | 0.346647  |
| 67 | 1 | 0 | 1.473441  | 4.137375  | 3.099615  |
| 68 | 1 | 0 | 0.226456  | 2.047497  | 3.576359  |
| 69 | 1 | 0 | -4.493217 | -2.136951 | 3.403599  |
| 70 | 1 | 0 | -3.267149 | -3.231763 | 4.062097  |
| 71 | 1 | 0 | -3.274011 | -1.520465 | 4.539841  |
| 72 | 1 | 0 | 4.403141  | -2.494962 | 1.877759  |
| 73 | 1 | 0 | 2.749120  | -2.034961 | 2.370165  |
| 74 | 1 | 0 | 3.354326  | -3.677536 | 2.681372  |

-----  
**RCg<sub>homo</sub>-in/in**  
 -----

| Center<br>Number | Atomic<br>Number | Atomic<br>Type | Coordinates (Angstroms) |           |           |
|------------------|------------------|----------------|-------------------------|-----------|-----------|
|                  |                  |                | X                       | Y         | Z         |
| 1                | 6                | 0              | -0.570630               | 1.430867  | -2.981425 |
| 2                | 6                | 0              | -1.081301               | 0.365121  | -2.229090 |
| 3                | 6                | 0              | -2.262486               | 0.551989  | -1.500565 |
| 4                | 6                | 0              | -2.886323               | 1.793314  | -1.459457 |
| 5                | 6                | 0              | -2.346891               | 2.842063  | -2.193886 |
| 6                | 6                | 0              | -1.201907               | 2.667008  | -2.965833 |
| 7                | 7                | 0              | -0.556313               | -0.939119 | -2.279411 |
| 8                | 6                | 0              | 0.680346                | -1.235098 | -2.191474 |
| 9                | 6                | 0              | 1.201027                | -2.599482 | -2.367549 |
| 10               | 6                | 0              | 2.678222                | -2.610936 | -2.038104 |
| 11               | 7                | 0              | 2.938990                | -1.205307 | -1.675396 |
| 12               | 6                | 0              | 1.866094                | -0.360547 | -1.809512 |
| 13               | 6                | 0              | 0.476500                | -3.636594 | -2.785098 |
| 14               | 8                | 0              | 1.862928                | 0.840551  | -1.619453 |
| 15               | 6                | 0              | 4.214476                | -0.776831 | -1.237705 |
| 16               | 6                | 0              | 5.369364                | -1.390295 | -1.730731 |
| 17               | 6                | 0              | 6.621545                | -1.004825 | -1.263879 |
| 18               | 6                | 0              | 6.712637                | -0.004820 | -0.303045 |
| 19               | 6                | 0              | 5.573707                | 0.616688  | 0.195673  |
| 20               | 6                | 0              | 4.325663                | 0.231457  | -0.276375 |
| 21               | 6                | 0              | 3.033209                | -3.576112 | -0.910399 |
| 22               | 35               | 0              | 8.416984                | 0.509622  | 0.347104  |
| 23               | 35               | 0              | -3.202011               | 4.532698  | -2.165398 |
| 24               | 6                | 0              | -0.692880               | -4.653363 | -0.134806 |
| 25               | 6                | 0              | -1.356401               | -3.553295 | 0.216965  |
| 26               | 6                | 0              | -0.754386               | -2.364456 | 0.836743  |
| 27               | 6                | 0              | -1.907332               | -1.482849 | 1.291163  |
| 28               | 7                | 0              | -3.054748               | -2.051107 | 0.785890  |
| 29               | 6                | 0              | -2.841000               | -3.317823 | 0.057319  |
| 30               | 7                | 0              | 0.500737                | -2.206948 | 0.979525  |
| 31               | 6                | 0              | 1.124490                | -1.061932 | 1.508544  |
| 32               | 6                | 0              | 0.777035                | 0.248916  | 1.159861  |
| 33               | 6                | 0              | 1.514264                | 1.321369  | 1.645591  |
| 34               | 6                | 0              | 2.601677                | 1.078511  | 2.478837  |
| 35               | 6                | 0              | 2.969718                | -0.214083 | 2.835062  |
| 36               | 6                | 0              | 2.240150                | -1.281240 | 2.327115  |
| 37               | 6                | 0              | -3.256240               | -3.216322 | -1.409916 |
| 38               | 6                | 0              | -4.348949               | -1.508424 | 0.962779  |
| 39               | 6                | 0              | -4.534020               | -0.135831 | 1.182677  |
| 40               | 6                | 0              | -5.815584               | 0.383752  | 1.319763  |
| 41               | 6                | 0              | -6.916037               | -0.460722 | 1.236322  |
| 42               | 6                | 0              | -6.751286               | -1.822244 | 1.018504  |
| 43               | 6                | 0              | -5.469760               | -2.342847 | 0.882732  |
| 44               | 8                | 0              | -1.838867               | -0.493900 | 1.993760  |
| 45               | 35               | 0              | -8.660394               | 0.253411  | 1.417925  |
| 46               | 35               | 0              | 3.689285                | 2.529494  | 3.028507  |
| 47               | 1                | 0              | -3.398842               | -4.114812 | 0.560502  |
| 48               | 1                | 0              | 0.908072                | -4.624145 | -2.922072 |
| 49               | 1                | 0              | -0.578513               | -3.506395 | -3.006290 |
| 50               | 1                | 0              | 0.378166                | -4.716478 | 0.030761  |
| 51               | 1                | 0              | -1.193748               | -5.508890 | -0.579301 |
| 52               | 1                | 0              | 3.253865                | -2.857901 | -2.938920 |
| 53               | 1                | 0              | 5.301556                | -2.171906 | -2.480238 |
| 54               | 1                | 0              | 7.517891                | -1.480493 | -1.645139 |
| 55               | 1                | 0              | 5.645804                | 1.383341  | 0.960515  |
| 56               | 1                | 0              | 3.434488                | 0.708618  | 0.105957  |
| 57               | 1                | 0              | -3.679246               | 0.522286  | 1.258876  |



|    |   |   |           |           |           |
|----|---|---|-----------|-----------|-----------|
| 58 | 1 | 0 | -5.953628 | 1.445855  | 1.489493  |
| 59 | 1 | 0 | -7.614012 | -2.475589 | 0.955885  |
| 60 | 1 | 0 | -5.357954 | -3.407710 | 0.714715  |
| 61 | 1 | 0 | -0.051531 | 0.432260  | 0.483559  |
| 62 | 1 | 0 | 1.265341  | 2.334448  | 1.350310  |
| 63 | 1 | 0 | 3.834746  | -0.383406 | 3.466275  |
| 64 | 1 | 0 | 2.524163  | -2.302149 | 2.562248  |
| 65 | 1 | 0 | -2.694936 | -0.291101 | -0.971111 |
| 66 | 1 | 0 | -3.795007 | 1.935081  | -0.884271 |
| 67 | 1 | 0 | -0.806052 | 3.491859  | -3.547647 |
| 68 | 1 | 0 | 0.321260  | 1.287110  | -3.579818 |
| 69 | 1 | 0 | -4.305128 | -2.924573 | -1.510478 |
| 70 | 1 | 0 | -2.623844 | -2.483664 | -1.921899 |
| 71 | 1 | 0 | -3.122909 | -4.189601 | -1.891294 |
| 72 | 1 | 0 | 4.097926  | -3.530708 | -0.667832 |
| 73 | 1 | 0 | 2.443607  | -3.332907 | -0.021936 |
| 74 | 1 | 0 | 2.799813  | -4.597650 | -1.225170 |

-----  
**TSghomo**  
 -----

| Center<br>Number | Atomic<br>Number | Atomic<br>Type | Coordinates (Angstroms) |           |           |
|------------------|------------------|----------------|-------------------------|-----------|-----------|
|                  |                  |                | X                       | Y         | Z         |
| 1                | 6                | 0              | -1.747951               | -0.371686 | 1.190825  |
| 2                | 6                | 0              | -1.887916               | 0.940902  | 1.672690  |
| 3                | 6                | 0              | -3.101002               | 1.305078  | 2.283075  |
| 4                | 6                | 0              | -4.132878               | 0.390679  | 2.440200  |
| 5                | 6                | 0              | -3.976855               | -0.891380 | 1.924815  |
| 6                | 6                | 0              | -2.794733               | -1.277322 | 1.299211  |
| 7                | 7                | 0              | -0.984654               | 1.989230  | 1.485625  |
| 8                | 6                | 0              | 0.308634                | 1.953832  | 1.458336  |
| 9                | 6                | 0              | 1.053567                | 3.124367  | 1.134430  |
| 10               | 6                | 0              | 2.522209                | 2.812601  | 1.108831  |
| 11               | 7                | 0              | 2.551275                | 1.378760  | 1.457544  |
| 12               | 6                | 0              | 1.303715                | 0.838461  | 1.684429  |
| 13               | 6                | 0              | 0.412168                | 4.331889  | 0.892784  |
| 14               | 8                | 0              | 1.052234                | -0.308306 | 2.009747  |
| 15               | 6                | 0              | 3.745211                | 0.624904  | 1.389374  |
| 16               | 6                | 0              | 4.845781                | 1.131800  | 0.686124  |
| 17               | 6                | 0              | 6.009027                | 0.384413  | 0.549143  |
| 18               | 6                | 0              | 6.080795                | -0.877196 | 1.121783  |
| 19               | 6                | 0              | 5.011926                | -1.388786 | 1.845160  |
| 20               | 6                | 0              | 3.850753                | -0.638774 | 1.990149  |
| 21               | 6                | 0              | 3.320663                | 3.652746  | 2.106377  |
| 22               | 35               | 0              | 7.639671                | -1.922525 | 0.885141  |
| 23               | 35               | 0              | -5.421041               | -2.108439 | 2.019656  |
| 24               | 6                | 0              | -0.412176               | 4.331692  | -0.893733 |
| 25               | 6                | 0              | -1.053557               | 3.124099  | -1.135084 |
| 26               | 6                | 0              | -0.308593               | 1.953494  | -1.458648 |
| 27               | 6                | 0              | -1.303646               | 0.838056  | -1.684530 |
| 28               | 7                | 0              | -2.551221               | 1.378372  | -1.457764 |
| 29               | 6                | 0              | -2.522183               | 2.812282  | -1.109311 |
| 30               | 7                | 0              | 0.984698                | 1.988916  | -1.485926 |
| 31               | 6                | 0              | 1.887981                | 0.940557  | -1.672713 |
| 32               | 6                | 0              | 1.748001                | -0.371921 | -1.190553 |
| 33               | 6                | 0              | 2.794728                | -1.277628 | -1.298850 |
| 34               | 6                | 0              | 3.976828                | -0.891855 | -1.924603 |
| 35               | 6                | 0              | 4.132890                | 0.390107  | -2.440212 |
| 36               | 6                | 0              | 3.101056                | 1.304578  | -2.283207 |
| 37               | 6                | 0              | -3.320805               | 3.652210  | -2.106899 |
| 38               | 6                | 0              | -3.745160               | 0.624542  | -1.389472 |
| 39               | 6                | 0              | -3.850694               | -0.639251 | -1.990002 |
| 40               | 6                | 0              | -5.011860               | -1.389248 | -1.844862 |
| 41               | 6                | 0              | -6.080749               | -0.877500 | -1.121632 |
| 42               | 6                | 0              | -6.008977               | 0.384208  | -0.549206 |
| 43               | 6                | 0              | -4.845722               | 1.131558  | -0.686290 |
| 44               | 8                | 0              | -1.052140               | -0.308754 | -2.009675 |
| 45               | 35               | 0              | -7.639667               | -1.922745 | -0.884894 |
| 46               | 35               | 0              | 5.420919                | -2.109040 | -2.019358 |
| 47               | 1                | 0              | -2.910269               | 2.942631  | -0.089848 |
| 48               | 1                | 0              | 1.007422                | 5.235378  | 0.788572  |
| 49               | 1                | 0              | -0.544850               | 4.448790  | 1.394324  |
| 50               | 1                | 0              | 0.544841                | 4.448466  | -1.395303 |
| 51               | 1                | 0              | -1.007433               | 5.235198  | -0.789710 |

|    |   |   |           |           |           |
|----|---|---|-----------|-----------|-----------|
| 52 | 1 | 0 | 2.910388  | 2.942826  | 0.089389  |
| 53 | 1 | 0 | 4.799292  | 2.100685  | 0.203961  |
| 54 | 1 | 0 | 6.845377  | 0.776776  | -0.018850 |
| 55 | 1 | 0 | 5.080450  | -2.372135 | 2.296869  |
| 56 | 1 | 0 | 3.021197  | -1.042486 | 2.550329  |
| 57 | 1 | 0 | -3.021142 | -1.043054 | -2.550123 |
| 58 | 1 | 0 | -5.080389 | -2.372671 | -2.296407 |
| 59 | 1 | 0 | -6.845340 | 0.776677  | 0.018696  |
| 60 | 1 | 0 | -4.799244 | 2.100554  | -0.204344 |
| 61 | 1 | 0 | 0.829096  | -0.678133 | -0.709613 |
| 62 | 1 | 0 | 2.697480  | -2.276911 | -0.889045 |
| 63 | 1 | 0 | 5.062899  | 0.677332  | -2.918633 |
| 64 | 1 | 0 | 3.210853  | 2.324783  | -2.638409 |
| 65 | 1 | 0 | -3.210786 | 2.325358  | 2.638068  |
| 66 | 1 | 0 | -5.062895 | 0.678031  | 2.918530  |
| 67 | 1 | 0 | -2.697502 | -2.276682 | 0.889591  |
| 68 | 1 | 0 | -0.829041 | -0.678015 | 0.709969  |
| 69 | 1 | 0 | -4.370809 | 3.351100  | -2.132453 |
| 70 | 1 | 0 | -3.272119 | 4.706799  | -1.822820 |
| 71 | 1 | 0 | -2.898606 | 3.537851  | -3.108863 |
| 72 | 1 | 0 | 4.370640  | 3.351580  | 2.132244  |
| 73 | 1 | 0 | 3.272109  | 4.707263  | 1.822003  |
| 74 | 1 | 0 | 2.898230  | 3.538684  | 3.108275  |

-----  
**TSGhetero**  
 -----

| Center<br>Number | Atomic<br>Number | Atomic<br>Type | Coordinates (Angstroms) |           |           |
|------------------|------------------|----------------|-------------------------|-----------|-----------|
|                  |                  |                | X                       | Y         | Z         |
| 1                | 6                | 0              | 1.012519                | 2.440090  | 2.445012  |
| 2                | 6                | 0              | 1.451727                | 1.197323  | 1.965039  |
| 3                | 6                | 0              | 2.589598                | 1.154131  | 1.150642  |
| 4                | 6                | 0              | 3.239242                | 2.320413  | 0.763335  |
| 5                | 6                | 0              | 2.771224                | 3.540055  | 1.234530  |
| 6                | 6                | 0              | 1.669869                | 3.607291  | 2.084062  |
| 7                | 7                | 0              | 0.896855                | -0.022945 | 2.382400  |
| 8                | 6                | 0              | -0.369101               | -0.266942 | 2.411568  |
| 9                | 6                | 0              | -0.913121               | -1.482093 | 2.935281  |
| 10               | 6                | 0              | -2.401235               | -1.507133 | 2.728698  |
| 11               | 7                | 0              | -2.654703               | -0.252047 | 1.996133  |
| 12               | 6                | 0              | -1.525985               | 0.521441  | 1.826768  |
| 13               | 6                | 0              | -0.133655               | -2.411494 | 3.618368  |
| 14               | 8                | 0              | -1.450558               | 1.600032  | 1.270272  |
| 15               | 6                | 0              | -3.893248               | -0.009231 | 1.358994  |
| 16               | 6                | 0              | -4.846505               | -1.033600 | 1.276044  |
| 17               | 6                | 0              | -6.025519               | -0.853482 | 0.562137  |
| 18               | 6                | 0              | -6.263835               | 0.359016  | -0.067757 |
| 19               | 6                | 0              | -5.359972               | 1.406401  | 0.049922  |
| 20               | 6                | 0              | -4.183595               | 1.230664  | 0.766009  |
| 21               | 6                | 0              | -3.180573               | -1.559350 | 4.044878  |
| 22               | 35               | 0              | -7.811177               | 0.579238  | -1.133562 |
| 23               | 35               | 0              | 3.657830                | 5.138631  | 0.731113  |
| 24               | 6                | 0              | 0.613467                | -3.716707 | 2.413640  |
| 25               | 6                | 0              | 1.306240                | -3.072753 | 1.394970  |
| 26               | 6                | 0              | 0.621785                | -2.392748 | 0.356136  |
| 27               | 6                | 0              | 1.671035                | -1.794324 | -0.555598 |
| 28               | 7                | 0              | 2.892798                | -2.106186 | 0.012028  |
| 29               | 6                | 0              | 2.790546                | -2.910076 | 1.242839  |
| 30               | 7                | 0              | -0.676120               | -2.380689 | 0.323407  |
| 31               | 6                | 0              | -1.478403               | -1.680631 | -0.583696 |
| 32               | 6                | 0              | -1.230464               | -0.380017 | -1.054767 |
| 33               | 6                | 0              | -2.175918               | 0.272995  | -1.832550 |
| 34               | 6                | 0              | -3.357889               | -0.381954 | -2.174751 |
| 35               | 6                | 0              | -3.616990               | -1.676271 | -1.742409 |
| 36               | 6                | 0              | -2.687056               | -2.306487 | -0.926105 |
| 37               | 6                | 0              | 3.470619                | -2.260229 | 2.447166  |
| 38               | 6                | 0              | 4.140100                | -1.780200 | -0.566092 |
| 39               | 6                | 0              | 4.287819                | -0.640322 | -1.369578 |
| 40               | 6                | 0              | 5.529902                | -0.317709 | -1.903352 |
| 41               | 6                | 0              | 6.628254                | -1.125350 | -1.633872 |
| 42               | 6                | 0              | 6.500831                | -2.256714 | -0.838857 |
| 43               | 6                | 0              | 5.257801                | -2.582586 | -0.309166 |
| 44               | 8                | 0              | 1.497550                | -1.198080 | -1.600493 |
| 45               | 35               | 0              | 8.321342                | -0.675686 | -2.354763 |

|    |    |   |           |           |           |
|----|----|---|-----------|-----------|-----------|
| 46 | 35 | 0 | -4.663856 | 0.520672  | -3.204855 |
| 47 | 1  | 0 | 3.235065  | -3.897599 | 1.057697  |
| 48 | 1  | 0 | -0.639617 | -3.134609 | 4.253815  |
| 49 | 1  | 0 | 0.804909  | -2.030063 | 4.011707  |
| 50 | 1  | 0 | -0.355349 | -4.116993 | 2.124252  |
| 51 | 1  | 0 | 1.174431  | -4.315495 | 3.127718  |
| 52 | 1  | 0 | -2.664360 | -2.354953 | 2.081005  |
| 53 | 1  | 0 | -4.667668 | -2.002419 | 1.725388  |
| 54 | 1  | 0 | -6.740589 | -1.664543 | 0.480347  |
| 55 | 1  | 0 | -5.560065 | 2.355555  | -0.434700 |
| 56 | 1  | 0 | -3.477422 | 2.043097  | 0.835330  |
| 57 | 1  | 0 | 3.433428  | -0.012130 | -1.583038 |
| 58 | 1  | 0 | 5.640082  | 0.564868  | -2.523669 |
| 59 | 1  | 0 | 7.361715  | -2.883348 | -0.635092 |
| 60 | 1  | 0 | 5.170206  | -3.472686 | 0.303547  |
| 61 | 1  | 0 | -0.318755 | 0.134932  | -0.775708 |
| 62 | 1  | 0 | -2.003242 | 1.291253  | -2.162963 |
| 63 | 1  | 0 | -4.548084 | -2.165016 | -2.007183 |
| 64 | 1  | 0 | -2.878918 | -3.303315 | -0.540440 |
| 65 | 1  | 0 | 2.961822  | 0.191492  | 0.819736  |
| 66 | 1  | 0 | 4.108855  | 2.275522  | 0.116116  |
| 67 | 1  | 0 | 1.328370  | 4.566470  | 2.457081  |
| 68 | 1  | 0 | 0.154080  | 2.486404  | 3.105717  |
| 69 | 1  | 0 | -4.256383 | -1.470499 | 3.876347  |
| 70 | 1  | 0 | -2.990805 | -2.508242 | 4.553660  |
| 71 | 1  | 0 | -2.861520 | -0.741006 | 4.695925  |
| 72 | 1  | 0 | 4.535386  | -2.100524 | 2.258723  |
| 73 | 1  | 0 | 2.988124  | -1.307103 | 2.674640  |
| 74 | 1  | 0 | 3.376607  | -2.920050 | 3.315430  |

-----  
**TS<sub>homo</sub>-in/in**  
 -----

| Center<br>Number | Atomic<br>Number | Atomic<br>Type | Coordinates (Angstroms) |           |           |
|------------------|------------------|----------------|-------------------------|-----------|-----------|
|                  |                  |                | X                       | Y         | Z         |
| 1                | 6                | 0              | -0.567747               | 1.659656  | -2.792601 |
| 2                | 6                | 0              | -1.150201               | 0.578272  | -2.112775 |
| 3                | 6                | 0              | -2.373295               | 0.779605  | -1.457310 |
| 4                | 6                | 0              | -2.967242               | 2.035090  | -1.411547 |
| 5                | 6                | 0              | -2.354742               | 3.093784  | -2.069759 |
| 6                | 6                | 0              | -1.167019               | 2.910935  | -2.772939 |
| 7                | 7                | 0              | -0.656987               | -0.732948 | -2.173764 |
| 8                | 6                | 0              | 0.594001                | -1.046869 | -2.075369 |
| 9                | 6                | 0              | 1.059560                | -2.388857 | -2.237609 |
| 10               | 6                | 0              | 2.549442                | -2.454562 | -2.039620 |
| 11               | 7                | 0              | 2.866183                | -1.083502 | -1.613304 |
| 12               | 6                | 0              | 1.803327                | -0.212747 | -1.678972 |
| 13               | 6                | 0              | 0.222734                | -3.447795 | -2.586841 |
| 14               | 8                | 0              | 1.837860                | 0.978232  | -1.437416 |
| 15               | 6                | 0              | 4.168038                | -0.693253 | -1.225848 |
| 16               | 6                | 0              | 5.287101                | -1.285627 | -1.816626 |
| 17               | 6                | 0              | 6.567241                | -0.940924 | -1.394960 |
| 18               | 6                | 0              | 6.721218                | -0.000041 | -0.383992 |
| 19               | 6                | 0              | 5.618044                | 0.604287  | 0.208692  |
| 20               | 6                | 0              | 4.342237                | 0.258927  | -0.217326 |
| 21               | 6                | 0              | 3.008357                | -3.523597 | -1.051556 |
| 22               | 35               | 0              | 8.464944                | 0.457351  | 0.202735  |
| 23               | 35               | 0              | -3.160433               | 4.809050  | -2.031574 |
| 24               | 6                | 0              | -0.544217               | -4.230511 | -1.040983 |
| 25               | 6                | 0              | -1.316813               | -3.293105 | -0.357044 |
| 26               | 6                | 0              | -0.748823               | -2.299264 | 0.481271  |
| 27               | 6                | 0              | -1.899754               | -1.489943 | 1.048866  |
| 28               | 7                | 0              | -3.047625               | -1.992427 | 0.466748  |
| 29               | 6                | 0              | -2.807296               | -3.128570 | -0.436753 |
| 30               | 7                | 0              | 0.531666                | -2.227202 | 0.684079  |
| 31               | 6                | 0              | 1.163686                | -1.186565 | 1.374952  |
| 32               | 6                | 0              | 0.812020                | 0.169090  | 1.270806  |
| 33               | 6                | 0              | 1.566834                | 1.142868  | 1.911660  |
| 34               | 6                | 0              | 2.677618                | 0.763323  | 2.658854  |
| 35               | 6                | 0              | 3.046131                | -0.572082 | 2.786343  |
| 36               | 6                | 0              | 2.297754                | -1.536179 | 2.126562  |
| 37               | 6                | 0              | -3.327465               | -2.888684 | -1.854394 |
| 38               | 6                | 0              | -4.350289               | -1.533743 | 0.764721  |
| 39               | 6                | 0              | -4.573967               | -0.207086 | 1.160154  |

|    |    |   |           |           |           |
|----|----|---|-----------|-----------|-----------|
| 40 | 6  | 0 | -5.864875 | 0.235899  | 1.422078  |
| 41 | 6  | 0 | -6.936091 | -0.638595 | 1.284359  |
| 42 | 6  | 0 | -6.733616 | -1.954227 | 0.888738  |
| 43 | 6  | 0 | -5.441978 | -2.399276 | 0.632262  |
| 44 | 8  | 0 | -1.850336 | -0.613322 | 1.888619  |
| 45 | 35 | 0 | -8.694009 | -0.029783 | 1.640416  |
| 46 | 35 | 0 | 3.791590  | 2.100339  | 3.406654  |
| 47 | 1  | 0 | -3.284692 | -4.024190 | -0.015799 |
| 48 | 1  | 0 | 0.695108  | -4.352241 | -2.965826 |
| 49 | 1  | 0 | -0.696623 | -3.166811 | -3.093810 |
| 50 | 1  | 0 | 0.390364  | -4.499937 | -0.555406 |
| 51 | 1  | 0 | -1.065406 | -5.055321 | -1.523007 |
| 52 | 1  | 0 | 3.024153  | -2.641328 | -3.015066 |
| 53 | 1  | 0 | 5.167534  | -2.017619 | -2.609073 |
| 54 | 1  | 0 | 7.436408  | -1.401125 | -1.850891 |
| 55 | 1  | 0 | 5.740957  | 1.323002  | 1.012494  |
| 56 | 1  | 0 | 3.477065  | 0.721391  | 0.237238  |
| 57 | 1  | 0 | -3.740625 | 0.473221  | 1.274403  |
| 58 | 1  | 0 | -6.033568 | 1.261954  | 1.729630  |
| 59 | 1  | 0 | -7.574220 | -2.630839 | 0.784601  |
| 60 | 1  | 0 | -5.296822 | -3.430849 | 0.331834  |
| 61 | 1  | 0 | -0.031307 | 0.466726  | 0.657064  |
| 62 | 1  | 0 | 1.314821  | 2.191476  | 1.800925  |
| 63 | 1  | 0 | 3.924165  | -0.845810 | 3.360395  |
| 64 | 1  | 0 | 2.576740  | -2.583171 | 2.191945  |
| 65 | 1  | 0 | -2.859533 | -0.065208 | -0.982856 |
| 66 | 1  | 0 | -3.905258 | 2.180666  | -0.886113 |
| 67 | 1  | 0 | -0.713270 | 3.742998  | -3.299755 |
| 68 | 1  | 0 | 0.354489  | 1.515222  | -3.342160 |
| 69 | 1  | 0 | -4.403196 | -2.695255 | -1.849591 |
| 70 | 1  | 0 | -2.802706 | -2.041540 | -2.302982 |
| 71 | 1  | 0 | -3.149218 | -3.780325 | -2.464018 |
| 72 | 1  | 0 | 4.094406  | -3.511117 | -0.935038 |
| 73 | 1  | 0 | 2.530450  | -3.361845 | -0.084288 |
| 74 | 1  | 0 | 2.724211  | -4.510171 | -1.431815 |

-----  
**5ghomo**  
 -----

| Center<br>Number | Atomic<br>Number | Atomic<br>Type | Coordinates (Angstroms) |           |           |
|------------------|------------------|----------------|-------------------------|-----------|-----------|
|                  |                  |                | X                       | Y         | Z         |
| 1                | 6                | 0              | 2.060260                | -0.118734 | -1.058537 |
| 2                | 6                | 0              | 2.031901                | 1.270166  | -1.206732 |
| 3                | 6                | 0              | 3.113719                | 1.912721  | -1.815746 |
| 4                | 6                | 0              | 4.242705                | 1.195607  | -2.203046 |
| 5                | 6                | 0              | 4.267739                | -0.178132 | -1.991625 |
| 6                | 6                | 0              | 3.174810                | -0.848783 | -1.455187 |
| 7                | 7                | 0              | 0.981550                | 2.062938  | -0.646760 |
| 8                | 6                | 0              | -0.295879               | 2.181841  | -1.181478 |
| 9                | 6                | 0              | -1.098604               | 3.216114  | -0.897114 |
| 10               | 6                | 0              | -2.523345               | 2.868621  | -1.201489 |
| 11               | 7                | 0              | -2.428503               | 1.501816  | -1.725918 |
| 12               | 6                | 0              | -1.113320               | 1.051062  | -1.706527 |
| 13               | 6                | 0              | -0.691608               | 4.401417  | -0.088615 |
| 14               | 8                | 0              | -0.728159               | -0.068543 | -1.993706 |
| 15               | 6                | 0              | -3.540027               | 0.631486  | -1.727134 |
| 16               | 6                | 0              | -4.707891               | 0.980573  | -1.033660 |
| 17               | 6                | 0              | -5.770235               | 0.090762  | -0.936938 |
| 18               | 6                | 0              | -5.672370               | -1.157784 | -1.535838 |
| 19               | 6                | 0              | -4.540950               | -1.508111 | -2.261457 |
| 20               | 6                | 0              | -3.481778               | -0.613417 | -2.369557 |
| 21               | 6                | 0              | -3.224931               | 3.816590  | -2.168818 |
| 22               | 35               | 0              | -7.095204               | -2.393499 | -1.352558 |
| 23               | 35               | 0              | 5.848283                | -1.151751 | -2.361024 |
| 24               | 6                | 0              | 0.695919                | 4.200382  | 0.567654  |
| 25               | 6                | 0              | 1.090898                | 2.730313  | 0.698562  |
| 26               | 6                | 0              | 0.204419                | 1.829549  | 1.537629  |
| 27               | 6                | 0              | 1.082309                | 0.667573  | 1.970915  |
| 28               | 7                | 0              | 2.384299                | 1.064812  | 1.748743  |
| 29               | 6                | 0              | 2.472355                | 2.475123  | 1.310861  |
| 30               | 7                | 0              | -1.045272               | 2.013190  | 1.657068  |
| 31               | 6                | 0              | -2.010652               | 1.023402  | 1.920796  |
| 32               | 6                | 0              | -2.009702               | -0.183842 | 1.208397  |
| 33               | 6                | 0              | -3.106790               | -1.032805 | 1.258715  |

|    |    |   |           |           |           |
|----|----|---|-----------|-----------|-----------|
| 34 | 6  | 0 | -4.203229 | -0.680540 | 2.037634  |
| 35 | 6  | 0 | -4.217548 | 0.501392  | 2.770981  |
| 36 | 6  | 0 | -3.127709 | 1.361531  | 2.693152  |
| 37 | 6  | 0 | 2.809153  | 3.382538  | 2.489493  |
| 38 | 6  | 0 | 3.508751  | 0.209260  | 1.705450  |
| 39 | 6  | 0 | 3.391203  | -1.172528 | 1.924820  |
| 40 | 6  | 0 | 4.472116  | -2.012480 | 1.684290  |
| 41 | 6  | 0 | 5.678706  | -1.485617 | 1.241659  |
| 42 | 6  | 0 | 5.834230  | -0.115410 | 1.088433  |
| 43 | 6  | 0 | 4.756700  | 0.727782  | 1.330393  |
| 44 | 8  | 0 | 0.699946  | -0.385464 | 2.443665  |
| 45 | 35 | 0 | 7.118582  | -2.639987 | 0.828197  |
| 46 | 35 | 0 | -5.732732 | -1.796588 | 2.022967  |
| 47 | 1  | 0 | 3.235648  | 2.564253  | 0.538978  |
| 48 | 1  | 0 | -1.450997 | 4.554487  | 0.685521  |
| 49 | 1  | 0 | -0.678087 | 5.310781  | -0.701425 |
| 50 | 1  | 0 | 0.700503  | 4.673940  | 1.553013  |
| 51 | 1  | 0 | 1.473446  | 4.685368  | -0.033758 |
| 52 | 1  | 0 | -3.049032 | 2.846939  | -0.235557 |
| 53 | 1  | 0 | -4.796783 | 1.936124  | -0.531179 |
| 54 | 1  | 0 | -6.656164 | 0.359353  | -0.372008 |
| 55 | 1  | 0 | -4.481924 | -2.477678 | -2.743764 |
| 56 | 1  | 0 | -2.599761 | -0.890950 | -2.927892 |
| 57 | 1  | 0 | 2.450266  | -1.592939 | 2.246906  |
| 58 | 1  | 0 | 4.364637  | -3.082182 | 1.826770  |
| 59 | 1  | 0 | 6.783560  | 0.295655  | 0.763289  |
| 60 | 1  | 0 | 4.908831  | 1.791852  | 1.198906  |
| 61 | 1  | 0 | -1.166169 | -0.433252 | 0.572204  |
| 62 | 1  | 0 | -3.124249 | -1.943989 | 0.670295  |
| 63 | 1  | 0 | -5.084489 | 0.762683  | 3.367611  |
| 64 | 1  | 0 | -3.140406 | 2.312048  | 3.217050  |
| 65 | 1  | 0 | 3.079283  | 2.990289  | -1.950230 |
| 66 | 1  | 0 | 5.098005  | 1.699155  | -2.639342 |
| 67 | 1  | 0 | 3.214610  | -1.921213 | -1.300514 |
| 68 | 1  | 0 | 1.220333  | -0.623965 | -0.593889 |
| 69 | 1  | 0 | 3.722421  | 3.028524  | 2.975262  |
| 70 | 1  | 0 | 2.972515  | 4.410610  | 2.156794  |
| 71 | 1  | 0 | 2.004609  | 3.372818  | 3.232043  |
| 72 | 1  | 0 | -4.249868 | 3.488780  | -2.363350 |
| 73 | 1  | 0 | -3.259912 | 4.824262  | -1.744708 |
| 74 | 1  | 0 | -2.680124 | 3.849125  | -3.115961 |

5ghetero

| Center Number | Atomic Number | Atomic Type | Coordinates (Angstroms) |           |           |
|---------------|---------------|-------------|-------------------------|-----------|-----------|
|               |               |             | X                       | Y         | Z         |
| 1             | 6             | 0           | -0.800476               | 4.685283  | 0.771083  |
| 2             | 6             | 0           | 0.067968                | 3.624578  | 0.503207  |
| 3             | 6             | 0           | 0.895681                | 3.668850  | -0.620166 |
| 4             | 6             | 0           | 0.823380                | 4.743413  | -1.499394 |
| 5             | 6             | 0           | -0.053543               | 5.786341  | -1.225376 |
| 6             | 6             | 0           | -0.861731               | 5.770637  | -0.093467 |
| 7             | 7             | 0           | 0.224654                | 2.554458  | 1.413258  |
| 8             | 6             | 0           | -0.696993               | 1.718704  | 1.646275  |
| 9             | 6             | 0           | -0.567006               | 0.542003  | 2.600431  |
| 10            | 6             | 0           | -2.055476               | 0.194636  | 2.854693  |
| 11            | 7             | 0           | -2.728726               | 0.603948  | 1.602983  |
| 12            | 6             | 0           | -2.038532               | 1.587201  | 0.939524  |
| 13            | 6             | 0           | 0.216032                | 0.848295  | 3.884920  |
| 14            | 8             | 0           | -2.368960               | 2.188572  | -0.063171 |
| 15            | 6             | 0           | -3.813321               | -0.128960 | 1.070519  |
| 16            | 6             | 0           | -4.430758               | -1.116883 | 1.848954  |
| 17            | 6             | 0           | -5.355534               | -1.987591 | 1.283685  |
| 18            | 6             | 0           | -5.684273               | -1.856527 | -0.058123 |
| 19            | 6             | 0           | -5.149950               | -0.826394 | -0.821305 |
| 20            | 6             | 0           | -4.221513               | 0.040452  | -0.262099 |
| 21            | 6             | 0           | -2.691344               | 0.905729  | 4.046068  |
| 22            | 35            | 0           | -6.840360               | -3.111216 | -0.873449 |
| 23            | 35            | 0           | -0.142130               | 7.265397  | -2.409523 |
| 24            | 6             | 0           | 1.690725                | 1.199992  | 3.639896  |
| 25            | 6             | 0           | 2.238737                | 0.311207  | 2.581046  |
| 26            | 6             | 0           | 1.477185                | -0.473256 | 1.805250  |
| 27            | 6             | 0           | 2.352417                | -1.259784 | 0.885910  |

|    |    |   |           |           |           |
|----|----|---|-----------|-----------|-----------|
| 28 | 7  | 0 | 3.643107  | -0.823054 | 1.137853  |
| 29 | 6  | 0 | 3.684266  | 0.180903  | 2.204967  |
| 30 | 7  | 0 | 0.092880  | -0.597592 | 1.889566  |
| 31 | 6  | 0 | -0.619136 | -1.263951 | 0.831819  |
| 32 | 6  | 0 | -0.668688 | -0.742739 | -0.464785 |
| 33 | 6  | 0 | -1.453207 | -1.351926 | -1.435475 |
| 34 | 6  | 0 | -2.180396 | -2.494036 | -1.101780 |
| 35 | 6  | 0 | -2.105990 | -3.053642 | 0.164217  |
| 36 | 6  | 0 | -1.313619 | -2.433156 | 1.128776  |
| 37 | 6  | 0 | 4.279061  | 1.507521  | 1.732744  |
| 38 | 6  | 0 | 4.800669  | -1.323378 | 0.513747  |
| 39 | 6  | 0 | 4.750178  | -1.882319 | -0.771543 |
| 40 | 6  | 0 | 5.908537  | -2.356215 | -1.374572 |
| 41 | 6  | 0 | 7.123930  | -2.264575 | -0.706861 |
| 42 | 6  | 0 | 7.195945  | -1.706853 | 0.562297  |
| 43 | 6  | 0 | 6.035393  | -1.242438 | 1.170513  |
| 44 | 8  | 0 | 2.024842  | -2.121045 | 0.090323  |
| 45 | 35 | 0 | 8.702565  | -2.904124 | -1.540387 |
| 46 | 35 | 0 | -3.334541 | -3.273519 | -2.384393 |
| 47 | 1  | 0 | 4.259159  | -0.208458 | 3.056333  |
| 48 | 1  | 0 | 0.150019  | -0.041139 | 4.522314  |
| 49 | 1  | 0 | -0.271870 | 1.671219  | 4.411688  |
| 50 | 1  | 0 | 2.251309  | 1.081069  | 4.574938  |
| 51 | 1  | 0 | 1.785704  | 2.248477  | 3.336239  |
| 52 | 1  | 0 | -2.146873 | -0.886944 | 2.966840  |
| 53 | 1  | 0 | -4.177875 | -1.245938 | 2.894650  |
| 54 | 1  | 0 | -5.800577 | -2.773354 | 1.883614  |
| 55 | 1  | 0 | -5.428337 | -0.719919 | -1.863862 |
| 56 | 1  | 0 | -3.786906 | 0.820199  | -0.869333 |
| 57 | 1  | 0 | 3.805577  | -1.951130 | -1.292260 |
| 58 | 1  | 0 | 5.864104  | -2.788404 | -2.368145 |
| 59 | 1  | 0 | 8.146911  | -1.638983 | 1.078648  |
| 60 | 1  | 0 | 6.102547  | -0.821539 | 2.167426  |
| 61 | 1  | 0 | -0.106814 | 0.156524  | -0.707640 |
| 62 | 1  | 0 | -1.517274 | -0.937847 | -2.435580 |
| 63 | 1  | 0 | -2.670864 | -3.948234 | 0.401361  |
| 64 | 1  | 0 | -1.236882 | -2.854871 | 2.126362  |
| 65 | 1  | 0 | 1.583741  | 2.850453  | -0.807888 |
| 66 | 1  | 0 | 1.450276  | 4.774134  | -2.383470 |
| 67 | 1  | 0 | -1.536226 | 6.595570  | 0.106942  |
| 68 | 1  | 0 | -1.427123 | 4.654970  | 1.657122  |
| 69 | 1  | 0 | -3.767997 | 0.716354  | 4.053811  |
| 70 | 1  | 0 | -2.272092 | 0.549252  | 4.989789  |
| 71 | 1  | 0 | -2.545445 | 1.988814  | 3.978758  |
| 72 | 1  | 0 | 5.309090  | 1.384271  | 1.388250  |
| 73 | 1  | 0 | 3.674295  | 1.906454  | 0.913253  |
| 74 | 1  | 0 | 4.274566  | 2.228900  | 2.554740  |

-----  
**5g<sub>homo</sub>-in/in**  
 -----

| Center Number | Atomic Number | Atomic Type | Coordinates (Angstroms) |           |           |
|---------------|---------------|-------------|-------------------------|-----------|-----------|
|               |               |             | X                       | Y         | Z         |
| 1             | 6             | 0           | -4.278375               | -3.029376 | -1.135352 |
| 2             | 6             | 0           | -3.063339               | -3.241939 | -0.478157 |
| 3             | 6             | 0           | -3.012278               | -4.092150 | 0.628831  |
| 4             | 6             | 0           | -4.174146               | -4.680548 | 1.115351  |
| 5             | 6             | 0           | -5.375676               | -4.449153 | 0.456347  |
| 6             | 6             | 0           | -5.437341               | -3.636934 | -0.671889 |
| 7             | 7             | 0           | -1.842049               | -2.720861 | -0.958418 |
| 8             | 6             | 0           | -1.667386               | -1.491287 | -1.192260 |
| 9             | 6             | 0           | -0.364975               | -0.946783 | -1.775792 |
| 10            | 6             | 0           | -0.868922               | 0.380311  | -2.434096 |
| 11            | 7             | 0           | -2.036565               | 0.742358  | -1.596685 |
| 12            | 6             | 0           | -2.584228               | -0.310184 | -0.920758 |
| 13            | 6             | 0           | 0.193475                | -1.936066 | -2.807175 |
| 14            | 8             | 0           | -3.553678               | -0.291066 | -0.189191 |
| 15            | 6             | 0           | -2.509028               | 2.068714  | -1.433544 |
| 16            | 6             | 0           | -2.769431               | 2.870820  | -2.543416 |
| 17            | 6             | 0           | -3.181890               | 4.188138  | -2.368081 |
| 18            | 6             | 0           | -3.340525               | 4.682588  | -1.078375 |
| 19            | 6             | 0           | -3.096008               | 3.888713  | 0.037892  |
| 20            | 6             | 0           | -2.675967               | 2.577311  | -0.143743 |
| 21            | 6             | 0           | 0.132116                | 1.524270  | -2.554248 |

|    |    |   |           |           |           |
|----|----|---|-----------|-----------|-----------|
| 22 | 35 | 0 | -3.894263 | 6.478469  | -0.836597 |
| 23 | 35 | 0 | -6.959176 | -5.274595 | 1.093109  |
| 24 | 6  | 0 | 1.525949  | -1.490712 | -3.416428 |
| 25 | 6  | 0 | 2.427521  | -1.125416 | -2.283276 |
| 26 | 6  | 0 | 1.957695  | -0.806955 | -1.065823 |
| 27 | 6  | 0 | 3.102196  | -0.689275 | -0.110236 |
| 28 | 7  | 0 | 4.242212  | -0.872458 | -0.871517 |
| 29 | 6  | 0 | 3.928187  | -1.194848 | -2.267285 |
| 30 | 7  | 0 | 0.623206  | -0.736182 | -0.686142 |
| 31 | 6  | 0 | 0.245768  | 0.029636  | 0.463896  |
| 32 | 6  | 0 | -0.669013 | -0.489590 | 1.383190  |
| 33 | 6  | 0 | -1.142777 | 0.292846  | 2.433567  |
| 34 | 6  | 0 | -0.659641 | 1.585295  | 2.585425  |
| 35 | 6  | 0 | 0.325230  | 2.088701  | 1.741647  |
| 36 | 6  | 0 | 0.772167  | 1.307455  | 0.685300  |
| 37 | 6  | 0 | 4.470579  | -2.567451 | -2.664888 |
| 38 | 6  | 0 | 5.562161  | -0.772599 | -0.389820 |
| 39 | 6  | 0 | 5.869470  | -1.014099 | 0.956334  |
| 40 | 6  | 0 | 7.181974  | -0.912788 | 1.402254  |
| 41 | 6  | 0 | 8.193809  | -0.584874 | 0.508341  |
| 42 | 6  | 0 | 7.910036  | -0.351432 | -0.830707 |
| 43 | 6  | 0 | 6.596174  | -0.440642 | -1.274759 |
| 44 | 8  | 0 | 3.054711  | -0.482271 | 1.088329  |
| 45 | 35 | 0 | 9.983443  | -0.459269 | 1.121141  |
| 46 | 35 | 0 | -1.402716 | 2.710754  | 3.914384  |
| 47 | 1  | 0 | 4.343351  | -0.422761 | -2.929183 |
| 48 | 1  | 0 | -0.565275 | -2.085040 | -3.580504 |
| 49 | 1  | 0 | 0.328267  | -2.893365 | -2.295386 |
| 50 | 1  | 0 | 1.387883  | -0.654148 | -4.115528 |
| 51 | 1  | 0 | 1.948367  | -2.313089 | -4.003808 |
| 52 | 1  | 0 | -1.225740 | 0.113556  | -3.438984 |
| 53 | 1  | 0 | -2.653410 | 2.466611  | -3.544666 |
| 54 | 1  | 0 | -3.382283 | 4.821468  | -3.224717 |
| 55 | 1  | 0 | -3.213963 | 4.289520  | 1.038651  |
| 56 | 1  | 0 | -2.470419 | 1.946480  | 0.714553  |
| 57 | 1  | 0 | 5.083082  | -1.274415 | 1.650234  |
| 58 | 1  | 0 | 7.415223  | -1.099170 | 2.444688  |
| 59 | 1  | 0 | 8.703856  | -0.094805 | -1.523124 |
| 60 | 1  | 0 | 6.384290  | -0.241082 | -2.319347 |
| 61 | 1  | 0 | -1.026800 | -1.507326 | 1.276608  |
| 62 | 1  | 0 | -1.886654 | -0.100434 | 3.117105  |
| 63 | 1  | 0 | 0.715667  | 3.088867  | 1.891103  |
| 64 | 1  | 0 | 1.537098  | 1.696585  | 0.021008  |
| 65 | 1  | 0 | -2.057006 | -4.281967 | 1.107875  |
| 66 | 1  | 0 | -4.143170 | -5.325389 | 1.986250  |
| 67 | 1  | 0 | -6.382559 | -3.477571 | -1.178278 |
| 68 | 1  | 0 | -4.311592 | -2.392885 | -2.013808 |
| 69 | 1  | 0 | 5.557707  | -2.606667 | -2.558560 |
| 70 | 1  | 0 | 4.025366  | -3.337433 | -2.028332 |
| 71 | 1  | 0 | 4.223605  | -2.781946 | -3.707943 |
| 72 | 1  | 0 | -0.179613 | 2.230301  | -3.326773 |
| 73 | 1  | 0 | 0.211475  | 2.072219  | -1.615224 |
| 74 | 1  | 0 | 1.120939  | 1.144847  | -2.818594 |

RCh<sub>homo</sub>

| Center Number | Atomic Number | Atomic Type | Coordinates (Angstroms) |           |           |
|---------------|---------------|-------------|-------------------------|-----------|-----------|
|               |               |             | X                       | Y         | Z         |
| 1             | 6             | 0           | -4.632086               | 0.757789  | -0.499303 |
| 2             | 6             | 0           | -3.597432               | 0.329576  | -1.339667 |
| 3             | 6             | 0           | -3.720608               | -0.891115 | -2.013103 |
| 4             | 6             | 0           | -4.847114               | -1.683595 | -1.816690 |
| 5             | 6             | 0           | -5.855206               | -1.250970 | -0.965543 |
| 6             | 6             | 0           | -5.759827               | -0.029223 | -0.309908 |
| 7             | 7             | 0           | -2.437656               | 1.130339  | -1.472431 |
| 8             | 6             | 0           | -1.189550               | 0.627309  | -1.736168 |
| 9             | 6             | 0           | -0.227696               | 1.799736  | -1.652918 |
| 10            | 6             | 0           | -1.049398               | 3.007009  | -1.457380 |
| 11            | 6             | 0           | -2.502557               | 2.600814  | -1.353517 |
| 12            | 6             | 0           | -0.532708               | 4.233209  | -1.363419 |
| 13            | 7             | 0           | 1.043809                | 1.841373  | -1.731102 |
| 14            | 6             | 0           | 1.933483                | 0.764503  | -1.894265 |
| 15            | 6             | 0           | 1.843446                | -0.473140 | -1.243375 |

|    |    |   |           |           |           |
|----|----|---|-----------|-----------|-----------|
| 16 | 6  | 0 | 2.847599  | -1.421238 | -1.391967 |
| 17 | 6  | 0 | 3.939545  | -1.140215 | -2.205157 |
| 18 | 6  | 0 | 4.052980  | 0.078642  | -2.865031 |
| 19 | 6  | 0 | 3.060769  | 1.033299  | -2.684225 |
| 20 | 8  | 0 | -0.909524 | -0.534223 | -1.975238 |
| 21 | 6  | 0 | -3.438751 | 3.178515  | -2.438991 |
| 22 | 35 | 0 | 5.340557  | -2.404016 | -2.340688 |
| 23 | 35 | 0 | -7.377865 | -2.338958 | -0.690468 |
| 24 | 6  | 0 | 0.532360  | 4.230597  | 1.367914  |
| 25 | 6  | 0 | 1.049261  | 3.004380  | 1.460488  |
| 26 | 6  | 0 | 0.227744  | 1.796717  | 1.654422  |
| 27 | 6  | 0 | 1.189779  | 0.624406  | 1.736809  |
| 28 | 7  | 0 | 2.437871  | 1.127965  | 1.474006  |
| 29 | 6  | 0 | 2.502524  | 2.598571  | 1.356594  |
| 30 | 7  | 0 | -1.043791 | 1.837986  | 1.732082  |
| 31 | 6  | 0 | -1.933441 | 0.760956  | 1.894344  |
| 32 | 6  | 0 | -1.843508 | -0.476265 | 1.242626  |
| 33 | 6  | 0 | -2.847863 | -1.424284 | 1.390535  |
| 34 | 6  | 0 | -3.939807 | -1.143690 | 2.203860  |
| 35 | 6  | 0 | -4.053052 | 0.074686  | 2.864649  |
| 36 | 6  | 0 | -3.060700 | 1.029306  | 2.684510  |
| 37 | 35 | 0 | -5.341103 | -2.407289 | 2.338293  |
| 38 | 6  | 0 | 3.438382  | 3.175335  | 2.442850  |
| 39 | 6  | 0 | 3.597781  | 0.327554  | 1.340378  |
| 40 | 6  | 0 | 4.632411  | 0.756886  | 0.500551  |
| 41 | 6  | 0 | 5.760214  | -0.029804 | 0.310220  |
| 42 | 6  | 0 | 5.855683  | -1.252340 | 0.964371  |
| 43 | 6  | 0 | 4.847627  | -1.686084 | 1.814987  |
| 44 | 6  | 0 | 3.721052  | -0.893928 | 2.012346  |
| 45 | 8  | 0 | 0.909831  | -0.537445 | 1.974403  |
| 46 | 35 | 0 | 7.378371  | -2.339911 | 0.687837  |
| 47 | 1  | 0 | -2.879246 | 2.867915  | -0.357574 |
| 48 | 1  | 0 | 1.134781  | 5.110866  | 1.174280  |
| 49 | 1  | 0 | -0.540061 | 4.359548  | 1.478889  |
| 50 | 1  | 0 | 0.539663  | 4.362497  | -1.474487 |
| 51 | 1  | 0 | -1.135254 | 5.113120  | -1.168546 |
| 52 | 1  | 0 | 2.879409  | 2.866744  | 0.361014  |
| 53 | 1  | 0 | 4.552099  | 1.694084  | -0.039130 |
| 54 | 1  | 0 | 6.548701  | 0.295540  | -0.359652 |
| 55 | 1  | 0 | 4.939102  | -2.637099 | 2.327645  |
| 56 | 1  | 0 | 2.933897  | -1.233080 | 2.670328  |
| 57 | 1  | 0 | -2.933445 | -1.229405 | -2.671515 |
| 58 | 1  | 0 | -4.938524 | -2.633988 | -2.330511 |
| 59 | 1  | 0 | -6.548342 | 0.295257  | 0.360352  |
| 60 | 1  | 0 | -4.551851 | 1.694359  | 0.041480  |
| 61 | 1  | 0 | 1.005074  | -0.692617 | -0.595463 |
| 62 | 1  | 0 | 2.791201  | -2.364370 | -0.859624 |
| 63 | 1  | 0 | 4.918281  | 0.287578  | -3.484288 |
| 64 | 1  | 0 | 3.140932  | 2.006279  | -3.158567 |
| 65 | 1  | 0 | -3.140725 | 2.001971  | 3.159523  |
| 66 | 1  | 0 | -4.918331 | 0.283322  | 3.484039  |
| 67 | 1  | 0 | -2.791593 | -2.367049 | 0.857529  |
| 68 | 1  | 0 | -1.005308 | -0.695704 | 0.594454  |
| 69 | 1  | 0 | -4.420965 | 2.724291  | -2.258402 |
| 70 | 6  | 0 | -3.602021 | 4.692893  | -2.311100 |
| 71 | 6  | 0 | -2.984834 | 2.788605  | -3.844897 |
| 72 | 1  | 0 | 4.420702  | 2.721441  | 2.262006  |
| 73 | 6  | 0 | 3.601456  | 4.689867  | 2.316526  |
| 74 | 6  | 0 | 2.984228  | 2.783933  | 3.848264  |
| 75 | 1  | 0 | -3.668782 | 3.206505  | -4.589239 |
| 76 | 1  | 0 | -1.982505 | 3.180327  | -4.052643 |
| 77 | 1  | 0 | -2.967312 | 1.702410  | -3.979188 |
| 78 | 1  | 0 | -4.448186 | 5.025782  | -2.918770 |
| 79 | 1  | 0 | -3.789869 | 4.998023  | -1.275570 |
| 80 | 1  | 0 | -2.713192 | 5.218577  | -2.672404 |
| 81 | 1  | 0 | 3.667928  | 3.201221  | 4.593177  |
| 82 | 1  | 0 | 1.981777  | 3.175254  | 4.056173  |
| 83 | 1  | 0 | 2.966885  | 1.697602  | 3.981463  |
| 84 | 1  | 0 | 4.447522  | 5.022247  | 2.924611  |
| 85 | 1  | 0 | 3.789350  | 4.996094  | 1.281327  |
| 86 | 1  | 0 | 2.712527  | 5.215061  | 2.678298  |

RCh<sub>hetero</sub>



| Center<br>Number | Atomic<br>Number | Atomic<br>Type | Coordinates (Angstroms) |           |           |
|------------------|------------------|----------------|-------------------------|-----------|-----------|
|                  |                  |                | X                       | Y         | Z         |
| 1                | 6                | 0              | -5.272795               | 1.191179  | -2.309197 |
| 2                | 6                | 0              | -4.172193               | 0.587274  | -1.696939 |
| 3                | 6                | 0              | -4.275151               | -0.732831 | -1.242565 |
| 4                | 6                | 0              | -5.467168               | -1.432245 | -1.389326 |
| 5                | 6                | 0              | -6.556572               | -0.811172 | -1.988929 |
| 6                | 6                | 0              | -6.468013               | 0.495571  | -2.452139 |
| 7                | 7                | 0              | -2.962403               | 1.307991  | -1.523001 |
| 8                | 6                | 0              | -1.733385               | 0.715753  | -1.710615 |
| 9                | 6                | 0              | -0.704324               | 1.831509  | -1.641070 |
| 10               | 6                | 0              | -1.468283               | 3.092089  | -1.599859 |
| 11               | 6                | 0              | -2.910717               | 2.765551  | -1.266084 |
| 12               | 6                | 0              | -0.946959               | 4.280018  | -1.905269 |
| 13               | 7                | 0              | 0.563375                | 1.780541  | -1.741052 |
| 14               | 6                | 0              | 1.322642                | 0.595285  | -1.793255 |
| 15               | 6                | 0              | 1.132014                | -0.492626 | -0.932814 |
| 16               | 6                | 0              | 2.004864                | -1.571725 | -0.963035 |
| 17               | 6                | 0              | 3.048075                | -1.581364 | -1.885554 |
| 18               | 6                | 0              | 3.250256                | -0.516984 | -2.755615 |
| 19               | 6                | 0              | 2.404363                | 0.583491  | -2.681595 |
| 20               | 8                | 0              | -1.531492               | -0.456418 | -1.957218 |
| 21               | 6                | 0              | -3.275319               | 3.134735  | 0.192953  |
| 22               | 35               | 0              | 4.234231                | -3.056479 | -1.939377 |
| 23               | 35               | 0              | -8.184019               | -1.760140 | -2.180519 |
| 24               | 6                | 0              | 0.501269                | 4.127051  | 0.989825  |
| 25               | 6                | 0              | 1.216191                | 3.016792  | 1.171922  |
| 26               | 6                | 0              | 0.649564                | 1.769806  | 1.707353  |
| 27               | 6                | 0              | 1.768100                | 0.745668  | 1.744534  |
| 28               | 7                | 0              | 2.850036                | 1.337902  | 1.140689  |
| 29               | 6                | 0              | 2.670536                | 2.772945  | 0.835804  |
| 30               | 7                | 0              | -0.592356               | 1.596347  | 1.921761  |
| 31               | 6                | 0              | -1.164052               | 0.423188  | 2.446276  |
| 32               | 6                | 0              | -0.776116               | -0.130912 | 3.671114  |
| 33               | 6                | 0              | -1.458561               | -1.221854 | 4.191813  |
| 34               | 6                | 0              | -2.527065               | -1.764175 | 3.483018  |
| 35               | 6                | 0              | -2.936130               | -1.222098 | 2.270834  |
| 36               | 6                | 0              | -2.262669               | -0.114943 | 1.767653  |
| 37               | 35               | 0              | -3.450321               | -3.259114 | 4.193702  |
| 38               | 6                | 0              | 3.688715                | 3.618279  | 1.633072  |
| 39               | 6                | 0              | 4.006512                | 0.636293  | 0.728573  |
| 40               | 6                | 0              | 4.810703                | 1.162258  | -0.289689 |
| 41               | 6                | 0              | 5.899427                | 0.446416  | -0.774078 |
| 42               | 6                | 0              | 6.192744                | -0.796697 | -0.233815 |
| 43               | 6                | 0              | 5.435558                | -1.315380 | 0.809204  |
| 44               | 6                | 0              | 4.350845                | -0.600251 | 1.297528  |
| 45               | 8                | 0              | 1.680015                | -0.397043 | 2.152949  |
| 46               | 35               | 0              | 7.612235                | -1.818547 | -0.951354 |
| 47               | 1                | 0              | -3.589506               | 3.283373  | -1.952994 |
| 48               | 1                | 0              | 0.910721                | 5.024953  | 0.540347  |
| 49               | 1                | 0              | -0.543358               | 4.138784  | 1.288121  |
| 50               | 1                | 0              | 0.109624                | 4.349964  | -2.147667 |
| 51               | 1                | 0              | -1.544137               | 5.184952  | -1.947338 |
| 52               | 1                | 0              | 2.809267                | 2.929868  | -0.241241 |
| 53               | 1                | 0              | 4.582813                | 2.119001  | -0.743831 |
| 54               | 1                | 0              | 6.501000                | 0.849585  | -1.581134 |
| 55               | 1                | 0              | 5.680845                | -2.283795 | 1.230684  |
| 56               | 1                | 0              | 3.755918                | -1.012324 | 2.098309  |
| 57               | 1                | 0              | -3.420827               | -1.215951 | -0.785074 |
| 58               | 1                | 0              | -5.546647               | -2.453890 | -1.034921 |
| 59               | 1                | 0              | -7.321554               | 0.967249  | -2.925590 |
| 60               | 1                | 0              | -5.211247               | 2.207719  | -2.680850 |
| 61               | 1                | 0              | 0.313180                | -0.487779 | -0.220289 |
| 62               | 1                | 0              | 1.876920                | -2.397135 | -0.271651 |
| 63               | 1                | 0              | 4.077957                | -0.534528 | -3.456156 |
| 64               | 1                | 0              | 2.563761                | 1.444666  | -3.322983 |
| 65               | 1                | 0              | -2.584679               | 0.345840  | 0.838375  |
| 66               | 1                | 0              | -3.780908               | -1.644250 | 1.736472  |
| 67               | 1                | 0              | -1.160224               | -1.653738 | 5.140497  |
| 68               | 1                | 0              | 0.061397                | 0.297344  | 4.210911  |
| 69               | 1                | 0              | 4.680265                | 3.242546  | 1.351119  |
| 70               | 6                | 0              | 3.623438                | 5.095625  | 1.247790  |
| 71               | 6                | 0              | 3.522404                | 3.432481  | 3.140643  |

|    |   |   |           |          |           |
|----|---|---|-----------|----------|-----------|
| 72 | 6 | 0 | -4.615427 | 2.554010 | 0.653109  |
| 73 | 1 | 0 | -2.477795 | 2.725931 | 0.829332  |
| 74 | 6 | 0 | -3.306681 | 4.655986 | 0.358535  |
| 75 | 1 | 0 | 4.491413  | 5.623988 | 1.652128  |
| 76 | 1 | 0 | 3.619758  | 5.233935 | 0.160759  |
| 77 | 1 | 0 | 2.728862  | 5.571483 | 1.660939  |
| 78 | 1 | 0 | 4.270878  | 4.023338 | 3.676397  |
| 79 | 1 | 0 | 2.532201  | 3.769966 | 3.467408  |
| 80 | 1 | 0 | 3.648336  | 2.386220 | 3.436089  |
| 81 | 1 | 0 | -4.819095 | 2.890227 | 1.674341  |
| 82 | 1 | 0 | -5.437386 | 2.900039 | 0.015224  |
| 83 | 1 | 0 | -4.628167 | 1.461407 | 0.657588  |
| 84 | 1 | 0 | -3.581608 | 4.911307 | 1.385965  |
| 85 | 1 | 0 | -2.340590 | 5.120364 | 0.147676  |
| 86 | 1 | 0 | -4.054442 | 5.103408 | -0.308100 |

-----

**RCh<sub>homo</sub>-in/in**

-----

| Center<br>Number | Atomic<br>Number | Atomic<br>Type | Coordinates (Angstroms) |           |           |
|------------------|------------------|----------------|-------------------------|-----------|-----------|
|                  |                  |                | X                       | Y         | Z         |
| 1                | 6                | 0              | -6.216467               | -1.988794 | 0.540499  |
| 2                | 6                | 0              | -5.006863               | -1.291306 | 0.621498  |
| 3                | 6                | 0              | -5.015089               | 0.057550  | 0.995795  |
| 4                | 6                | 0              | -6.216230               | 0.693373  | 1.287235  |
| 5                | 6                | 0              | -7.408565               | -0.014522 | 1.198779  |
| 6                | 6                | 0              | -7.418515               | -1.353089 | 0.826090  |
| 7                | 7                | 0              | -3.796433               | -1.951915 | 0.299930  |
| 8                | 6                | 0              | -2.587422               | -1.636658 | 0.865806  |
| 9                | 6                | 0              | -1.573047               | -2.593054 | 0.271230  |
| 10               | 6                | 0              | -2.299087               | -3.456229 | -0.679364 |
| 11               | 6                | 0              | -3.743430               | -3.001467 | -0.741875 |
| 12               | 6                | 0              | -1.745131               | -4.507290 | -1.283575 |
| 13               | 7                | 0              | -0.354100               | -2.760573 | 0.582691  |
| 14               | 6                | 0              | 0.400179                | -1.952842 | 1.452562  |
| 15               | 6                | 0              | 0.572778                | -0.581914 | 1.243924  |
| 16               | 6                | 0              | 1.516585                | 0.128778  | 1.975996  |
| 17               | 6                | 0              | 2.279045                | -0.537366 | 2.928003  |
| 18               | 6                | 0              | 2.098120                | -1.893846 | 3.181036  |
| 19               | 6                | 0              | 1.169683                | -2.600268 | 2.427595  |
| 20               | 8                | 0              | -2.372354               | -0.785563 | 1.709026  |
| 21               | 6                | 0              | -4.224549               | -2.449282 | -2.103276 |
| 22               | 35               | 0              | 3.646370                | 0.413586  | 3.837048  |
| 23               | 35               | 0              | -9.043678               | 0.858559  | 1.586618  |
| 24               | 6                | 0              | 0.858462                | -2.754582 | -2.961591 |
| 25               | 6                | 0              | 1.604821                | -1.758024 | -2.489443 |
| 26               | 6                | 0              | 1.058784                | -0.462265 | -2.047672 |
| 27               | 6                | 0              | 2.205235                | 0.305552  | -1.411538 |
| 28               | 7                | 0              | 3.317978                | -0.471783 | -1.573660 |
| 29               | 6                | 0              | 3.115407                | -1.737491 | -2.308417 |
| 30               | 7                | 0              | -0.156623               | -0.109506 | -2.168030 |
| 31               | 6                | 0              | -0.594587               | 1.201643  | -1.888059 |
| 32               | 6                | 0              | -0.102371               | 2.292403  | -2.613983 |
| 33               | 6                | 0              | -0.624047               | 3.562902  | -2.415141 |
| 34               | 6                | 0              | -1.638425               | 3.744572  | -1.479909 |
| 35               | 6                | 0              | -2.143275               | 2.675195  | -0.751824 |
| 36               | 6                | 0              | -1.632341               | 1.400801  | -0.973790 |
| 37               | 35               | 0              | -2.353174               | 5.478835  | -1.204932 |
| 38               | 6                | 0              | 3.659018                | -2.993680 | -1.597811 |
| 39               | 6                | 0              | 4.586167                | -0.032219 | -1.106705 |
| 40               | 6                | 0              | 5.649564                | 0.125366  | -1.993478 |
| 41               | 6                | 0              | 6.896055                | 0.519008  | -1.517798 |
| 42               | 6                | 0              | 7.055293                | 0.768993  | -0.158491 |
| 43               | 6                | 0              | 5.995895                | 0.637673  | 0.732847  |
| 44               | 6                | 0              | 4.757098                | 0.233545  | 0.251029  |
| 45               | 8                | 0              | 2.145153                | 1.376845  | -0.839817 |
| 46               | 35               | 0              | 8.753052                | 1.301935  | 0.492891  |
| 47               | 1                | 0              | -4.391373               | -3.836749 | -0.449682 |
| 48               | 1                | 0              | 1.283707                | -3.699750 | -3.285230 |
| 49               | 1                | 0              | -0.219528               | -2.633001 | -3.028933 |
| 50               | 1                | 0              | -0.693932               | -4.722628 | -1.110886 |
| 51               | 1                | 0              | -2.305163               | -5.174307 | -1.929465 |
| 52               | 1                | 0              | 3.603154                | -1.657505 | -3.290604 |
| 53               | 1                | 0              | 5.508321                | -0.067006 | -3.052694 |

|    |   |   |           |           |           |
|----|---|---|-----------|-----------|-----------|
| 54 | 1 | 0 | 7.733414  | 0.636593  | -2.196046 |
| 55 | 1 | 0 | 6.128167  | 0.835732  | 1.790872  |
| 56 | 1 | 0 | 3.921248  | 0.111038  | 0.931003  |
| 57 | 1 | 0 | -4.085524 | 0.604923  | 1.075632  |
| 58 | 1 | 0 | -6.221776 | 1.738298  | 1.576182  |
| 59 | 1 | 0 | -8.353736 | -1.897538 | 0.762452  |
| 60 | 1 | 0 | -6.230072 | -3.035726 | 0.257943  |
| 61 | 1 | 0 | -0.011613 | -0.069087 | 0.489190  |
| 62 | 1 | 0 | 1.676229  | 1.182475  | 1.774887  |
| 63 | 1 | 0 | 2.702829  | -2.397040 | 3.927185  |
| 64 | 1 | 0 | 1.053176  | -3.670497 | 2.565710  |
| 65 | 1 | 0 | -2.023560 | 0.557707  | -0.414223 |
| 66 | 1 | 0 | -2.933968 | 2.832942  | -0.026667 |
| 67 | 1 | 0 | -0.243929 | 4.407477  | -2.978849 |
| 68 | 1 | 0 | 0.688793  | 2.135871  | -3.340415 |
| 69 | 1 | 0 | -5.289230 | -2.216820 | -1.973631 |
| 70 | 6 | 0 | -3.497841 | -1.162165 | -2.485235 |
| 71 | 6 | 0 | -4.113214 | -3.499975 | -3.207526 |
| 72 | 6 | 0 | 5.187709  | -3.098408 | -1.589855 |
| 73 | 6 | 0 | 3.085498  | -3.145120 | -0.192817 |
| 74 | 1 | 0 | 3.287864  | -3.824142 | -2.214276 |
| 75 | 1 | 0 | -4.657730 | -3.161689 | -4.093348 |
| 76 | 1 | 0 | -3.069643 | -3.654600 | -3.499367 |
| 77 | 1 | 0 | -4.534385 | -4.464241 | -2.901316 |
| 78 | 1 | 0 | -3.786075 | -0.853461 | -3.494722 |
| 79 | 1 | 0 | -3.750898 | -0.341427 | -1.806821 |
| 80 | 1 | 0 | -2.407980 | -1.291914 | -2.474107 |
| 81 | 1 | 0 | 3.496088  | -4.037309 | 0.290831  |
| 82 | 1 | 0 | 3.343564  | -2.281387 | 0.432644  |
| 83 | 1 | 0 | 1.996648  | -3.238655 | -0.215115 |
| 84 | 1 | 0 | 5.476815  | -4.123670 | -1.339319 |
| 85 | 1 | 0 | 5.619456  | -2.854398 | -2.566665 |
| 86 | 1 | 0 | 5.637094  | -2.437347 | -0.843730 |

TShomo

| Center Number | Atomic Number | Atomic Type | Coordinates (Angstroms) |           |           |
|---------------|---------------|-------------|-------------------------|-----------|-----------|
|               |               |             | X                       | Y         | Z         |
| 1             | 6             | 0           | -4.802182               | 0.771217  | -0.525409 |
| 2             | 6             | 0           | -3.727116               | 0.308161  | -1.295047 |
| 3             | 6             | 0           | -3.839290               | -0.932127 | -1.939468 |
| 4             | 6             | 0           | -4.979979               | -1.708712 | -1.768718 |
| 5             | 6             | 0           | -6.020642               | -1.244119 | -0.975871 |
| 6             | 6             | 0           | -5.945133               | -0.000742 | -0.363318 |
| 7             | 7             | 0           | -2.546838               | 1.081372  | -1.383055 |
| 8             | 6             | 0           | -1.301180               | 0.560942  | -1.651042 |
| 9             | 6             | 0           | -0.319995               | 1.694569  | -1.462938 |
| 10            | 6             | 0           | -1.074430               | 2.859592  | -1.131697 |
| 11            | 6             | 0           | -2.541622               | 2.530423  | -1.099949 |
| 12            | 6             | 0           | -0.417016               | 4.060138  | -0.877296 |
| 13            | 7             | 0           | 0.972044                | 1.740632  | -1.515527 |
| 14            | 6             | 0           | 1.872238                | 0.695651  | -1.740055 |
| 15            | 6             | 0           | 1.766550                | -0.613260 | -1.240740 |
| 16            | 6             | 0           | 2.806801                | -1.517674 | -1.408403 |
| 17            | 6             | 0           | 3.946358                | -1.132870 | -2.108444 |
| 18            | 6             | 0           | 4.068494                | 0.147096  | -2.638006 |
| 19            | 6             | 0           | 3.045633                | 1.060145  | -2.422926 |
| 20            | 8             | 0           | -1.041457               | -0.585915 | -1.970874 |
| 21            | 6             | 0           | -3.411724               | 3.281642  | -2.136952 |
| 22            | 35            | 0           | 5.389235                | -2.344643 | -2.273932 |
| 23            | 35            | 0           | -7.549202               | -2.325303 | -0.704628 |
| 24            | 6             | 0           | 0.417016                | 4.060138  | 0.877293  |
| 25            | 6             | 0           | 1.074430                | 2.859593  | 1.131696  |
| 26            | 6             | 0           | 0.319995                | 1.694570  | 1.462937  |
| 27            | 6             | 0           | 1.301180                | 0.560943  | 1.651041  |
| 28            | 7             | 0           | 2.546838                | 1.081373  | 1.383054  |
| 29            | 6             | 0           | 2.541622                | 2.530424  | 1.099948  |
| 30            | 7             | 0           | -0.972043               | 1.740633  | 1.515526  |
| 31            | 6             | 0           | -1.872238               | 0.695652  | 1.740054  |
| 32            | 6             | 0           | -1.766550               | -0.613260 | 1.240740  |
| 33            | 6             | 0           | -2.806801               | -1.517673 | 1.408404  |
| 34            | 6             | 0           | -3.946358               | -1.132868 | 2.108444  |
| 35            | 6             | 0           | -4.068494               | 0.147098  | 2.638005  |

|    |    |   |           |           |           |
|----|----|---|-----------|-----------|-----------|
| 36 | 6  | 0 | -3.045634 | 1.060146  | 2.422924  |
| 37 | 35 | 0 | -5.389236 | -2.344641 | 2.273934  |
| 38 | 6  | 0 | 3.411724  | 3.281643  | 2.136952  |
| 39 | 6  | 0 | 3.727116  | 0.308162  | 1.295046  |
| 40 | 6  | 0 | 4.802182  | 0.771218  | 0.525408  |
| 41 | 6  | 0 | 5.945133  | -0.000742 | 0.363317  |
| 42 | 6  | 0 | 6.020643  | -1.244118 | 0.975872  |
| 43 | 6  | 0 | 4.979980  | -1.708710 | 1.768719  |
| 44 | 6  | 0 | 3.839290  | -0.932125 | 1.939468  |
| 45 | 8  | 0 | 1.041458  | -0.585914 | 1.970873  |
| 46 | 35 | 0 | 7.549202  | -2.325301 | 0.704629  |
| 47 | 1  | 0 | -2.935895 | 2.707086  | -0.088899 |
| 48 | 1  | 0 | 0.995896  | 4.969066  | 0.752997  |
| 49 | 1  | 0 | -0.531074 | 4.170298  | 1.398157  |
| 50 | 1  | 0 | 0.531074  | 4.170297  | -1.398159 |
| 51 | 1  | 0 | -0.995896 | 4.969066  | -0.753001 |
| 52 | 1  | 0 | 2.935895  | 2.707087  | 0.088899  |
| 53 | 1  | 0 | 4.747164  | 1.724815  | 0.013800  |
| 54 | 1  | 0 | 6.760617  | 0.354753  | -0.257048 |
| 55 | 1  | 0 | 5.054228  | -2.675474 | 2.254077  |
| 56 | 1  | 0 | 3.029287  | -1.299586 | 2.551438  |
| 57 | 1  | 0 | -3.029286 | -1.299588 | -2.551437 |
| 58 | 1  | 0 | -5.054227 | -2.675476 | -2.254075 |
| 59 | 1  | 0 | -6.760617 | 0.354753  | 0.257046  |
| 60 | 1  | 0 | -4.747164 | 1.724814  | -0.013802 |
| 61 | 1  | 0 | 0.883969  | -0.917297 | -0.694463 |
| 62 | 1  | 0 | 2.738648  | -2.513824 | -0.985321 |
| 63 | 1  | 0 | 4.967088  | 0.434308  | -3.173079 |
| 64 | 1  | 0 | 3.131419  | 2.078916  | -2.788482 |
| 65 | 1  | 0 | -3.131419 | 2.078918  | 2.788480  |
| 66 | 1  | 0 | -4.967088 | 0.434310  | 3.173078  |
| 67 | 1  | 0 | -2.738649 | -2.513823 | 0.985323  |
| 68 | 1  | 0 | -0.883969 | -0.917298 | 0.694464  |
| 69 | 1  | 0 | -4.412590 | 2.839344  | -2.062884 |
| 70 | 6  | 0 | -3.539817 | 4.768310  | -1.804670 |
| 71 | 6  | 0 | -2.908487 | 3.073439  | -3.564265 |
| 72 | 1  | 0 | 4.412591  | 2.839347  | 2.062881  |
| 73 | 6  | 0 | 3.539813  | 4.768311  | 1.804671  |
| 74 | 6  | 0 | 2.908489  | 3.073437  | 3.564265  |
| 75 | 1  | 0 | -3.568543 | 3.582805  | -4.272394 |
| 76 | 1  | 0 | -1.900569 | 3.485651  | -3.687440 |
| 77 | 1  | 0 | -2.882535 | 2.012723  | -3.832570 |
| 78 | 1  | 0 | -4.362536 | 5.207024  | -2.376313 |
| 79 | 1  | 0 | -3.742788 | 4.933527  | -0.740572 |
| 80 | 1  | 0 | -2.631477 | 5.316197  | -2.073323 |
| 81 | 1  | 0 | 3.568544  | 3.582803  | 4.272394  |
| 82 | 1  | 0 | 1.900570  | 3.485645  | 3.687441  |
| 83 | 1  | 0 | 2.882540  | 2.012720  | 3.832568  |
| 84 | 1  | 0 | 4.362532  | 5.207026  | 2.376314  |
| 85 | 1  | 0 | 3.742783  | 4.933531  | 0.740574  |
| 86 | 1  | 0 | 2.631473  | 5.316196  | 2.073327  |

-----  
**TShetero**  
 -----

| Center<br>Number | Atomic<br>Number | Atomic<br>Type | Coordinates (Angstroms) |           |           |
|------------------|------------------|----------------|-------------------------|-----------|-----------|
|                  |                  |                | X                       | Y         | Z         |
| 1                | 6                | 0              | -5.169941               | 0.221721  | -2.648470 |
| 2                | 6                | 0              | -4.195217               | -0.135204 | -1.714963 |
| 3                | 6                | 0              | -4.417998               | -1.222539 | -0.863948 |
| 4                | 6                | 0              | -5.608134               | -1.936193 | -0.938782 |
| 5                | 6                | 0              | -6.575681               | -1.556238 | -1.861963 |
| 6                | 6                | 0              | -6.366633               | -0.482942 | -2.719149 |
| 7                | 7                | 0              | -2.981617               | 0.593521  | -1.619850 |
| 8                | 6                | 0              | -1.765638               | -0.063780 | -1.588751 |
| 9                | 6                | 0              | -0.715727               | 0.997190  | -1.813928 |
| 10               | 6                | 0              | -1.394994               | 2.228335  | -2.021405 |
| 11               | 6                | 0              | -2.882798               | 2.054160  | -1.818851 |
| 12               | 6                | 0              | -0.655534               | 3.363744  | -2.343413 |
| 13               | 7                | 0              | 0.577074                | 0.928168  | -1.909681 |
| 14               | 6                | 0              | 1.347647                | -0.211142 | -1.650778 |
| 15               | 6                | 0              | 1.132330                | -1.101924 | -0.586092 |
| 16               | 6                | 0              | 2.042263                | -2.116847 | -0.328487 |
| 17               | 6                | 0              | 3.154424                | -2.267968 | -1.154826 |

|    |    |   |           |           |           |
|----|----|---|-----------|-----------|-----------|
| 18 | 6  | 0 | 3.378510  | -1.415205 | -2.228136 |
| 19 | 6  | 0 | 2.486691  | -0.374372 | -2.452723 |
| 20 | 8  | 0 | -1.610309 | -1.263395 | -1.478086 |
| 21 | 6  | 0 | -3.476911 | 2.897157  | -0.657202 |
| 22 | 35 | 0 | 4.423352  | -3.621215 | -0.778653 |
| 23 | 35 | 0 | -8.205489 | -2.517860 | -1.952197 |
| 24 | 6  | 0 | 0.221669  | 4.034329  | -0.776082 |
| 25 | 6  | 0 | 1.042786  | 3.065941  | -0.198144 |
| 26 | 6  | 0 | 0.541283  | 2.158844  | 0.789893  |
| 27 | 6  | 0 | 1.697213  | 1.277910  | 1.220484  |
| 28 | 7  | 0 | 2.780792  | 1.658918  | 0.459120  |
| 29 | 6  | 0 | 2.514701  | 2.830614  | -0.399087 |
| 30 | 7  | 0 | -0.707665 | 2.081140  | 1.097109  |
| 31 | 6  | 0 | -1.218012 | 1.252089  | 2.108065  |
| 32 | 6  | 0 | -0.720890 | 1.267567  | 3.419117  |
| 33 | 6  | 0 | -1.336300 | 0.523260  | 4.415097  |
| 34 | 6  | 0 | -2.453575 | -0.247366 | 4.103928  |
| 35 | 6  | 0 | -2.973476 | -0.268788 | 2.816423  |
| 36 | 6  | 0 | -2.363789 | 0.497057  | 1.828832  |
| 37 | 35 | 0 | -3.288675 | -1.269532 | 5.465715  |
| 38 | 6  | 0 | 3.435853  | 4.010709  | 0.006229  |
| 39 | 6  | 0 | 3.978441  | 0.915918  | 0.342844  |
| 40 | 6  | 0 | 4.853328  | 1.164726  | -0.724737 |
| 41 | 6  | 0 | 5.980235  | 0.375812  | -0.921117 |
| 42 | 6  | 0 | 6.245747  | -0.666190 | -0.044441 |
| 43 | 6  | 0 | 5.425163  | -0.893586 | 1.052066  |
| 44 | 6  | 0 | 4.301062  | -0.103323 | 1.253423  |
| 45 | 8  | 0 | 1.647167  | 0.377590  | 2.036520  |
| 46 | 35 | 0 | 7.715138  | -1.813868 | -0.363554 |
| 47 | 1  | 0 | -3.408780 | 2.325972  | -2.745323 |
| 48 | 1  | 0 | 0.686348  | 4.874960  | -1.281645 |
| 49 | 1  | 0 | -0.664902 | 4.279911  | -0.196324 |
| 50 | 1  | 0 | 0.273676  | 3.150941  | -2.868209 |
| 51 | 1  | 0 | -1.173036 | 4.261205  | -2.667945 |
| 52 | 1  | 0 | 2.694626  | 2.551923  | -1.447628 |
| 53 | 1  | 0 | 4.651132  | 1.949246  | -1.444022 |
| 54 | 1  | 0 | 6.632496  | 0.561029  | -1.767340 |
| 55 | 1  | 0 | 5.646547  | -1.701802 | 1.740227  |
| 56 | 1  | 0 | 3.657894  | -0.299098 | 2.097094  |
| 57 | 1  | 0 | -3.656916 | -1.512558 | -0.149172 |
| 58 | 1  | 0 | -5.783677 | -2.777570 | -0.277998 |
| 59 | 1  | 0 | -7.125807 | -0.202690 | -3.440568 |
| 60 | 1  | 0 | -5.006179 | 1.051574  | -3.327244 |
| 61 | 1  | 0 | 0.276021  | -0.971536 | 0.065900  |
| 62 | 1  | 0 | 1.898145  | -2.780021 | 0.517242  |
| 63 | 1  | 0 | 4.257940  | -1.539352 | -2.850348 |
| 64 | 1  | 0 | 2.656761  | 0.332412  | -3.259455 |
| 65 | 1  | 0 | -2.772272 | 0.512891  | 0.823673  |
| 66 | 1  | 0 | -3.852051 | -0.862885 | 2.588312  |
| 67 | 1  | 0 | -0.950124 | 0.537484  | 5.428263  |
| 68 | 1  | 0 | 0.149970  | 1.870551  | 3.652542  |
| 69 | 1  | 0 | 4.441992  | 3.584014  | 0.095043  |
| 70 | 6  | 0 | 3.494998  | 5.092161  | -1.072054 |
| 71 | 6  | 0 | 3.058544  | 4.591996  | 1.368027  |
| 72 | 6  | 0 | -4.867409 | 2.438039  | -0.211059 |
| 73 | 1  | 0 | -2.786887 | 2.799142  | 0.187717  |
| 74 | 6  | 0 | -3.554460 | 4.371783  | -1.066427 |
| 75 | 1  | 0 | 4.306515  | 5.791823  | -0.852293 |
| 76 | 1  | 0 | 3.677519  | 4.664777  | -2.064145 |
| 77 | 1  | 0 | 2.571436  | 5.677392  | -1.114342 |
| 78 | 1  | 0 | 3.807613  | 5.323468  | 1.684459  |
| 79 | 1  | 0 | 2.088465  | 5.098849  | 1.326441  |
| 80 | 1  | 0 | 3.006579  | 3.812937  | 2.136045  |
| 81 | 1  | 0 | -5.220218 | 3.104087  | 0.582373  |
| 82 | 1  | 0 | -5.590222 | 2.483452  | -1.033648 |
| 83 | 1  | 0 | -4.870667 | 1.420500  | 0.187275  |
| 84 | 1  | 0 | -4.026807 | 4.951104  | -0.268060 |
| 85 | 1  | 0 | -2.575618 | 4.818031  | -1.252663 |
| 86 | 1  | 0 | -4.162454 | 4.493954  | -1.970933 |

-----  
**TSh<sub>homo</sub>-in/in**  
 -----

| Center<br>Number | Atomic<br>Number | Atomic<br>Type | Coordinates (Angstroms) |   |   |
|------------------|------------------|----------------|-------------------------|---|---|
|                  |                  |                | X                       | Y | Z |

S133

|    |    |   |           |           |           |
|----|----|---|-----------|-----------|-----------|
| 1  | 6  | 0 | -5.664157 | -2.012613 | 1.183350  |
| 2  | 6  | 0 | -4.630694 | -1.112424 | 0.907095  |
| 3  | 6  | 0 | -4.902905 | 0.260639  | 0.882403  |
| 4  | 6  | 0 | -6.190303 | 0.722383  | 1.127550  |
| 5  | 6  | 0 | -7.207620 | -0.187923 | 1.389391  |
| 6  | 6  | 0 | -6.955231 | -1.553546 | 1.418589  |
| 7  | 7  | 0 | -3.322958 | -1.583987 | 0.646786  |
| 8  | 6  | 0 | -2.194263 | -0.953434 | 1.132073  |
| 9  | 6  | 0 | -1.032018 | -1.855532 | 0.784389  |
| 10 | 6  | 0 | -1.553379 | -2.965085 | 0.061025  |
| 11 | 6  | 0 | -3.062294 | -2.893257 | 0.020452  |
| 12 | 6  | 0 | -0.708286 | -3.988821 | -0.390215 |
| 13 | 7  | 0 | 0.214716  | -1.785046 | 1.130422  |
| 14 | 6  | 0 | 0.826912  | -0.674188 | 1.718010  |
| 15 | 6  | 0 | 0.648101  | 0.645529  | 1.277052  |
| 16 | 6  | 0 | 1.442446  | 1.669576  | 1.779070  |
| 17 | 6  | 0 | 2.398015  | 1.379336  | 2.746564  |
| 18 | 6  | 0 | 2.560240  | 0.088537  | 3.242839  |
| 19 | 6  | 0 | 1.787611  | -0.933016 | 2.711884  |
| 20 | 8  | 0 | -2.168267 | 0.087610  | 1.757746  |
| 21 | 6  | 0 | -3.820898 | -3.084337 | -1.311624 |
| 22 | 35 | 0 | 3.589841  | 2.736479  | 3.318829  |
| 23 | 35 | 0 | -8.963710 | 0.442835  | 1.716014  |
| 24 | 6  | 0 | 0.148119  | -3.498937 | -1.978266 |
| 25 | 6  | 0 | 1.074032  | -2.474055 | -1.751264 |
| 26 | 6  | 0 | 0.713384  | -1.091492 | -1.774839 |
| 27 | 6  | 0 | 1.965077  | -0.312334 | -1.416435 |
| 28 | 7  | 0 | 2.958971  | -1.245744 | -1.221221 |
| 29 | 6  | 0 | 2.572002  | -2.616193 | -1.596570 |
| 30 | 7  | 0 | -0.493250 | -0.685103 | -2.000135 |
| 31 | 6  | 0 | -0.853286 | 0.663270  | -2.132122 |
| 32 | 6  | 0 | -0.149263 | 1.574070  | -2.935150 |
| 33 | 6  | 0 | -0.616011 | 2.868528  | -3.111272 |
| 34 | 6  | 0 | -1.791082 | 3.266634  | -2.479403 |
| 35 | 6  | 0 | -2.518611 | 2.380130  | -1.696136 |
| 36 | 6  | 0 | -2.056300 | 1.078276  | -1.544803 |
| 37 | 35 | 0 | -2.417736 | 5.041097  | -2.708165 |
| 38 | 6  | 0 | 3.061015  | -3.766883 | -0.684580 |
| 39 | 6  | 0 | 4.272983  | -0.821590 | -0.902879 |
| 40 | 6  | 0 | 5.374698  | -1.223531 | -1.654897 |
| 41 | 6  | 0 | 6.649816  | -0.782977 | -1.308846 |
| 42 | 6  | 0 | 6.802606  | 0.077750  | -0.228056 |
| 43 | 6  | 0 | 5.708146  | 0.506222  | 0.517025  |
| 44 | 6  | 0 | 4.442985  | 0.048008  | 0.177140  |
| 45 | 8  | 0 | 2.088550  | 0.890643  | -1.304362 |
| 46 | 35 | 0 | 8.537703  | 0.685101  | 0.234672  |
| 47 | 1  | 0 | -3.419837 | -3.683211 | 0.701941  |
| 48 | 1  | 0 | 0.548720  | -4.476700 | -2.240110 |
| 49 | 1  | 0 | -0.720307 | -3.203167 | -2.561001 |
| 50 | 1  | 0 | 0.186538  | -4.123469 | 0.213705  |
| 51 | 1  | 0 | -1.171640 | -4.916458 | -0.713361 |
| 52 | 1  | 0 | 2.966231  | -2.824558 | -2.606576 |
| 53 | 1  | 0 | 5.243647  | -1.879568 | -2.510045 |
| 54 | 1  | 0 | 7.514051  | -1.096511 | -1.883255 |
| 55 | 1  | 0 | 5.831490  | 1.185979  | 1.353624  |
| 56 | 1  | 0 | 3.575152  | 0.366023  | 0.742883  |
| 57 | 1  | 0 | -4.104588 | 0.967367  | 0.694075  |
| 58 | 1  | 0 | -6.400306 | 1.785828  | 1.110151  |
| 59 | 1  | 0 | -7.754649 | -2.254094 | 1.631460  |
| 60 | 1  | 0 | -5.468199 | -3.078706 | 1.227345  |
| 61 | 1  | 0 | -0.079473 | 0.863545  | 0.502203  |
| 62 | 1  | 0 | 1.340781  | 2.677829  | 1.393988  |
| 63 | 1  | 0 | 3.307137  | -0.116729 | 4.001453  |
| 64 | 1  | 0 | 1.919536  | -1.951830 | 3.060516  |
| 65 | 1  | 0 | -2.627138 | 0.361458  | -0.966527 |
| 66 | 1  | 0 | -3.442116 | 2.697012  | -1.223644 |
| 67 | 1  | 0 | -0.069194 | 3.567614  | -3.734216 |
| 68 | 1  | 0 | 0.764106  | 1.260563  | -3.426855 |
| 69 | 1  | 0 | -4.883045 | -3.102623 | -1.039177 |
| 70 | 6  | 0 | -3.616435 | -1.940004 | -2.298394 |
| 71 | 6  | 0 | -3.507849 | -4.441358 | -1.946443 |
| 72 | 6  | 0 | 4.440924  | -4.308610 | -1.074355 |
| 73 | 6  | 0 | 3.015044  | -3.427487 | 0.801435  |

|    |   |   |           |           |           |
|----|---|---|-----------|-----------|-----------|
| 74 | 1 | 0 | 2.346926  | -4.582154 | -0.871580 |
| 75 | 1 | 0 | -4.246074 | -4.659800 | -2.722849 |
| 76 | 1 | 0 | -2.524413 | -4.447262 | -2.426767 |
| 77 | 1 | 0 | -3.541383 | -5.256002 | -1.214499 |
| 78 | 1 | 0 | -4.104810 | -2.180817 | -3.247959 |
| 79 | 1 | 0 | -4.062463 | -1.012578 | -1.925802 |
| 80 | 1 | 0 | -2.553472 | -1.753790 | -2.484112 |
| 81 | 1 | 0 | 3.308783  | -4.304110 | 1.388249  |
| 82 | 1 | 0 | 3.713300  | -2.616758 | 1.037481  |
| 83 | 1 | 0 | 2.013902  | -3.114719 | 1.101167  |
| 84 | 1 | 0 | 4.606027  | -5.270170 | -0.579019 |
| 85 | 1 | 0 | 4.527996  | -4.468457 | -2.154710 |
| 86 | 1 | 0 | 5.241169  | -3.634336 | -0.758202 |

-----  
**5h<sub>homo</sub>**

| Center<br>Number | Atomic<br>Number | Atomic<br>Type | Coordinates (Angstroms) |           |           |
|------------------|------------------|----------------|-------------------------|-----------|-----------|
|                  |                  |                | X                       | Y         | Z         |
| 1                | 6                | 0              | -4.700689               | 0.616632  | -0.963983 |
| 2                | 6                | 0              | -3.534836               | 0.258300  | -1.656955 |
| 3                | 6                | 0              | -3.470008               | -1.004922 | -2.261810 |
| 4                | 6                | 0              | -4.518575               | -1.906878 | -2.115862 |
| 5                | 6                | 0              | -5.646687               | -1.546298 | -1.390202 |
| 6                | 6                | 0              | -5.752606               | -0.280473 | -0.830035 |
| 7                | 7                | 0              | -2.431379               | 1.138605  | -1.691587 |
| 8                | 6                | 0              | -1.112625               | 0.702403  | -1.675977 |
| 9                | 6                | 0              | -0.301425               | 1.857554  | -1.194560 |
| 10               | 6                | 0              | -1.111155               | 2.893508  | -0.933878 |
| 11               | 6                | 0              | -2.538362               | 2.523024  | -1.217571 |
| 12               | 6                | 0              | -0.688595               | 4.098778  | -0.162944 |
| 13               | 7                | 0              | 0.982470                | 1.757557  | -0.669341 |
| 14               | 6                | 0              | 2.034104                | 0.987620  | -1.257869 |
| 15               | 6                | 0              | 2.086216                | -0.401704 | -1.119340 |
| 16               | 6                | 0              | 3.196484                | -1.114234 | -1.556752 |
| 17               | 6                | 0              | 4.262972                | -0.425478 | -2.122196 |
| 18               | 6                | 0              | 4.214124                | 0.949329  | -2.322181 |
| 19               | 6                | 0              | 3.087881                | 1.648781  | -1.895647 |
| 20               | 8                | 0              | -0.720188               | -0.422478 | -1.931416 |
| 21               | 6                | 0              | -3.300120               | 3.411057  | -2.220294 |
| 22               | 35               | 0              | 5.844883                | -1.377293 | -2.539341 |
| 23               | 35               | 0              | -7.053662               | -2.790979 | -1.153965 |
| 24               | 6                | 0              | 0.702773                | 3.917080  | 0.489634  |
| 25               | 6                | 0              | 1.109330                | 2.455097  | 0.666078  |
| 26               | 6                | 0              | 0.229652                | 1.559631  | 1.516890  |
| 27               | 6                | 0              | 1.110375                | 0.389259  | 1.925396  |
| 28               | 7                | 0              | 2.409578                | 0.778155  | 1.673239  |
| 29               | 6                | 0              | 2.504300                | 2.194469  | 1.256780  |
| 30               | 7                | 0              | -1.015802               | 1.752956  | 1.660644  |
| 31               | 6                | 0              | -1.980129               | 0.769958  | 1.954730  |
| 32               | 6                | 0              | -1.993690               | -0.454596 | 1.272623  |
| 33               | 6                | 0              | -3.088866               | -1.302004 | 1.367735  |
| 34               | 6                | 0              | -4.170138               | -0.929217 | 2.158164  |
| 35               | 6                | 0              | -4.171414               | 0.272009  | 2.859461  |
| 36               | 6                | 0              | -3.082718               | 1.128675  | 2.738440  |
| 37               | 35               | 0              | -5.697991               | -2.046861 | 2.203011  |
| 38               | 6                | 0              | 2.981082                | 3.050495  | 2.452257  |
| 39               | 6                | 0              | 3.528290                | -0.084314 | 1.604719  |
| 40               | 6                | 0              | 4.766824                | 0.420586  | 1.180739  |
| 41               | 6                | 0              | 5.830342                | -0.432179 | 0.913012  |
| 42               | 6                | 0              | 5.671478                | -1.799548 | 1.085690  |
| 43               | 6                | 0              | 4.477429                | -2.312854 | 1.575867  |
| 44               | 6                | 0              | 3.410894                | -1.462849 | 1.844530  |
| 45               | 8                | 0              | 0.733522                | -0.663361 | 2.403520  |
| 46               | 35               | 0              | 7.089278                | -2.967235 | 0.633721  |
| 47               | 1                | 0              | -3.057589               | 2.529941  | -0.246580 |
| 48               | 1                | 0              | 1.473139                | 4.384576  | -0.133329 |
| 49               | 1                | 0              | 0.706825                | 4.430616  | 1.452339  |
| 50               | 1                | 0              | -0.665606               | 4.988740  | -0.803633 |
| 51               | 1                | 0              | -1.442244               | 4.287050  | 0.609011  |
| 52               | 1                | 0              | 3.242973                | 2.281605  | 0.459400  |
| 53               | 1                | 0              | 4.922425                | 1.480979  | 1.025881  |
| 54               | 1                | 0              | 6.769608                | -0.030660 | 0.548951  |
| 55               | 1                | 0              | 4.367783                | -3.380106 | 1.734120  |

|    |   |   |           |           |           |
|----|---|---|-----------|-----------|-----------|
| 56 | 1 | 0 | 2.479156  | -1.873594 | 2.203460  |
| 57 | 1 | 0 | -2.590438 | -1.290676 | -2.819841 |
| 58 | 1 | 0 | -4.453631 | -2.890191 | -2.568634 |
| 59 | 1 | 0 | -6.636369 | -0.003480 | -0.265863 |
| 60 | 1 | 0 | -4.796116 | 1.586989  | -0.491440 |
| 61 | 1 | 0 | 1.269046  | -0.920220 | -0.630201 |
| 62 | 1 | 0 | 3.256096  | -2.186804 | -1.409288 |
| 63 | 1 | 0 | 5.049099  | 1.467227  | -2.780464 |
| 64 | 1 | 0 | 3.034681  | 2.726558  | -2.023197 |
| 65 | 1 | 0 | -3.084409 | 2.092379  | 3.237861  |
| 66 | 1 | 0 | -5.026985 | 0.549479  | 3.465168  |
| 67 | 1 | 0 | -3.117543 | -2.228539 | 0.804174  |
| 68 | 1 | 0 | -1.162934 | -0.722049 | 0.627414  |
| 69 | 1 | 0 | -4.218845 | 2.866118  | -2.474609 |
| 70 | 6 | 0 | -3.706393 | 4.739538  | -1.583032 |
| 71 | 6 | 0 | -2.495953 | 3.620087  | -3.501613 |
| 72 | 1 | 0 | 3.855104  | 2.498270  | 2.824392  |
| 73 | 6 | 0 | 3.490370  | 4.434658  | 2.038735  |
| 74 | 6 | 0 | 1.988235  | 3.118894  | 3.615082  |
| 75 | 1 | 0 | -3.101658 | 4.135587  | -4.252457 |
| 76 | 1 | 0 | -1.606228 | 4.229918  | -3.307744 |
| 77 | 1 | 0 | -2.168549 | 2.664960  | -3.924057 |
| 78 | 1 | 0 | -4.339947 | 5.309181  | -2.269052 |
| 79 | 1 | 0 | -4.266823 | 4.584047  | -0.654685 |
| 80 | 1 | 0 | -2.832842 | 5.357843  | -1.352448 |
| 81 | 1 | 0 | 2.448976  | 3.644606  | 4.456561  |
| 82 | 1 | 0 | 1.070806  | 3.655673  | 3.354100  |
| 83 | 1 | 0 | 1.708899  | 2.120591  | 3.966788  |
| 84 | 1 | 0 | 4.073578  | 4.867647  | 2.856472  |
| 85 | 1 | 0 | 4.141951  | 4.373125  | 1.159675  |
| 86 | 1 | 0 | 2.681096  | 5.132045  | 1.811224  |

-----  
**5hetero**  
 -----

| Center<br>Number | Atomic<br>Number | Atomic<br>Type | Coordinates (Angstroms) |           |           |
|------------------|------------------|----------------|-------------------------|-----------|-----------|
|                  |                  |                | X                       | Y         | Z         |
| 1                | 6                | 0              | 6.024933                | -0.968339 | 1.076344  |
| 2                | 6                | 0              | 4.893480                | -0.991830 | 0.254775  |
| 3                | 6                | 0              | 4.958125                | -1.637667 | -0.984466 |
| 4                | 6                | 0              | 6.137524                | -2.248265 | -1.395205 |
| 5                | 6                | 0              | 7.256107                | -2.200968 | -0.571787 |
| 6                | 6                | 0              | 7.210905                | -1.562284 | 0.661464  |
| 7                | 7                | 0              | 3.695653                | -0.373402 | 0.673201  |
| 8                | 6                | 0              | 2.459854                | -0.979881 | 0.537702  |
| 9                | 6                | 0              | 1.517958                | -0.154100 | 1.352396  |
| 10               | 6                | 0              | 2.199208                | 0.823356  | 1.971668  |
| 11               | 6                | 0              | 3.616375                | 0.868556  | 1.455749  |
| 12               | 6                | 0              | 1.615148                | 1.611354  | 3.097005  |
| 13               | 7                | 0              | 0.182293                | -0.485117 | 1.562183  |
| 14               | 6                | 0              | -0.467506               | -1.314689 | 0.583078  |
| 15               | 6                | 0              | -0.622763               | -0.895288 | -0.741527 |
| 16               | 6                | 0              | -1.332319               | -1.675620 | -1.644817 |
| 17               | 6                | 0              | -1.874900               | -2.885865 | -1.214867 |
| 18               | 6                | 0              | -1.684437               | -3.343908 | 0.079787  |
| 19               | 6                | 0              | -0.969765               | -2.551495 | 0.976176  |
| 20               | 8                | 0              | 2.229930                | -2.010847 | -0.066301 |
| 21               | 6                | 0              | 3.904407                | 2.100511  | 0.555503  |
| 22               | 35               | 0              | -2.940440               | -3.904139 | -2.403388 |
| 23               | 35               | 0              | 8.869160                | -3.019958 | -1.139873 |
| 24               | 6                | 0              | 0.249662                | 1.020192  | 3.483742  |
| 25               | 6                | 0              | -0.590261               | 0.588338  | 2.275227  |
| 26               | 6                | 0              | -0.919110               | 1.696909  | 1.289179  |
| 27               | 6                | 0              | -2.220327               | 1.308595  | 0.602888  |
| 28               | 7                | 0              | -2.744479               | 0.271615  | 1.334108  |
| 29               | 6                | 0              | -2.011130               | 0.053139  | 2.602204  |
| 30               | 7                | 0              | -0.167730               | 2.683718  | 1.034733  |
| 31               | 6                | 0              | -0.524009               | 3.706315  | 0.128800  |
| 32               | 6                | 0              | -1.627200               | 4.532121  | 0.359526  |
| 33               | 6                | 0              | -1.891279               | 5.596958  | -0.491710 |
| 34               | 6                | 0              | -1.049369               | 5.826998  | -1.575092 |
| 35               | 6                | 0              | 0.059474                | 5.022614  | -1.810903 |
| 36               | 6                | 0              | 0.331721                | 3.971750  | -0.942223 |
| 37               | 35               | 0              | -1.413062               | 7.276738  | -2.742206 |



|    |    |   |           |           |           |
|----|----|---|-----------|-----------|-----------|
| 38 | 6  | 0 | -2.818239 | 0.684995  | 3.761933  |
| 39 | 6  | 0 | -3.728005 | -0.634285 | 0.873878  |
| 40 | 6  | 0 | -4.167587 | -1.672379 | 1.707341  |
| 41 | 6  | 0 | -4.987547 | -2.680281 | 1.212587  |
| 42 | 6  | 0 | -5.389274 | -2.644163 | -0.114947 |
| 43 | 6  | 0 | -5.028893 | -1.582552 | -0.934308 |
| 44 | 6  | 0 | -4.207562 | -0.576506 | -0.444882 |
| 45 | 8  | 0 | -2.640298 | 1.787576  | -0.432107 |
| 46 | 35 | 0 | -6.404705 | -4.067587 | -0.834378 |
| 47 | 1  | 0 | 4.333802  | 0.851438  | 2.287684  |
| 48 | 1  | 0 | 0.388589  | 0.131668  | 4.109112  |
| 49 | 1  | 0 | -0.298794 | 1.756860  | 4.069607  |
| 50 | 1  | 0 | 2.284167  | 1.557455  | 3.965339  |
| 51 | 1  | 0 | 1.501496  | 2.666886  | 2.848151  |
| 52 | 1  | 0 | -1.931186 | -1.022483 | 2.779325  |
| 53 | 1  | 0 | -3.851335 | -1.736746 | 2.741627  |
| 54 | 1  | 0 | -5.293042 | -3.497186 | 1.856688  |
| 55 | 1  | 0 | -5.359707 | -1.554602 | -1.966548 |
| 56 | 1  | 0 | -3.908364 | 0.229921  | -1.096852 |
| 57 | 1  | 0 | 4.083365  | -1.661350 | -1.621485 |
| 58 | 1  | 0 | 6.188025  | -2.748180 | -2.355935 |
| 59 | 1  | 0 | 8.088702  | -1.536919 | 1.297220  |
| 60 | 1  | 0 | 5.987892  | -0.484428 | 2.046319  |
| 61 | 1  | 0 | -0.206835 | 0.058889  | -1.057758 |
| 62 | 1  | 0 | -1.483037 | -1.342676 | -2.665744 |
| 63 | 1  | 0 | -2.102465 | -4.294782 | 0.390792  |
| 64 | 1  | 0 | -0.800923 | -2.892417 | 1.993074  |
| 65 | 1  | 0 | 1.201689  | 3.340416  | -1.096413 |
| 66 | 1  | 0 | 0.709457  | 5.221447  | -2.655649 |
| 67 | 1  | 0 | -2.746567 | 6.240551  | -0.318793 |
| 68 | 1  | 0 | -2.273792 | 4.338302  | 1.210308  |
| 69 | 1  | 0 | -3.825474 | 0.270778  | 3.620325  |
| 70 | 6  | 0 | -2.363844 | 0.227288  | 5.151847  |
| 71 | 6  | 0 | -2.981371 | 2.205392  | 3.666183  |
| 72 | 6  | 0 | 5.368209  | 2.162669  | 0.111105  |
| 73 | 1  | 0 | 3.271213  | 1.965656  | -0.332521 |
| 74 | 6  | 0 | 3.506911  | 3.411948  | 1.237420  |
| 75 | 1  | 0 | -3.153350 | 0.439359  | 5.878490  |
| 76 | 1  | 0 | -2.172558 | -0.851337 | 5.172408  |
| 77 | 1  | 0 | -1.461108 | 0.736448  | 5.494804  |
| 78 | 1  | 0 | -3.633854 | 2.551502  | 4.473171  |
| 79 | 1  | 0 | -2.033980 | 2.745973  | 3.757883  |
| 80 | 1  | 0 | -3.451674 | 2.497007  | 2.721287  |
| 81 | 1  | 0 | 5.536708  | 3.072102  | -0.473687 |
| 82 | 1  | 0 | 6.036721  | 2.196207  | 0.980334  |
| 83 | 1  | 0 | 5.657184  | 1.310650  | -0.507237 |
| 84 | 1  | 0 | 3.895086  | 4.260891  | 0.666585  |
| 85 | 1  | 0 | 2.420979  | 3.520086  | 1.296761  |
| 86 | 1  | 0 | 3.922543  | 3.476396  | 2.250918  |

5h<sub>homo-in/in</sub>

| Center Number | Atomic Number | Atomic Type | Coordinates (Angstroms) |           |           |
|---------------|---------------|-------------|-------------------------|-----------|-----------|
|               |               |             | X                       | Y         | Z         |
| 1             | 6             | 0           | -6.491561               | 0.805405  | 0.802705  |
| 2             | 6             | 0           | -5.516983               | -0.008501 | 0.211536  |
| 3             | 6             | 0           | -5.870900               | -0.807732 | -0.884463 |
| 4             | 6             | 0           | -7.167367               | -0.777480 | -1.383038 |
| 5             | 6             | 0           | -8.119847               | 0.037704  | -0.783243 |
| 6             | 6             | 0           | -7.791557               | 0.826565  | 0.310898  |
| 7             | 7             | 0           | -4.206828               | -0.031082 | 0.728331  |
| 8             | 6             | 0           | -3.073601               | -0.283292 | -0.023607 |
| 9             | 6             | 0           | -1.926871               | -0.076095 | 0.904581  |
| 10            | 6             | 0           | -2.372612               | 0.357906  | 2.092958  |
| 11            | 6             | 0           | -3.878569               | 0.409994  | 2.092344  |
| 12            | 6             | 0           | -1.431458               | 0.780770  | 3.172411  |
| 13            | 7             | 0           | -0.611227               | -0.137735 | 0.468274  |
| 14            | 6             | 0           | -0.241926               | -1.209234 | -0.395581 |
| 15            | 6             | 0           | -0.722366               | -2.499233 | -0.168778 |
| 16            | 6             | 0           | -0.284442               | -3.560660 | -0.951951 |
| 17            | 6             | 0           | 0.654257                | -3.322625 | -1.950425 |
| 18            | 6             | 0           | 1.126869                | -2.040901 | -2.207859 |
| 19            | 6             | 0           | 0.661184                | -0.982644 | -1.435877 |

|    |    |   |           |           |           |
|----|----|---|-----------|-----------|-----------|
| 20 | 8  | 0 | -3.021487 | -0.573203 | -1.204466 |
| 21 | 6  | 0 | -4.567914 | -0.482966 | 3.151424  |
| 22 | 35 | 0 | 1.373599  | -4.786895 | -2.912104 |
| 23 | 35 | 0 | -9.889536 | 0.070265  | -1.461717 |
| 24 | 6  | 0 | -0.044771 | 0.217548  | 2.854684  |
| 25 | 6  | 0 | 0.388150  | 0.455996  | 1.394319  |
| 26 | 6  | 0 | 1.745082  | -0.194789 | 1.168021  |
| 27 | 6  | 0 | 2.624129  | 0.767335  | 0.401294  |
| 28 | 7  | 0 | 1.950342  | 1.959911  | 0.378375  |
| 29 | 6  | 0 | 0.659283  | 1.972651  | 1.097075  |
| 30 | 7  | 0 | 2.010672  | -1.360953 | 1.571198  |
| 31 | 6  | 0 | 3.261749  | -1.978416 | 1.339041  |
| 32 | 6  | 0 | 4.417161  | -1.569295 | 2.006647  |
| 33 | 6  | 0 | 5.610027  | -2.255593 | 1.815535  |
| 34 | 6  | 0 | 5.638751  | -3.343575 | 0.949685  |
| 35 | 6  | 0 | 4.493965  | -3.766299 | 0.284621  |
| 36 | 6  | 0 | 3.297019  | -3.091924 | 0.497159  |
| 37 | 35 | 0 | 7.270102  | -4.274124 | 0.679649  |
| 38 | 6  | 0 | -0.464275 | 2.743128  | 0.361623  |
| 39 | 6  | 0 | 2.623218  | 3.139196  | -0.045959 |
| 40 | 6  | 0 | 2.808014  | 4.199820  | 0.840786  |
| 41 | 6  | 0 | 3.477423  | 5.345815  | 0.427305  |
| 42 | 6  | 0 | 3.976041  | 5.407542  | -0.869521 |
| 43 | 6  | 0 | 3.820490  | 4.348103  | -1.756328 |
| 44 | 6  | 0 | 3.138485  | 3.210108  | -1.339820 |
| 45 | 8  | 0 | 3.706808  | 0.533201  | -0.094518 |
| 46 | 35 | 0 | 4.887795  | 6.967519  | -1.437098 |
| 47 | 1  | 0 | -4.210530 | 1.450513  | 2.224602  |
| 48 | 1  | 0 | 0.709172  | 0.644286  | 3.522661  |
| 49 | 1  | 0 | -0.043223 | -0.866816 | 3.008674  |
| 50 | 1  | 0 | -1.407324 | 1.879140  | 3.245151  |
| 51 | 1  | 0 | -1.745331 | 0.416274  | 4.155074  |
| 52 | 1  | 0 | 0.809075  | 2.461907  | 2.071322  |
| 53 | 1  | 0 | 2.423083  | 4.137409  | 1.853983  |
| 54 | 1  | 0 | 3.617724  | 6.178077  | 1.107444  |
| 55 | 1  | 0 | 4.221490  | 4.412426  | -2.761310 |
| 56 | 1  | 0 | 3.004581  | 2.372638  | -2.016320 |
| 57 | 1  | 0 | -5.130002 | -1.443439 | -1.348887 |
| 58 | 1  | 0 | -7.435652 | -1.395102 | -2.232938 |
| 59 | 1  | 0 | -8.539732 | 1.458920  | 0.775219  |
| 60 | 1  | 0 | -6.246687 | 1.433343  | 1.652415  |
| 61 | 1  | 0 | -1.415799 | -2.676884 | 0.648793  |
| 62 | 1  | 0 | -0.637983 | -4.568219 | -0.764044 |
| 63 | 1  | 0 | 1.855219  | -1.872854 | -2.992932 |
| 64 | 1  | 0 | 1.016264  | 0.025468  | -1.632035 |
| 65 | 1  | 0 | 2.390214  | -3.415777 | -0.003635 |
| 66 | 1  | 0 | 4.529770  | -4.616852 | -0.387284 |
| 67 | 1  | 0 | 6.512493  | -1.942393 | 2.328333  |
| 68 | 1  | 0 | 4.379392  | -0.711850 | 2.670951  |
| 69 | 1  | 0 | -5.598367 | -0.625029 | 2.803041  |
| 70 | 6  | 0 | -3.911797 | -1.859506 | 3.241447  |
| 71 | 6  | 0 | -4.648654 | 0.211999  | 4.510527  |
| 72 | 6  | 0 | -0.424744 | 4.253179  | 0.636889  |
| 73 | 6  | 0 | -0.532362 | 2.491751  | -1.147140 |
| 74 | 1  | 0 | -1.395942 | 2.376365  | 0.806425  |
| 75 | 1  | 0 | -5.220885 | -0.403000 | 5.211135  |
| 76 | 1  | 0 | -3.661164 | 0.376788  | 4.951372  |
| 77 | 1  | 0 | -5.148228 | 1.183366  | 4.429051  |
| 78 | 1  | 0 | -4.506653 | -2.521649 | 3.877005  |
| 79 | 1  | 0 | -3.831203 | -2.322516 | 2.251961  |
| 80 | 1  | 0 | -2.905114 | -1.794861 | 3.670342  |
| 81 | 1  | 0 | -1.316438 | 3.121098  | -1.580015 |
| 82 | 1  | 0 | 0.410397  | 2.765600  | -1.633554 |
| 83 | 1  | 0 | -0.768834 | 1.453719  | -1.387569 |
| 84 | 1  | 0 | -1.379502 | 4.698720  | 0.341645  |
| 85 | 1  | 0 | -0.268202 | 4.469476  | 1.699863  |
| 86 | 1  | 0 | 0.361711  | 4.753416  | 0.065612  |
